# Supplementary material for: Using Bacteria to Determine Protein Kinase Specificity and Predict Target Substrates
Source: PLoS One. 2012 Dec 26;7(12):e52747. doi: 10.1371/journal.pone.0052747 (PMC3530509; doi:10.1371/journal.pone.0052747)
Supplement: Table 1 — Raw mass spectrometry phosphorylated peptide sequence results for the Protein Kinase A (PKA), Casein Kinase II (CK II), and control ProPeL experiments. (XLS) [file pone.0052747.s001.xls]

## Sheet: Overview
	Spectral file naming convention:				<Sample type>_<SCXfraction#>.<Spectrum#>.<Spectrum#>.<Parent ion charge>.dta
	If a fraction is followed by the letter 'r' it means that it was run as a replicate
	Spectral (.dta files) and SEQUEST output files (.out files) are contained in two TAR gzipped files (dtas.tgz and outs.tgz) and are available upon request from the corresponding author
	All spectral hits were selected for a predicted False Discovery Rate of 0% using a reverse proteomic database
	The difference between scores for the top hit and the second hit (the deltaXCORR) was > 0.08 in all cases
	UTFctrl = Untransformed E. coli control
	PUC19ctrl = empty vector control

## Sheet: PKA
Spectral file	Sequest Xcorr	Z	Peptide	E. coli Protein
PKA_1.00294.00294.2.dta	2.8132	2	K.GNRS*QQVTDACK.K	gi|16129570|ref|NP_416129.1| fumarate hydratase (fumarase A), aerobic Class I [Escherichia coli str. K-12 substr. MG1655]
PKA_1.00463.00463.2.dta	2.767	2	R.KIS*NGEGVER.V	gi|16130527|ref|NP_417097.1| 50S ribosomal subunit protein L19 [Escherichia coli str. K-12 substr. MG1655]
PKA_1.00467.00467.2.dta	2.7703	2	K.AKVS*TATVSR.A	gi|16131772|ref|NP_418369.1| DNA-binding transcriptional dual regulator [Escherichia coli str. K-12 substr. MG1655]
PKA_1.00538.00538.2.dta	2.8876	2	K.AKVS*TATVSR.A	gi|16131772|ref|NP_418369.1| DNA-binding transcriptional dual regulator [Escherichia coli str. K-12 substr. MG1655]
PKA_1.00577.00577.2.dta	2.8543	2	R.SKIAS*VQNTQK.I	gi|16131601|ref|NP_418189.1| F1 sector of membrane-bound ATP synthase, gamma subunit [Escherichia coli str. K-12 substr. MG1655]
PKA_1.00605.00605.2.dta	2.7212	2	R.GKS*VDIDR.A	gi|16129261|ref|NP_415816.1| gamma-Glu-gamma-aminobutyraldehyde dehydrogenase, NAD(P)H-dependent [Escherichia coli str. K-12 substr. MG1655]
PKA_1.00707.00707.2.dta	2.8042	2	R.KMT*EIAQK.L	gi|90111290|ref|NP_416048.2| DNA-binding transcriptional dual activator of multiple antibiotic resistance [Escherichia coli str. K-12 substr. MG1655]
PKA_1.00708.00708.2.dta	3.1484	2	R.AKAS*QLDEAR.R	gi|16130440|ref|NP_417010.1| 1-hydroxy-2-methyl-2-(E)-butenyl 4-diphosphate synthase [Escherichia coli str. K-12 substr. MG1655]
PKA_1.00735.00735.2.dta	3.2092	2	K.KAS*AIVTNR.G	gi|16129658|ref|NP_416217.1| phosphoenolpyruvate synthase [Escherichia coli str. K-12 substr. MG1655]
PKA_1.00774.00774.2.dta	3.2291	2	R.AKAS*QLDEAR.R	gi|16130440|ref|NP_417010.1| 1-hydroxy-2-methyl-2-(E)-butenyl 4-diphosphate synthase [Escherichia coli str. K-12 substr. MG1655]
PKA_1.00814.00814.2.dta	3.2724	2	R.AKAS*QLDEAR.R	gi|16130440|ref|NP_417010.1| 1-hydroxy-2-methyl-2-(E)-butenyl 4-diphosphate synthase [Escherichia coli str. K-12 substr. MG1655]
PKA_1.00852.00852.2.dta	3.451	2	R.AKAS*QLDEAR.R	gi|16130440|ref|NP_417010.1| 1-hydroxy-2-methyl-2-(E)-butenyl 4-diphosphate synthase [Escherichia coli str. K-12 substr. MG1655]
PKA_1.00888.00888.2.dta	3.3618	2	R.AKAS*QLDEAR.R	gi|16130440|ref|NP_417010.1| 1-hydroxy-2-methyl-2-(E)-butenyl 4-diphosphate synthase [Escherichia coli str. K-12 substr. MG1655]
PKA_1.00983.00983.2.dta	3.1595	2	R.AKAS*QLDEAR.R	gi|16130440|ref|NP_417010.1| 1-hydroxy-2-methyl-2-(E)-butenyl 4-diphosphate synthase [Escherichia coli str. K-12 substr. MG1655]
PKA_1.01071.01071.2.dta	3.2349	2	R.AKAS*QLDEAR.R	gi|16130440|ref|NP_417010.1| 1-hydroxy-2-methyl-2-(E)-butenyl 4-diphosphate synthase [Escherichia coli str. K-12 substr. MG1655]
PKA_1.01281.01281.2.dta	2.8852	2	K.LKQGIES*ATQK.K	gi|90111132|ref|NP_414960.2| predicted nucleotide binding protein [Escherichia coli str. K-12 substr. MG1655]
PKA_1.01321.01321.2.dta	3.4929	2	K.ATHADS*AVNVTK.F	gi|16130898|ref|NP_417472.1| predicted protein [Escherichia coli str. K-12 substr. MG1655]
PKA_1.01337.01337.2.dta	3.0952	2	K.HAVT*EASPM#VK.A	gi|221800783|ref|NP_418621.2| 30S ribosomal subunit protein S6 [Escherichia coli str. K-12 substr. MG1655]
PKA_1.01508.01508.2.dta	2.7756	2	K.NAAS*GTLADAHK.A	gi|16129613|ref|NP_416172.1| predicted lipoprotein [Escherichia coli str. K-12 substr. MG1655]
PKA_1.01540.01540.2.dta	3.2989	2	R.GKT*VVVEGCEEK.L	gi|16129500|ref|NP_416059.1| conserved protein [Escherichia coli str. K-12 substr. MG1655]
PKA_1.01549.01549.2.dta	3.4277	2	K.KAVDALAGQS*AK.L	gi|16130254|ref|NP_416822.1| predicted semialdehyde dehydrogenase [Escherichia coli str. K-12 substr. MG1655]
PKA_1.01594.01594.2.dta	3.2133	2	-.MKT*AYIAK.Q	gi|16131612|ref|NP_418200.1| asparagine synthetase A [Escherichia coli str. K-12 substr. MG1655]
PKA_1.01612.01612.2.dta	3.5063	2	R.HVS*SCGCNIEDSR.L	gi|90111443|ref|NP_416974.4| DNA-binding transcriptional repressor, regulatory protein accessory to GcvA [Escherichia coli str. K-12 substr. MG1655]
PKA_1.01800.01800.2.dta	3.4611	2	K.GHS*SAQYSGEIK.G	gi|16129141|ref|NP_415696.1| predicted protein [Escherichia coli str. K-12 substr. MG1655]
PKA_1.01807.01807.2.dta	2.9148	2	R.LHT*VLER.L	gi|16131769|ref|NP_418366.1| molecular chaperone and ATPase component of HslUV protease [Escherichia coli str. K-12 substr. MG1655]
PKA_1.01857.01857.2.dta	3.0409	2	R.S*GQAETLADHEGR.H	gi|16130451|ref|NP_417021.1| DnaK-like molecular chaperone specific for IscU [Escherichia coli str. K-12 substr. MG1655]
PKA_1.01939.01939.2.dta	3.4767	2	K.TKS*DLPESVK.H	gi|16129180|ref|NP_415735.1| predicted cation regulator [Escherichia coli str. K-12 substr. MG1655]
PKA_1.01954.01954.2.dta	3.6212	2	R.APHVS*EKAS*TAMEK.S	gi|16131197|ref|NP_417777.1| 50S ribosomal subunit protein L23 [Escherichia coli str. K-12 substr. MG1655]
PKA_1.01956.01956.2.dta	3.2919	2	R.LLHQANAGAS*VAR.N	gi|16131486|ref|NP_418072.1| predicted glycosyl transferase [Escherichia coli str. K-12 substr. MG1655]
PKA_1.01981.01981.2.dta	3.3014	2	R.VAKS*QVVIEK.G	gi|90111518|ref|NP_417428.2| conserved protein [Escherichia coli str. K-12 substr. MG1655]
PKA_1.01983.01983.2.dta	2.7545	2	K.GQS*HLANLK.A	gi|49176407|ref|YP_026251.1| DNA helicase and single-stranded DNA-dependent ATPase [Escherichia coli str. K-12 substr. MG1655]
PKA_1.02033.02033.2.dta	3.373	2	R.HGAS*NVTCAYR.R	gi|16130393|ref|NP_416963.1| fused predicted oxidoreductase: FeS binding subunit/NAD/FAD-binding subunit [Escherichia coli str. K-12 substr. MG1655]
PKA_1.02111.02111.2.dta	3.0033	2	K.MEKVS*AGYGDR.I	gi|16131231|ref|NP_417811.1| fused predicted transporter subunits of ABC superfamily: ATP-binding components [Escherichia coli str. K-12 substr. MG1655]
PKA_1.02125.02125.3.dta	3.869	3	R.HGAS*CPVGM#GVSCSADR.N	gi|16129570|ref|NP_416129.1| fumarate hydratase (fumarase A), aerobic Class I [Escherichia coli str. K-12 substr. MG1655]
PKA_1.02125.02125.3.dta	3.869	3	R.HGAS*CPVGM#GVSCSADR.N	gi|16131948|ref|NP_418546.1| anaerobic class I fumarate hydratase (fumarase B) [Escherichia coli str. K-12 substr. MG1655]
PKA_1.02126.02126.2.dta	3.1704	2	R.VLTNS*ETNSIKK.D	gi|16131849|ref|NP_418447.1| conserved protein [Escherichia coli str. K-12 substr. MG1655]
PKA_1.02204.02204.3.dta	3.77	3	R.GQVM#ERYT*LHS*QGK.I	gi|16129658|ref|NP_416217.1| phosphoenolpyruvate synthase [Escherichia coli str. K-12 substr. MG1655]
PKA_1.02327.02327.3.dta	3.1051	3	R.GDKNT*ADGAAVNAMR.I	gi|16131763|ref|NP_418360.1| fructose 1,6-bisphosphatase II [Escherichia coli str. K-12 substr. MG1655]
PKA_1.02336.02336.2.dta	4.0233	2	K.HAVT*EASPMVK.A	gi|221800783|ref|NP_418621.2| 30S ribosomal subunit protein S6 [Escherichia coli str. K-12 substr. MG1655]
PKA_1.02360.02360.2.dta	2.9696	2	-.MNKS*QLIDK.I	gi|16128425|ref|NP_414974.1| HU, DNA-binding transcriptional regulator, beta subunit [Escherichia coli str. K-12 substr. MG1655]
PKA_1.02387.02387.2.dta	2.7816	2	-.M#NKS*QLIDK.I	gi|16128425|ref|NP_414974.1| HU, DNA-binding transcriptional regulator, beta subunit [Escherichia coli str. K-12 substr. MG1655]
PKA_1.02431.02431.2.dta	3.1485	2	K.GKS*LDEAQAIK.N	gi|16130454|ref|NP_417024.1| scaffold protein [Escherichia coli str. K-12 substr. MG1655]
PKA_1.02491.02491.2.dta	3.2461	2	K.HAVT*EASPMVK.A	gi|221800783|ref|NP_418621.2| 30S ribosomal subunit protein S6 [Escherichia coli str. K-12 substr. MG1655]
PKA_1.02499.02499.2.dta	4.6281	2	R.RSS*EVYGQTNIGGK.G	gi|16131764|ref|NP_418361.1| glycerol kinase [Escherichia coli str. K-12 substr. MG1655]
PKA_1.02519.02519.2.dta	3.3	2	R.KT*VVADGVGQGYK.E	gi|16128156|ref|NP_414705.1| conserved protein [Escherichia coli str. K-12 substr. MG1655]
PKA_1.02535.02535.2.dta	3.018	2	K.ARS*IIVATGAK.W	gi|90111152|ref|NP_415139.2| alkyl hydroperoxide reductase, F52a subunit, FAD/NAD(P)-binding [Escherichia coli str. K-12 substr. MG1655]
PKA_1.02552.02552.2.dta	2.9826	2	R.KT*LGLTGEEK.I	gi|16129237|ref|NP_415792.1| aconitate hydratase 1 [Escherichia coli str. K-12 substr. MG1655]
PKA_1.02605.02605.2.dta	2.8184	2	R.RET*LEDAVK.H	gi|16130504|ref|NP_417074.1| pyruvate formate lyase subunit [Escherichia coli str. K-12 substr. MG1655]
PKA_1.02635.02635.2.dta	3.3103	2	K.AGKT*ITLEDGR.Q	gi|90111412|ref|NP_416771.4| binuclear zinc phosphodiesterase [Escherichia coli str. K-12 substr. MG1655]
PKA_1.02641.02641.2.dta	3.0431	2	K.SGGKS*GDFKVEADD.-	gi|16128751|ref|NP_415304.1| molybdopterin biosynthesis, protein C [Escherichia coli str. K-12 substr. MG1655]
PKA_1.02706.02706.2.dta	2.8867	2	R.HQS*TLPLR.A	gi|16129770|ref|NP_416330.1| fused predicted membrane protein/conserved protein [Escherichia coli str. K-12 substr. MG1655]
PKA_1.02719.02719.2.dta	3.0842	2	R.KIT*AAPVVDENGK.L	gi|90111480|ref|NP_417188.4| predicted phosphosugar-binding protein [Escherichia coli str. K-12 substr. MG1655]
PKA_1.02720.02720.2.dta	2.9608	2	R.VM#DS*NDLEKER.G	gi|49176434|ref|YP_026274.1| GTP-binding protein [Escherichia coli str. K-12 substr. MG1655]
PKA_1.02802.02802.2.dta	2.9055	2	R.TLVTKNS*FR.Y	gi|16128870|ref|NP_415423.1| pyruvate formate lyase I [Escherichia coli str. K-12 substr. MG1655]
PKA_1.02802.02802.2.dta	2.9055	2	R.TLVTKNS*FR.Y	gi|49176316|ref|YP_026205.1| pyruvate formate-lyase 4/2-ketobutyrate formate-lyase [Escherichia coli str. K-12 substr. MG1655]
PKA_1.02803.02803.2.dta	3.3875	2	R.AKAS*AQLETIK.T	gi|16130342|ref|NP_416911.1| PEP-protein phosphotransferase of PTS system (enzyme I) [Escherichia coli str. K-12 substr. MG1655]
PKA_1.02827.02827.2.dta	2.7434	2	K.LKS*EFVK.K	gi|16131934|ref|NP_418532.1| conserved protein [Escherichia coli str. K-12 substr. MG1655]
PKA_1.02847.02847.2.dta	3.0329	2	K.GGGIS*GQAGAIR.H	gi|16131120|ref|NP_417697.1| 30S ribosomal subunit protein S9 [Escherichia coli str. K-12 substr. MG1655]
PKA_1.02850.02850.2.dta	3.6556	2	K.IIRNT*NFEDAK.V	gi|16130342|ref|NP_416911.1| PEP-protein phosphotransferase of PTS system (enzyme I) [Escherichia coli str. K-12 substr. MG1655]
PKA_1.02915.02915.2.dta	3.42	2	K.SVPVKDT*EVVER.L	gi|16128226|ref|NP_414775.1| DNA-binding transcriptional regulator [Escherichia coli str. K-12 substr. MG1655]
PKA_1.02923.02923.2.dta	3.0181	2	K.KLT*SGPALPGK.L	gi|16130926|ref|NP_417502.1| DNA topoisomerase IV, subunit B [Escherichia coli str. K-12 substr. MG1655]
PKA_1.02984.02984.2.dta	2.9228	2	-.MES*KVVVPAQGK.K	gi|16129099|ref|NP_415654.1| e14 prophage; isocitrate dehydrogenase, specific for NADP+ [Escherichia coli str. K-12 substr. MG1655]
PKA_1.03008.03008.3.dta	3.4417	3	K.GRS*HAT*AQEEILK.L	gi|16130963|ref|NP_417539.1| RNA polymerase, sigma 70 (sigma D) factor [Escherichia coli str. K-12 substr. MG1655]
PKA_1.03010.03010.2.dta	2.811	2	R.WQGKGT*FVQSQK.V	gi|162135910|ref|NP_417834.6| predicted DNA-binding transcriptional regulator [Escherichia coli str. K-12 substr. MG1655]
PKA_1.03025.03025.2.dta	4.0482	2	R.SHAT*AQEEILK.L	gi|16130963|ref|NP_417539.1| RNA polymerase, sigma 70 (sigma D) factor [Escherichia coli str. K-12 substr. MG1655]
PKA_1.03038.03038.2.dta	3.2712	2	R.DGHALS*DEEIR.F	gi|16132199|ref|NP_418799.1| thymidine phosphorylase [Escherichia coli str. K-12 substr. MG1655]
PKA_1.03094.03094.2.dta	4.1601	2	R.REEES*AAAAEVEER.T	gi|16129198|ref|NP_415753.1| global DNA-binding transcriptional dual regulator H-NS [Escherichia coli str. K-12 substr. MG1655]
PKA_1.03145.03145.3.dta	3.4423	3	R.HGAS*CPVGM#GVSCSADR.N	gi|16129570|ref|NP_416129.1| fumarate hydratase (fumarase A), aerobic Class I [Escherichia coli str. K-12 substr. MG1655]
PKA_1.03145.03145.3.dta	3.4423	3	R.HGAS*CPVGM#GVSCSADR.N	gi|16131948|ref|NP_418546.1| anaerobic class I fumarate hydratase (fumarase B) [Escherichia coli str. K-12 substr. MG1655]
PKA_1.03157.03157.2.dta	3.6639	2	K.AGERPDNS*AIIAAR.E	gi|16129587|ref|NP_416146.1| fused predicted 4Fe-4S ferredoxin-type protein/conserved protein [Escherichia coli str. K-12 substr. MG1655]
PKA_1.03202.03202.3.dta	3.1347	3	R.ANS*HAPEAVVEGASR.A	gi|16128712|ref|NP_415265.1| membrane spanning protein in TolA-TolQ-TolR complex [Escherichia coli str. K-12 substr. MG1655]
PKA_1.03237.03237.2.dta	3.64	2	R.NPQTGKEIT*IAAAK.V	gi|16128425|ref|NP_414974.1| HU, DNA-binding transcriptional regulator, beta subunit [Escherichia coli str. K-12 substr. MG1655]
PKA_1.03264.03264.2.dta	3.0247	2	R.VMAGKS*LAEQGVTK.E	gi|16128027|ref|NP_414574.1| carbamoyl-phosphate synthase large subunit [Escherichia coli str. K-12 substr. MG1655]
PKA_1.03266.03266.2.dta	2.779	2	R.VRT*LVYPAK.M	gi|16128593|ref|NP_415143.1| regulator of nucleoside diphosphate kinase [Escherichia coli str. K-12 substr. MG1655]
PKA_1.03274.03274.2.dta	3.0807	2	R.RTGT*VLAAVK.L	gi|16130800|ref|NP_417374.1| predicted folate-dependent regulatory protein [Escherichia coli str. K-12 substr. MG1655]
PKA_1.03285.03285.2.dta	2.9931	2	R.YCVNSAS*LR.F	gi|16129732|ref|NP_416292.1| methionine sulfoxide reductase B [Escherichia coli str. K-12 substr. MG1655]
PKA_1.03339.03339.2.dta	3.0924	2	K.HFS*VNQM#INK.E	gi|16129595|ref|NP_416154.1| tyrosyl-tRNA synthetase [Escherichia coli str. K-12 substr. MG1655]
PKA_1.03349.03349.2.dta	2.839	2	R.AQYVVTRDT*IK.A	gi|16130963|ref|NP_417539.1| RNA polymerase, sigma 70 (sigma D) factor [Escherichia coli str. K-12 substr. MG1655]
PKA_1.03456.03456.2.dta	3.5374	2	K.LQAKAS*DLVSR.K	gi|90111097|ref|NP_414731.2| modulator of Rho-dependent transcription termination [Escherichia coli str. K-12 substr. MG1655]
PKA_1.03464.03464.3.dta	3.255	3	K.APAKES*APAAAAPAAQPALAARS*EK.R	gi|16128702|ref|NP_415255.1| dihydrolipoyltranssuccinase [Escherichia coli str. K-12 substr. MG1655]
PKA_1.03541.03541.2.dta	3.7311	2	R.KGS*ENYALTTNQGVR.I	gi|49176140|ref|YP_025308.1| hydroperoxidase HPII(III) (catalase) [Escherichia coli str. K-12 substr. MG1655]
PKA_1.03570.03570.2.dta	2.8335	2	R.HGAS*CPVGMGVSCSADR.N	gi|16129570|ref|NP_416129.1| fumarate hydratase (fumarase A), aerobic Class I [Escherichia coli str. K-12 substr. MG1655]
PKA_1.03570.03570.2.dta	2.8335	2	R.HGAS*CPVGMGVSCSADR.N	gi|16131948|ref|NP_418546.1| anaerobic class I fumarate hydratase (fumarase B) [Escherichia coli str. K-12 substr. MG1655]
PKA_1.03648.03648.2.dta	2.7331	2	R.KT*NVFNEQVR.Y	gi|16131334|ref|NP_417919.1| predicted transporter subunit: membrane component of ABC superfamily [Escherichia coli str. K-12 substr. MG1655]
PKA_1.03706.03706.3.dta	3.8369	3	R.HGAS*CPVGMGVSCSADR.N	gi|16129570|ref|NP_416129.1| fumarate hydratase (fumarase A), aerobic Class I [Escherichia coli str. K-12 substr. MG1655]
PKA_1.03706.03706.3.dta	3.8369	3	R.HGAS*CPVGMGVSCSADR.N	gi|16131948|ref|NP_418546.1| anaerobic class I fumarate hydratase (fumarase B) [Escherichia coli str. K-12 substr. MG1655]
PKA_1.03716.03716.3.dta	3.7521	3	K.VAKS*NVPALEACPQK.R	gi|16131221|ref|NP_417801.1| 30S ribosomal subunit protein S12 [Escherichia coli str. K-12 substr. MG1655]
PKA_1.03750.03750.2.dta	2.8743	2	R.RNS*SGGPSMGGPGFR.L	gi|16130400|ref|NP_416970.1| conserved protein [Escherichia coli str. K-12 substr. MG1655]
PKA_1.03868.03868.2.dta	3.3743	2	R.KSS*LQENLENSASR.L	gi|16131745|ref|NP_418341.1| DNA-binding transcriptional activator, L-rhamnose-binding [Escherichia coli str. K-12 substr. MG1655]
PKA_1.03871.03871.2.dta	3.9829	2	K.YKFT*DVNGETK.T	gi|16130583|ref|NP_417155.1| DNA binding protein, nucleoid-associated [Escherichia coli str. K-12 substr. MG1655]
PKA_1.03873.03873.3.dta	3.2217	3	-.M#KS*VVNDTDGIVR.V	gi|16130029|ref|NP_416594.1| galactitol-1-phosphate dehydrogenase, Zn-dependent and NAD(P)-binding [Escherichia coli str. K-12 substr. MG1655]
PKA_1.03882.03882.3.dta	4.034	3	R.S*CREGVCGSDGLNMNGK.N	gi|16128699|ref|NP_415252.1| succinate dehydrogenase, FeS subunit [Escherichia coli str. K-12 substr. MG1655]
PKA_1.03929.03929.2.dta	2.7179	2	K.LDKS*LLAR.R	gi|16130393|ref|NP_416963.1| fused predicted oxidoreductase: FeS binding subunit/NAD/FAD-binding subunit [Escherichia coli str. K-12 substr. MG1655]
PKA_1.03944.03944.2.dta	3.2001	2	K.DAGYTAVIS*HR.S	gi|16130686|ref|NP_417259.1| enolase [Escherichia coli str. K-12 substr. MG1655]
PKA_1.03995.03995.2.dta	3.0726	2	K.HSAS*FDICENGAK.A	gi|16129460|ref|NP_416018.1| predicted oxidoreductase [Escherichia coli str. K-12 substr. MG1655]
PKA_1.04054.04054.2.dta	3.553	2	R.NERLS*GYAGSAGVAK.V	gi|16132206|ref|NP_418806.1| predicted repair protein [Escherichia coli str. K-12 substr. MG1655]
PKA_1.04079.04079.3.dta	3.833	3	K.APAKES*APAAAAPAAQPALAAR.S	gi|16128702|ref|NP_415255.1| dihydrolipoyltranssuccinase [Escherichia coli str. K-12 substr. MG1655]
PKA_1.04096.04096.2.dta	2.7554	2	R.KS*IMELSGR.T	gi|16128644|ref|NP_415194.1| isopentenyl-adenosine A37 tRNA methylthiolase [Escherichia coli str. K-12 substr. MG1655]
PKA_1.04127.04127.2.dta	2.9488	2	R.GRIS*GAENIVK.N	gi|90111383|ref|NP_416589.2| predicted protein [Escherichia coli str. K-12 substr. MG1655]
PKA_1.04139.04139.2.dta	3.3298	2	R.KT*IASNAITINGEK.Q	gi|16129595|ref|NP_416154.1| tyrosyl-tRNA synthetase [Escherichia coli str. K-12 substr. MG1655]
PKA_1.04225.04225.3.dta	3.1778	3	-.MKS*VVNDTDGIVR.V	gi|16130029|ref|NP_416594.1| galactitol-1-phosphate dehydrogenase, Zn-dependent and NAD(P)-binding [Escherichia coli str. K-12 substr. MG1655]
PKA_1.04278.04278.2.dta	3.9568	2	K.KIS*ADQVDQEVER.F	gi|16130342|ref|NP_416911.1| PEP-protein phosphotransferase of PTS system (enzyme I) [Escherichia coli str. K-12 substr. MG1655]
PKA_1.04295.04295.2.dta	3.3484	2	R.GNRVT*VDGEIVR.N	gi|16130121|ref|NP_416688.1| 16S rRNA pseudouridylate 516 synthase [Escherichia coli str. K-12 substr. MG1655]
PKA_1.04327.04327.2.dta	2.7487	2	R.FFKS*NS*ETIK.-	gi|16131188|ref|NP_417768.1| 50S ribosomal subunit protein L24 [Escherichia coli str. K-12 substr. MG1655]
PKA_1.04337.04337.2.dta	3.2109	2	R.HAECS*VLVVR.-	gi|90111262|ref|NP_415894.4| stress-induced protein, ATP-binding protein [Escherichia coli str. K-12 substr. MG1655]
PKA_1.04348.04348.2.dta	3.618	2	K.HMLES*IDSASQK.Q	gi|16128603|ref|NP_415153.1| DNA-binding response regulator in two-component regulatory system with citA [Escherichia coli str. K-12 substr. MG1655]
PKA_1.04367.04367.3.dta	3.495	3	R.AQT*RIQQLEYR.L	gi|16130434|ref|NP_417004.1| exonuclease VII, large subunit [Escherichia coli str. K-12 substr. MG1655]
PKA_1.04410.04410.2.dta	3.0583	2	R.GQS*HLAPINYM#R.R	gi|16130640|ref|NP_417213.1| methyl-directed mismatch repair protein [Escherichia coli str. K-12 substr. MG1655]
PKA_1.04421.04421.2.dta	3.54	2	R.KLS*EQGLITR.H	gi|90111660|ref|NP_418320.2| predicted DNA-binding transcriptional regulator [Escherichia coli str. K-12 substr. MG1655]
PKA_1.04457.04457.2.dta	3.6776	2	K.SAGGIVLTGS*AAAK.S	gi|16131967|ref|NP_418566.1| Cpn10 chaperonin GroES, small subunit of GroESL [Escherichia coli str. K-12 substr. MG1655]
PKA_1.04475.04475.2.dta	2.8191	2	K.KAT*VELLNR.Q	gi|16128780|ref|NP_415333.1| Fe-binding and storage protein [Escherichia coli str. K-12 substr. MG1655]
PKA_1.04478.04478.3.dta	3.4534	3	-.MKS*VVNDTDGIVR.V	gi|16130029|ref|NP_416594.1| galactitol-1-phosphate dehydrogenase, Zn-dependent and NAD(P)-binding [Escherichia coli str. K-12 substr. MG1655]
PKA_1.04483.04483.3.dta	3.2762	3	R.IRS*VGEM#AENQFR.V	gi|16131817|ref|NP_418414.1| RNA polymerase, beta subunit [Escherichia coli str. K-12 substr. MG1655]
PKA_1.04501.04501.2.dta	2.8091	2	R.SEKDS*MGAIDVPADK.L	gi|16129569|ref|NP_416128.1| fumarate hydratase (fumarase C),aerobic Class II [Escherichia coli str. K-12 substr. MG1655]
PKA_1.04543.04543.2.dta	3.8147	2	R.HDS*GDPVEWGEK.A	gi|16128898|ref|NP_415451.1| nicotinate phosphoribosyltransferase [Escherichia coli str. K-12 substr. MG1655]
PKA_1.04550.04550.2.dta	3.4229	2	K.KLS*NNTACVFTGK.G	gi|16129715|ref|NP_416275.1| glutamate dehydrogenase, NADP-specific [Escherichia coli str. K-12 substr. MG1655]
PKA_1.04560.04560.2.dta	3.0431	2	R.LRVS*VADVSK.V	gi|16129064|ref|NP_415619.1| fused glucose-specific PTS enzymes: IIB component/IIC component [Escherichia coli str. K-12 substr. MG1655]
PKA_1.04574.04574.2.dta	3.2754	2	R.TGKCS*FLPEER.E	gi|16129703|ref|NP_416263.1| exonuclease III [Escherichia coli str. K-12 substr. MG1655]
PKA_1.04628.04628.2.dta	3.6122	2	R.NLKAS*DFTDEK.F	gi|90111588|ref|NP_417866.4| predicted transcriptional accessory protein [Escherichia coli str. K-12 substr. MG1655]
PKA_1.04681.04681.3.dta	3.5415	3	R.KS*TPFAAQVAAER.C	gi|16131176|ref|NP_417756.1| 30S ribosomal subunit protein S11 [Escherichia coli str. K-12 substr. MG1655]
PKA_1.04692.04692.2.dta	2.7716	2	K.AGLRYS*ANNYVK.W	gi|90111568|ref|NP_417738.4| conserved protein [Escherichia coli str. K-12 substr. MG1655]
PKA_1.04726.04726.3.dta	3.0807	3	R.FNS*LTKEQQQDVITR.T	gi|16128870|ref|NP_415423.1| pyruvate formate lyase I [Escherichia coli str. K-12 substr. MG1655]
PKA_1.04737.04737.2.dta	2.7407	2	R.VGS*CGAVLPHVK.L	gi|16132201|ref|NP_418801.1| purine-nucleoside phosphorylase [Escherichia coli str. K-12 substr. MG1655]
PKA_1.04744.04744.2.dta	3.9598	2	K.S*AGGIVLTGSAAAK.S	gi|16131967|ref|NP_418566.1| Cpn10 chaperonin GroES, small subunit of GroESL [Escherichia coli str. K-12 substr. MG1655]
PKA_1.04777.04777.2.dta	3.1337	2	R.KIS*VDSATMMNK.G	gi|16128166|ref|NP_414715.1| 1-deoxy-D-xylulose 5-phosphate reductoisomerase [Escherichia coli str. K-12 substr. MG1655]
PKA_1.04789.04789.2.dta	3.6339	2	R.KVT*VQQVLVK.G	gi|16131535|ref|NP_418121.1| cryptic adenine deaminase [Escherichia coli str. K-12 substr. MG1655]
PKA_1.04830.04830.2.dta	3.7987	2	R.KGS*QVYIEGQLR.T	gi|16131885|ref|NP_418483.1| single-stranded DNA-binding protein [Escherichia coli str. K-12 substr. MG1655]
PKA_1.04855.04855.2.dta	4.1124	2	-.MKS*VVNDTDGIVR.V	gi|16130029|ref|NP_416594.1| galactitol-1-phosphate dehydrogenase, Zn-dependent and NAD(P)-binding [Escherichia coli str. K-12 substr. MG1655]
PKA_1.04877.04877.2.dta	2.7612	2	R.IYGT*AWADKK.A	gi|16129675|ref|NP_416234.1| threonyl-tRNA synthetase [Escherichia coli str. K-12 substr. MG1655]
PKA_1.04892.04892.2.dta	3.5572	2	R.LHS*QLNYSSLR.E	gi|145698325|ref|NP_418007.3| biotin sulfoxide reductase [Escherichia coli str. K-12 substr. MG1655]
PKA_1.04896.04896.2.dta	3.111	2	R.GKS*VEEILGK.-	gi|16131182|ref|NP_417762.1| 30S ribosomal subunit protein S5 [Escherichia coli str. K-12 substr. MG1655]
PKA_1.04910.04910.2.dta	2.9666	2	R.KM#QS*FDADIPK.I	gi|16129649|ref|NP_416208.1| 3-dehydroquinate dehydratase [Escherichia coli str. K-12 substr. MG1655]
PKA_1.04976.04976.2.dta	3.2143	2	R.KGS*QVYIEGQLR.T	gi|16131885|ref|NP_418483.1| single-stranded DNA-binding protein [Escherichia coli str. K-12 substr. MG1655]
PKA_1.05016.05016.2.dta	3.8823	2	R.VKS*QAIEGLVK.A	gi|16128421|ref|NP_414970.1| peptidyl-prolyl cis/trans isomerase (trigger factor) [Escherichia coli str. K-12 substr. MG1655]
PKA_1.05060.05060.2.dta	3.2102	2	K.VKS*LIADEDNPNLK.L	gi|16128149|ref|NP_414698.1| conserved protein [Escherichia coli str. K-12 substr. MG1655]
PKA_1.05095.05095.2.dta	3.0511	2	R.IIGKS*GEPLIR.K	gi|16128980|ref|NP_415534.1| fused DNA-binding transcriptional regulator/proline dehydrogenase/pyrroline-5-carboxylate dehydrogenase [Escherichia coli str. K-12 substr. MG1655]
PKA_1.05129.05129.2.dta	3.2977	2	R.GRS*MDSVMAQYQK.T	gi|90111379|ref|NP_416570.2| uridine/cytidine kinase [Escherichia coli str. K-12 substr. MG1655]
PKA_1.05157.05157.2.dta	3.2198	2	R.VKS*QAIEGLVK.A	gi|16128421|ref|NP_414970.1| peptidyl-prolyl cis/trans isomerase (trigger factor) [Escherichia coli str. K-12 substr. MG1655]
PKA_1.05204.05204.3.dta	3.228	3	R.IHS*FESCGTVDGPGIR.F	gi|16128869|ref|NP_415422.1| pyruvate formate lyase activating enzyme 1 [Escherichia coli str. K-12 substr. MG1655]
PKA_1.05222.05222.3.dta	3.0283	3	R.IAHWVGQGATIS*DR.V	gi|16130530|ref|NP_417100.1| 30S ribosomal subunit protein S16 [Escherichia coli str. K-12 substr. MG1655]
PKA_1.05239.05239.2.dta	3.2482	2	K.VKNT*SFAPGNVSIK.W	gi|16131895|ref|NP_418493.1| acetyl-CoA synthetase [Escherichia coli str. K-12 substr. MG1655]
PKA_1.05289.05289.2.dta	2.7996	2	R.LRGETAS*FDIEANGK.V	gi|16131817|ref|NP_418414.1| RNA polymerase, beta subunit [Escherichia coli str. K-12 substr. MG1655]
PKA_1.05304.05304.2.dta	2.9912	2	R.IHTS*YENVLGK.N	gi|16131372|ref|NP_417957.1| glutathione oxidoreductase [Escherichia coli str. K-12 substr. MG1655]
PKA_1.05323.05323.2.dta	3.3813	2	R.RLT*LQDNPAIAR.V	gi|49176479|ref|YP_026287.1| predicted acetyltransferase [Escherichia coli str. K-12 substr. MG1655]
PKA_1.05363.05363.3.dta	3.0179	3	R.IAHWVGQGAT*ISDR.V	gi|16130530|ref|NP_417100.1| 30S ribosomal subunit protein S16 [Escherichia coli str. K-12 substr. MG1655]
PKA_1.05375.05375.2.dta	3.9076	2	R.HNIS*FAEVESK.L	gi|16128366|ref|NP_414915.1| D-alanine-D-alanine ligase A [Escherichia coli str. K-12 substr. MG1655]
PKA_1.05382.05382.3.dta	3.7375	3	R.T*KNNPVLIGEPGVGK.T	gi|16130513|ref|NP_417083.1| protein disaggregation chaperone [Escherichia coli str. K-12 substr. MG1655]
PKA_1.05393.05393.2.dta	2.7932	2	R.FVTLRVS*AK.G	gi|16131508|ref|NP_418094.1| 50S ribosomal subunit protein L28 [Escherichia coli str. K-12 substr. MG1655]
PKA_1.05404.05404.2.dta	3.2382	2	R.HMS*GDIDNFPR.D	gi|16131052|ref|NP_417629.1| predicted enzyme [Escherichia coli str. K-12 substr. MG1655]
PKA_1.05471.05471.2.dta	2.974	2	K.HIGES*ASDILR.R	gi|16128663|ref|NP_415213.1| regulatory protein for replication initiation [Escherichia coli str. K-12 substr. MG1655]
PKA_1.05491.05491.2.dta	3.443	2	R.RES*LGLDSESIR.L	gi|16129497|ref|NP_416056.1| dipeptidyl carboxypeptidase II [Escherichia coli str. K-12 substr. MG1655]
PKA_1.05502.05502.2.dta	3.1634	2	-.MNKYT*INDITR.A	gi|16131721|ref|NP_418317.1| predicted aldolase [Escherichia coli str. K-12 substr. MG1655]
PKA_1.05528.05528.3.dta	4.3362	3	R.AYS*GVRPLVASDDDPSGR.N	gi|16130176|ref|NP_416744.1| sn-glycerol-3-phosphate dehydrogenase (anaerobic), large subunit, FAD/NAD(P)-binding [Escherichia coli str. K-12 substr. MG1655]
PKA_1.05548.05548.3.dta	3.1459	3	K.LAIVGRPNVGKS*T*LTNR.I	gi|90111450|ref|NP_417006.2| predicted GTP-binding protein [Escherichia coli str. K-12 substr. MG1655]
PKA_1.05553.05553.2.dta	3.7162	2	R.HMS*GDIDNFPR.D	gi|16131052|ref|NP_417629.1| predicted enzyme [Escherichia coli str. K-12 substr. MG1655]
PKA_1.05555.05555.2.dta	2.8414	2	K.ITIKAS*SGLNEDEIQK.M	gi|16128008|ref|NP_414555.1| chaperone Hsp70, co-chaperone with DnaJ [Escherichia coli str. K-12 substr. MG1655]
PKA_1.05632.05632.2.dta	3.3459	2	K.ITIKAS*S*GLNEDEIQK.M	gi|16128008|ref|NP_414555.1| chaperone Hsp70, co-chaperone with DnaJ [Escherichia coli str. K-12 substr. MG1655]
PKA_1.05633.05633.3.dta	3.7187	3	K.EHGYETVVM#GAS*FR.N	gi|16128002|ref|NP_414549.1| transaldolase B [Escherichia coli str. K-12 substr. MG1655]
PKA_1.05634.05634.2.dta	3.4377	2	K.HLT*QVTPAGQEIIR.I	gi|16129236|ref|NP_415791.1| DNA-binding transcriptional dual regulator, O-acetyl-L-serine-binding [Escherichia coli str. K-12 substr. MG1655]
PKA_1.05654.05654.2.dta	2.8646	2	R.LHS*QLNYAELR.K	gi|90111350|ref|NP_416386.4| trimethylamine N-oxide reductase system III, catalytic subunit [Escherichia coli str. K-12 substr. MG1655]
PKA_1.05691.05691.4.dta	3.4659	4	R.LKNT*PT*EYGIRFVAT*SGEEEGK.L	gi|16130660|ref|NP_417233.1| aminopeptidase in alkaline phosphatase isozyme conversion [Escherichia coli str. K-12 substr. MG1655]
PKA_1.05718.05718.2.dta	3.0124	2	-.MKS*VVNDTDGIVR.V	gi|16130029|ref|NP_416594.1| galactitol-1-phosphate dehydrogenase, Zn-dependent and NAD(P)-binding [Escherichia coli str. K-12 substr. MG1655]
PKA_1.05775.05775.2.dta	2.9174	2	R.AKES*LMVLR.D	gi|16129241|ref|NP_415796.1| conserved protein [Escherichia coli str. K-12 substr. MG1655]
PKA_1.05818.05818.2.dta	3.1818	2	R.FAT*HGGYLLQGK.E	gi|16129202|ref|NP_415757.1| fused acetaldehyde-CoA dehydrogenase/iron-dependent alcohol dehydrogenase/pyruvate-formate lyase deactivase [Escherichia coli str. K-12 substr. MG1655]
PKA_1.05858.05858.2.dta	2.8853	2	R.RGS*FAAAADELGR.V	gi|16131000|ref|NP_417576.1| predicted DNA-binding transcriptional regulator [Escherichia coli str. K-12 substr. MG1655]
PKA_1.05874.05874.2.dta	2.9522	2	R.S*QILDEAKAEAEQER.T	gi|16131604|ref|NP_418192.1| F0 sector of membrane-bound ATP synthase, subunit b [Escherichia coli str. K-12 substr. MG1655]
PKA_1.05880.05880.2.dta	2.9486	2	R.KLS*FTGSTEIGR.Q	gi|16130575|ref|NP_417147.1| succinate-semialdehyde dehydrogenase I, NADP-dependent [Escherichia coli str. K-12 substr. MG1655]
PKA_1.05911.05911.3.dta	3.0881	3	R.ENELEEAVM#S*DRDTGAAAEPR.A	gi|16131060|ref|NP_417637.1| fused protein chain initiation factor 2, IF2: membrane protein/conserved protein [Escherichia coli str. K-12 substr. MG1655]
PKA_1.05953.05953.2.dta	3.0626	2	R.RAFS*GIVAGNVK.E	gi|16130702|ref|NP_417275.1| conserved protein [Escherichia coli str. K-12 substr. MG1655]
PKA_1.05958.05958.2.dta	3.0877	2	R.GFGHT*LGNALR.R	gi|16131174|ref|NP_417754.1| RNA polymerase, alpha subunit [Escherichia coli str. K-12 substr. MG1655]
PKA_1.05959.05959.2.dta	2.9487	2	R.KAS*IPEGVWTK.C	gi|16130251|ref|NP_416819.1| acetyl-CoA carboxylase, beta (carboxyltranferase) subunit [Escherichia coli str. K-12 substr. MG1655]
PKA_1.05967.05967.2.dta	2.9865	2	R.REGT*DLFLK.S	gi|16131175|ref|NP_417755.1| 30S ribosomal subunit protein S4 [Escherichia coli str. K-12 substr. MG1655]
PKA_1.05979.05979.2.dta	3.559	2	R.HIS*TIFVSK.L	gi|16130771|ref|NP_417345.1| predicted DNA-binding transcriptional regulator [Escherichia coli str. K-12 substr. MG1655]
PKA_1.05995.05995.2.dta	4.047	2	R.HQQADLS*LVEAADK.Y	gi|16131473|ref|NP_418059.1| conserved protein [Escherichia coli str. K-12 substr. MG1655]
PKA_1.06003.06003.3.dta	3.5159	3	R.NM#INVALNNGT*LQHPVK.G	gi|16131182|ref|NP_417762.1| 30S ribosomal subunit protein S5 [Escherichia coli str. K-12 substr. MG1655]
PKA_1.06044.06044.2.dta	4.4617	2	R.HLNAT*IINEGDINTR.R	gi|16130232|ref|NP_416800.1| phosphate acetyltransferase [Escherichia coli str. K-12 substr. MG1655]
PKA_1.06079.06079.2.dta	3.9899	2	R.KIT*QGDDLAPGVLK.I	gi|16131817|ref|NP_418414.1| RNA polymerase, beta subunit [Escherichia coli str. K-12 substr. MG1655]
PKA_1.06098.06098.2.dta	3.0556	2	K.LRS*IVPEMR.R	gi|16128084|ref|NP_414633.1| UDP-N-acetylmuramate:L-alanine ligase [Escherichia coli str. K-12 substr. MG1655]
PKA_1.06107.06107.2.dta	2.7666	2	R.RELS*INDEVIK.L	gi|16129093|ref|NP_415648.1| DNA-binding response regulator in two-component regulatory system with PhoQ [Escherichia coli str. K-12 substr. MG1655]
PKA_1.06125.06125.2.dta	3.741	2	K.HGT*LAAVAPLPR.A	gi|16129547|ref|NP_416106.1| oxidoreductase, Fe-S subunit [Escherichia coli str. K-12 substr. MG1655]
PKA_1.06127.06127.3.dta	3.2604	3	R.EHEDT*LAGIEATGVTQR.N	gi|16129234|ref|NP_415789.1| predicted protein [Escherichia coli str. K-12 substr. MG1655]
PKA_1.06131.06131.3.dta	3.544	3	R.IRNGT*VPNVPNVEVTAR.Q	gi|16128844|ref|NP_415397.1| conserved protein with nucleoside triphosphate hydrolase domain [Escherichia coli str. K-12 substr. MG1655]
PKA_1.06142.06142.2.dta	3.0879	2	K.NMS*KAEAFEESVR.M	gi|49176090|ref|YP_025300.1| oligopeptide transporter subunit [Escherichia coli str. K-12 substr. MG1655]
PKA_1.06158.06158.2.dta	3.3418	2	R.HGT*ISLTGPDLQR.Q	gi|16128439|ref|NP_414988.1| predicted methyltransferase [Escherichia coli str. K-12 substr. MG1655]
PKA_1.06203.06203.2.dta	2.7428	2	R.HT*IMVANLAPR.K	gi|16130052|ref|NP_416617.1| methionyl-tRNA synthetase [Escherichia coli str. K-12 substr. MG1655]
PKA_1.06205.06205.2.dta	3.222	2	K.HFS*VNQMINK.E	gi|16129595|ref|NP_416154.1| tyrosyl-tRNA synthetase [Escherichia coli str. K-12 substr. MG1655]
PKA_1.06240.06240.2.dta	3.2638	2	K.IHIGLDNYS*GGR.A	gi|16131609|ref|NP_418197.1| glucose-inhibited cell-division protein [Escherichia coli str. K-12 substr. MG1655]
PKA_1.06252.06252.2.dta	3.8536	2	K.AYGS*TNPINVVR.A	gi|16131182|ref|NP_417762.1| 30S ribosomal subunit protein S5 [Escherichia coli str. K-12 substr. MG1655]
PKA_1.06263.06263.2.dta	2.7784	2	R.KMQS*FDADIPK.I	gi|16129649|ref|NP_416208.1| 3-dehydroquinate dehydratase [Escherichia coli str. K-12 substr. MG1655]
PKA_1.06311.06311.2.dta	3.2681	2	R.GES*NILLER.L	gi|16128980|ref|NP_415534.1| fused DNA-binding transcriptional regulator/proline dehydrogenase/pyrroline-5-carboxylate dehydrogenase [Escherichia coli str. K-12 substr. MG1655]
PKA_1.06327.06327.2.dta	3.1459	2	R.IGS*LVANDADSYR.Y	gi|49176426|ref|YP_026269.1| bifunctional 2-octaprenyl-6-methoxy-1,4-benzoquinone methylase/ S-adenosylmethionine:2-DMK methyltransferase [Escherichia coli str. K-12 substr. MG1655]
PKA_1.06331.06331.3.dta	3.685	3	R.S*REVIELSEQNAAQMR.H	gi|145698235|ref|NP_415350.2| fused predicted peptide transport subunits of ABC superfamily: ATP-binding components [Escherichia coli str. K-12 substr. MG1655]
PKA_1.06400.06400.2.dta	2.7494	2	R.KMQS*FDADIPK.I	gi|16129649|ref|NP_416208.1| 3-dehydroquinate dehydratase [Escherichia coli str. K-12 substr. MG1655]
PKA_1.06406.06406.2.dta	3.9205	2	K.AEIEGEIGDS*HMGLAAR.M	gi|16130606|ref|NP_417179.1| DNA strand exchange and recombination protein with protease and nuclease activity [Escherichia coli str. K-12 substr. MG1655]
PKA_1.06431.06431.3.dta	3.8311	3	K.AGDEGKLFGS*IGTR.D	gi|16132025|ref|NP_418624.1| 50S ribosomal subunit protein L9 [Escherichia coli str. K-12 substr. MG1655]
PKA_1.06543.06543.3.dta	3.9535	3	K.FGAVHSYS*IGPVER.F	gi|16129245|ref|NP_415800.1| predicted DNA-binding transcriptional regulator [Escherichia coli str. K-12 substr. MG1655]
PKA_1.06570.06570.2.dta	3.9469	2	R.HGNTSAAS*VPCALDEAVR.D	gi|16129054|ref|NP_415609.1| 3-oxoacyl-[acyl-carrier-protein] synthase III [Escherichia coli str. K-12 substr. MG1655]
PKA_1.06573.06573.3.dta	3.3476	3	K.AGDEGKLFGS*IGTR.D	gi|16132025|ref|NP_418624.1| 50S ribosomal subunit protein L9 [Escherichia coli str. K-12 substr. MG1655]
PKA_1.06628.06628.3.dta	3.419	3	K.KVT*WAAS*LGDRSENADYQYNK.K	gi|90111587|ref|YP_026216.2| transcription elongation factor [Escherichia coli str. K-12 substr. MG1655]
PKA_1.06636.06636.2.dta	3.0891	2	K.FTNPNVKDECGCGES*FHV.-	gi|16130453|ref|NP_417023.1| FeS cluster assembly protein [Escherichia coli str. K-12 substr. MG1655]
PKA_1.06644.06644.2.dta	2.889	2	R.KET*LVEYGFR.L	gi|16128747|ref|NP_415300.1| excinulease of nucleotide excision repair, DNA damage recognition component [Escherichia coli str. K-12 substr. MG1655]
PKA_1.06645.06645.2.dta	3.4007	2	K.KDS*TGICFIGER.K	gi|90111218|ref|NP_415651.4| tRNA (5-methylaminomethyl-2-thiouridylate)-methyltransferase [Escherichia coli str. K-12 substr. MG1655]
PKA_1.06662.06662.2.dta	2.7369	2	R.GYAS*LDYNFKR.F	gi|16130494|ref|NP_417064.1| GTP-binding membrane protein [Escherichia coli str. K-12 substr. MG1655]
PKA_1.06685.06685.3.dta	3.8765	3	K.MEKS*IVVAIER.F	gi|16131190|ref|NP_417770.1| 30S ribosomal subunit protein S17 [Escherichia coli str. K-12 substr. MG1655]
PKA_1.06714.06714.3.dta	3.2866	3	R.RT*IRS*LVTGDR.V	gi|90111696|ref|NP_418585.4| ribosome small subunit-dependent GTPase A [Escherichia coli str. K-12 substr. MG1655]
PKA_1.06718.06718.3.dta	4.023	3	R.VFQTHSPVVDSIS*VK.R	gi|16130527|ref|NP_417097.1| 50S ribosomal subunit protein L19 [Escherichia coli str. K-12 substr. MG1655]
PKA_1.06722.06722.3.dta	3.1134	3	K.M#EKS*IVVAIER.F	gi|16131190|ref|NP_417770.1| 30S ribosomal subunit protein S17 [Escherichia coli str. K-12 substr. MG1655]
PKA_1.06771.06771.3.dta	4.1203	3	R.S*KNVPFESGIDSVGSAR.L	gi|49176207|ref|NP_416791.3| NADH:ubiquinone oxidoreductase, membrane subunit A [Escherichia coli str. K-12 substr. MG1655]
PKA_1.06780.06780.2.dta	3.4584	2	K.HQFAQS*LNYEIAK.T	gi|16130232|ref|NP_416800.1| phosphate acetyltransferase [Escherichia coli str. K-12 substr. MG1655]
PKA_1.06783.06783.2.dta	3.0832	2	R.AMT*QHLQEISESVR.Q	gi|16129499|ref|NP_416058.1| predicted DNA-binding transcriptional regulator [Escherichia coli str. K-12 substr. MG1655]
PKA_1.06786.06786.2.dta	3.2009	2	K.AHIVATNPPFGS*AAGTNITR.T	gi|16132170|ref|NP_418769.1| DNA methylase M [Escherichia coli str. K-12 substr. MG1655]
PKA_1.06832.06832.3.dta	3.1253	3	K.AHIVATNPPFGS*AAGTNITR.T	gi|16132170|ref|NP_418769.1| DNA methylase M [Escherichia coli str. K-12 substr. MG1655]
PKA_1.06853.06853.2.dta	3.5438	2	R.HLS*EAEIDNYVR.K	gi|90111211|ref|NP_415605.2| predicted protein [Escherichia coli str. K-12 substr. MG1655]
PKA_1.06864.06864.2.dta	4.0259	2	K.IHCS*ILAEDAIK.A	gi|16130454|ref|NP_417024.1| scaffold protein [Escherichia coli str. K-12 substr. MG1655]
PKA_1.06874.06874.2.dta	4.5452	2	K.IHCS*ILAEDAIK.A	gi|16130454|ref|NP_417024.1| scaffold protein [Escherichia coli str. K-12 substr. MG1655]
PKA_1.06875.06875.2.dta	2.9835	2	K.KLS*MAPSYFSSK.M	gi|16131274|ref|NP_417856.1| ADP-ribose diphosphatase [Escherichia coli str. K-12 substr. MG1655]
PKA_1.06876.06876.3.dta	3.2495	3	R.VNS*DVLTVSTVNSQDQVTQKPLR.D	gi|16131149|ref|NP_417727.1| global DNA-binding transcriptional dual regulator [Escherichia coli str. K-12 substr. MG1655]
PKA_1.06940.06940.3.dta	3.8666	3	K.IRS*T*VGHDLNLDVCSK.C	gi|16131774|ref|NP_418371.1| 50S ribosomal subunit protein L31 [Escherichia coli str. K-12 substr. MG1655]
PKA_1.06998.06998.3.dta	3.9677	3	R.ALS*REYAQLSDVSR.C	gi|16129174|ref|NP_415729.1| peptide chain release factor RF-1 [Escherichia coli str. K-12 substr. MG1655]
PKA_1.07009.07009.2.dta	4.6214	2	R.HIDS*LTEEEENWR.R	gi|16132212|ref|NP_418812.1| phosphoglyceromutase 2, co-factor independent [Escherichia coli str. K-12 substr. MG1655]
PKA_1.07050.07050.2.dta	3.6734	2	K.HVDS*LITIPNDK.L	gi|16128088|ref|NP_414637.1| GTP-binding tubulin-like cell division protein [Escherichia coli str. K-12 substr. MG1655]
PKA_1.07053.07053.3.dta	3.0649	3	R.AAT*HDVLAGLTAR.E	gi|16130963|ref|NP_417539.1| RNA polymerase, sigma 70 (sigma D) factor [Escherichia coli str. K-12 substr. MG1655]
PKA_1.07084.07084.3.dta	3.1729	3	K.IRS*T*VGHDLNLDVCSK.C	gi|16131774|ref|NP_418371.1| 50S ribosomal subunit protein L31 [Escherichia coli str. K-12 substr. MG1655]
PKA_1.07164.07164.3.dta	4.4622	3	R.SLQRQT*LAEVIEPR.Y	gi|16128087|ref|NP_414636.1| ATP-binding cell division protein involved in recruitment of FtsK to Z ring [Escherichia coli str. K-12 substr. MG1655]
PKA_1.07176.07176.2.dta	3.0055	2	K.SIIDKLS*LAGK.S	gi|16129855|ref|NP_416418.1| ferritin iron storage protein (cytoplasmic) [Escherichia coli str. K-12 substr. MG1655]
PKA_1.07185.07185.3.dta	3.3971	3	K.AGTHDS*HGAPLGDAEIALTR.E	gi|49176286|ref|YP_026188.1| transketolase 1, thiamin-binding [Escherichia coli str. K-12 substr. MG1655]
PKA_1.07207.07207.2.dta	3.4772	2	R.GKDLGS*MDVNEVIEK.L	gi|16129675|ref|NP_416234.1| threonyl-tRNA synthetase [Escherichia coli str. K-12 substr. MG1655]
PKA_1.07214.07214.2.dta	2.8683	2	R.RNYGS*LIGEATAER.I	gi|90111564|ref|NP_417717.2| cell wall structural complex MreBCD, actin-like component MreB [Escherichia coli str. K-12 substr. MG1655]
PKA_1.07219.07219.3.dta	4.7678	3	K.YLKGS*LAYAEDPCGAEQGFSGR.E	gi|16130694|ref|NP_417267.1| (D)-glucarate dehydratase 1 [Escherichia coli str. K-12 substr. MG1655]
PKA_1.07238.07238.3.dta	3.2712	3	R.ENELEEAVMS*DRDTGAAAEPR.A	gi|16131060|ref|NP_417637.1| fused protein chain initiation factor 2, IF2: membrane protein/conserved protein [Escherichia coli str. K-12 substr. MG1655]
PKA_1.07309.07309.2.dta	3.3037	2	R.GLKNS*LNNVLTVR.A	gi|16129046|ref|NP_415601.1| flagellar hook-filament junction protein [Escherichia coli str. K-12 substr. MG1655]
PKA_1.07357.07357.2.dta	3.2554	2	R.LKS*LTLLAR.Q	gi|16128980|ref|NP_415534.1| fused DNA-binding transcriptional regulator/proline dehydrogenase/pyrroline-5-carboxylate dehydrogenase [Escherichia coli str. K-12 substr. MG1655]
PKA_1.07371.07371.2.dta	2.7199	2	K.DGS*GKLLYCSFCGK.S	gi|16128423|ref|NP_414972.1| ATPase and specificity subunit of ClpX-ClpP ATP-dependent serine protease [Escherichia coli str. K-12 substr. MG1655]
PKA_1.07377.07377.2.dta	3.778	2	R.VHS*DYSMIDGLAK.T	gi|16128177|ref|NP_414726.1| DNA polymerase III alpha subunit [Escherichia coli str. K-12 substr. MG1655]
PKA_1.07493.07493.2.dta	2.9022	2	K.INVFDRS*MSPAVEK.A	gi|16128165|ref|NP_414714.1| ribosome recycling factor [Escherichia coli str. K-12 substr. MG1655]
PKA_1.07536.07536.3.dta	3.6541	3	K.EHGYETVVMGAS*FR.N	gi|16128002|ref|NP_414549.1| transaldolase B [Escherichia coli str. K-12 substr. MG1655]
PKA_1.07583.07583.3.dta	3.8137	3	K.DLEHPIEVPVGKAT*LGR.I	gi|16131600|ref|NP_418188.1| F1 sector of membrane-bound ATP synthase, beta subunit [Escherichia coli str. K-12 substr. MG1655]
PKA_1.07591.07591.3.dta	3.2168	3	K.DLEHPIEVPVGKAT*LGR.I	gi|16131600|ref|NP_418188.1| F1 sector of membrane-bound ATP synthase, beta subunit [Escherichia coli str. K-12 substr. MG1655]
PKA_1.07612.07612.2.dta	3.0535	2	R.HGLQS*ILR.E	gi|16131052|ref|NP_417629.1| predicted enzyme [Escherichia coli str. K-12 substr. MG1655]
PKA_1.07648.07648.2.dta	3.2533	2	K.KIT*VSIPLK.V	gi|16131776|ref|NP_418373.1| DNA-binding transcriptional repressor, S-adenosylmethionine-binding [Escherichia coli str. K-12 substr. MG1655]
PKA_1.07663.07663.3.dta	4.8462	3	K.FCRFT*AEGVQEIDYK.D	gi|16132024|ref|NP_418623.1| 30S ribosomal subunit protein S18 [Escherichia coli str. K-12 substr. MG1655]
PKA_1.07713.07713.3.dta	3.5922	3	K.GRGVS*ACATCDGFFYR.N	gi|16128855|ref|NP_415408.1| thioredoxin reductase, FAD/NAD(P)-binding [Escherichia coli str. K-12 substr. MG1655]
PKA_1.07725.07725.2.dta	3.4562	2	K.HIIS*INDLSR.D	gi|16132067|ref|NP_418666.1| aspartate carbamoyltransferase, catalytic subunit [Escherichia coli str. K-12 substr. MG1655]
PKA_1.07732.07732.2.dta	3.9694	2	R.HGS*GIVCLCITEDR.R	gi|16130937|ref|NP_417513.1| 3,4-dihydroxy-2-butanone-4-phosphate synthase [Escherichia coli str. K-12 substr. MG1655]
PKA_1.07739.07739.3.dta	4.5672	3	R.AREAS*GFGADYNAMIR.V	gi|16130604|ref|NP_417177.1| alanyl-tRNA synthetase [Escherichia coli str. K-12 substr. MG1655]
PKA_1.07744.07744.3.dta	3.6438	3	R.TKNAT*LEVAEALER.N	gi|90111550|ref|NP_417631.2| ATP-dependent RNA helicase [Escherichia coli str. K-12 substr. MG1655]
PKA_1.07763.07763.3.dta	3.4018	3	R.SGAS*VGIDDMVIPEKK.H	gi|16131818|ref|NP_418415.1| RNA polymerase, beta prime subunit [Escherichia coli str. K-12 substr. MG1655]
PKA_1.07773.07773.3.dta	3.1712	3	K.AEGKS*EFAENDAYVHATPLIR.R	gi|16128108|ref|NP_414657.1| pyruvate dehydrogenase, dihydrolipoyltransacetylase component E2 [Escherichia coli str. K-12 substr. MG1655]
PKA_1.07816.07816.3.dta	4.0652	3	K.FCRFT*AEGVQEIDYK.D	gi|16132024|ref|NP_418623.1| 30S ribosomal subunit protein S18 [Escherichia coli str. K-12 substr. MG1655]
PKA_1.07829.07829.3.dta	3.078	3	K.AAHS*FNLLDAR.K	gi|16131431|ref|NP_418017.1| glycine tRNA synthetase, alpha subunit [Escherichia coli str. K-12 substr. MG1655]
PKA_1.07851.07851.2.dta	3.3613	2	K.IDKS*VMAGVIIR.A	gi|16131603|ref|NP_418191.1| F1 sector of membrane-bound ATP synthase, delta subunit [Escherichia coli str. K-12 substr. MG1655]
PKA_1.07863.07863.2.dta	3.0287	2	R.RVT*LSTSGVVPALDK.L	gi|16130442|ref|NP_417012.1| predicted enzyme [Escherichia coli str. K-12 substr. MG1655]
PKA_1.07927.07927.3.dta	3.1055	3	R.GLPEREDS*LEESYWDR.-	gi|16128461|ref|NP_415010.1| inosine/guanosine kinase [Escherichia coli str. K-12 substr. MG1655]
PKA_1.07937.07937.3.dta	3.487	3	K.MAGQMGNERVT*VQSLDVVR.V	gi|16131199|ref|NP_417779.1| 50S ribosomal subunit protein L3 [Escherichia coli str. K-12 substr. MG1655]
PKA_1.07961.07961.2.dta	3.1267	2	K.IGS*LGMDVYENER.D	gi|16129341|ref|NP_415898.1| fermentative D-lactate dehydrogenase, NAD-dependent [Escherichia coli str. K-12 substr. MG1655]
PKA_1.08001.08001.2.dta	3.1614	2	K.KAS*QVAILNANYIASR.L	gi|16130805|ref|NP_417379.1| glycine decarboxylase, PLP-dependent, subunit (protein P) of glycine cleavage complex [Escherichia coli str. K-12 substr. MG1655]
PKA_1.08019.08019.2.dta	4.2053	2	K.KGT*VLNSDISSVISR.L	gi|90111647|ref|NP_418204.2| predicted cytoplasmic sugar-binding protein [Escherichia coli str. K-12 substr. MG1655]
PKA_1.08046.08046.3.dta	3.9859	3	R.RLNS*QQPEVAEQLWK.D	gi|16129339|ref|NP_415896.1| fused predicted pyruvate-flavodoxin oxidoreductase: conserved protein/conserved protein/FeS binding protein [Escherichia coli str. K-12 substr. MG1655]
PKA_1.08052.08052.2.dta	3.1308	2	R.S*HDALTAVTSLSVDK.T	gi|16129052|ref|NP_415607.1| 50S ribosomal subunit protein L32 [Escherichia coli str. K-12 substr. MG1655]
PKA_1.08054.08054.2.dta	2.9035	2	K.GRAS*YTMEFLK.Y	gi|16131219|ref|NP_417799.1| protein chain elongation factor EF-G, GTP-binding [Escherichia coli str. K-12 substr. MG1655]
PKA_1.08062.08062.2.dta	3.2449	2	K.KFT*ALGPYIR.E	gi|16128226|ref|NP_414775.1| DNA-binding transcriptional regulator [Escherichia coli str. K-12 substr. MG1655]
PKA_1.08073.08073.2.dta	4.6412	2	R.RAT*AFAISVINDK.A	gi|16131465|ref|NP_418051.1| lyase containing HEAT-repeat [Escherichia coli str. K-12 substr. MG1655]
PKA_1.08118.08118.2.dta	3.0914	2	R.FRALS*NPDLYEGDGELR.V	gi|16128457|ref|NP_415006.1| molecular chaperone HSP90 family [Escherichia coli str. K-12 substr. MG1655]
PKA_1.08126.08126.3.dta	4.0752	3	K.VKDS*LKDS*FDDSSANLFK.L	gi|16131470|ref|NP_418056.1| fused mannitol-specific PTS enzymes: IIA components/IIB components/IIC components [Escherichia coli str. K-12 substr. MG1655]
PKA_1.08128.08128.2.dta	3.2428	2	K.FGS*ELLAK.F	gi|16131220|ref|NP_417800.1| 30S ribosomal subunit protein S7 [Escherichia coli str. K-12 substr. MG1655]
PKA_1.08131.08131.3.dta	3.536	3	R.VAT*LKGADANILQQVR.E	gi|16132205|ref|NP_418805.1| 3-phosphoserine phosphatase [Escherichia coli str. K-12 substr. MG1655]
PKA_1.08139.08139.2.dta	3.1958	2	K.SGTKS*FLESLGSDQAK.D	gi|16128457|ref|NP_415006.1| molecular chaperone HSP90 family [Escherichia coli str. K-12 substr. MG1655]
PKA_1.08153.08153.2.dta	2.779	2	R.GS*FESFAQAVR.D	gi|16130029|ref|NP_416594.1| galactitol-1-phosphate dehydrogenase, Zn-dependent and NAD(P)-binding [Escherichia coli str. K-12 substr. MG1655]
PKA_1.08159.08159.2.dta	2.8093	2	K.HAVIALTS*IYGVGK.T	gi|16131177|ref|NP_417757.1| 30S ribosomal subunit protein S13 [Escherichia coli str. K-12 substr. MG1655]
PKA_1.08196.08196.2.dta	2.8711	2	K.KIT*VVPILR.A	gi|90111448|ref|NP_416993.2| uracil phosphoribosyltransferase [Escherichia coli str. K-12 substr. MG1655]
PKA_1.08198.08198.2.dta	2.9198	2	R.S*HDALTAVTSLSVDK.T	gi|16129052|ref|NP_415607.1| 50S ribosomal subunit protein L32 [Escherichia coli str. K-12 substr. MG1655]
PKA_1.08209.08209.3.dta	3.2724	3	K.AGDQIQS*GVDAAIKPGNTLPMR.N	gi|16131196|ref|NP_417776.1| 50S ribosomal subunit protein L2 [Escherichia coli str. K-12 substr. MG1655]
PKA_1.08211.08211.3.dta	3.1656	3	R.KWDM#QFAPS*ICQQCSIGCNISPGER.Y	gi|145698290|ref|NP_416786.4| NADH:ubiquinone oxidoreductase, chain G [Escherichia coli str. K-12 substr. MG1655]
PKA_1.08212.08212.3.dta	3.0849	3	R.DVS*LLHKPTT*QISDFHVATR.F	gi|16128329|ref|NP_414878.1| beta-D-galactosidase [Escherichia coli str. K-12 substr. MG1655]
PKA_1.08248.08248.2.dta	2.834	2	R.KIS*WM#EIYTGEK.S	gi|16129099|ref|NP_415654.1| e14 prophage; isocitrate dehydrogenase, specific for NADP+ [Escherichia coli str. K-12 substr. MG1655]
PKA_1.08251.08251.2.dta	3.1249	2	K.S*GVLTGLPDAYGR.G	gi|16128870|ref|NP_415423.1| pyruvate formate lyase I [Escherichia coli str. K-12 substr. MG1655]
PKA_1.08297.08297.3.dta	3.7355	3	R.NPS*ISTHLLGSNASSVIR.H	gi|16128590|ref|NP_415140.1| universal stress protein UP12 [Escherichia coli str. K-12 substr. MG1655]
PKA_1.08298.08298.2.dta	3.895	2	K.HIS*GQFNAELESIR.T	gi|16131592|ref|NP_418180.1| negative regulator of PhoR/PhoB two-component regulator [Escherichia coli str. K-12 substr. MG1655]
PKA_1.08329.08329.3.dta	3.0026	3	K.IFVDKLT*QAQLINGR.L	gi|90111118|ref|NP_414888.4| nucleoprotein/polynucleotide-associated enzyme [Escherichia coli str. K-12 substr. MG1655]
PKA_1.08356.08356.2.dta	2.8553	2	R.RAAT*SVKDANFVEEVEEE.-	gi|16130518|ref|NP_417088.1| cold shock protein associated with 30S ribosomal subunit [Escherichia coli str. K-12 substr. MG1655]
PKA_1.08368.08368.2.dta	3.3553	2	R.GVKLS*AEDIWDR.C	gi|16130926|ref|NP_417502.1| DNA topoisomerase IV, subunit B [Escherichia coli str. K-12 substr. MG1655]
PKA_1.08369.08369.2.dta	2.8831	2	R.ERAS*EISALIVEEGGK.I	gi|16129376|ref|NP_415933.1| aldehyde dehydrogenase A, NAD-linked [Escherichia coli str. K-12 substr. MG1655]
PKA_1.08378.08378.3.dta	3.8136	3	K.KLS*S*GRGNVLAQAEAFR.G	gi|16131681|ref|NP_418276.1| predicted recombination limiting protein [Escherichia coli str. K-12 substr. MG1655]
PKA_1.08384.08384.2.dta	3.5168	2	K.FES*EVYILSKDEGGR.H	gi|16131218|ref|NP_417798.1| protein chain elongation factor EF-Tu (duplicate of tufB) [Escherichia coli str. K-12 substr. MG1655]
PKA_1.08384.08384.2.dta	3.5168	2	K.FES*EVYILSKDEGGR.H	gi|16131810|ref|NP_418407.1| protein chain elongation factor EF-Tu (duplicate of tufA) [Escherichia coli str. K-12 substr. MG1655]
PKA_1.08394.08394.3.dta	3.4454	3	R.KT*VVADGVGQGYKEVQEISPNLR.Y	gi|16128156|ref|NP_414705.1| conserved protein [Escherichia coli str. K-12 substr. MG1655]
PKA_1.08409.08409.3.dta	4.0343	3	R.YGAS*VRQDVLGDLM#SR.N	gi|16128421|ref|NP_414970.1| peptidyl-prolyl cis/trans isomerase (trigger factor) [Escherichia coli str. K-12 substr. MG1655]
PKA_1.08429.08429.2.dta	3.758	2	R.LHS*FELAMDVK.E	gi|16131052|ref|NP_417629.1| predicted enzyme [Escherichia coli str. K-12 substr. MG1655]
PKA_1.08450.08450.2.dta	3.7399	2	R.DRS*VEENLALFEK.M	gi|16128656|ref|NP_415206.1| glutamyl-tRNA synthetase [Escherichia coli str. K-12 substr. MG1655]
PKA_1.08456.08456.3.dta	3.7959	3	K.AM#DEQGKS*LDDFLIKQ.-	gi|16129198|ref|NP_415753.1| global DNA-binding transcriptional dual regulator H-NS [Escherichia coli str. K-12 substr. MG1655]
PKA_1.08510.08510.2.dta	3.6026	2	R.S*FFVGNDHMVEDVER.F	gi|16132054|ref|NP_418653.1| fructose-1,6-bisphosphatase I [Escherichia coli str. K-12 substr. MG1655]
PKA_1.08521.08521.3.dta	3.1282	3	R.IYT*KDISFEAPNAPHVFQK.D	gi|16131480|ref|NP_418066.1| protein export chaperone [Escherichia coli str. K-12 substr. MG1655]
PKA_1.08526.08526.2.dta	2.8495	2	R.S*AELLDTMAHDYR.Q	gi|90111560|ref|NP_417700.2| conserved protein [Escherichia coli str. K-12 substr. MG1655]
PKA_1.08536.08536.3.dta	3.3799	3	-.MKT*LGEFIVEK.Q	gi|16132054|ref|NP_418653.1| fructose-1,6-bisphosphatase I [Escherichia coli str. K-12 substr. MG1655]
PKA_1.08539.08539.3.dta	3.7921	3	K.KAQIAELQS*FVSR.F	gi|16128788|ref|NP_415341.1| fused predicted transporter subunits of ABC superfamily: ATP-binding components [Escherichia coli str. K-12 substr. MG1655]
PKA_1.08545.08545.3.dta	3.3513	3	R.ILTGDKVTVELTPYDLS*KGR.I	gi|16128851|ref|NP_415404.1| translation initiation factor IF-1 [Escherichia coli str. K-12 substr. MG1655]
PKA_1.08568.08568.3.dta	3.3919	3	R.VVS*DKMEKS*IVVAIER.F	gi|16131190|ref|NP_417770.1| 30S ribosomal subunit protein S17 [Escherichia coli str. K-12 substr. MG1655]
PKA_1.08585.08585.2.dta	3.2948	2	R.AS*GGFAMLAVDQR.E	gi|16131721|ref|NP_418317.1| predicted aldolase [Escherichia coli str. K-12 substr. MG1655]
PKA_1.08586.08586.2.dta	3.4815	2	R.AADNKS*LGQFNLDGINPAPR.G	gi|16128008|ref|NP_414555.1| chaperone Hsp70, co-chaperone with DnaJ [Escherichia coli str. K-12 substr. MG1655]
PKA_1.08728.08728.2.dta	2.9609	2	R.RAAT*S*VKDANFVEEVEEE.-	gi|16130518|ref|NP_417088.1| cold shock protein associated with 30S ribosomal subunit [Escherichia coli str. K-12 substr. MG1655]
PKA_1.08746.08746.3.dta	3.2721	3	R.QDLNTLEKLS*YLR.R	gi|16129245|ref|NP_415800.1| predicted DNA-binding transcriptional regulator [Escherichia coli str. K-12 substr. MG1655]
PKA_1.08774.08774.2.dta	3.8865	2	R.HGT*WCTQWDYVADR.F	gi|16129580|ref|NP_416139.1| bifunctional beta-cystathionase, PLP-dependent/ regulator of maltose regulon [Escherichia coli str. K-12 substr. MG1655]
PKA_1.08816.08816.2.dta	3.3545	2	K.RAS*QLLDISLTK.R	gi|16130640|ref|NP_417213.1| methyl-directed mismatch repair protein [Escherichia coli str. K-12 substr. MG1655]
PKA_1.08820.08820.3.dta	3.3816	3	R.LLANRPES*ALAVTLAR.Q	gi|16128980|ref|NP_415534.1| fused DNA-binding transcriptional regulator/proline dehydrogenase/pyrroline-5-carboxylate dehydrogenase [Escherichia coli str. K-12 substr. MG1655]
PKA_1.08825.08825.2.dta	3.2888	2	-.MRTS*QYLLSTLK.E	gi|16128187|ref|NP_414736.1| prolyl-tRNA synthetase [Escherichia coli str. K-12 substr. MG1655]
PKA_1.08839.08839.2.dta	4.2286	2	R.RIS*NEESISAMFEH.-	gi|16129170|ref|NP_415725.1| phosphoribosylpyrophosphate synthase [Escherichia coli str. K-12 substr. MG1655]
PKA_1.08874.08874.2.dta	3.2321	2	R.RAQS*VVDYLISK.G	gi|16128924|ref|NP_415477.1| outer membrane protein A (3a;II*;G;d) [Escherichia coli str. K-12 substr. MG1655]
PKA_1.08897.08897.2.dta	2.8667	2	R.GTVS*LVEWHMAR.A	gi|16131662|ref|NP_418255.1| conserved protein [Escherichia coli str. K-12 substr. MG1655]
PKA_1.08901.08901.3.dta	3.444	3	K.AVS*HFRT*LDAAAALAAANK.R	gi|16131430|ref|NP_418016.1| glycine tRNA synthetase, beta subunit [Escherichia coli str. K-12 substr. MG1655]
PKA_1.08906.08906.3.dta	3.2053	3	K.GQLPT*RLWVAPPTR.M	gi|16128111|ref|NP_414660.1| bifunctional aconitate hydratase 2/2-methylisocitrate dehydratase [Escherichia coli str. K-12 substr. MG1655]
PKA_1.08911.08911.2.dta	2.9047	2	K.RGMS*LPMFGK.L	gi|16128496|ref|NP_415045.1| allantoinase [Escherichia coli str. K-12 substr. MG1655]
PKA_1.08951.08951.2.dta	2.9337	2	R.KLT*IPFVK.E	gi|16130421|ref|NP_416991.1| ATPase regulatory factor involved in DnaA inactivation [Escherichia coli str. K-12 substr. MG1655]
PKA_1.09027.09027.2.dta	3.1942	2	R.LKLAS*ILAK.L	gi|16130251|ref|NP_416819.1| acetyl-CoA carboxylase, beta (carboxyltranferase) subunit [Escherichia coli str. K-12 substr. MG1655]
PKA_1.09081.09081.2.dta	3.0085	2	R.LNFDQFKVS*VK.A	gi|16130440|ref|NP_417010.1| 1-hydroxy-2-methyl-2-(E)-butenyl 4-diphosphate synthase [Escherichia coli str. K-12 substr. MG1655]
PKA_1.09094.09094.2.dta	2.9067	2	K.HAVIALTS*IYGVGK.T	gi|16131177|ref|NP_417757.1| 30S ribosomal subunit protein S13 [Escherichia coli str. K-12 substr. MG1655]
PKA_1.09156.09156.2.dta	4.6409	2	K.AMDEQGKS*LDDFLIK.Q	gi|16129198|ref|NP_415753.1| global DNA-binding transcriptional dual regulator H-NS [Escherichia coli str. K-12 substr. MG1655]
PKA_1.09166.09166.2.dta	2.9468	2	-.MNKT*QLIDVIAEK.A	gi|16131830|ref|NP_418428.1| HU, DNA-binding transcriptional regulator, alpha subunit [Escherichia coli str. K-12 substr. MG1655]
PKA_1.09178.09178.2.dta	4.012	2	R.KPT*MLVTDLTLR.F	gi|16131780|ref|NP_418377.1| catalase/hydroperoxidase HPI(I) [Escherichia coli str. K-12 substr. MG1655]
PKA_1.09185.09185.3.dta	3.0226	3	-.MDDQLKQS*ALDFHEFPVPGK.I	gi|16130388|ref|NP_416958.1| fused malic enzyme predicted oxidoreductase/predicted phosphotransacetylase [Escherichia coli str. K-12 substr. MG1655]
PKA_1.09226.09226.3.dta	4.279	3	R.RVT*FLGFDAATEAR.Y	gi|90111415|ref|NP_416797.2| conserved protein [Escherichia coli str. K-12 substr. MG1655]
PKA_1.09232.09232.2.dta	3.5345	2	K.KVS*QALDILTYTNK.K	gi|16131194|ref|NP_417774.1| 50S ribosomal subunit protein L22 [Escherichia coli str. K-12 substr. MG1655]
PKA_1.09353.09353.3.dta	3.6048	3	K.RFGGES*VLAGSIIVR.Q	gi|16131075|ref|NP_417652.1| 50S ribosomal subunit protein L27 [Escherichia coli str. K-12 substr. MG1655]
PKA_1.09383.09383.2.dta	2.8065	2	K.HVFAS*LFNDR.A	gi|16129658|ref|NP_416217.1| phosphoenolpyruvate synthase [Escherichia coli str. K-12 substr. MG1655]
PKA_1.09481.09481.3.dta	3.1053	3	R.RPETEAVS*MLLEQAR.L	gi|16128980|ref|NP_415534.1| fused DNA-binding transcriptional regulator/proline dehydrogenase/pyrroline-5-carboxylate dehydrogenase [Escherichia coli str. K-12 substr. MG1655]
PKA_1.09483.09483.3.dta	3.9735	3	R.KWDMQFAPSICQQCS*IGCNISPGER.Y	gi|145698290|ref|NP_416786.4| NADH:ubiquinone oxidoreductase, chain G [Escherichia coli str. K-12 substr. MG1655]
PKA_1.09496.09496.3.dta	3.2768	3	R.ARVS*RPS*ADTIIGELSGM#AK.D	gi|49176329|ref|NP_417693.3| DNA-binding transcriptional dual regulator [Escherichia coli str. K-12 substr. MG1655]
PKA_1.09530.09530.2.dta	2.8612	2	R.KIS*WMEIYTGEK.S	gi|16129099|ref|NP_415654.1| e14 prophage; isocitrate dehydrogenase, specific for NADP+ [Escherichia coli str. K-12 substr. MG1655]
PKA_1.09580.09580.3.dta	3.0053	3	R.RGIGYLPQEAS*IFR.R	gi|16131091|ref|NP_417668.1| predicted transporter subunit: ATP-binding component of ABC superfamily [Escherichia coli str. K-12 substr. MG1655]
PKA_1.09598.09598.3.dta	3.5016	3	K.FCRFT*AEGVQEIDYKDIATLK.N	gi|16132024|ref|NP_418623.1| 30S ribosomal subunit protein S18 [Escherichia coli str. K-12 substr. MG1655]
PKA_1.09611.09611.3.dta	3.049	3	R.YCDS*VVCHINGYQGIQAALEK.K	gi|16130220|ref|NP_416788.1| NADH:ubiquinone oxidoreductase, chain E [Escherichia coli str. K-12 substr. MG1655]
PKA_1.09623.09623.3.dta	3.3657	3	K.NLITHQFAGGTIGNTMHNYS*VLADDR.S	gi|16128461|ref|NP_415010.1| inosine/guanosine kinase [Escherichia coli str. K-12 substr. MG1655]
PKA_1.09694.09694.3.dta	3.144	3	R.VLGRVT*AEDVLKPGTADILVPR.N	gi|16131818|ref|NP_418415.1| RNA polymerase, beta prime subunit [Escherichia coli str. K-12 substr. MG1655]
PKA_1.09739.09739.3.dta	3.3673	3	R.RAT*GLPVATNMIATNWR.E	gi|16130695|ref|NP_417268.1| predicted glucarate dehydratase [Escherichia coli str. K-12 substr. MG1655]
PKA_1.09752.09752.2.dta	3.3831	2	R.RPYS*VILLDEVEK.A	gi|16130513|ref|NP_417083.1| protein disaggregation chaperone [Escherichia coli str. K-12 substr. MG1655]
PKA_1.09793.09793.3.dta	3.514	3	R.RES*YVMPMNITEFCSK.L	gi|16130313|ref|NP_416882.1| predicted response regulator in two-component system withYpdA [Escherichia coli str. K-12 substr. MG1655]
PKA_1.09868.09868.3.dta	3.3088	3	K.S*RDDFGDMYEGLLQK.N	gi|16132170|ref|NP_418769.1| DNA methylase M [Escherichia coli str. K-12 substr. MG1655]
PKA_1.09879.09879.2.dta	2.9782	2	R.RPYS*VILLDEVEK.A	gi|16130513|ref|NP_417083.1| protein disaggregation chaperone [Escherichia coli str. K-12 substr. MG1655]
PKA_1.09881.09881.2.dta	3.4228	2	R.YIGS*LVADFHR.N	gi|16132054|ref|NP_418653.1| fructose-1,6-bisphosphatase I [Escherichia coli str. K-12 substr. MG1655]
PKA_1.10001.10001.3.dta	3.008	3	K.AKLT*LNGDTAVELDVLK.G	gi|16128695|ref|NP_415248.1| citrate synthase [Escherichia coli str. K-12 substr. MG1655]
PKA_1.10011.10011.3.dta	3.6117	3	R.YGAS*VRQDVLGDLMSR.N	gi|16128421|ref|NP_414970.1| peptidyl-prolyl cis/trans isomerase (trigger factor) [Escherichia coli str. K-12 substr. MG1655]
PKA_1.10045.10045.2.dta	3.6269	2	R.GYKLT*LTMPETMSIER.R	gi|16130340|ref|NP_416909.1| cysteine synthase A, O-acetylserine sulfhydrolase A subunit [Escherichia coli str. K-12 substr. MG1655]
PKA_1.10064.10064.3.dta	3.5029	3	R.S*VESYKFNGWELDINSR.S	gi|16132218|ref|NP_418818.1| DNA-binding response regulator in two-component regulatory system with ArcB or CpxA [Escherichia coli str. K-12 substr. MG1655]
PKA_1.10112.10112.2.dta	3.6716	2	K.HNPFLS*LVPEQGVK.L	gi|16128803|ref|NP_415356.1| predicted SAM-dependent methyltransferase [Escherichia coli str. K-12 substr. MG1655]
PKA_1.10204.10204.2.dta	2.7719	2	R.RFS*DIPIVMVTAK.I	gi|16130019|ref|NP_416583.1| DNA-binding response regulator in two-component regulatory system with BaeS [Escherichia coli str. K-12 substr. MG1655]
PKA_1.10233.10233.3.dta	4.4359	3	K.VNRDNIS*LDLGNNAEAVILR.E	gi|16131061|ref|NP_417638.1| transcription termination/antitermination L factor [Escherichia coli str. K-12 substr. MG1655]
PKA_1.10401.10401.3.dta	3.1875	3	R.APGS*DKWQQISWEEAFDR.I	gi|16131734|ref|NP_418330.1| formate dehydrogenase-O, large subunit [Escherichia coli str. K-12 substr. MG1655]
PKA_1.10412.10412.3.dta	3.4607	3	R.RAS*AGRIT*AVIPYFGYAR.Q	gi|16129170|ref|NP_415725.1| phosphoribosylpyrophosphate synthase [Escherichia coli str. K-12 substr. MG1655]
PKA_1.10422.10422.3.dta	4.3362	3	K.S*RDDLQAVMAMVR.G	gi|90111132|ref|NP_414960.2| predicted nucleotide binding protein [Escherichia coli str. K-12 substr. MG1655]
PKA_1.10487.10487.3.dta	3.7863	3	R.RWS*GEMSEIASGVLR.Q	gi|16128929|ref|NP_415482.1| DNA helicase IV [Escherichia coli str. K-12 substr. MG1655]
PKA_1.10495.10495.3.dta	4.0855	3	R.ELPHALISGGVSNVS*FSFR.G	gi|16131845|ref|NP_418443.1| homocysteine-N5-methyltetrahydrofolate transmethylase, B12-dependent [Escherichia coli str. K-12 substr. MG1655]
PKA_1.10500.10500.3.dta	4.1257	3	R.AQEVRLT*GLEGEQLGIVSLR.E	gi|16129674|ref|NP_416233.1| protein chain initiation factor IF-3 [Escherichia coli str. K-12 substr. MG1655]
PKA_1.10501.10501.3.dta	3.5017	3	R.GIIYHVDATQS*VGKLPIDLSQLK.V	gi|49176235|ref|YP_026169.1| cysteine desulfurase (tRNA sulfurtransferase), PLP-dependent [Escherichia coli str. K-12 substr. MG1655]
PKA_1.10561.10561.3.dta	4.2899	3	R.LSPLHS*VYVDQWDWER.V	gi|16131612|ref|NP_418200.1| asparagine synthetase A [Escherichia coli str. K-12 substr. MG1655]
PKA_1.10579.10579.3.dta	3.9788	3	K.VKNVLS*S*GKVIVEGINLVK.K	gi|16131188|ref|NP_417768.1| 50S ribosomal subunit protein L24 [Escherichia coli str. K-12 substr. MG1655]
PKA_1.10656.10656.3.dta	3.3218	3	K.RGGS*FIGLNPIHALYPANPESASPYSPSSR.R	gi|16131292|ref|NP_417875.1| 4-alpha-glucanotransferase (amylomaltase) [Escherichia coli str. K-12 substr. MG1655]
PKA_1.10723.10723.3.dta	3.1246	3	R.KT*GFDEIYLPFR.A	gi|16130393|ref|NP_416963.1| fused predicted oxidoreductase: FeS binding subunit/NAD/FAD-binding subunit [Escherichia coli str. K-12 substr. MG1655]
PKA_1.10769.10769.3.dta	3.8115	3	K.WFNES*KGFGFITPADGSK.D	gi|16129777|ref|NP_416337.1| stress protein, member of the CspA-family [Escherichia coli str. K-12 substr. MG1655]
PKA_1.10775.10775.3.dta	3.7678	3	K.IDEVFIGS*CMTNIGHFR.A	gi|16128111|ref|NP_414660.1| bifunctional aconitate hydratase 2/2-methylisocitrate dehydratase [Escherichia coli str. K-12 substr. MG1655]
PKA_1.10783.10783.4.dta	3.8193	4	R.KLS*LEPLIAHRGS*FESFAQAVR.D	gi|16130029|ref|NP_416594.1| galactitol-1-phosphate dehydrogenase, Zn-dependent and NAD(P)-binding [Escherichia coli str. K-12 substr. MG1655]
PKA_1.10861.10861.3.dta	3.2391	3	R.ERLT*GALEEAANEFR.R	gi|16130733|ref|NP_417306.1| fused PTS enzyme: PEP-protein phosphotransferase (enzyme I)/GAF domain containing protein [Escherichia coli str. K-12 substr. MG1655]
PKA_1.10879.10879.3.dta	3.0194	3	K.MPTMAAMCYKYS*IGQPFVYPR.N	gi|16128695|ref|NP_415248.1| citrate synthase [Escherichia coli str. K-12 substr. MG1655]
PKA_1.10958.10958.2.dta	3.3008	2	K.WKEGEATLAPS*LDLVGKI.-	gi|16128588|ref|NP_415138.1| alkyl hydroperoxide reductase, C22 subunit [Escherichia coli str. K-12 substr. MG1655]
PKA_1.10966.10966.3.dta	4.3939	3	K.VDAT*KQYDINEAIALLK.E	gi|16131814|ref|NP_418411.1| 50S ribosomal subunit protein L1 [Escherichia coli str. K-12 substr. MG1655]
PKA_1.11003.11003.3.dta	3.2745	3	K.VDAT*KQYDINEAIALLK.E	gi|16131814|ref|NP_418411.1| 50S ribosomal subunit protein L1 [Escherichia coli str. K-12 substr. MG1655]
PKA_1.11099.11099.3.dta	3.5816	3	R.SHNSGIIGPSAAS*FVADFR.A	gi|90111660|ref|NP_418320.2| predicted DNA-binding transcriptional regulator [Escherichia coli str. K-12 substr. MG1655]
PKA_1.11231.11231.4.dta	3.8457	4	K.VTGETNTDDLSPAPDAWS*RPDIPLHALAM#LK.N	gi|16128111|ref|NP_414660.1| bifunctional aconitate hydratase 2/2-methylisocitrate dehydratase [Escherichia coli str. K-12 substr. MG1655]
PKA_1.11232.11232.3.dta	3.8415	3	K.RGAS*AGEPIPMAGIPYHAVENYLAK.L	gi|16130640|ref|NP_417213.1| methyl-directed mismatch repair protein [Escherichia coli str. K-12 substr. MG1655]
PKA_1.11251.11251.3.dta	3.128	3	R.QQKS*KLENMFANMTEGEVHEVNIVLK.A	gi|16131060|ref|NP_417637.1| fused protein chain initiation factor 2, IF2: membrane protein/conserved protein [Escherichia coli str. K-12 substr. MG1655]
PKA_1.11360.11360.3.dta	3.1462	3	K.RGAS*AGEPIPMAGIPYHAVENYLAK.L	gi|16130640|ref|NP_417213.1| methyl-directed mismatch repair protein [Escherichia coli str. K-12 substr. MG1655]
PKA_1.11361.11361.3.dta	4.2705	3	R.AAGIHLVLATQRPS*VDVITGLIK.A	gi|16128857|ref|NP_415410.1| DNA-binding membrane protein required for chromosome resolution and partitioning [Escherichia coli str. K-12 substr. MG1655]
PKA_1.11409.11409.3.dta	3.0151	3	R.S*ANCLKAEAIHYIGDLVQR.T	gi|16131174|ref|NP_417754.1| RNA polymerase, alpha subunit [Escherichia coli str. K-12 substr. MG1655]
PKA_1.11484.11484.3.dta	3.1974	3	K.RFS*LSGWEPILVNK.T	gi|16131944|ref|NP_418542.1| DNA-binding transcriptional dual regulator [Escherichia coli str. K-12 substr. MG1655]
PKA_1.11514.11514.3.dta	4.1552	3	K.HGGFYLGS*IGGPAAVLAQGSIK.S	gi|16129570|ref|NP_416129.1| fumarate hydratase (fumarase A), aerobic Class I [Escherichia coli str. K-12 substr. MG1655]
PKA_1.11534.11534.3.dta	3.649	3	R.GREAQPAGNS*AMMDALAAAMGK.K	gi|90111588|ref|NP_417866.4| predicted transcriptional accessory protein [Escherichia coli str. K-12 substr. MG1655]
PKA_1.11540.11540.3.dta	3.4205	3	R.AGLADPNRPIGS*FLFLGPTGVGKTELCK.A	gi|16130513|ref|NP_417083.1| protein disaggregation chaperone [Escherichia coli str. K-12 substr. MG1655]
PKA_1.11555.11555.3.dta	3.9098	3	R.RS*T*IFPNMIGLTIAVHNGR.Q	gi|16131195|ref|NP_417775.1| 30S ribosomal subunit protein S19 [Escherichia coli str. K-12 substr. MG1655]
PKA_1.11557.11557.3.dta	3.4624	3	K.KYT*LPVLILTAR.D	gi|16131939|ref|NP_418537.1| DNA-binding response regulator in two-component regulatory system with BasS [Escherichia coli str. K-12 substr. MG1655]
PKA_1.11625.11625.4.dta	3.1315	4	K.RVQEVTASLSGVYELILVAAT*DGT*LAADVRPLVR.L	gi|16131134|ref|NP_417711.1| predicted peptidase [Escherichia coli str. K-12 substr. MG1655]
PKA_1.11642.11642.3.dta	3.2172	3	K.HGGFYLGS*IGGPAAVLAQGSIK.S	gi|16129570|ref|NP_416129.1| fumarate hydratase (fumarase A), aerobic Class I [Escherichia coli str. K-12 substr. MG1655]
PKA_1.11663.11663.2.dta	2.9237	2	K.RFS*LEGGDALIPMLK.E	gi|16128701|ref|NP_415254.1| 2-oxoglutarate decarboxylase, thiamin-requiring [Escherichia coli str. K-12 substr. MG1655]
PKA_1.11703.11703.3.dta	3.195	3	R.RS*T*IFPNMIGLTIAVHNGR.Q	gi|16131195|ref|NP_417775.1| 30S ribosomal subunit protein S19 [Escherichia coli str. K-12 substr. MG1655]
PKA_1.11892.11892.3.dta	3.1341	3	K.RLPT*IIDAPAQEFATIYVS*GGKR.G	gi|16128465|ref|NP_415014.1| conserved protein [Escherichia coli str. K-12 substr. MG1655]
PKA_1.11924.11924.2.dta	3.4174	2	R.HS*FISTLLGIK.H	gi|16130658|ref|NP_417231.1| sulfate adenylyltransferase, subunit 1 [Escherichia coli str. K-12 substr. MG1655]
PKA_1.12019.12019.3.dta	4.1171	3	R.DVS*FDLHKGEILGIAGLVGAK.R	gi|16130087|ref|NP_416654.1| fused methyl-galactoside transporter subunits of ABC superfamily: ATP-binding components [Escherichia coli str. K-12 substr. MG1655]
PKA_1.12084.12084.3.dta	3.1615	3	R.RFS*FIDIEPGFDTPQFR.N	gi|90111737|ref|NP_418766.4| 5-methylcytosine-specific restriction enzyme McrBC, subunit McrB [Escherichia coli str. K-12 substr. MG1655]
PKA_1.12124.12124.3.dta	3.1692	3	K.TKENLGS*GFISLFR.G	gi|16131336|ref|NP_417921.1| fused Signal Recognition Particle (SRP) receptor: membrane binding protein/conserved protein [Escherichia coli str. K-12 substr. MG1655]
PKA_1.12155.12155.2.dta	3.9723	2	R.ANVS*QVMHIIGDVAGR.D	gi|16129170|ref|NP_415725.1| phosphoribosylpyrophosphate synthase [Escherichia coli str. K-12 substr. MG1655]
PKA_1.12193.12193.4.dta	3.0831	4	K.VDRS*FGDIPLVHGM#PFISGIGIEALQNK.I	gi|16130031|ref|NP_416596.1| galactitol-specific enzyme IIB component of PTS [Escherichia coli str. K-12 substr. MG1655]
PKA_1.12196.12196.3.dta	3.5705	3	K.AGEHIGICSVCS*AHPLVIEAALAFDR.N	gi|16130033|ref|NP_416598.1| D-tagatose 1,6-bisphosphate aldolase 2, subunit [Escherichia coli str. K-12 substr. MG1655]
PKA_1.12208.12208.3.dta	3.2701	3	R.RNT*VGDNLDDLVTILR.E	gi|16130184|ref|NP_416752.1| conserved protein [Escherichia coli str. K-12 substr. MG1655]
PKA_1.12227.12227.3.dta	3.2079	3	R.RLT*WGETWEGALDEIR.A	gi|16130774|ref|NP_417348.1| predicted peptidase [Escherichia coli str. K-12 substr. MG1655]
PKA_1.12261.12261.2.dta	3.6022	2	R.VIKES*LWQELADITDK.T	gi|16128626|ref|NP_415176.1| conserved protein [Escherichia coli str. K-12 substr. MG1655]
PKA_1.12315.12315.3.dta	3.557	3	R.LKGNT*GENLLALLEGR.L	gi|16131175|ref|NP_417755.1| 30S ribosomal subunit protein S4 [Escherichia coli str. K-12 substr. MG1655]
PKA_1.12321.12321.3.dta	3.5672	3	R.FKMPIITFIDTPGAYPGVGAEERGQS*EAIAR.N	gi|16128178|ref|NP_414727.1| acetyl-CoA carboxylase, carboxytransferase, alpha subunit [Escherichia coli str. K-12 substr. MG1655]
PKA_1.12373.12373.3.dta	3.3911	3	R.INEDGKLT*LVNHLGIDLGETPEQILSK.L	gi|16130071|ref|NP_416637.1| D-lactate dehydrogenase, FAD-binding, NADH independent [Escherichia coli str. K-12 substr. MG1655]
PKA_1.12386.12386.3.dta	3.4294	3	R.IFDFGKNS*VVPTGFGWLGNK.G	gi|90111658|ref|NP_418316.4| predicted glucosamine isomerase [Escherichia coli str. K-12 substr. MG1655]
PKA_1.12397.12397.2.dta	3.277	2	R.GALKS*ILSELVR.Q	gi|16131198|ref|NP_417778.1| 50S ribosomal subunit protein L4 [Escherichia coli str. K-12 substr. MG1655]
PKA_1.12405.12405.3.dta	4.4952	3	R.NLRVS*EIIGQVWR.A	gi|16130442|ref|NP_417012.1| predicted enzyme [Escherichia coli str. K-12 substr. MG1655]
PKA_1.12416.12416.3.dta	3.3833	3	R.WRS*NDVSLPILVLTAR.E	gi|16129093|ref|NP_415648.1| DNA-binding response regulator in two-component regulatory system with PhoQ [Escherichia coli str. K-12 substr. MG1655]
PKA_1.12430.12430.3.dta	4.0785	3	R.FRQS*LGGLIEAYEAVAR.R	gi|16130401|ref|NP_416971.1| phosphoribosylaminoimidazole-succinocarboxamide synthetase [Escherichia coli str. K-12 substr. MG1655]
PKA_1.12433.12433.3.dta	3.9812	3	R.LHS*LLDEGSLVELGSELEPKDVLK.F	gi|16130251|ref|NP_416819.1| acetyl-CoA carboxylase, beta (carboxyltranferase) subunit [Escherichia coli str. K-12 substr. MG1655]
PKA_1.12519.12519.3.dta	4.384	3	K.LGS*QFHIPHGLANALLICNVIR.Y	gi|16129202|ref|NP_415757.1| fused acetaldehyde-CoA dehydrogenase/iron-dependent alcohol dehydrogenase/pyruvate-formate lyase deactivase [Escherichia coli str. K-12 substr. MG1655]
PKA_1.12557.12557.3.dta	5.4479	3	K.AKLT*LNGDTAVELDVLKGTLGQDVIDIR.T	gi|16128695|ref|NP_415248.1| citrate synthase [Escherichia coli str. K-12 substr. MG1655]
PKA_1.12570.12570.3.dta	3.2652	3	R.ALLNS*MVIGVTEGFTKK.L	gi|16131184|ref|NP_417764.1| 50S ribosomal subunit protein L6 [Escherichia coli str. K-12 substr. MG1655]
PKA_1.12574.12574.3.dta	4.0399	3	R.AKLES*LVEDLVNR.S	gi|16128008|ref|NP_414555.1| chaperone Hsp70, co-chaperone with DnaJ [Escherichia coli str. K-12 substr. MG1655]
PKA_1r.00311.00311.2.dta	2.5916	2	R.AVS*AAKPK.V	gi|16131073|ref|NP_417650.1| GTPase involved in cell partioning and DNA repair [Escherichia coli str. K-12 substr. MG1655]
PKA_1r.00386.00386.2.dta	2.5938	2	K.AKVS*ATGDDAR.E	gi|49176395|ref|YP_026241.1| DNA gyrase, subunit B [Escherichia coli str. K-12 substr. MG1655]
PKA_1r.00390.00390.2.dta	2.3069	2	R.ALS*NHENDNQQQR.I	gi|16128891|ref|NP_415444.1| fused chromosome partitioning protein: predicted nucleotide hydrolase/conserved protein/conserved protein [Escherichia coli str. K-12 substr. MG1655]
PKA_1r.00445.00445.2.dta	2.7964	2	K.GNRS*QQVTDACK.K	gi|16129570|ref|NP_416129.1| fumarate hydratase (fumarase A), aerobic Class I [Escherichia coli str. K-12 substr. MG1655]
PKA_1r.00556.00556.2.dta	3.4351	2	R.LHS*QGNLSQTNNSK.D	gi|16129041|ref|NP_415596.1| flagellar component of cell-distal portion of basal-body rod [Escherichia coli str. K-12 substr. MG1655]
PKA_1r.00599.00599.2.dta	2.7304	2	K.S*VAAVGHDAK.Q	gi|90111564|ref|NP_417717.2| cell wall structural complex MreBCD, actin-like component MreB [Escherichia coli str. K-12 substr. MG1655]
PKA_1r.00816.00816.2.dta	2.5522	2	R.KIS*NGEGVER.V	gi|16130527|ref|NP_417097.1| 50S ribosomal subunit protein L19 [Escherichia coli str. K-12 substr. MG1655]
PKA_1r.00945.00945.2.dta	2.6512	2	R.VMVS*GTGHTGK.I	gi|16129500|ref|NP_416059.1| conserved protein [Escherichia coli str. K-12 substr. MG1655]
PKA_1r.00969.00969.2.dta	2.9236	2	K.AKVS*TATVSR.A	gi|16131772|ref|NP_418369.1| DNA-binding transcriptional dual regulator [Escherichia coli str. K-12 substr. MG1655]
PKA_1r.00995.00995.2.dta	2.8607	2	-.M#KT*AYIAK.Q	gi|16131612|ref|NP_418200.1| asparagine synthetase A [Escherichia coli str. K-12 substr. MG1655]
PKA_1r.01004.01004.2.dta	2.319	2	R.KVT*TLTR.S	gi|16131307|ref|NP_417891.1| aspartate-semialdehyde dehydrogenase, NAD(P)-binding [Escherichia coli str. K-12 substr. MG1655]
PKA_1r.01023.01023.2.dta	2.9735	2	R.RMT*GDNPDAPR.W	gi|16129375|ref|NP_415932.1| conserved protein [Escherichia coli str. K-12 substr. MG1655]
PKA_1r.01054.01054.2.dta	2.379	2	R.S*HPAGALGAR.L	gi|90111480|ref|NP_417188.4| predicted phosphosugar-binding protein [Escherichia coli str. K-12 substr. MG1655]
PKA_1r.01093.01093.2.dta	2.3182	2	R.SKIAS*VQNTQK.I	gi|16131601|ref|NP_418189.1| F1 sector of membrane-bound ATP synthase, gamma subunit [Escherichia coli str. K-12 substr. MG1655]
PKA_1r.01119.01119.2.dta	2.5604	2	R.LTQYS*HGAGCGCK.I	gi|16129718|ref|NP_416278.1| selenophosphate synthase [Escherichia coli str. K-12 substr. MG1655]
PKA_1r.01148.01148.2.dta	3.4371	2	K.KAS*AIVTNR.G	gi|16129658|ref|NP_416217.1| phosphoenolpyruvate synthase [Escherichia coli str. K-12 substr. MG1655]
PKA_1r.01150.01150.2.dta	2.6926	2	R.GKS*VDIDR.A	gi|16129261|ref|NP_415816.1| gamma-Glu-gamma-aminobutyraldehyde dehydrogenase, NAD(P)H-dependent [Escherichia coli str. K-12 substr. MG1655]
PKA_1r.01163.01163.2.dta	3.124	2	R.TVS*RAPGDETPEK.A	gi|16130506|ref|NP_417076.1| predicted methyltransferase [Escherichia coli str. K-12 substr. MG1655]
PKA_1r.01192.01192.2.dta	3.0547	2	R.KMT*EIAQK.L	gi|90111290|ref|NP_416048.2| DNA-binding transcriptional dual activator of multiple antibiotic resistance [Escherichia coli str. K-12 substr. MG1655]
PKA_1r.01196.01196.2.dta	2.3403	2	R.S*GMHQDVPK.E	gi|16128509|ref|NP_415058.1| peptidyl-prolyl cis-trans isomerase B (rotamase B) [Escherichia coli str. K-12 substr. MG1655]
PKA_1r.01213.01213.2.dta	3.7533	2	R.AKAS*QLDEAR.R	gi|16130440|ref|NP_417010.1| 1-hydroxy-2-methyl-2-(E)-butenyl 4-diphosphate synthase [Escherichia coli str. K-12 substr. MG1655]
PKA_1r.01349.01349.2.dta	2.6272	2	R.AM#S*EIGHCADCR.T	gi|16128456|ref|NP_415005.1| gap repair protein [Escherichia coli str. K-12 substr. MG1655]
PKA_1r.01359.01359.2.dta	3.1303	2	K.HAVT*EASPM#VK.A	gi|221800783|ref|NP_418621.2| 30S ribosomal subunit protein S6 [Escherichia coli str. K-12 substr. MG1655]
PKA_1r.01380.01380.2.dta	2.5938	2	R.IKS*NITPTR.K	gi|16130251|ref|NP_416819.1| acetyl-CoA carboxylase, beta (carboxyltranferase) subunit [Escherichia coli str. K-12 substr. MG1655]
PKA_1r.01401.01401.2.dta	2.5942	2	R.LNS*LGHPR.I	gi|16131572|ref|NP_418159.1| protein C5 component of RNase P [Escherichia coli str. K-12 substr. MG1655]
PKA_1r.01430.01430.2.dta	2.9171	2	K.KAS*VEIDR.K	gi|16129672|ref|NP_416231.1| 50S ribosomal subunit protein L20 [Escherichia coli str. K-12 substr. MG1655]
PKA_1r.01435.01435.2.dta	3.3447	2	K.ATHADS*AVNVTK.F	gi|16130898|ref|NP_417472.1| predicted protein [Escherichia coli str. K-12 substr. MG1655]
PKA_1r.01500.01500.2.dta	2.5686	2	K.ALSNNM#TRDT*LNR.A	gi|16129817|ref|NP_416378.1| conserved protein [Escherichia coli str. K-12 substr. MG1655]
PKA_1r.01510.01510.2.dta	3.2518	2	K.RKT*T*LAPNTQTASPR.A	gi|49176012|ref|NP_414879.3| DNA-binding transcriptional repressor [Escherichia coli str. K-12 substr. MG1655]
PKA_1r.01526.01526.2.dta	2.5037	2	K.ALGHGDGKS*ASSY.-	gi|16132198|ref|NP_418798.1| 2-deoxyribose-5-phosphate aldolase, NAD(P)-linked [Escherichia coli str. K-12 substr. MG1655]
PKA_1r.01539.01539.2.dta	3.3088	2	K.GRS*QGVAAYGAK.E	gi|145698291|ref|NP_416789.2| NADH:ubiquinone oxidoreductase, chain C,D [Escherichia coli str. K-12 substr. MG1655]
PKA_1r.01546.01546.2.dta	2.672	2	K.HAVT*EASPM#VK.A	gi|221800783|ref|NP_418621.2| 30S ribosomal subunit protein S6 [Escherichia coli str. K-12 substr. MG1655]
PKA_1r.01553.01553.2.dta	2.513	2	K.VKNVLSS*GK.V	gi|16131188|ref|NP_417768.1| 50S ribosomal subunit protein L24 [Escherichia coli str. K-12 substr. MG1655]
PKA_1r.01561.01561.2.dta	2.3347	2	R.AKS*GVLMK.S	gi|90111573|ref|NP_417805.4| predicted DNA-binding transcriptional regulator [Escherichia coli str. K-12 substr. MG1655]
PKA_1r.01593.01593.2.dta	2.3426	2	R.KGS*FNGM#VAR.T	gi|16131581|ref|NP_418169.1| chromate reductase, Class I, flavoprotein [Escherichia coli str. K-12 substr. MG1655]
PKA_1r.01609.01609.2.dta	2.9161	2	R.HVS*SCGCNIEDSR.L	gi|90111443|ref|NP_416974.4| DNA-binding transcriptional repressor, regulatory protein accessory to GcvA [Escherichia coli str. K-12 substr. MG1655]
PKA_1r.01653.01653.2.dta	2.661	2	R.M#S*GVYVTSHEGK.E	gi|90111392|ref|NP_416629.4| predicted response regulator in two-component system withYehU [Escherichia coli str. K-12 substr. MG1655]
PKA_1r.01654.01654.2.dta	2.6648	2	R.LNT*LSPAEGSKK.A	gi|16131180|ref|NP_417760.1| 50S ribosomal subunit protein L15 [Escherichia coli str. K-12 substr. MG1655]
PKA_1r.01681.01681.2.dta	2.4053	2	K.M#AVKGS*QVIK.A	gi|16131060|ref|NP_417637.1| fused protein chain initiation factor 2, IF2: membrane protein/conserved protein [Escherichia coli str. K-12 substr. MG1655]
PKA_1r.01726.01726.2.dta	2.4584	2	-.MKT*AYIAK.Q	gi|16131612|ref|NP_418200.1| asparagine synthetase A [Escherichia coli str. K-12 substr. MG1655]
PKA_1r.01729.01729.2.dta	2.7663	2	R.SGDT*YLHR.I	gi|16130501|ref|NP_417071.1| ATP-dependent RNA helicase [Escherichia coli str. K-12 substr. MG1655]
PKA_1r.01738.01738.2.dta	3.5242	2	K.GHSS*AQYSGEIK.G	gi|16129141|ref|NP_415696.1| predicted protein [Escherichia coli str. K-12 substr. MG1655]
PKA_1r.01800.01800.2.dta	2.4363	2	K.VKNVLS*SGK.V	gi|16131188|ref|NP_417768.1| 50S ribosomal subunit protein L24 [Escherichia coli str. K-12 substr. MG1655]
PKA_1r.01803.01803.2.dta	2.6404	2	R.AQS*LKEIK.G	gi|16128020|ref|NP_414567.1| isoleucyl-tRNA synthetase [Escherichia coli str. K-12 substr. MG1655]
PKA_1r.01815.01815.2.dta	2.4341	2	R.NM#AGS*LVR.H	gi|16131173|ref|NP_417753.1| 50S ribosomal subunit protein L17 [Escherichia coli str. K-12 substr. MG1655]
PKA_1r.01852.01852.2.dta	2.6164	2	R.GALDCS*GVKDR.K	gi|16131221|ref|NP_417801.1| 30S ribosomal subunit protein S12 [Escherichia coli str. K-12 substr. MG1655]
PKA_1r.01860.01860.2.dta	3.2539	2	R.S*GQAETLADHEGR.H	gi|16130451|ref|NP_417021.1| DnaK-like molecular chaperone specific for IscU [Escherichia coli str. K-12 substr. MG1655]
PKA_1r.01920.01920.2.dta	2.732	2	-.MRS*S*AKQEELVK.A	gi|16131127|ref|NP_417704.1| DNA-binding transcriptional dual regulator, L-arginine-binding [Escherichia coli str. K-12 substr. MG1655]
PKA_1r.01926.01926.2.dta	2.6957	2	R.LHT*VLER.L	gi|16131769|ref|NP_418366.1| molecular chaperone and ATPase component of HslUV protease [Escherichia coli str. K-12 substr. MG1655]
PKA_1r.01942.01942.2.dta	2.9496	2	R.LGETGDAIAKQT*R.V	gi|16130993|ref|NP_417569.1| conserved protein [Escherichia coli str. K-12 substr. MG1655]
PKA_1r.01978.01978.2.dta	2.7603	2	R.RKPS*GTGVPPQTTEE.-	gi|16130501|ref|NP_417071.1| ATP-dependent RNA helicase [Escherichia coli str. K-12 substr. MG1655]
PKA_1r.01993.01993.2.dta	2.7297	2	K.TKS*DLPESVK.H	gi|16129180|ref|NP_415735.1| predicted cation regulator [Escherichia coli str. K-12 substr. MG1655]
PKA_1r.02015.02015.2.dta	2.3358	2	R.VAKS*QVVIEK.G	gi|90111518|ref|NP_417428.2| conserved protein [Escherichia coli str. K-12 substr. MG1655]
PKA_1r.02016.02016.2.dta	2.4684	2	R.GVRS*AQELER.S	gi|16130794|ref|NP_417368.1| ssDNA exonuclease, 5' --> 3'-specific [Escherichia coli str. K-12 substr. MG1655]
PKA_1r.02019.02019.2.dta	2.3344	2	R.HGAS*NVTCAYR.R	gi|16130393|ref|NP_416963.1| fused predicted oxidoreductase: FeS binding subunit/NAD/FAD-binding subunit [Escherichia coli str. K-12 substr. MG1655]
PKA_1r.02026.02026.3.dta	3.9681	3	R.HGAS*CPVGM#GVSCSADR.N	gi|16129570|ref|NP_416129.1| fumarate hydratase (fumarase A), aerobic Class I [Escherichia coli str. K-12 substr. MG1655]
PKA_1r.02026.02026.3.dta	3.9681	3	R.HGAS*CPVGM#GVSCSADR.N	gi|16131948|ref|NP_418546.1| anaerobic class I fumarate hydratase (fumarase B) [Escherichia coli str. K-12 substr. MG1655]
PKA_1r.02039.02039.2.dta	2.9458	2	K.MEKVS*AGYGDR.I	gi|16131231|ref|NP_417811.1| fused predicted transporter subunits of ABC superfamily: ATP-binding components [Escherichia coli str. K-12 substr. MG1655]
PKA_1r.02067.02067.2.dta	2.5028	2	R.NNS*AQLEHEATTSR.I	gi|90111315|ref|NP_416198.2| component of SufBCD complex [Escherichia coli str. K-12 substr. MG1655]
PKA_1r.02127.02127.2.dta	3.5499	2	K.KCT*GASPSEFR.A	gi|16128058|ref|NP_414606.1| DNA-binding transcriptional dual regulator [Escherichia coli str. K-12 substr. MG1655]
PKA_1r.02147.02147.2.dta	2.341	2	R.KAS*EISIK.A	gi|16132198|ref|NP_418798.1| 2-deoxyribose-5-phosphate aldolase, NAD(P)-linked [Escherichia coli str. K-12 substr. MG1655]
PKA_1r.02309.02309.2.dta	2.6162	2	R.KST*ILPR.V	gi|90111113|ref|NP_414842.4| predicted transporter [Escherichia coli str. K-12 substr. MG1655]
PKA_1r.02332.02332.2.dta	3.4002	2	K.HAVT*EASPMVK.A	gi|221800783|ref|NP_418621.2| 30S ribosomal subunit protein S6 [Escherichia coli str. K-12 substr. MG1655]
PKA_1r.02333.02333.2.dta	2.5921	2	R.IEQMLS*QDKR.I	gi|16131597|ref|NP_418185.1| L-glutamine:D-fructose-6-phosphate aminotransferase [Escherichia coli str. K-12 substr. MG1655]
PKA_1r.02353.02353.2.dta	2.5777	2	-.MNKS*QLIDK.I	gi|16128425|ref|NP_414974.1| HU, DNA-binding transcriptional regulator, beta subunit [Escherichia coli str. K-12 substr. MG1655]
PKA_1r.02377.02377.2.dta	2.565	2	R.KAS*MVLR.L	gi|16129199|ref|NP_415754.1| thymidine kinase/deoxyuridine kinase [Escherichia coli str. K-12 substr. MG1655]
PKA_1r.02380.02380.2.dta	2.4864	2	R.VKT*LLNDK.G	gi|16129669|ref|NP_416228.1| phenylalanine tRNA synthetase, beta subunit [Escherichia coli str. K-12 substr. MG1655]
PKA_1r.02385.02385.2.dta	2.7655	2	R.GRS*MDSVM#AQYQK.T	gi|90111379|ref|NP_416570.2| uridine/cytidine kinase [Escherichia coli str. K-12 substr. MG1655]
PKA_1r.02386.02386.2.dta	2.3434	2	K.RGT*LDLSK.L	gi|90111550|ref|NP_417631.2| ATP-dependent RNA helicase [Escherichia coli str. K-12 substr. MG1655]
PKA_1r.02400.02400.2.dta	2.7179	2	K.KQT*EDYITGR.Y	gi|16131593|ref|NP_418181.1| phosphate transporter subunit [Escherichia coli str. K-12 substr. MG1655]
PKA_1r.02405.02405.2.dta	3.57	2	K.GKS*LDEAQAIK.N	gi|16130454|ref|NP_417024.1| scaffold protein [Escherichia coli str. K-12 substr. MG1655]
PKA_1r.02409.02409.2.dta	2.6061	2	K.LQTLPRDS*SPS*R.Q	gi|16131186|ref|NP_417766.1| 30S ribosomal subunit protein S14 [Escherichia coli str. K-12 substr. MG1655]
PKA_1r.02430.02430.2.dta	4.1242	2	R.RSS*EVYGQTNIGGK.G	gi|16131764|ref|NP_418361.1| glycerol kinase [Escherichia coli str. K-12 substr. MG1655]
PKA_1r.02468.02468.2.dta	2.3255	2	K.YS*YVDENGETK.T	gi|16129198|ref|NP_415753.1| global DNA-binding transcriptional dual regulator H-NS [Escherichia coli str. K-12 substr. MG1655]
PKA_1r.02479.02479.2.dta	4.2636	2	R.KT*VVADGVGQGYK.E	gi|16128156|ref|NP_414705.1| conserved protein [Escherichia coli str. K-12 substr. MG1655]
PKA_1r.02485.02485.2.dta	2.326	2	R.RT*ELDIEK.A	gi|16130533|ref|NP_417104.1| heat shock protein [Escherichia coli str. K-12 substr. MG1655]
PKA_1r.02490.02490.2.dta	2.7745	2	R.VKT*LLNEK.A	gi|16131191|ref|NP_417771.1| 50S ribosomal subunit protein L29 [Escherichia coli str. K-12 substr. MG1655]
PKA_1r.02533.02533.2.dta	2.9288	2	R.KQT*EQALLK.L	gi|16131654|ref|NP_418246.1| predicted protoheme IX synthesis protein [Escherichia coli str. K-12 substr. MG1655]
PKA_1r.02536.02536.2.dta	3.2354	2	R.VNQS*DISDAQIKK.I	gi|16130966|ref|NP_417542.1| predicted transcriptional regulator [Escherichia coli str. K-12 substr. MG1655]
PKA_1r.02598.02598.2.dta	2.7628	2	R.RET*LEDAVK.H	gi|16130504|ref|NP_417074.1| pyruvate formate lyase subunit [Escherichia coli str. K-12 substr. MG1655]
PKA_1r.02605.02605.2.dta	3.0819	2	K.AGKT*ITLEDGR.Q	gi|90111412|ref|NP_416771.4| binuclear zinc phosphodiesterase [Escherichia coli str. K-12 substr. MG1655]
PKA_1r.02610.02610.2.dta	3.4053	2	K.SKS*VQIEVR.K	gi|16131060|ref|NP_417637.1| fused protein chain initiation factor 2, IF2: membrane protein/conserved protein [Escherichia coli str. K-12 substr. MG1655]
PKA_1r.02618.02618.2.dta	3.0627	2	R.AGQS*FSSGNYQHVK.L	gi|16131938|ref|NP_418536.1| sensory histidine kinase in two-component regulatory system with BasR [Escherichia coli str. K-12 substr. MG1655]
PKA_1r.02642.02642.2.dta	2.9242	2	K.LIAVNRVS*K.T	gi|16131182|ref|NP_417762.1| 30S ribosomal subunit protein S5 [Escherichia coli str. K-12 substr. MG1655]
PKA_1r.02653.02653.2.dta	2.591	2	R.KLS*YTGEVK.A	gi|16128002|ref|NP_414549.1| transaldolase B [Escherichia coli str. K-12 substr. MG1655]
PKA_1r.02676.02676.2.dta	2.8129	2	R.KAGS*SDIVDVK.Q	gi|16130692|ref|NP_417265.1| 23S rRNA (uracil-5)-methyltransferase [Escherichia coli str. K-12 substr. MG1655]
PKA_1r.02702.02702.2.dta	2.4543	2	R.VPLHT*LR.A	gi|16131193|ref|NP_417773.1| 30S ribosomal subunit protein S3 [Escherichia coli str. K-12 substr. MG1655]
PKA_1r.02743.02743.2.dta	3.5413	2	R.KIT*AAPVVDENGK.L	gi|90111480|ref|NP_417188.4| predicted phosphosugar-binding protein [Escherichia coli str. K-12 substr. MG1655]
PKA_1r.02754.02754.2.dta	2.7673	2	K.SKS*VQIEVR.K	gi|16131060|ref|NP_417637.1| fused protein chain initiation factor 2, IF2: membrane protein/conserved protein [Escherichia coli str. K-12 substr. MG1655]
PKA_1r.02804.02804.2.dta	2.5377	2	R.HQS*TLPLR.A	gi|16129770|ref|NP_416330.1| fused predicted membrane protein/conserved protein [Escherichia coli str. K-12 substr. MG1655]
PKA_1r.02819.02819.2.dta	2.6352	2	R.TLVTKNS*FR.Y	gi|16128870|ref|NP_415423.1| pyruvate formate lyase I [Escherichia coli str. K-12 substr. MG1655]
PKA_1r.02819.02819.2.dta	2.6352	2	R.TLVTKNS*FR.Y	gi|49176316|ref|YP_026205.1| pyruvate formate-lyase 4/2-ketobutyrate formate-lyase [Escherichia coli str. K-12 substr. MG1655]
PKA_1r.02849.02849.2.dta	2.9111	2	R.AKAS*AQLETIK.T	gi|16130342|ref|NP_416911.1| PEP-protein phosphotransferase of PTS system (enzyme I) [Escherichia coli str. K-12 substr. MG1655]
PKA_1r.02859.02859.2.dta	2.8748	2	K.GGGIS*GQAGAIR.H	gi|16131120|ref|NP_417697.1| 30S ribosomal subunit protein S9 [Escherichia coli str. K-12 substr. MG1655]
PKA_1r.02907.02907.2.dta	2.3877	2	R.TLVTKNS*FR.Y	gi|16128870|ref|NP_415423.1| pyruvate formate lyase I [Escherichia coli str. K-12 substr. MG1655]
PKA_1r.02907.02907.2.dta	2.3877	2	R.TLVTKNS*FR.Y	gi|49176316|ref|YP_026205.1| pyruvate formate-lyase 4/2-ketobutyrate formate-lyase [Escherichia coli str. K-12 substr. MG1655]
PKA_1r.02910.02910.3.dta	3.0595	3	R.VARGS*GNIASAPAMSR.R	gi|16129932|ref|NP_416495.1| nicotinate-nucleotide dimethylbenzimidazole-P phophoribosyl transferase [Escherichia coli str. K-12 substr. MG1655]
PKA_1r.02931.02931.2.dta	2.6565	2	R.AKAS*AQLETIK.T	gi|16130342|ref|NP_416911.1| PEP-protein phosphotransferase of PTS system (enzyme I) [Escherichia coli str. K-12 substr. MG1655]
PKA_1r.02938.02938.2.dta	2.8867	2	K.GGGIS*GQAGAIR.H	gi|16131120|ref|NP_417697.1| 30S ribosomal subunit protein S9 [Escherichia coli str. K-12 substr. MG1655]
PKA_1r.02987.02987.2.dta	2.4647	2	R.TLVTKNS*FR.Y	gi|16128870|ref|NP_415423.1| pyruvate formate lyase I [Escherichia coli str. K-12 substr. MG1655]
PKA_1r.02987.02987.2.dta	2.4647	2	R.TLVTKNS*FR.Y	gi|49176316|ref|YP_026205.1| pyruvate formate-lyase 4/2-ketobutyrate formate-lyase [Escherichia coli str. K-12 substr. MG1655]
PKA_1r.02988.02988.2.dta	2.4982	2	-.MKT*LIAR.H	gi|16130033|ref|NP_416598.1| D-tagatose 1,6-bisphosphate aldolase 2, subunit [Escherichia coli str. K-12 substr. MG1655]
PKA_1r.03012.03012.2.dta	2.6891	2	K.LKS*EFVK.K	gi|16131934|ref|NP_418532.1| conserved protein [Escherichia coli str. K-12 substr. MG1655]
PKA_1r.03019.03019.2.dta	2.4315	2	K.GGGIS*GQAGAIR.H	gi|16131120|ref|NP_417697.1| 30S ribosomal subunit protein S9 [Escherichia coli str. K-12 substr. MG1655]
PKA_1r.03027.03027.2.dta	2.5591	2	R.DHT*LFAK.A	gi|16131075|ref|NP_417652.1| 50S ribosomal subunit protein L27 [Escherichia coli str. K-12 substr. MG1655]
PKA_1r.03061.03061.2.dta	2.489	2	R.TLVTKNS*FR.Y	gi|16128870|ref|NP_415423.1| pyruvate formate lyase I [Escherichia coli str. K-12 substr. MG1655]
PKA_1r.03061.03061.2.dta	2.489	2	R.TLVTKNS*FR.Y	gi|49176316|ref|YP_026205.1| pyruvate formate-lyase 4/2-ketobutyrate formate-lyase [Escherichia coli str. K-12 substr. MG1655]
PKA_1r.03081.03081.2.dta	3.127	2	R.AKAS*AQLETIK.T	gi|16130342|ref|NP_416911.1| PEP-protein phosphotransferase of PTS system (enzyme I) [Escherichia coli str. K-12 substr. MG1655]
PKA_1r.03082.03082.2.dta	2.5998	2	R.LGVSHT*AIANK.L	gi|16129284|ref|NP_415839.1| DNA-binding transcriptional dual regulator, tyrosine-binding [Escherichia coli str. K-12 substr. MG1655]
PKA_1r.03092.03092.2.dta	2.8102	2	R.DHT*LFAK.A	gi|16131075|ref|NP_417652.1| 50S ribosomal subunit protein L27 [Escherichia coli str. K-12 substr. MG1655]
PKA_1r.03128.03128.2.dta	2.793	2	R.TLVTKNS*FR.Y	gi|16128870|ref|NP_415423.1| pyruvate formate lyase I [Escherichia coli str. K-12 substr. MG1655]
PKA_1r.03128.03128.2.dta	2.793	2	R.TLVTKNS*FR.Y	gi|49176316|ref|YP_026205.1| pyruvate formate-lyase 4/2-ketobutyrate formate-lyase [Escherichia coli str. K-12 substr. MG1655]
PKA_1r.03144.03144.2.dta	2.6356	2	R.AKAS*AQLETIK.T	gi|16130342|ref|NP_416911.1| PEP-protein phosphotransferase of PTS system (enzyme I) [Escherichia coli str. K-12 substr. MG1655]
PKA_1r.03152.03152.2.dta	2.543	2	R.HLES*VVTNK.I	gi|16128156|ref|NP_414705.1| conserved protein [Escherichia coli str. K-12 substr. MG1655]
PKA_1r.03155.03155.2.dta	2.742	2	R.DHT*LFAK.A	gi|16131075|ref|NP_417652.1| 50S ribosomal subunit protein L27 [Escherichia coli str. K-12 substr. MG1655]
PKA_1r.03209.03209.2.dta	2.6517	2	K.LKS*EFVK.K	gi|16131934|ref|NP_418532.1| conserved protein [Escherichia coli str. K-12 substr. MG1655]
PKA_1r.03210.03210.2.dta	2.3498	2	R.AKAS*AQLETIK.T	gi|16130342|ref|NP_416911.1| PEP-protein phosphotransferase of PTS system (enzyme I) [Escherichia coli str. K-12 substr. MG1655]
PKA_1r.03220.03220.2.dta	2.6667	2	R.DHT*LFAK.A	gi|16131075|ref|NP_417652.1| 50S ribosomal subunit protein L27 [Escherichia coli str. K-12 substr. MG1655]
PKA_1r.03222.03222.2.dta	2.7099	2	R.HLES*VVTNK.I	gi|16128156|ref|NP_414705.1| conserved protein [Escherichia coli str. K-12 substr. MG1655]
PKA_1r.03295.03295.2.dta	2.8294	2	K.LKS*EFVK.K	gi|16131934|ref|NP_418532.1| conserved protein [Escherichia coli str. K-12 substr. MG1655]
PKA_1r.03307.03307.2.dta	2.3387	2	R.VVRNT*LLR.R	gi|16131815|ref|NP_418412.1| 50S ribosomal subunit protein L10 [Escherichia coli str. K-12 substr. MG1655]
PKA_1r.03313.03313.2.dta	2.8234	2	K.KLT*SGPALPGK.L	gi|16130926|ref|NP_417502.1| DNA topoisomerase IV, subunit B [Escherichia coli str. K-12 substr. MG1655]
PKA_1r.03338.03338.2.dta	2.3482	2	R.RCQT*IDTLER.V	gi|16128444|ref|NP_414993.1| modulator of gene expression, with H-NS [Escherichia coli str. K-12 substr. MG1655]
PKA_1r.03342.03342.2.dta	3.1974	2	K.SVPVKDT*EVVER.L	gi|16128226|ref|NP_414775.1| DNA-binding transcriptional regulator [Escherichia coli str. K-12 substr. MG1655]
PKA_1r.03377.03377.2.dta	2.7199	2	R.VKS*VTFCAR.S	gi|16130232|ref|NP_416800.1| phosphate acetyltransferase [Escherichia coli str. K-12 substr. MG1655]
PKA_1r.03409.03409.2.dta	2.6073	2	K.MAVKGS*QVIK.A	gi|16131060|ref|NP_417637.1| fused protein chain initiation factor 2, IF2: membrane protein/conserved protein [Escherichia coli str. K-12 substr. MG1655]
PKA_1r.03425.03425.2.dta	2.6978	2	K.GGGSANKT*YLYQETK.A	gi|16129570|ref|NP_416129.1| fumarate hydratase (fumarase A), aerobic Class I [Escherichia coli str. K-12 substr. MG1655]
PKA_1r.03425.03425.2.dta	2.6978	2	K.GGGSANKT*YLYQETK.A	gi|16131948|ref|NP_418546.1| anaerobic class I fumarate hydratase (fumarase B) [Escherichia coli str. K-12 substr. MG1655]
PKA_1r.03434.03434.2.dta	2.6695	2	R.WQGKGT*FVQSQK.V	gi|162135910|ref|NP_417834.6| predicted DNA-binding transcriptional regulator [Escherichia coli str. K-12 substr. MG1655]
PKA_1r.03449.03449.2.dta	2.401	2	K.GRS*HAT*AQEEILK.L	gi|16130963|ref|NP_417539.1| RNA polymerase, sigma 70 (sigma D) factor [Escherichia coli str. K-12 substr. MG1655]
PKA_1r.03465.03465.2.dta	3.5559	2	R.SHAT*AQEEILK.L	gi|16130963|ref|NP_417539.1| RNA polymerase, sigma 70 (sigma D) factor [Escherichia coli str. K-12 substr. MG1655]
PKA_1r.03474.03474.2.dta	2.5759	2	R.DGHALS*DEEIR.F	gi|16132199|ref|NP_418799.1| thymidine phosphorylase [Escherichia coli str. K-12 substr. MG1655]
PKA_1r.03482.03482.2.dta	2.7485	2	K.SYSS*KGQDLVER.N	gi|16129339|ref|NP_415896.1| fused predicted pyruvate-flavodoxin oxidoreductase: conserved protein/conserved protein/FeS binding protein [Escherichia coli str. K-12 substr. MG1655]
PKA_1r.03497.03497.2.dta	2.7306	2	R.IQKIS*GANLSR.N	gi|16128108|ref|NP_414657.1| pyruvate dehydrogenase, dihydrolipoyltransacetylase component E2 [Escherichia coli str. K-12 substr. MG1655]
PKA_1r.03517.03517.2.dta	2.6156	2	R.SGLAS*LHAR.V	gi|16131818|ref|NP_418415.1| RNA polymerase, beta prime subunit [Escherichia coli str. K-12 substr. MG1655]
PKA_1r.03530.03530.2.dta	2.7751	2	K.MAVKGS*QVIK.A	gi|16131060|ref|NP_417637.1| fused protein chain initiation factor 2, IF2: membrane protein/conserved protein [Escherichia coli str. K-12 substr. MG1655]
PKA_1r.03577.03577.2.dta	2.3594	2	-.MES*KVVVPAQGK.K	gi|16129099|ref|NP_415654.1| e14 prophage; isocitrate dehydrogenase, specific for NADP+ [Escherichia coli str. K-12 substr. MG1655]
PKA_1r.03579.03579.2.dta	2.5128	2	R.REEES*AAAAEVEER.T	gi|16129198|ref|NP_415753.1| global DNA-binding transcriptional dual regulator H-NS [Escherichia coli str. K-12 substr. MG1655]
PKA_1r.03614.03614.2.dta	2.6432	2	R.SGLAS*LHAR.V	gi|16131818|ref|NP_418415.1| RNA polymerase, beta prime subunit [Escherichia coli str. K-12 substr. MG1655]
PKA_1r.03664.03664.2.dta	2.4984	2	R.KGMS*VTEVER.W	gi|16131845|ref|NP_418443.1| homocysteine-N5-methyltetrahydrofolate transmethylase, B12-dependent [Escherichia coli str. K-12 substr. MG1655]
PKA_1r.03694.03694.3.dta	3.255	3	R.HGAS*CPVGM#GVSCSADR.N	gi|16129570|ref|NP_416129.1| fumarate hydratase (fumarase A), aerobic Class I [Escherichia coli str. K-12 substr. MG1655]
PKA_1r.03694.03694.3.dta	3.255	3	R.HGAS*CPVGM#GVSCSADR.N	gi|16131948|ref|NP_418546.1| anaerobic class I fumarate hydratase (fumarase B) [Escherichia coli str. K-12 substr. MG1655]
PKA_1r.03726.03726.2.dta	2.6904	2	K.KLT*PEQAEQIK.T	gi|16128561|ref|NP_415110.1| dihydropteridine reductase, NAD(P)H-dependent, oxygen-insensitive [Escherichia coli str. K-12 substr. MG1655]
PKA_1r.03790.03790.2.dta	3.09	2	R.TQMS*AAHTPEQITR.A	gi|16131488|ref|NP_418074.1| glycine C-acetyltransferase [Escherichia coli str. K-12 substr. MG1655]
PKA_1r.03800.03800.2.dta	3.278	2	K.YEEITAS*CSCGNVM#K.I	gi|16131774|ref|NP_418371.1| 50S ribosomal subunit protein L31 [Escherichia coli str. K-12 substr. MG1655]
PKA_1r.03812.03812.2.dta	2.521	2	K.SNT*IVLK.V	gi|16131197|ref|NP_417777.1| 50S ribosomal subunit protein L23 [Escherichia coli str. K-12 substr. MG1655]
PKA_1r.03834.03834.2.dta	3.0189	2	R.ANS*HAPEAVVEGASR.A	gi|16128712|ref|NP_415265.1| membrane spanning protein in TolA-TolQ-TolR complex [Escherichia coli str. K-12 substr. MG1655]
PKA_1r.03865.03865.2.dta	3.2028	2	R.S*HATAQEEILK.L	gi|16130963|ref|NP_417539.1| RNA polymerase, sigma 70 (sigma D) factor [Escherichia coli str. K-12 substr. MG1655]
PKA_1r.03869.03869.2.dta	2.7754	2	R.RT*IQVLQR.R	gi|16130513|ref|NP_417083.1| protein disaggregation chaperone [Escherichia coli str. K-12 substr. MG1655]
PKA_1r.03871.03871.2.dta	2.8971	2	R.YCVNSAS*LR.F	gi|16129732|ref|NP_416292.1| methionine sulfoxide reductase B [Escherichia coli str. K-12 substr. MG1655]
PKA_1r.03874.03874.2.dta	2.4993	2	K.YPVHLS*GGQQQR.V	gi|16130241|ref|NP_416809.1| histidine/lysine/arginine/ornithine transporter subunit [Escherichia coli str. K-12 substr. MG1655]
PKA_1r.03878.03878.2.dta	3.3654	2	R.NPQTGKEIT*IAAAK.V	gi|16128425|ref|NP_414974.1| HU, DNA-binding transcriptional regulator, beta subunit [Escherichia coli str. K-12 substr. MG1655]
PKA_1r.03910.03910.2.dta	2.8557	2	K.RVS*NILAK.S	gi|16131430|ref|NP_418016.1| glycine tRNA synthetase, beta subunit [Escherichia coli str. K-12 substr. MG1655]
PKA_1r.03925.03925.2.dta	3.312	2	R.VMAGKS*LAEQGVTK.E	gi|16128027|ref|NP_414574.1| carbamoyl-phosphate synthase large subunit [Escherichia coli str. K-12 substr. MG1655]
PKA_1r.03954.03954.2.dta	3.0249	2	R.HET*ISEDELR.Q	gi|90111652|ref|NP_418264.4| conserved protein [Escherichia coli str. K-12 substr. MG1655]
PKA_1r.03968.03968.2.dta	2.7769	2	K.GGGS*ANKTYLYQETK.A	gi|16129570|ref|NP_416129.1| fumarate hydratase (fumarase A), aerobic Class I [Escherichia coli str. K-12 substr. MG1655]
PKA_1r.03968.03968.2.dta	2.7769	2	K.GGGS*ANKTYLYQETK.A	gi|16131948|ref|NP_418546.1| anaerobic class I fumarate hydratase (fumarase B) [Escherichia coli str. K-12 substr. MG1655]
PKA_1r.03975.03975.2.dta	2.9654	2	K.HFS*VNQM#INK.E	gi|16129595|ref|NP_416154.1| tyrosyl-tRNA synthetase [Escherichia coli str. K-12 substr. MG1655]
PKA_1r.04025.04025.2.dta	2.9505	2	K.RVS*NILAK.S	gi|16131430|ref|NP_418016.1| glycine tRNA synthetase, beta subunit [Escherichia coli str. K-12 substr. MG1655]
PKA_1r.04047.04047.2.dta	2.7631	2	R.LKNT*LIDAK.E	gi|16129263|ref|NP_415818.1| GABA aminotransferase, PLP-dependent [Escherichia coli str. K-12 substr. MG1655]
PKA_1r.04054.04054.2.dta	2.4118	2	K.AWKET*RNEDIAAR.L	gi|16132171|ref|NP_418770.1| endonuclease R [Escherichia coli str. K-12 substr. MG1655]
PKA_1r.04055.04055.2.dta	2.7713	2	R.KIS*VDSATM#MNK.G	gi|16128166|ref|NP_414715.1| 1-deoxy-D-xylulose 5-phosphate reductoisomerase [Escherichia coli str. K-12 substr. MG1655]
PKA_1r.04076.04076.2.dta	3.6172	2	R.KGS*ENYALTTNQGVR.I	gi|49176140|ref|YP_025308.1| hydroperoxidase HPII(III) (catalase) [Escherichia coli str. K-12 substr. MG1655]
PKA_1r.04083.04083.2.dta	2.4472	2	K.RES*LQALPAR.I	gi|16130780|ref|NP_417354.1| predicted oxidoreductase, Fe-S subunit [Escherichia coli str. K-12 substr. MG1655]
PKA_1r.04084.04084.2.dta	3.4017	2	-.MTKS*ELIER.L	gi|16128879|ref|NP_415432.1| integration host factor (IHF), DNA-binding protein, beta subunit [Escherichia coli str. K-12 substr. MG1655]
PKA_1r.04090.04090.2.dta	2.8893	2	K.HFS*VNQM#INK.E	gi|16129595|ref|NP_416154.1| tyrosyl-tRNA synthetase [Escherichia coli str. K-12 substr. MG1655]
PKA_1r.04101.04101.2.dta	3.2885	2	K.LQAKAS*DLVSR.K	gi|90111097|ref|NP_414731.2| modulator of Rho-dependent transcription termination [Escherichia coli str. K-12 substr. MG1655]
PKA_1r.04105.04105.2.dta	2.3339	2	R.HGAS*CPVGMGVSCSADR.N	gi|16129570|ref|NP_416129.1| fumarate hydratase (fumarase A), aerobic Class I [Escherichia coli str. K-12 substr. MG1655]
PKA_1r.04105.04105.2.dta	2.3339	2	R.HGAS*CPVGMGVSCSADR.N	gi|16131948|ref|NP_418546.1| anaerobic class I fumarate hydratase (fumarase B) [Escherichia coli str. K-12 substr. MG1655]
PKA_1r.04117.04117.2.dta	2.5242	2	R.VLT*EAAVAGKR.D	gi|16131818|ref|NP_418415.1| RNA polymerase, beta prime subunit [Escherichia coli str. K-12 substr. MG1655]
PKA_1r.04136.04136.2.dta	2.4371	2	R.RIS*VISGGPGTGK.T	gi|16130723|ref|NP_417296.1| exonuclease V (RecBCD complex), alpha chain [Escherichia coli str. K-12 substr. MG1655]
PKA_1r.04154.04154.2.dta	3.4778	2	R.VYKCT*LCVDR.V	gi|16129434|ref|NP_415992.1| formate dehydrogenase-N, Fe-S (beta) subunit, nitrate-inducible [Escherichia coli str. K-12 substr. MG1655]
PKA_1r.04154.04154.2.dta	3.4778	2	R.VYKCT*LCVDR.V	gi|16131733|ref|NP_418329.1| formate dehydrogenase-O, Fe-S subunit [Escherichia coli str. K-12 substr. MG1655]
PKA_1r.04156.04156.2.dta	2.8819	2	R.RIS*VISGGPGTGK.T	gi|16130723|ref|NP_417296.1| exonuclease V (RecBCD complex), alpha chain [Escherichia coli str. K-12 substr. MG1655]
PKA_1r.04169.04169.2.dta	2.5413	2	K.IQS*RAELLK.K	gi|16132218|ref|NP_418818.1| DNA-binding response regulator in two-component regulatory system with ArcB or CpxA [Escherichia coli str. K-12 substr. MG1655]
PKA_1r.04175.04175.2.dta	3.7586	2	R.DNS*AGLDLANEHR.L	gi|16128980|ref|NP_415534.1| fused DNA-binding transcriptional regulator/proline dehydrogenase/pyrroline-5-carboxylate dehydrogenase [Escherichia coli str. K-12 substr. MG1655]
PKA_1r.04191.04191.2.dta	2.5908	2	R.YT*QLIER.L	gi|16131057|ref|NP_417634.1| 30S ribosomal subunit protein S15 [Escherichia coli str. K-12 substr. MG1655]
PKA_1r.04192.04192.2.dta	2.8298	2	K.VAKS*NVPALEACPQK.R	gi|16131221|ref|NP_417801.1| 30S ribosomal subunit protein S12 [Escherichia coli str. K-12 substr. MG1655]
PKA_1r.04233.04233.2.dta	3.2603	2	K.YKFT*DVNGETK.T	gi|16130583|ref|NP_417155.1| DNA binding protein, nucleoid-associated [Escherichia coli str. K-12 substr. MG1655]
PKA_1r.04244.04244.2.dta	3.1956	2	R.HNT*LGTEFK.A	gi|16129197|ref|NP_415752.1| glucose-1-phosphate uridylyltransferase [Escherichia coli str. K-12 substr. MG1655]
PKA_1r.04246.04246.2.dta	2.9832	2	R.GVCT*RVYTTTPK.K	gi|16131221|ref|NP_417801.1| 30S ribosomal subunit protein S12 [Escherichia coli str. K-12 substr. MG1655]
PKA_1r.04249.04249.2.dta	3.7205	2	-.M#KS*VVNDTDGIVR.V	gi|16130029|ref|NP_416594.1| galactitol-1-phosphate dehydrogenase, Zn-dependent and NAD(P)-binding [Escherichia coli str. K-12 substr. MG1655]
PKA_1r.04256.04256.2.dta	3.2637	2	K.GAIVTGKVT*AVDAK.G	gi|16128878|ref|NP_415431.1| 30S ribosomal subunit protein S1 [Escherichia coli str. K-12 substr. MG1655]
PKA_1r.04301.04301.2.dta	2.8082	2	K.RNS*LDALCAR.Y	gi|16128202|ref|NP_414751.1| DNA polymerase III epsilon subunit [Escherichia coli str. K-12 substr. MG1655]
PKA_1r.04310.04310.2.dta	2.454	2	R.RT*IELGVTK.V	gi|16131029|ref|NP_417606.1| tagatose 6-phosphate aldolase 1, kbaY subunit [Escherichia coli str. K-12 substr. MG1655]
PKA_1r.04312.04312.2.dta	2.6186	2	K.LDKS*LLAR.R	gi|16130393|ref|NP_416963.1| fused predicted oxidoreductase: FeS binding subunit/NAD/FAD-binding subunit [Escherichia coli str. K-12 substr. MG1655]
PKA_1r.04317.04317.2.dta	3.1304	2	K.HSAS*FDICENGAK.A	gi|16129460|ref|NP_416018.1| predicted oxidoreductase [Escherichia coli str. K-12 substr. MG1655]
PKA_1r.04320.04320.2.dta	2.8092	2	R.NERLS*GYAGSAGVAK.V	gi|16132206|ref|NP_418806.1| predicted repair protein [Escherichia coli str. K-12 substr. MG1655]
PKA_1r.04327.04327.2.dta	2.4501	2	K.RGS*TLPM#LAK.M	gi|90111398|ref|NP_416652.4| Dihydropyrimidine dehydrogenase, NADH-dependent, subunit B [Escherichia coli str. K-12 substr. MG1655]
PKA_1r.04357.04357.2.dta	3.0382	2	K.SWGS*DAKGEAEAAR.S	gi|49176257|ref|NP_417158.3| predicted protein [Escherichia coli str. K-12 substr. MG1655]
PKA_1r.04365.04365.3.dta	3.3924	3	K.APAKES*APAAAAPAAQPALAAR.S	gi|16128702|ref|NP_415255.1| dihydrolipoyltranssuccinase [Escherichia coli str. K-12 substr. MG1655]
PKA_1r.04371.04371.2.dta	2.3546	2	K.RS*VAIALR.N	gi|16131769|ref|NP_418366.1| molecular chaperone and ATPase component of HslUV protease [Escherichia coli str. K-12 substr. MG1655]
PKA_1r.04393.04393.2.dta	2.9522	2	R.S*ASHYLLSDQK.S	gi|16128808|ref|NP_415361.1| DNA-binding transcriptional repressor [Escherichia coli str. K-12 substr. MG1655]
PKA_1r.04398.04398.2.dta	3.2647	2	R.KT*IASNAITINGEK.Q	gi|16129595|ref|NP_416154.1| tyrosyl-tRNA synthetase [Escherichia coli str. K-12 substr. MG1655]
PKA_1r.04402.04402.2.dta	2.5092	2	K.IQAYPEGKPS*AIAK.I	gi|90111666|ref|NP_418346.2| conserved protein [Escherichia coli str. K-12 substr. MG1655]
PKA_1r.04404.04404.2.dta	2.5766	2	K.TPEGYASGS*LGPTTAGR.M	gi|16129570|ref|NP_416129.1| fumarate hydratase (fumarase A), aerobic Class I [Escherichia coli str. K-12 substr. MG1655]
PKA_1r.04408.04408.2.dta	2.8587	2	R.RET*LEM#VVR.D	gi|16129152|ref|NP_415707.1| D-amino acid dehydrogenase [Escherichia coli str. K-12 substr. MG1655]
PKA_1r.04409.04409.2.dta	2.6164	2	K.LVITSRNT*ELK.L	gi|16131818|ref|NP_418415.1| RNA polymerase, beta prime subunit [Escherichia coli str. K-12 substr. MG1655]
PKA_1r.04411.04411.2.dta	2.8245	2	K.NGIIHTT*IGK.V	gi|16131814|ref|NP_418411.1| 50S ribosomal subunit protein L1 [Escherichia coli str. K-12 substr. MG1655]
PKA_1r.04417.04417.2.dta	2.3863	2	K.LICGIERPS*AGK.I	gi|16131335|ref|NP_417920.1| predicted transporter subunit: ATP-binding component of ABC superfamily [Escherichia coli str. K-12 substr. MG1655]
PKA_1r.04419.04419.2.dta	3.6879	2	K.KIS*ADQVDQEVER.F	gi|16130342|ref|NP_416911.1| PEP-protein phosphotransferase of PTS system (enzyme I) [Escherichia coli str. K-12 substr. MG1655]
PKA_1r.04432.04432.2.dta	3.5886	2	-.MKS*VVNDTDGIVR.V	gi|16130029|ref|NP_416594.1| galactitol-1-phosphate dehydrogenase, Zn-dependent and NAD(P)-binding [Escherichia coli str. K-12 substr. MG1655]
PKA_1r.04437.04437.3.dta	4.276	3	R.KGS*S*LQQGFQKPAQAVNR.D	gi|16131060|ref|NP_417637.1| fused protein chain initiation factor 2, IF2: membrane protein/conserved protein [Escherichia coli str. K-12 substr. MG1655]
PKA_1r.04454.04454.2.dta	2.9175	2	K.KSES*MVGPLTR.Q	gi|16129245|ref|NP_415800.1| predicted DNA-binding transcriptional regulator [Escherichia coli str. K-12 substr. MG1655]
PKA_1r.04458.04458.2.dta	2.4168	2	R.TSPLKPVS*TVQPR.E	gi|16129034|ref|NP_415589.1| anti-sigma factor for FliA (sigma 28) [Escherichia coli str. K-12 substr. MG1655]
PKA_1r.04467.04467.2.dta	2.836	2	R.GNRVT*VDGEIVR.N	gi|16130121|ref|NP_416688.1| 16S rRNA pseudouridylate 516 synthase [Escherichia coli str. K-12 substr. MG1655]
PKA_1r.04474.04474.2.dta	2.5598	2	R.M#LT*KFGAVR.T	gi|16131127|ref|NP_417704.1| DNA-binding transcriptional dual regulator, L-arginine-binding [Escherichia coli str. K-12 substr. MG1655]
PKA_1r.04477.04477.2.dta	3.2345	2	R.HM#S*GDIDNFPR.D	gi|16131052|ref|NP_417629.1| predicted enzyme [Escherichia coli str. K-12 substr. MG1655]
PKA_1r.04530.04530.2.dta	3.039	2	K.KNS*ETLENFSEK.L	gi|16129206|ref|NP_415761.1| oligopeptide transporter subunit [Escherichia coli str. K-12 substr. MG1655]
PKA_1r.04532.04532.2.dta	4.4247	2	R.NEADEKLS*AELSR.L	gi|16128053|ref|NP_414601.1| RNA polymerase-associated helicase protein (ATPase and RNA polymerase recycling factor) [Escherichia coli str. K-12 substr. MG1655]
PKA_1r.04540.04540.2.dta	2.9392	2	R.IRS*VGEM#AENQFR.V	gi|16131817|ref|NP_418414.1| RNA polymerase, beta subunit [Escherichia coli str. K-12 substr. MG1655]
PKA_1r.04547.04547.2.dta	3.2444	2	R.VDDVLNVS*GHR.L	gi|16131895|ref|NP_418493.1| acetyl-CoA synthetase [Escherichia coli str. K-12 substr. MG1655]
PKA_1r.04548.04548.2.dta	2.9928	2	R.SKGES*SLFSR.D	gi|16131817|ref|NP_418414.1| RNA polymerase, beta subunit [Escherichia coli str. K-12 substr. MG1655]
PKA_1r.04557.04557.2.dta	3.0767	2	R.KPIS*QGGLLK.Y	gi|16131102|ref|NP_417679.1| glutamate synthase, large subunit [Escherichia coli str. K-12 substr. MG1655]
PKA_1r.04564.04564.2.dta	3.7098	2	R.HIVGAIANEGDIS*SR.Y	gi|90111550|ref|NP_417631.2| ATP-dependent RNA helicase [Escherichia coli str. K-12 substr. MG1655]
PKA_1r.04569.04569.2.dta	2.7752	2	R.SYT*HELIAR.F	gi|90111671|ref|NP_418402.2| glutamate racemase [Escherichia coli str. K-12 substr. MG1655]
PKA_1r.04584.04584.2.dta	2.7018	2	R.KLS*EQGLITR.H	gi|90111660|ref|NP_418320.2| predicted DNA-binding transcriptional regulator [Escherichia coli str. K-12 substr. MG1655]
PKA_1r.04627.04627.2.dta	3.3308	2	K.NYITES*GKIVPSR.I	gi|16132024|ref|NP_418623.1| 30S ribosomal subunit protein S18 [Escherichia coli str. K-12 substr. MG1655]
PKA_1r.04629.04629.2.dta	2.709	2	R.IELTRNS*FGGAK.N	gi|16130232|ref|NP_416800.1| phosphate acetyltransferase [Escherichia coli str. K-12 substr. MG1655]
PKA_1r.04634.04634.2.dta	3.8052	2	R.HDS*GDPVEWGEK.A	gi|16128898|ref|NP_415451.1| nicotinate phosphoribosyltransferase [Escherichia coli str. K-12 substr. MG1655]
PKA_1r.04638.04638.2.dta	2.4259	2	R.LRVS*VADVSK.V	gi|16129064|ref|NP_415619.1| fused glucose-specific PTS enzymes: IIB component/IIC component [Escherichia coli str. K-12 substr. MG1655]
PKA_1r.04640.04640.2.dta	2.3616	2	R.RGS*IPALVNNK.L	gi|90111234|ref|NP_415719.2| predicted DNA-binding transcriptional regulator, dihydroxyacetone [Escherichia coli str. K-12 substr. MG1655]
PKA_1r.04644.04644.2.dta	3.9109	2	K.KLS*NNTACVFTGK.G	gi|16129715|ref|NP_416275.1| glutamate dehydrogenase, NADP-specific [Escherichia coli str. K-12 substr. MG1655]
PKA_1r.04650.04650.2.dta	3.0666	2	R.TGKCS*FLPEER.E	gi|16129703|ref|NP_416263.1| exonuclease III [Escherichia coli str. K-12 substr. MG1655]
PKA_1r.04662.04662.2.dta	2.6191	2	R.LKS*DFGVVK.N	gi|16130719|ref|NP_417292.1| conserved protein [Escherichia coli str. K-12 substr. MG1655]
PKA_1r.04712.04712.2.dta	2.5671	2	K.IFVDEGPS*MKR.I	gi|16131194|ref|NP_417774.1| 50S ribosomal subunit protein L22 [Escherichia coli str. K-12 substr. MG1655]
PKA_1r.04715.04715.2.dta	2.8084	2	-.MRLNT*LSPAEGSK.K	gi|16131180|ref|NP_417760.1| 50S ribosomal subunit protein L15 [Escherichia coli str. K-12 substr. MG1655]
PKA_1r.04716.04716.2.dta	2.4241	2	R.KST*PFAAQVAAER.C	gi|16131176|ref|NP_417756.1| 30S ribosomal subunit protein S11 [Escherichia coli str. K-12 substr. MG1655]
PKA_1r.04725.04725.2.dta	2.409	2	R.TRVS*LGLK.Q	gi|16128878|ref|NP_415431.1| 30S ribosomal subunit protein S1 [Escherichia coli str. K-12 substr. MG1655]
PKA_1r.04771.04771.2.dta	2.5081	2	K.KM#S*VGQILR.N	gi|16130988|ref|NP_417564.1| hexuronate transporter [Escherichia coli str. K-12 substr. MG1655]
PKA_1r.04775.04775.2.dta	2.862	2	K.IRYT*QIAPTSR.G	gi|16129848|ref|NP_416410.1| trehalose-6-phosphate synthase [Escherichia coli str. K-12 substr. MG1655]
PKA_1r.04805.04805.2.dta	3.8567	2	R.VAKS*AAGNYVFNER.K	gi|16128561|ref|NP_415110.1| dihydropteridine reductase, NAD(P)H-dependent, oxygen-insensitive [Escherichia coli str. K-12 substr. MG1655]
PKA_1r.04816.04816.2.dta	4.2995	2	-.MKS*VVNDTDGIVR.V	gi|16130029|ref|NP_416594.1| galactitol-1-phosphate dehydrogenase, Zn-dependent and NAD(P)-binding [Escherichia coli str. K-12 substr. MG1655]
PKA_1r.04835.04835.2.dta	3.6205	2	R.KGS*QVYIEGQLR.T	gi|16131885|ref|NP_418483.1| single-stranded DNA-binding protein [Escherichia coli str. K-12 substr. MG1655]
PKA_1r.04838.04838.2.dta	3.3236	2	R.KVT*VQQVLVK.G	gi|16131535|ref|NP_418121.1| cryptic adenine deaminase [Escherichia coli str. K-12 substr. MG1655]
PKA_1r.04841.04841.2.dta	2.6227	2	R.IYGT*AWADKK.A	gi|16129675|ref|NP_416234.1| threonyl-tRNA synthetase [Escherichia coli str. K-12 substr. MG1655]
PKA_1r.04849.04849.2.dta	2.8776	2	K.S*AGGIVLTGSAAAK.S	gi|16131967|ref|NP_418566.1| Cpn10 chaperonin GroES, small subunit of GroESL [Escherichia coli str. K-12 substr. MG1655]
PKA_1r.04866.04866.2.dta	3.8076	2	R.KM#QS*FDADIPK.I	gi|16129649|ref|NP_416208.1| 3-dehydroquinate dehydratase [Escherichia coli str. K-12 substr. MG1655]
PKA_1r.04883.04883.3.dta	3.0123	3	R.LQINQHYAS*MCNNAR.N	gi|16131092|ref|NP_417669.1| RNA polymerase, sigma 54 (sigma N) factor [Escherichia coli str. K-12 substr. MG1655]
PKA_1r.04905.04905.2.dta	2.8535	2	R.KVS*QAFYDNVR.S	gi|145698262|ref|NP_416007.3| predicted diguanylate cyclase [Escherichia coli str. K-12 substr. MG1655]
PKA_1r.04910.04910.2.dta	3.5181	2	R.GRS*MDSVMAQYQK.T	gi|90111379|ref|NP_416570.2| uridine/cytidine kinase [Escherichia coli str. K-12 substr. MG1655]
PKA_1r.04913.04913.2.dta	2.6464	2	K.KLS*M#APSYFSSK.M	gi|16131274|ref|NP_417856.1| ADP-ribose diphosphatase [Escherichia coli str. K-12 substr. MG1655]
PKA_1r.04923.04923.2.dta	3.1445	2	R.GKS*VEEILGK.-	gi|16131182|ref|NP_417762.1| 30S ribosomal subunit protein S5 [Escherichia coli str. K-12 substr. MG1655]
PKA_1r.04949.04949.2.dta	2.4572	2	R.LRS*INAAFK.R	gi|16130839|ref|NP_417413.1| biosynthetic arginine decarboxylase, PLP-binding [Escherichia coli str. K-12 substr. MG1655]
PKA_1r.04955.04955.2.dta	3.0683	2	K.VKS*LIADEDNPNLK.L	gi|16128149|ref|NP_414698.1| conserved protein [Escherichia coli str. K-12 substr. MG1655]
PKA_1r.04956.04956.2.dta	2.8145	2	K.IRQT*LQAQLTR.L	gi|90111530|ref|NP_417514.4| conserved protein [Escherichia coli str. K-12 substr. MG1655]
PKA_1r.04978.04978.2.dta	3.4323	2	R.KGS*QVYIEGQLR.T	gi|16131885|ref|NP_418483.1| single-stranded DNA-binding protein [Escherichia coli str. K-12 substr. MG1655]
PKA_1r.04988.04988.2.dta	4.1354	2	R.VKS*QAIEGLVK.A	gi|16128421|ref|NP_414970.1| peptidyl-prolyl cis/trans isomerase (trigger factor) [Escherichia coli str. K-12 substr. MG1655]
PKA_1r.04995.04995.2.dta	3.413	2	R.GKDLGS*M#DVNEVIEK.L	gi|16129675|ref|NP_416234.1| threonyl-tRNA synthetase [Escherichia coli str. K-12 substr. MG1655]
PKA_1r.05003.05003.2.dta	2.7821	2	R.HGCALGS*IVGK.D	gi|16128087|ref|NP_414636.1| ATP-binding cell division protein involved in recruitment of FtsK to Z ring [Escherichia coli str. K-12 substr. MG1655]
PKA_1r.05040.05040.2.dta	3.0605	2	R.VHS*TYGNVDVLK.A	gi|90111183|ref|NP_415414.4| dimethyl sulfoxide reductase, anaerobic, subunit A [Escherichia coli str. K-12 substr. MG1655]
PKA_1r.05042.05042.2.dta	2.918	2	R.GRS*MDSVMAQYQK.T	gi|90111379|ref|NP_416570.2| uridine/cytidine kinase [Escherichia coli str. K-12 substr. MG1655]
PKA_1r.05043.05043.2.dta	2.5045	2	R.SKS*FFDGVK.K	gi|16128009|ref|NP_414556.1| chaperone Hsp40, co-chaperone with DnaK [Escherichia coli str. K-12 substr. MG1655]
PKA_1r.05044.05044.2.dta	3.8911	2	R.IHS*FESCGTVDGPGIR.F	gi|16128869|ref|NP_415422.1| pyruvate formate lyase activating enzyme 1 [Escherichia coli str. K-12 substr. MG1655]
PKA_1r.05055.05055.2.dta	2.3982	2	R.VAGEMNLS*KTQLR.S	gi|49176156|ref|YP_026161.1| predicted structural transport element [Escherichia coli str. K-12 substr. MG1655]
PKA_1r.05088.05088.2.dta	2.8412	2	R.IQS*IHYLDR.K	gi|16131763|ref|NP_418360.1| fructose 1,6-bisphosphatase II [Escherichia coli str. K-12 substr. MG1655]
PKA_1r.05105.05105.2.dta	3.4363	2	R.AREAS*GFGADYNAM#IR.V	gi|16130604|ref|NP_417177.1| alanyl-tRNA synthetase [Escherichia coli str. K-12 substr. MG1655]
PKA_1r.05108.05108.2.dta	3.966	2	R.GGICGS*DLHYYQEGK.V	gi|16132089|ref|NP_418688.1| L-idonate 5-dehydrogenase, NAD-binding [Escherichia coli str. K-12 substr. MG1655]
PKA_1r.05113.05113.2.dta	3.1019	2	R.KGS*QVYIEGQLR.T	gi|16131885|ref|NP_418483.1| single-stranded DNA-binding protein [Escherichia coli str. K-12 substr. MG1655]
PKA_1r.05115.05115.2.dta	2.9656	2	R.GKS*VEEILGK.-	gi|16131182|ref|NP_417762.1| 30S ribosomal subunit protein S5 [Escherichia coli str. K-12 substr. MG1655]
PKA_1r.05118.05118.2.dta	2.5262	2	R.VKS*QAIEGLVK.A	gi|16128421|ref|NP_414970.1| peptidyl-prolyl cis/trans isomerase (trigger factor) [Escherichia coli str. K-12 substr. MG1655]
PKA_1r.05119.05119.2.dta	2.7503	2	R.NEPSGS*LHGLMR.V	gi|16129675|ref|NP_416234.1| threonyl-tRNA synthetase [Escherichia coli str. K-12 substr. MG1655]
PKA_1r.05123.05123.2.dta	2.9202	2	K.GKTYS*INEGNYIK.F	gi|16132054|ref|NP_418653.1| fructose-1,6-bisphosphatase I [Escherichia coli str. K-12 substr. MG1655]
PKA_1r.05127.05127.2.dta	2.9086	2	R.DLIDDARQS*LK.Q	gi|16128406|ref|NP_414955.1| geranyltranstransferase [Escherichia coli str. K-12 substr. MG1655]
PKA_1r.05144.05144.2.dta	2.3462	2	R.IHTS*YENVLGK.N	gi|16131372|ref|NP_417957.1| glutathione oxidoreductase [Escherichia coli str. K-12 substr. MG1655]
PKA_1r.05152.05152.2.dta	2.4542	2	R.S*LNVALR.Q	gi|16129099|ref|NP_415654.1| e14 prophage; isocitrate dehydrogenase, specific for NADP+ [Escherichia coli str. K-12 substr. MG1655]
PKA_1r.05163.05163.2.dta	2.4868	2	R.GLHS*AFTVR.K	gi|16130527|ref|NP_417097.1| 50S ribosomal subunit protein L19 [Escherichia coli str. K-12 substr. MG1655]
PKA_1r.05178.05178.3.dta	3.0291	3	K.EKINPAGAPT*YVPGEYK.L	gi|16128421|ref|NP_414970.1| peptidyl-prolyl cis/trans isomerase (trigger factor) [Escherichia coli str. K-12 substr. MG1655]
PKA_1r.05184.05184.2.dta	2.6008	2	R.RLT*LQDNPAIAR.V	gi|49176479|ref|YP_026287.1| predicted acetyltransferase [Escherichia coli str. K-12 substr. MG1655]
PKA_1r.05186.05186.2.dta	3.2588	2	R.HMS*GDIDNFPR.D	gi|16131052|ref|NP_417629.1| predicted enzyme [Escherichia coli str. K-12 substr. MG1655]
PKA_1r.05206.05206.2.dta	3.1103	2	R.IAHWVGQGAT*ISDR.V	gi|16130530|ref|NP_417100.1| 30S ribosomal subunit protein S16 [Escherichia coli str. K-12 substr. MG1655]
PKA_1r.05214.05214.2.dta	3.9237	2	R.HNIS*FAEVESK.L	gi|16128366|ref|NP_414915.1| D-alanine-D-alanine ligase A [Escherichia coli str. K-12 substr. MG1655]
PKA_1r.05243.05243.2.dta	2.7011	2	K.LVKS*KAT*NLLYTR.N	gi|16128780|ref|NP_415333.1| Fe-binding and storage protein [Escherichia coli str. K-12 substr. MG1655]
PKA_1r.05284.05284.2.dta	3.0295	2	R.RES*LGLDSESIR.L	gi|16129497|ref|NP_416056.1| dipeptidyl carboxypeptidase II [Escherichia coli str. K-12 substr. MG1655]
PKA_1r.05288.05288.2.dta	2.9858	2	K.ARGTT*QVFEAYSK.F	gi|16130255|ref|NP_416823.1| erythronate-4-phosphate dehydrogenase [Escherichia coli str. K-12 substr. MG1655]
PKA_1r.05299.05299.2.dta	2.5445	2	R.SKS*FFDGVK.K	gi|16128009|ref|NP_414556.1| chaperone Hsp40, co-chaperone with DnaK [Escherichia coli str. K-12 substr. MG1655]
PKA_1r.05313.05313.2.dta	2.6851	2	K.HIGES*ASDILR.R	gi|16128663|ref|NP_415213.1| regulatory protein for replication initiation [Escherichia coli str. K-12 substr. MG1655]
PKA_1r.05326.05326.2.dta	3.1335	2	R.HMS*GDIDNFPR.D	gi|16131052|ref|NP_417629.1| predicted enzyme [Escherichia coli str. K-12 substr. MG1655]
PKA_1r.05343.05343.2.dta	3.0064	2	R.LVHTLNGS*GLAVGR.T	gi|16128860|ref|NP_415413.1| seryl-tRNA synthetase, also charges selenocysteinyl-tRNA with serine [Escherichia coli str. K-12 substr. MG1655]
PKA_1r.05391.05391.2.dta	2.7342	2	R.AVTDKPS*LLMCK.T	gi|49176286|ref|YP_026188.1| transketolase 1, thiamin-binding [Escherichia coli str. K-12 substr. MG1655]
PKA_1r.05428.05428.2.dta	3.0447	2	R.STVGHDLNLDVCS*K.C	gi|16131774|ref|NP_418371.1| 50S ribosomal subunit protein L31 [Escherichia coli str. K-12 substr. MG1655]
PKA_1r.05442.05442.2.dta	3.4844	2	K.HLT*QVTPAGQEIIR.I	gi|16129236|ref|NP_415791.1| DNA-binding transcriptional dual regulator, O-acetyl-L-serine-binding [Escherichia coli str. K-12 substr. MG1655]
PKA_1r.05465.05465.2.dta	2.3963	2	R.FVTLRVS*AK.G	gi|16131508|ref|NP_418094.1| 50S ribosomal subunit protein L28 [Escherichia coli str. K-12 substr. MG1655]
PKA_1r.05469.05469.2.dta	2.9188	2	R.RET*LEMVVR.D	gi|16129152|ref|NP_415707.1| D-amino acid dehydrogenase [Escherichia coli str. K-12 substr. MG1655]
PKA_1r.05479.05479.2.dta	2.9729	2	-.MKS*VVNDTDGIVR.V	gi|16130029|ref|NP_416594.1| galactitol-1-phosphate dehydrogenase, Zn-dependent and NAD(P)-binding [Escherichia coli str. K-12 substr. MG1655]
PKA_1r.05495.05495.3.dta	3.2095	3	R.S*QILDEAKAEAEQER.T	gi|16131604|ref|NP_418192.1| F0 sector of membrane-bound ATP synthase, subunit b [Escherichia coli str. K-12 substr. MG1655]
PKA_1r.05499.05499.2.dta	3.0525	2	R.YHGT*SYNLEPDIK.S	gi|16128160|ref|NP_414709.1| uridylyltransferase [Escherichia coli str. K-12 substr. MG1655]
PKA_1r.05539.05539.3.dta	3.437	3	K.AGMDSHGFGMAS*VR.F	gi|16131488|ref|NP_418074.1| glycine C-acetyltransferase [Escherichia coli str. K-12 substr. MG1655]
PKA_1r.05540.05540.2.dta	2.8174	2	R.RLS*PIAEQLDK.I	gi|16132082|ref|NP_418681.1| aminopeptidase A, a cyteinylglycinase [Escherichia coli str. K-12 substr. MG1655]
PKA_1r.05546.05546.2.dta	3.2073	2	R.TRVS*EISIVGR.N	gi|16130166|ref|NP_416734.1| DNA gyrase (type II topoisomerase), subunit A [Escherichia coli str. K-12 substr. MG1655]
PKA_1r.05569.05569.2.dta	2.651	2	R.INRLT*MLEK.L	gi|16131430|ref|NP_418016.1| glycine tRNA synthetase, beta subunit [Escherichia coli str. K-12 substr. MG1655]
PKA_1r.05577.05577.2.dta	2.5492	2	R.KIS*SLESLEK.L	gi|16129583|ref|NP_416142.1| predicted regulator [Escherichia coli str. K-12 substr. MG1655]
PKA_1r.05597.05597.2.dta	2.5974	2	R.RGS*FAAAADELGR.V	gi|16131000|ref|NP_417576.1| predicted DNA-binding transcriptional regulator [Escherichia coli str. K-12 substr. MG1655]
PKA_1r.05599.05599.2.dta	3.1017	2	R.FAT*HGGYLLQGK.E	gi|16129202|ref|NP_415757.1| fused acetaldehyde-CoA dehydrogenase/iron-dependent alcohol dehydrogenase/pyruvate-formate lyase deactivase [Escherichia coli str. K-12 substr. MG1655]
PKA_1r.05616.05616.2.dta	2.8755	2	R.SKQDVS*LLPENQQALK.F	gi|90111392|ref|NP_416629.4| predicted response regulator in two-component system withYehU [Escherichia coli str. K-12 substr. MG1655]
PKA_1r.05618.05618.2.dta	2.8228	2	R.KLS*FTGSTEIGR.Q	gi|16130575|ref|NP_417147.1| succinate-semialdehyde dehydrogenase I, NADP-dependent [Escherichia coli str. K-12 substr. MG1655]
PKA_1r.05621.05621.2.dta	3.1996	2	R.GITINTS*HVEYDTPTR.H	gi|16131218|ref|NP_417798.1| protein chain elongation factor EF-Tu (duplicate of tufB) [Escherichia coli str. K-12 substr. MG1655]
PKA_1r.05621.05621.2.dta	3.1996	2	R.GITINTS*HVEYDTPTR.H	gi|16131810|ref|NP_418407.1| protein chain elongation factor EF-Tu (duplicate of tufA) [Escherichia coli str. K-12 substr. MG1655]
PKA_1r.05629.05629.2.dta	2.7027	2	K.RFS*TYAIAAER.G	gi|16128124|ref|NP_414673.1| aspartate 1-decarboxylase [Escherichia coli str. K-12 substr. MG1655]
PKA_1r.05643.05643.2.dta	2.9965	2	R.VKIAS*SGLCGSDLPR.I	gi|16130029|ref|NP_416594.1| galactitol-1-phosphate dehydrogenase, Zn-dependent and NAD(P)-binding [Escherichia coli str. K-12 substr. MG1655]
PKA_1r.05646.05646.2.dta	3.8622	2	R.HLNAT*IINEGDINTR.R	gi|16130232|ref|NP_416800.1| phosphate acetyltransferase [Escherichia coli str. K-12 substr. MG1655]
PKA_1r.05658.05658.2.dta	4.2951	2	R.HQQADLS*LVEAADK.Y	gi|16131473|ref|NP_418059.1| conserved protein [Escherichia coli str. K-12 substr. MG1655]
PKA_1r.05662.05662.2.dta	2.5426	2	R.GFGHT*LGNALR.R	gi|16131174|ref|NP_417754.1| RNA polymerase, alpha subunit [Escherichia coli str. K-12 substr. MG1655]
PKA_1r.05670.05670.2.dta	3.1779	2	R.KAS*IPEGVWTK.C	gi|16130251|ref|NP_416819.1| acetyl-CoA carboxylase, beta (carboxyltranferase) subunit [Escherichia coli str. K-12 substr. MG1655]
PKA_1r.05684.05684.2.dta	2.6335	2	R.KAS*IPEGVWTK.C	gi|16130251|ref|NP_416819.1| acetyl-CoA carboxylase, beta (carboxyltranferase) subunit [Escherichia coli str. K-12 substr. MG1655]
PKA_1r.05700.05700.2.dta	3.4935	2	R.KVIEAES*LDLR.Y	gi|16131060|ref|NP_417637.1| fused protein chain initiation factor 2, IF2: membrane protein/conserved protein [Escherichia coli str. K-12 substr. MG1655]
PKA_1r.05711.05711.2.dta	2.9725	2	K.MKSS*AIFINAGR.G	gi|90111614|ref|NP_418009.2| 2-keto-D-gluconate reductase (glyoxalate reductase) (2-ketoaldonate reductase) [Escherichia coli str. K-12 substr. MG1655]
PKA_1r.05751.05751.2.dta	2.394	2	R.REGT*DLFLK.S	gi|16131175|ref|NP_417755.1| 30S ribosomal subunit protein S4 [Escherichia coli str. K-12 substr. MG1655]
PKA_1r.05752.05752.2.dta	2.7783	2	R.RELS*INDEVIK.L	gi|16129093|ref|NP_415648.1| DNA-binding response regulator in two-component regulatory system with PhoQ [Escherichia coli str. K-12 substr. MG1655]
PKA_1r.05776.05776.2.dta	2.8843	2	R.KIT*QGDDLAPGVLK.I	gi|16131817|ref|NP_418414.1| RNA polymerase, beta subunit [Escherichia coli str. K-12 substr. MG1655]
PKA_1r.05785.05785.2.dta	2.8197	2	K.SRET*LNLLK.E	gi|16130420|ref|NP_416990.1| predicted oxidoreductase [Escherichia coli str. K-12 substr. MG1655]
PKA_1r.05800.05800.2.dta	2.3664	2	R.KPS*FLITNPGSNQGPR.F	gi|90111152|ref|NP_415139.2| alkyl hydroperoxide reductase, F52a subunit, FAD/NAD(P)-binding [Escherichia coli str. K-12 substr. MG1655]
PKA_1r.05804.05804.2.dta	2.739	2	K.KVT*WAASLGDR.S	gi|90111587|ref|YP_026216.2| transcription elongation factor [Escherichia coli str. K-12 substr. MG1655]
PKA_1r.05815.05815.2.dta	3.073	2	R.KAS*IPEGVWTK.C	gi|16130251|ref|NP_416819.1| acetyl-CoA carboxylase, beta (carboxyltranferase) subunit [Escherichia coli str. K-12 substr. MG1655]
PKA_1r.05869.05869.2.dta	2.5861	2	K.LRS*IVPEMR.R	gi|16128084|ref|NP_414633.1| UDP-N-acetylmuramate:L-alanine ligase [Escherichia coli str. K-12 substr. MG1655]
PKA_1r.05874.05874.2.dta	2.4443	2	K.GAVKGS*GLGLSIAR.D	gi|90111458|ref|NP_417051.2| predicted sensory kinase in two-component system [Escherichia coli str. K-12 substr. MG1655]
PKA_1r.05876.05876.2.dta	2.5109	2	K.IAKES*GLMNAVTPQR.E	gi|16130670|ref|NP_417243.1| sulfite reductase, beta subunit, NAD(P)-binding, heme-binding [Escherichia coli str. K-12 substr. MG1655]
PKA_1r.05880.05880.2.dta	2.8945	2	R.REGT*DLFLK.S	gi|16131175|ref|NP_417755.1| 30S ribosomal subunit protein S4 [Escherichia coli str. K-12 substr. MG1655]
PKA_1r.05881.05881.2.dta	2.7082	2	R.RELS*INDEVIK.L	gi|16129093|ref|NP_415648.1| DNA-binding response regulator in two-component regulatory system with PhoQ [Escherichia coli str. K-12 substr. MG1655]
PKA_1r.05888.05888.2.dta	2.6231	2	R.HGT*ISLTGPDLQR.Q	gi|16128439|ref|NP_414988.1| predicted methyltransferase [Escherichia coli str. K-12 substr. MG1655]
PKA_1r.05902.05902.2.dta	3.1095	2	R.KIT*QGDDLAPGVLK.I	gi|16131817|ref|NP_418414.1| RNA polymerase, beta subunit [Escherichia coli str. K-12 substr. MG1655]
PKA_1r.05945.05945.2.dta	2.6188	2	R.KAS*IPEGVWTK.C	gi|16130251|ref|NP_416819.1| acetyl-CoA carboxylase, beta (carboxyltranferase) subunit [Escherichia coli str. K-12 substr. MG1655]
PKA_1r.05964.05964.2.dta	2.6402	2	R.AILRAS*AFGK.L	gi|16130342|ref|NP_416911.1| PEP-protein phosphotransferase of PTS system (enzyme I) [Escherichia coli str. K-12 substr. MG1655]
PKA_1r.05979.05979.2.dta	3.8054	2	K.HFS*VNQMINK.E	gi|16129595|ref|NP_416154.1| tyrosyl-tRNA synthetase [Escherichia coli str. K-12 substr. MG1655]
PKA_1r.06001.06001.2.dta	2.7691	2	K.LRS*IVPEMR.R	gi|16128084|ref|NP_414633.1| UDP-N-acetylmuramate:L-alanine ligase [Escherichia coli str. K-12 substr. MG1655]
PKA_1r.06026.06026.2.dta	2.3592	2	K.IHIGLDNYS*GGR.A	gi|16131609|ref|NP_418197.1| glucose-inhibited cell-division protein [Escherichia coli str. K-12 substr. MG1655]
PKA_1r.06041.06041.2.dta	2.8325	2	R.HT*IMVANLAPR.K	gi|16130052|ref|NP_416617.1| methionyl-tRNA synthetase [Escherichia coli str. K-12 substr. MG1655]
PKA_1r.06082.06082.2.dta	3.1128	2	K.AYGS*TNPINVVR.A	gi|16131182|ref|NP_417762.1| 30S ribosomal subunit protein S5 [Escherichia coli str. K-12 substr. MG1655]
PKA_1r.06106.06106.2.dta	2.7013	2	R.IGS*LVANDADSYR.Y	gi|49176426|ref|YP_026269.1| bifunctional 2-octaprenyl-6-methoxy-1,4-benzoquinone methylase/ S-adenosylmethionine:2-DMK methyltransferase [Escherichia coli str. K-12 substr. MG1655]
PKA_1r.06133.06133.2.dta	3.1179	2	R.KMQS*FDADIPK.I	gi|16129649|ref|NP_416208.1| 3-dehydroquinate dehydratase [Escherichia coli str. K-12 substr. MG1655]
PKA_1r.06156.06156.2.dta	3.3815	2	K.AEIEGEIGDS*HMGLAAR.M	gi|16130606|ref|NP_417179.1| DNA strand exchange and recombination protein with protease and nuclease activity [Escherichia coli str. K-12 substr. MG1655]
PKA_1r.06247.06247.2.dta	2.6718	2	K.ALLQLHS*GIDR.A	gi|16130922|ref|NP_417498.1| sensory histidine kinase in two-component regulatory system with QseB [Escherichia coli str. K-12 substr. MG1655]
PKA_1r.06252.06252.2.dta	2.6456	2	K.AGDEGKLFGS*IGTR.D	gi|16132025|ref|NP_418624.1| 50S ribosomal subunit protein L9 [Escherichia coli str. K-12 substr. MG1655]
PKA_1r.06258.06258.2.dta	3.2316	2	R.VFQTHSPVVDS*ISVK.R	gi|16130527|ref|NP_417097.1| 50S ribosomal subunit protein L19 [Escherichia coli str. K-12 substr. MG1655]
PKA_1r.06259.06259.2.dta	2.3973	2	R.EKPT*WLEVDAGK.M	gi|16131175|ref|NP_417755.1| 30S ribosomal subunit protein S4 [Escherichia coli str. K-12 substr. MG1655]
PKA_1r.06294.06294.3.dta	3.1325	3	K.FGAVHSYS*IGPVER.F	gi|16129245|ref|NP_415800.1| predicted DNA-binding transcriptional regulator [Escherichia coli str. K-12 substr. MG1655]
PKA_1r.06333.06333.2.dta	2.7102	2	R.LRVDTGDS*LIVK.S	gi|16130891|ref|NP_417465.1| protein involved with the maturation of hydrogenases 1 and 2 [Escherichia coli str. K-12 substr. MG1655]
PKA_1r.06346.06346.2.dta	3.914	2	R.AMQKLT*LTYAETR.R	gi|16131665|ref|NP_418258.1| DNA-dependent ATPase I and helicase II [Escherichia coli str. K-12 substr. MG1655]
PKA_1r.06380.06380.2.dta	2.9709	2	K.AGDEGKLFGS*IGTR.D	gi|16132025|ref|NP_418624.1| 50S ribosomal subunit protein L9 [Escherichia coli str. K-12 substr. MG1655]
PKA_1r.06394.06394.3.dta	3.2352	3	R.IRLS*IKEATEQSQPAAAPEAPAAEQGE.-	gi|145698316|ref|NP_417633.4| polynucleotide phosphorylase/polyadenylase [Escherichia coli str. K-12 substr. MG1655]
PKA_1r.06413.06413.2.dta	2.6389	2	R.VAHLQS*YIDR.F	gi|16131231|ref|NP_417811.1| fused predicted transporter subunits of ABC superfamily: ATP-binding components [Escherichia coli str. K-12 substr. MG1655]
PKA_1r.06419.06419.2.dta	3.2951	2	R.KET*LVEYGFR.L	gi|16128747|ref|NP_415300.1| excinulease of nucleotide excision repair, DNA damage recognition component [Escherichia coli str. K-12 substr. MG1655]
PKA_1r.06439.06439.2.dta	2.5355	2	R.VFQTHSPVVDSIS*VK.R	gi|16130527|ref|NP_417097.1| 50S ribosomal subunit protein L19 [Escherichia coli str. K-12 substr. MG1655]
PKA_1r.06452.06452.2.dta	2.3785	2	R.LHS*FELAM#DVK.E	gi|16131052|ref|NP_417629.1| predicted enzyme [Escherichia coli str. K-12 substr. MG1655]
PKA_1r.06464.06464.3.dta	4.3667	3	K.AHIVATNPPFGS*AAGTNITR.T	gi|16132170|ref|NP_418769.1| DNA methylase M [Escherichia coli str. K-12 substr. MG1655]
PKA_1r.06467.06467.2.dta	3.8336	2	K.HQFAQS*LNYEIAK.T	gi|16130232|ref|NP_416800.1| phosphate acetyltransferase [Escherichia coli str. K-12 substr. MG1655]
PKA_1r.06468.06468.2.dta	3.6743	2	K.MEKS*IVVAIER.F	gi|16131190|ref|NP_417770.1| 30S ribosomal subunit protein S17 [Escherichia coli str. K-12 substr. MG1655]
PKA_1r.06500.06500.2.dta	4.3544	2	R.HLS*EAEIDNYVR.K	gi|90111211|ref|NP_415605.2| predicted protein [Escherichia coli str. K-12 substr. MG1655]
PKA_1r.06515.06515.2.dta	2.8242	2	K.KGQQLSS*FAQLR.D	gi|16131734|ref|NP_418330.1| formate dehydrogenase-O, large subunit [Escherichia coli str. K-12 substr. MG1655]
PKA_1r.06526.06526.2.dta	2.6627	2	K.DVARYT*QLIER.L	gi|16131057|ref|NP_417634.1| 30S ribosomal subunit protein S15 [Escherichia coli str. K-12 substr. MG1655]
PKA_1r.06543.06543.2.dta	4.6311	2	K.IHCS*ILAEDAIK.A	gi|16130454|ref|NP_417024.1| scaffold protein [Escherichia coli str. K-12 substr. MG1655]
PKA_1r.06582.06582.3.dta	4.0296	3	R.ALS*REYAQLSDVSR.C	gi|16129174|ref|NP_415729.1| peptide chain release factor RF-1 [Escherichia coli str. K-12 substr. MG1655]
PKA_1r.06588.06588.2.dta	3.4902	2	R.HIDS*LTEEEENWR.R	gi|16132212|ref|NP_418812.1| phosphoglyceromutase 2, co-factor independent [Escherichia coli str. K-12 substr. MG1655]
PKA_1r.06647.06647.2.dta	2.4326	2	R.ARPES*QELNILR.G	gi|16130457|ref|NP_417027.1| predicted methyltransferase [Escherichia coli str. K-12 substr. MG1655]
PKA_1r.06674.06674.3.dta	3.037	3	K.IRS*T*VGHDLNLDVCSK.C	gi|16131774|ref|NP_418371.1| 50S ribosomal subunit protein L31 [Escherichia coli str. K-12 substr. MG1655]
PKA_1r.06676.06676.2.dta	3.2474	2	K.IHCS*ILAEDAIK.A	gi|16130454|ref|NP_417024.1| scaffold protein [Escherichia coli str. K-12 substr. MG1655]
PKA_1r.06730.06730.2.dta	2.3363	2	K.GLAALS*LPEHQR.W	gi|16130111|ref|NP_416678.1| predicted enzyme [Escherichia coli str. K-12 substr. MG1655]
PKA_1r.06745.06745.2.dta	3.2099	2	K.IHCS*ILAEDAIK.A	gi|16130454|ref|NP_417024.1| scaffold protein [Escherichia coli str. K-12 substr. MG1655]
PKA_1r.06769.06769.2.dta	2.4982	2	R.ARPES*QELNILR.G	gi|16130457|ref|NP_417027.1| predicted methyltransferase [Escherichia coli str. K-12 substr. MG1655]
PKA_1r.06856.06856.2.dta	2.5502	2	K.GLAALS*LPEHQR.W	gi|16130111|ref|NP_416678.1| predicted enzyme [Escherichia coli str. K-12 substr. MG1655]
PKA_1r.06857.06857.2.dta	2.6691	2	R.S*AGT*YVQIVAR.D	gi|16131196|ref|NP_417776.1| 50S ribosomal subunit protein L2 [Escherichia coli str. K-12 substr. MG1655]
PKA_1r.06859.06859.2.dta	3.086	2	R.SFT*FVTK.T	gi|16131813|ref|NP_418410.1| 50S ribosomal subunit protein L11 [Escherichia coli str. K-12 substr. MG1655]
PKA_1r.06878.06878.2.dta	2.5402	2	K.HVDS*LITIPNDK.L	gi|16128088|ref|NP_414637.1| GTP-binding tubulin-like cell division protein [Escherichia coli str. K-12 substr. MG1655]
PKA_1r.06885.06885.2.dta	4.4841	2	R.AHGFAVS*LDSDDVETR.M	gi|16129245|ref|NP_415800.1| predicted DNA-binding transcriptional regulator [Escherichia coli str. K-12 substr. MG1655]
PKA_1r.06894.06894.2.dta	3.0841	2	K.LHLAQS*LANGTPYVNR.N	gi|16129806|ref|NP_416367.1| predicted DNA-binding transcriptional regulator [Escherichia coli str. K-12 substr. MG1655]
PKA_1r.06914.06914.2.dta	2.3301	2	R.FLT*CGSVDDGKSTLIGR.L	gi|16130658|ref|NP_417231.1| sulfate adenylyltransferase, subunit 1 [Escherichia coli str. K-12 substr. MG1655]
PKA_1r.06975.06975.3.dta	4.2035	3	K.YLKGS*LAYAEDPCGAEQGFSGR.E	gi|16130694|ref|NP_417267.1| (D)-glucarate dehydratase 1 [Escherichia coli str. K-12 substr. MG1655]
PKA_1r.06976.06976.2.dta	2.6101	2	R.RFDS*CFLTAK.K	gi|16131312|ref|NP_417897.1| predicted oxidoreductase with NAD(P)-binding Rossmann-fold domain [Escherichia coli str. K-12 substr. MG1655]
PKA_1r.06991.06991.3.dta	3.7526	3	R.KAT*PLPYQSQPDDSCDWYR.L	gi|16130694|ref|NP_417267.1| (D)-glucarate dehydratase 1 [Escherichia coli str. K-12 substr. MG1655]
PKA_1r.06996.06996.2.dta	2.5175	2	R.RNYGS*LIGEATAER.I	gi|90111564|ref|NP_417717.2| cell wall structural complex MreBCD, actin-like component MreB [Escherichia coli str. K-12 substr. MG1655]
PKA_1r.07032.07032.3.dta	3.1649	3	K.LAQARES*IIADNNIQTLR.R	gi|16128454|ref|NP_415003.1| DNA polymerase III/DNA elongation factor III, tau and gamma subunits [Escherichia coli str. K-12 substr. MG1655]
PKA_1r.07114.07114.3.dta	3.9115	3	R.AAGLHLQES*IAEQGALR.D	gi|16128698|ref|NP_415251.1| succinate dehydrogenase, flavoprotein subunit [Escherichia coli str. K-12 substr. MG1655]
PKA_1r.07132.07132.2.dta	2.376	2	K.RVVS*MVEFEK.A	gi|16131068|ref|NP_417645.1| protease, ATP-dependent zinc-metallo [Escherichia coli str. K-12 substr. MG1655]
PKA_1r.07135.07135.2.dta	2.6525	2	K.EHGYETVVMGAS*FR.N	gi|16128002|ref|NP_414549.1| transaldolase B [Escherichia coli str. K-12 substr. MG1655]
PKA_1r.07158.07158.2.dta	2.3864	2	K.RVT*ASVGSWIK.R	gi|16128087|ref|NP_414636.1| ATP-binding cell division protein involved in recruitment of FtsK to Z ring [Escherichia coli str. K-12 substr. MG1655]
PKA_1r.07164.07164.2.dta	2.6562	2	R.KFIS*IEAE.-	gi|16131075|ref|NP_417652.1| 50S ribosomal subunit protein L27 [Escherichia coli str. K-12 substr. MG1655]
PKA_1r.07170.07170.2.dta	3.4752	2	R.GLKNS*LNNVLTVR.A	gi|16129046|ref|NP_415601.1| flagellar hook-filament junction protein [Escherichia coli str. K-12 substr. MG1655]
PKA_1r.07172.07172.2.dta	2.6938	2	K.DGS*GKLLYCSFCGK.S	gi|16128423|ref|NP_414972.1| ATPase and specificity subunit of ClpX-ClpP ATP-dependent serine protease [Escherichia coli str. K-12 substr. MG1655]
PKA_1r.07200.07200.2.dta	3.7148	2	R.VHS*DYSMIDGLAK.T	gi|16128177|ref|NP_414726.1| DNA polymerase III alpha subunit [Escherichia coli str. K-12 substr. MG1655]
PKA_1r.07207.07207.2.dta	2.3547	2	K.VKIS*EIIK.H	gi|90111719|ref|NP_418700.2| KpLE2 phage-like element; predicted oxidoreductase [Escherichia coli str. K-12 substr. MG1655]
PKA_1r.07222.07222.2.dta	2.3477	2	R.KGEILGVS*GLM#GAGR.T	gi|16131617|ref|NP_418205.1| fused D-ribose transporter subunits of ABC superfamily: ATP-binding components [Escherichia coli str. K-12 substr. MG1655]
PKA_1r.07269.07269.2.dta	2.6154	2	R.TFS*IIKPNAVAK.N	gi|16130443|ref|NP_417013.1| multifunctional nucleoside diphosphate kinase and apyrimidinic endonuclease and 3'-phosphodiesterase [Escherichia coli str. K-12 substr. MG1655]
PKA_1r.07293.07293.3.dta	3.0752	3	R.IGNHYNNPS*FGYGGYCLPKDT*K.Q	gi|16129969|ref|NP_416532.1| UDP-glucose 6-dehydrogenase [Escherichia coli str. K-12 substr. MG1655]
PKA_1r.07296.07296.3.dta	3.8238	3	K.FCRFT*AEGVQEIDYK.D	gi|16132024|ref|NP_418623.1| 30S ribosomal subunit protein S18 [Escherichia coli str. K-12 substr. MG1655]
PKA_1r.07341.07341.2.dta	3.9716	2	R.NVVLDKS*FGAPTITK.D	gi|16131968|ref|NP_418567.1| Cpn60 chaperonin GroEL, large subunit of GroESL [Escherichia coli str. K-12 substr. MG1655]
PKA_1r.07346.07346.2.dta	2.4974	2	K.KIT*VSIPLK.V	gi|16131776|ref|NP_418373.1| DNA-binding transcriptional repressor, S-adenosylmethionine-binding [Escherichia coli str. K-12 substr. MG1655]
PKA_1r.07354.07354.3.dta	3.3353	3	K.NGVIVVGHRES*SVPFSYYDNQQK.V	gi|16128638|ref|NP_415188.1| glutamate and aspartate transporter subunit [Escherichia coli str. K-12 substr. MG1655]
PKA_1r.07361.07361.3.dta	3.1646	3	R.AREAS*GFGADYNAMIR.V	gi|16130604|ref|NP_417177.1| alanyl-tRNA synthetase [Escherichia coli str. K-12 substr. MG1655]
PKA_1r.07388.07388.2.dta	2.4818	2	R.HYNS*LNPAFLR.A	gi|49176446|ref|YP_026278.1| fused predicted PTS enzymes: Hpr component/enzyme I component/enzyme IIA component [Escherichia coli str. K-12 substr. MG1655]
PKA_1r.07395.07395.2.dta	2.8355	2	R.FT*VLISPHVNK.D	gi|16131200|ref|NP_417780.1| 30S ribosomal subunit protein S10 [Escherichia coli str. K-12 substr. MG1655]
PKA_1r.07397.07397.2.dta	4.4801	2	R.HGS*GIVCLCITEDR.R	gi|16130937|ref|NP_417513.1| 3,4-dihydroxy-2-butanone-4-phosphate synthase [Escherichia coli str. K-12 substr. MG1655]
PKA_1r.07406.07406.2.dta	2.3929	2	R.HGLQS*ILR.E	gi|16131052|ref|NP_417629.1| predicted enzyme [Escherichia coli str. K-12 substr. MG1655]
PKA_1r.07470.07470.2.dta	2.8522	2	R.ARLS*LNYLPK.T	gi|16130692|ref|NP_417265.1| 23S rRNA (uracil-5)-methyltransferase [Escherichia coli str. K-12 substr. MG1655]
PKA_1r.07501.07501.2.dta	3.0922	2	K.AAHS*FNLLDAR.K	gi|16131431|ref|NP_418017.1| glycine tRNA synthetase, alpha subunit [Escherichia coli str. K-12 substr. MG1655]
PKA_1r.07517.07517.2.dta	2.726	2	K.IDKS*VMAGVIIR.A	gi|16131603|ref|NP_418191.1| F1 sector of membrane-bound ATP synthase, delta subunit [Escherichia coli str. K-12 substr. MG1655]
PKA_1r.07555.07555.3.dta	3.4829	3	K.ERFT*VLIS*PHVNK.D	gi|16131200|ref|NP_417780.1| 30S ribosomal subunit protein S10 [Escherichia coli str. K-12 substr. MG1655]
PKA_1r.07580.07580.2.dta	2.9923	2	R.YLT*KCLENLK.I	gi|90111587|ref|YP_026216.2| transcription elongation factor [Escherichia coli str. K-12 substr. MG1655]
PKA_1r.07585.07585.2.dta	2.5332	2	K.IGS*LGMDVYENER.D	gi|16129341|ref|NP_415898.1| fermentative D-lactate dehydrogenase, NAD-dependent [Escherichia coli str. K-12 substr. MG1655]
PKA_1r.07599.07599.2.dta	3.8594	2	R.S*KAILAAAGIAEDVK.I	gi|16131177|ref|NP_417757.1| 30S ribosomal subunit protein S13 [Escherichia coli str. K-12 substr. MG1655]
PKA_1r.07602.07602.2.dta	2.9198	2	R.KIS*WM#EIYTGEK.S	gi|16129099|ref|NP_415654.1| e14 prophage; isocitrate dehydrogenase, specific for NADP+ [Escherichia coli str. K-12 substr. MG1655]
PKA_1r.07604.07604.2.dta	3.127	2	K.KAS*QVAILNANYIASR.L	gi|16130805|ref|NP_417379.1| glycine decarboxylase, PLP-dependent, subunit (protein P) of glycine cleavage complex [Escherichia coli str. K-12 substr. MG1655]
PKA_1r.07614.07614.2.dta	2.3576	2	R.S*LEQYFGR.E	gi|16131120|ref|NP_417697.1| 30S ribosomal subunit protein S9 [Escherichia coli str. K-12 substr. MG1655]
PKA_1r.07643.07643.2.dta	4.3766	2	R.S*HDALTAVTSLSVDK.T	gi|16129052|ref|NP_415607.1| 50S ribosomal subunit protein L32 [Escherichia coli str. K-12 substr. MG1655]
PKA_1r.07646.07646.2.dta	2.8535	2	K.GKVQLLGSGS*ILR.H	gi|16128107|ref|NP_414656.1| pyruvate dehydrogenase, decarboxylase component E1, thiamin-binding [Escherichia coli str. K-12 substr. MG1655]
PKA_1r.07649.07649.3.dta	3.4627	3	R.FRALS*NPDLYEGDGELR.V	gi|16128457|ref|NP_415006.1| molecular chaperone HSP90 family [Escherichia coli str. K-12 substr. MG1655]
PKA_1r.07650.07650.2.dta	2.3471	2	K.GRAS*YTMEFLK.Y	gi|16131219|ref|NP_417799.1| protein chain elongation factor EF-G, GTP-binding [Escherichia coli str. K-12 substr. MG1655]
PKA_1r.07663.07663.2.dta	3.0105	2	K.KFT*ALGPYIR.E	gi|16128226|ref|NP_414775.1| DNA-binding transcriptional regulator [Escherichia coli str. K-12 substr. MG1655]
PKA_1r.07685.07685.2.dta	3.0382	2	R.RAT*AFAISVINDK.A	gi|16131465|ref|NP_418051.1| lyase containing HEAT-repeat [Escherichia coli str. K-12 substr. MG1655]
PKA_1r.07749.07749.2.dta	2.7836	2	R.KIS*WM#EIYTGEK.S	gi|16129099|ref|NP_415654.1| e14 prophage; isocitrate dehydrogenase, specific for NADP+ [Escherichia coli str. K-12 substr. MG1655]
PKA_1r.07766.07766.2.dta	3.1268	2	K.HAVIALTS*IYGVGK.T	gi|16131177|ref|NP_417757.1| 30S ribosomal subunit protein S13 [Escherichia coli str. K-12 substr. MG1655]
PKA_1r.07779.07779.2.dta	2.8937	2	R.KAWLS*GLSPK.E	gi|145698340|ref|NP_418473.2| tRNA-dihydrouridine synthase A [Escherichia coli str. K-12 substr. MG1655]
PKA_1r.07784.07784.2.dta	3.392	2	K.FGS*ELLAK.F	gi|16131220|ref|NP_417800.1| 30S ribosomal subunit protein S7 [Escherichia coli str. K-12 substr. MG1655]
PKA_1r.07788.07788.2.dta	2.8517	2	K.HIS*GQFNAELESIR.T	gi|16131592|ref|NP_418180.1| negative regulator of PhoR/PhoB two-component regulator [Escherichia coli str. K-12 substr. MG1655]
PKA_1r.07820.07820.2.dta	2.8775	2	K.S*GVLTGLPDAYGR.G	gi|16128870|ref|NP_415423.1| pyruvate formate lyase I [Escherichia coli str. K-12 substr. MG1655]
PKA_1r.07821.07821.3.dta	3.6281	3	R.NPS*ISTHLLGSNASSVIR.H	gi|16128590|ref|NP_415140.1| universal stress protein UP12 [Escherichia coli str. K-12 substr. MG1655]
PKA_1r.07838.07838.2.dta	2.3229	2	K.IFT*KIIR.E	gi|16129817|ref|NP_416378.1| conserved protein [Escherichia coli str. K-12 substr. MG1655]
PKA_1r.07842.07842.2.dta	2.691	2	K.KIT*VVPILR.A	gi|90111448|ref|NP_416993.2| uracil phosphoribosyltransferase [Escherichia coli str. K-12 substr. MG1655]
PKA_1r.07848.07848.2.dta	2.821	2	K.GAGLVDFIHS*ESR.L	gi|16131734|ref|NP_418330.1| formate dehydrogenase-O, large subunit [Escherichia coli str. K-12 substr. MG1655]
PKA_1r.07855.07855.3.dta	4.2654	3	R.KQT*SLNGFYQDNGGDADLLR.L	gi|16128095|ref|NP_414644.1| conserved protein [Escherichia coli str. K-12 substr. MG1655]
PKA_1r.07864.07864.3.dta	3.8266	3	R.YGAS*VRQDVLGDLM#SR.N	gi|16128421|ref|NP_414970.1| peptidyl-prolyl cis/trans isomerase (trigger factor) [Escherichia coli str. K-12 substr. MG1655]
PKA_1r.07869.07869.2.dta	2.7657	2	R.GVKLS*AEDIWDR.C	gi|16130926|ref|NP_417502.1| DNA topoisomerase IV, subunit B [Escherichia coli str. K-12 substr. MG1655]
PKA_1r.07871.07871.2.dta	3.2741	2	K.FES*EVYILSKDEGGR.H	gi|16131218|ref|NP_417798.1| protein chain elongation factor EF-Tu (duplicate of tufB) [Escherichia coli str. K-12 substr. MG1655]
PKA_1r.07871.07871.2.dta	3.2741	2	K.FES*EVYILSKDEGGR.H	gi|16131810|ref|NP_418407.1| protein chain elongation factor EF-Tu (duplicate of tufA) [Escherichia coli str. K-12 substr. MG1655]
PKA_1r.07874.07874.2.dta	3.0128	2	R.ERAS*EISALIVEEGGK.I	gi|16129376|ref|NP_415933.1| aldehyde dehydrogenase A, NAD-linked [Escherichia coli str. K-12 substr. MG1655]
PKA_1r.07878.07878.2.dta	3.0585	2	K.KLGM#S*MDNVVVTLDR.H	gi|16129054|ref|NP_415609.1| 3-oxoacyl-[acyl-carrier-protein] synthase III [Escherichia coli str. K-12 substr. MG1655]
PKA_1r.07886.07886.2.dta	2.4162	2	K.TYHYYS*LPLAAK.S	gi|16129237|ref|NP_415792.1| aconitate hydratase 1 [Escherichia coli str. K-12 substr. MG1655]
PKA_1r.07888.07888.3.dta	3.6181	3	R.IDETIAQVTGS*AHVGNLYVNR.N	gi|16128980|ref|NP_415534.1| fused DNA-binding transcriptional regulator/proline dehydrogenase/pyrroline-5-carboxylate dehydrogenase [Escherichia coli str. K-12 substr. MG1655]
PKA_1r.07904.07904.3.dta	3.0018	3	K.VKGGFT*VELNGIR.A	gi|16128878|ref|NP_415431.1| 30S ribosomal subunit protein S1 [Escherichia coli str. K-12 substr. MG1655]
PKA_1r.07930.07930.2.dta	3.9402	2	R.LHS*FELAMDVK.E	gi|16131052|ref|NP_417629.1| predicted enzyme [Escherichia coli str. K-12 substr. MG1655]
PKA_1r.07931.07931.2.dta	4.2259	2	K.AM#DEQGKS*LDDFLIKQ.-	gi|16129198|ref|NP_415753.1| global DNA-binding transcriptional dual regulator H-NS [Escherichia coli str. K-12 substr. MG1655]
PKA_1r.07941.07941.2.dta	2.5271	2	R.GFGS*FSLHYR.A	gi|16128879|ref|NP_415432.1| integration host factor (IHF), DNA-binding protein, beta subunit [Escherichia coli str. K-12 substr. MG1655]
PKA_1r.07949.07949.3.dta	3.0676	3	R.VVS*DKMEKS*IVVAIER.F	gi|16131190|ref|NP_417770.1| 30S ribosomal subunit protein S17 [Escherichia coli str. K-12 substr. MG1655]
PKA_1r.07981.07981.2.dta	3.408	2	R.MKSDT*QWVIDSMR.V	gi|16130087|ref|NP_416654.1| fused methyl-galactoside transporter subunits of ABC superfamily: ATP-binding components [Escherichia coli str. K-12 substr. MG1655]
PKA_1r.07982.07982.2.dta	3.2847	2	R.S*AELLDTMAHDYR.Q	gi|90111560|ref|NP_417700.2| conserved protein [Escherichia coli str. K-12 substr. MG1655]
PKA_1r.07985.07985.2.dta	2.3544	2	K.KAQIAELQS*FVSR.F	gi|16128788|ref|NP_415341.1| fused predicted transporter subunits of ABC superfamily: ATP-binding components [Escherichia coli str. K-12 substr. MG1655]
PKA_1r.07993.07993.3.dta	3.2079	3	R.FERS*VLTQLYR.N	gi|16129284|ref|NP_415839.1| DNA-binding transcriptional dual regulator, tyrosine-binding [Escherichia coli str. K-12 substr. MG1655]
PKA_1r.07996.07996.2.dta	3.024	2	-.MKT*LGEFIVEK.Q	gi|16132054|ref|NP_418653.1| fructose-1,6-bisphosphatase I [Escherichia coli str. K-12 substr. MG1655]
PKA_1r.08047.08047.3.dta	3.1398	3	R.NKVT*DAEIAEVLAR.W	gi|16130513|ref|NP_417083.1| protein disaggregation chaperone [Escherichia coli str. K-12 substr. MG1655]
PKA_1r.08091.08091.3.dta	3.7534	3	K.S*RDDLQAVMAM#VR.G	gi|90111132|ref|NP_414960.2| predicted nucleotide binding protein [Escherichia coli str. K-12 substr. MG1655]
PKA_1r.08107.08107.2.dta	3.1231	2	R.AS*GGFAMLAVDQR.E	gi|16131721|ref|NP_418317.1| predicted aldolase [Escherichia coli str. K-12 substr. MG1655]
PKA_1r.08123.08123.2.dta	3.4485	2	R.GYS*FDDEEHALGLR.C	gi|90111675|ref|NP_418442.2| DNA-binding transcriptional repressor [Escherichia coli str. K-12 substr. MG1655]
PKA_1r.08164.08164.2.dta	3.0268	2	R.TNKVS*LIVCSALK.K	gi|90111591|ref|NP_417894.2| gluconate kinase 2 [Escherichia coli str. K-12 substr. MG1655]
PKA_1r.08190.08190.2.dta	2.6701	2	K.AM#DEQGKS*LDDFLIK.Q	gi|16129198|ref|NP_415753.1| global DNA-binding transcriptional dual regulator H-NS [Escherichia coli str. K-12 substr. MG1655]
PKA_1r.08224.08224.2.dta	2.6684	2	R.RIS*NEESISAMFEH.-	gi|16129170|ref|NP_415725.1| phosphoribosylpyrophosphate synthase [Escherichia coli str. K-12 substr. MG1655]
PKA_1r.08229.08229.2.dta	3.0837	2	K.RAS*QLLDISLTK.R	gi|16130640|ref|NP_417213.1| methyl-directed mismatch repair protein [Escherichia coli str. K-12 substr. MG1655]
PKA_1r.08239.08239.2.dta	3.5269	2	R.KST*FLLDSLGK.Q	gi|16132057|ref|NP_418656.1| predicted peptidase required for the maturation and secretion of the antibiotic peptide MccB17 [Escherichia coli str. K-12 substr. MG1655]
PKA_1r.08258.08258.2.dta	3.5322	2	K.AMDEQGKS*LDDFLIKQ.-	gi|16129198|ref|NP_415753.1| global DNA-binding transcriptional dual regulator H-NS [Escherichia coli str. K-12 substr. MG1655]
PKA_1r.08284.08284.2.dta	4.065	2	R.RAQS*VVDYLISK.G	gi|16128924|ref|NP_415477.1| outer membrane protein A (3a;II*;G;d) [Escherichia coli str. K-12 substr. MG1655]
PKA_1r.08288.08288.2.dta	2.5634	2	R.KGEETPTLS*YMLPK.L	gi|16129047|ref|NP_415602.1| fused ribonucleaseE: endoribonuclease/RNA-binding protein/RNA degradosome binding protein [Escherichia coli str. K-12 substr. MG1655]
PKA_1r.08296.08296.3.dta	3.5043	3	K.GQLPT*RLWVAPPTR.M	gi|16128111|ref|NP_414660.1| bifunctional aconitate hydratase 2/2-methylisocitrate dehydratase [Escherichia coli str. K-12 substr. MG1655]
PKA_1r.08298.08298.2.dta	2.5877	2	K.RGMS*LPMFGK.L	gi|16128496|ref|NP_415045.1| allantoinase [Escherichia coli str. K-12 substr. MG1655]
PKA_1r.08307.08307.2.dta	2.8997	2	R.HS*YILPVLGR.S	gi|16129460|ref|NP_416018.1| predicted oxidoreductase [Escherichia coli str. K-12 substr. MG1655]
PKA_1r.08321.08321.2.dta	2.7468	2	R.RFS*DIPIVM#VTAK.I	gi|16130019|ref|NP_416583.1| DNA-binding response regulator in two-component regulatory system with BaeS [Escherichia coli str. K-12 substr. MG1655]
PKA_1r.08362.08362.3.dta	3.709	3	K.SLGITNPEEIDRYS*LRQEANNDILK.I	gi|16128156|ref|NP_414705.1| conserved protein [Escherichia coli str. K-12 substr. MG1655]
PKA_1r.08363.08363.3.dta	3.636	3	R.NIAIEHSGYS*VFAGVGER.T	gi|16131600|ref|NP_418188.1| F1 sector of membrane-bound ATP synthase, beta subunit [Escherichia coli str. K-12 substr. MG1655]
PKA_1r.08367.08367.2.dta	2.3956	2	R.AALS*MIVEAEKR.G	gi|16130347|ref|NP_416916.1| cysteine synthase B (O-acetylserine sulfhydrolase B) [Escherichia coli str. K-12 substr. MG1655]
PKA_1r.08443.08443.2.dta	2.5663	2	R.EGRS*QDLASQAEESFVEAE.-	gi|16128162|ref|NP_414711.1| 30S ribosomal subunit protein S2 [Escherichia coli str. K-12 substr. MG1655]
PKA_1r.08485.08485.3.dta	3.407	3	R.EALTFVQNYHPALRS*FQNEDLQR.L	gi|16131664|ref|NP_418257.1| predicted hydrolase [Escherichia coli str. K-12 substr. MG1655]
PKA_1r.08507.08507.2.dta	2.7027	2	R.KIS*WM#EIYTGEK.S	gi|16129099|ref|NP_415654.1| e14 prophage; isocitrate dehydrogenase, specific for NADP+ [Escherichia coli str. K-12 substr. MG1655]
PKA_1r.08553.08553.2.dta	2.4435	2	R.LKLAS*ILAK.L	gi|16130251|ref|NP_416819.1| acetyl-CoA carboxylase, beta (carboxyltranferase) subunit [Escherichia coli str. K-12 substr. MG1655]
PKA_1r.08586.08586.2.dta	2.6294	2	K.AMDEQGKS*LDDFLIK.Q	gi|16129198|ref|NP_415753.1| global DNA-binding transcriptional dual regulator H-NS [Escherichia coli str. K-12 substr. MG1655]
PKA_1r.08634.08634.2.dta	2.8716	2	R.KIS*WM#EIYTGEK.S	gi|16129099|ref|NP_415654.1| e14 prophage; isocitrate dehydrogenase, specific for NADP+ [Escherichia coli str. K-12 substr. MG1655]
PKA_1r.08654.08654.2.dta	2.5785	2	R.KPT*MLVTDLTLR.F	gi|16131780|ref|NP_418377.1| catalase/hydroperoxidase HPI(I) [Escherichia coli str. K-12 substr. MG1655]
PKA_1r.08655.08655.2.dta	2.38	2	R.RVT*FLGFDAATEAR.Y	gi|90111415|ref|NP_416797.2| conserved protein [Escherichia coli str. K-12 substr. MG1655]
PKA_1r.08699.08699.2.dta	2.4659	2	R.TRPDLS*EIFDDSSK.A	gi|16130232|ref|NP_416800.1| phosphate acetyltransferase [Escherichia coli str. K-12 substr. MG1655]
PKA_1r.08702.08702.3.dta	3.3389	3	R.RPLS*WVVGDQGVYR.A	gi|16130222|ref|NP_416790.1| NADH:ubiquinone oxidoreductase, chain B [Escherichia coli str. K-12 substr. MG1655]
PKA_1r.08708.08708.3.dta	3.1607	3	R.KWDMQFAPS*ICQQCSIGCNISPGER.Y	gi|145698290|ref|NP_416786.4| NADH:ubiquinone oxidoreductase, chain G [Escherichia coli str. K-12 substr. MG1655]
PKA_1r.08722.08722.3.dta	4.0855	3	K.KVS*QALDILTYTNK.K	gi|16131194|ref|NP_417774.1| 50S ribosomal subunit protein L22 [Escherichia coli str. K-12 substr. MG1655]
PKA_1r.08726.08726.3.dta	3.3439	3	R.IRT*LT*KAVAEAYYASR.E	gi|16131431|ref|NP_418017.1| glycine tRNA synthetase, alpha subunit [Escherichia coli str. K-12 substr. MG1655]
PKA_1r.08789.08789.2.dta	2.6019	2	R.ARYLS*LLPYTDR.H	gi|16132024|ref|NP_418623.1| 30S ribosomal subunit protein S18 [Escherichia coli str. K-12 substr. MG1655]
PKA_1r.08793.08793.2.dta	2.6812	2	R.KGEILGVS*GLMGAGR.T	gi|16131617|ref|NP_418205.1| fused D-ribose transporter subunits of ABC superfamily: ATP-binding components [Escherichia coli str. K-12 substr. MG1655]
PKA_1r.08805.08805.3.dta	4.0057	3	K.RFGGES*VLAGSIIVR.Q	gi|16131075|ref|NP_417652.1| 50S ribosomal subunit protein L27 [Escherichia coli str. K-12 substr. MG1655]
PKA_1r.08819.08819.2.dta	2.3196	2	K.HVFAS*LFNDR.A	gi|16129658|ref|NP_416217.1| phosphoenolpyruvate synthase [Escherichia coli str. K-12 substr. MG1655]
PKA_1r.08820.08820.2.dta	2.6944	2	R.KIS*WMEIYTGEK.S	gi|16129099|ref|NP_415654.1| e14 prophage; isocitrate dehydrogenase, specific for NADP+ [Escherichia coli str. K-12 substr. MG1655]
PKA_1r.08897.08897.3.dta	3.2211	3	K.YYRT*GFNDSLLDIR.Y	gi|16130033|ref|NP_416598.1| D-tagatose 1,6-bisphosphate aldolase 2, subunit [Escherichia coli str. K-12 substr. MG1655]
PKA_1r.08906.08906.3.dta	3.2889	3	R.RPETEAVS*MLLEQAR.L	gi|16128980|ref|NP_415534.1| fused DNA-binding transcriptional regulator/proline dehydrogenase/pyrroline-5-carboxylate dehydrogenase [Escherichia coli str. K-12 substr. MG1655]
PKA_1r.08937.08937.3.dta	3.6316	3	R.RS*T*IFPNM#IGLTIAVHNGR.Q	gi|16131195|ref|NP_417775.1| 30S ribosomal subunit protein S19 [Escherichia coli str. K-12 substr. MG1655]
PKA_1r.08940.08940.2.dta	2.8771	2	R.KIS*WM#EIYTGEK.S	gi|16129099|ref|NP_415654.1| e14 prophage; isocitrate dehydrogenase, specific for NADP+ [Escherichia coli str. K-12 substr. MG1655]
PKA_1r.08945.08945.2.dta	2.7125	2	R.KIS*WMEIYTGEK.S	gi|16129099|ref|NP_415654.1| e14 prophage; isocitrate dehydrogenase, specific for NADP+ [Escherichia coli str. K-12 substr. MG1655]
PKA_1r.08956.08956.2.dta	3.3169	2	R.HAS*DDEPFSALAFK.I	gi|16131219|ref|NP_417799.1| protein chain elongation factor EF-G, GTP-binding [Escherichia coli str. K-12 substr. MG1655]
PKA_1r.08968.08968.3.dta	3.2811	3	R.RGIGYLPQEAS*IFR.R	gi|16131091|ref|NP_417668.1| predicted transporter subunit: ATP-binding component of ABC superfamily [Escherichia coli str. K-12 substr. MG1655]
PKA_1r.08990.08990.3.dta	3.3269	3	K.FCRFT*AEGVQEIDYKDIATLK.N	gi|16132024|ref|NP_418623.1| 30S ribosomal subunit protein S18 [Escherichia coli str. K-12 substr. MG1655]
PKA_1r.09077.09077.2.dta	3.1936	2	R.KIS*WMEIYTGEK.S	gi|16129099|ref|NP_415654.1| e14 prophage; isocitrate dehydrogenase, specific for NADP+ [Escherichia coli str. K-12 substr. MG1655]
PKA_1r.09088.09088.2.dta	3.5286	2	R.HAS*DDEPFSALAFK.I	gi|16131219|ref|NP_417799.1| protein chain elongation factor EF-G, GTP-binding [Escherichia coli str. K-12 substr. MG1655]
PKA_1r.09102.09102.2.dta	2.7961	2	R.KLS*ILLLEK.G	gi|16131463|ref|NP_418049.1| predicted glutathione S-transferase [Escherichia coli str. K-12 substr. MG1655]
PKA_1r.09107.09107.2.dta	2.6697	2	K.S*LGQFNLDGINPAPR.G	gi|16128008|ref|NP_414555.1| chaperone Hsp70, co-chaperone with DnaJ [Escherichia coli str. K-12 substr. MG1655]
PKA_1r.09156.09156.2.dta	2.6801	2	R.NT*ELKLIDEFGR.T	gi|16131818|ref|NP_418415.1| RNA polymerase, beta prime subunit [Escherichia coli str. K-12 substr. MG1655]
PKA_1r.09176.09176.3.dta	3.5002	3	R.VLGRVT*AEDVLKPGTADILVPR.N	gi|16131818|ref|NP_418415.1| RNA polymerase, beta prime subunit [Escherichia coli str. K-12 substr. MG1655]
PKA_1r.09210.09210.3.dta	3.1512	3	K.VKAPVIVQFSNGGAS*FIAGK.G	gi|16130826|ref|NP_417400.1| fructose-bisphosphate aldolase, class II [Escherichia coli str. K-12 substr. MG1655]
PKA_1r.09218.09218.2.dta	2.8556	2	R.RPYS*VILLDEVEK.A	gi|16130513|ref|NP_417083.1| protein disaggregation chaperone [Escherichia coli str. K-12 substr. MG1655]
PKA_1r.09259.09259.3.dta	3.1462	3	K.NLS*EMQFYVTQNHGTEPPFTGR.L	gi|16129732|ref|NP_416292.1| methionine sulfoxide reductase B [Escherichia coli str. K-12 substr. MG1655]
PKA_1r.09290.09290.2.dta	2.5155	2	K.S*LDDFLIKQ.-	gi|16129198|ref|NP_415753.1| global DNA-binding transcriptional dual regulator H-NS [Escherichia coli str. K-12 substr. MG1655]
PKA_1r.09305.09305.2.dta	2.5363	2	R.FGGES*VLAGS*IIVR.Q	gi|16131075|ref|NP_417652.1| 50S ribosomal subunit protein L27 [Escherichia coli str. K-12 substr. MG1655]
PKA_1r.09446.09446.2.dta	2.8597	2	R.LRELS*FLNSGVSIR.L	gi|49176395|ref|YP_026241.1| DNA gyrase, subunit B [Escherichia coli str. K-12 substr. MG1655]
PKA_1r.09549.09549.2.dta	2.8046	2	R.GLAQGTDVSFGS*FGLK.A	gi|16131192|ref|NP_417772.1| 50S ribosomal subunit protein L16 [Escherichia coli str. K-12 substr. MG1655]
PKA_1r.09609.09609.3.dta	3.3144	3	R.NLEEFFARES*CGWCTPCR.D	gi|16130219|ref|NP_416787.1| NADH:ubiquinone oxidoreductase, chain F [Escherichia coli str. K-12 substr. MG1655]
PKA_1r.09636.09636.3.dta	3.3695	3	K.VNRDNIS*LDLGNNAEAVILR.E	gi|16131061|ref|NP_417638.1| transcription termination/antitermination L factor [Escherichia coli str. K-12 substr. MG1655]
PKA_1r.09658.09658.2.dta	3.2747	2	R.RFS*DIPIVMVTAK.I	gi|16130019|ref|NP_416583.1| DNA-binding response regulator in two-component regulatory system with BaeS [Escherichia coli str. K-12 substr. MG1655]
PKA_1r.09660.09660.2.dta	2.7439	2	K.HNPFLS*LVPEQGVK.L	gi|16128803|ref|NP_415356.1| predicted SAM-dependent methyltransferase [Escherichia coli str. K-12 substr. MG1655]
PKA_1r.09684.09684.2.dta	2.6483	2	R.IRAS*LPTIELALK.Q	gi|16130827|ref|NP_417401.1| phosphoglycerate kinase [Escherichia coli str. K-12 substr. MG1655]
PKA_1r.09749.09749.2.dta	3.2774	2	R.FHS*IMDIYAFR.V	gi|16131521|ref|NP_418107.1| bifunctional (p)ppGpp synthetase II/ guanosine-3',5'-bis pyrophosphate 3'-pyrophosphohydrolase [Escherichia coli str. K-12 substr. MG1655]
PKA_1r.09755.09755.3.dta	3.2552	3	K.RFS*LEGGDALIPM#LK.E	gi|16128701|ref|NP_415254.1| 2-oxoglutarate decarboxylase, thiamin-requiring [Escherichia coli str. K-12 substr. MG1655]
PKA_1r.09761.09761.4.dta	3.8145	4	R.NRELS*AEGFNFIGTGVSGGEEGALKGPSIMPGGQK.E	gi|16129970|ref|NP_416533.1| gluconate-6-phosphate dehydrogenase, decarboxylating [Escherichia coli str. K-12 substr. MG1655]
PKA_1r.09772.09772.3.dta	3.0374	3	R.APGS*DKWQQISWEEAFDR.I	gi|16131734|ref|NP_418330.1| formate dehydrogenase-O, large subunit [Escherichia coli str. K-12 substr. MG1655]
PKA_1r.09798.09798.3.dta	3.4975	3	K.S*RDDLQAVMAMVR.G	gi|90111132|ref|NP_414960.2| predicted nucleotide binding protein [Escherichia coli str. K-12 substr. MG1655]
PKA_1r.09813.09813.2.dta	2.6263	2	R.GILES*KFLELK.Q	gi|16129596|ref|NP_416155.1| pyridoxine 5'-phosphate oxidase [Escherichia coli str. K-12 substr. MG1655]
PKA_1r.09825.09825.3.dta	4.4924	3	R.RAS*AGRIT*AVIPYFGYAR.Q	gi|16129170|ref|NP_415725.1| phosphoribosylpyrophosphate synthase [Escherichia coli str. K-12 substr. MG1655]
PKA_1r.09851.09851.2.dta	3.3459	2	K.RLT*IYALLDSPR.A	gi|16129011|ref|NP_415566.1| glucan biosynthesis protein, periplasmic [Escherichia coli str. K-12 substr. MG1655]
PKA_1r.09876.09876.2.dta	2.3462	2	K.RFS*LEGGDALIPM#LK.E	gi|16128701|ref|NP_415254.1| 2-oxoglutarate decarboxylase, thiamin-requiring [Escherichia coli str. K-12 substr. MG1655]
PKA_1r.09919.09919.2.dta	2.3777	2	R.GGAGFSTGLKWS*LMPK.D	gi|16130219|ref|NP_416787.1| NADH:ubiquinone oxidoreductase, chain F [Escherichia coli str. K-12 substr. MG1655]
PKA_1r.09961.09961.3.dta	3.7944	3	R.AQEVRLT*GLEGEQLGIVSLR.E	gi|16129674|ref|NP_416233.1| protein chain initiation factor IF-3 [Escherichia coli str. K-12 substr. MG1655]
PKA_1r.10017.10017.4.dta	3.5074	4	R.VRLT*NGFEVTSYIGGEGHNLQEHS*VILIR.G	gi|16131221|ref|NP_417801.1| 30S ribosomal subunit protein S12 [Escherichia coli str. K-12 substr. MG1655]
PKA_1r.10046.10046.3.dta	3.5407	3	K.VKNVLS*S*GKVIVEGINLVK.K	gi|16131188|ref|NP_417768.1| 50S ribosomal subunit protein L24 [Escherichia coli str. K-12 substr. MG1655]
PKA_1r.10113.10113.3.dta	3.4615	3	R.KT*GFDEIYLPFR.A	gi|16130393|ref|NP_416963.1| fused predicted oxidoreductase: FeS binding subunit/NAD/FAD-binding subunit [Escherichia coli str. K-12 substr. MG1655]
PKA_1r.10129.10129.3.dta	4.4289	3	K.NVLSS*GKVIVEGINLVK.K	gi|16131188|ref|NP_417768.1| 50S ribosomal subunit protein L24 [Escherichia coli str. K-12 substr. MG1655]
PKA_1r.10247.10247.2.dta	2.4601	2	-.MKFVS*FNINGLR.A	gi|16129703|ref|NP_416263.1| exonuclease III [Escherichia coli str. K-12 substr. MG1655]
PKA_1r.10396.10396.3.dta	3.7527	3	K.WKEGEATLAPS*LDLVGKI.-	gi|16128588|ref|NP_415138.1| alkyl hydroperoxide reductase, C22 subunit [Escherichia coli str. K-12 substr. MG1655]
PKA_1r.10401.10401.3.dta	3.5765	3	R.KLS*LEPLIAHRGS*FES*FAQAVR.D	gi|16130029|ref|NP_416594.1| galactitol-1-phosphate dehydrogenase, Zn-dependent and NAD(P)-binding [Escherichia coli str. K-12 substr. MG1655]
PKA_1r.10450.10450.3.dta	3.5687	3	K.VDAT*KQYDINEAIALLK.E	gi|16131814|ref|NP_418411.1| 50S ribosomal subunit protein L1 [Escherichia coli str. K-12 substr. MG1655]
PKA_1r.10477.10477.2.dta	2.4844	2	R.FMS*LFDK.H	gi|90111271|ref|NP_415943.4| predicted protein [Escherichia coli str. K-12 substr. MG1655]
PKA_1r.10546.10546.3.dta	3.0294	3	R.SHNSGIIGPSAAS*FVADFR.A	gi|90111660|ref|NP_418320.2| predicted DNA-binding transcriptional regulator [Escherichia coli str. K-12 substr. MG1655]
PKA_1r.10584.10584.2.dta	2.5539	2	-.M#ETTKPS*FQDVLEFVR.L	gi|145698283|ref|NP_416511.4| conserved protein [Escherichia coli str. K-12 substr. MG1655]
PKA_1r.10657.10657.3.dta	3.0401	3	R.ARVS*RPS*ADTIIGELSGMAK.D	gi|49176329|ref|NP_417693.3| DNA-binding transcriptional dual regulator [Escherichia coli str. K-12 substr. MG1655]
PKA_1r.10711.10711.2.dta	2.8413	2	R.KLFLS*ILR.H	gi|16128160|ref|NP_414709.1| uridylyltransferase [Escherichia coli str. K-12 substr. MG1655]
PKA_1r.10861.10861.3.dta	4.1968	3	R.GFKT*EIIEESEGEVAGIK.S	gi|16130793|ref|NP_417367.1| peptide chain release factor RF-2 [Escherichia coli str. K-12 substr. MG1655]
PKA_1r.10918.10918.3.dta	3.2509	3	R.IDEVVVFHPLGEQHIAS*IAQIQLK.R	gi|16130513|ref|NP_417083.1| protein disaggregation chaperone [Escherichia coli str. K-12 substr. MG1655]
PKA_1r.10962.10962.2.dta	2.5101	2	K.RFS*LSGWEPILVNK.T	gi|16131944|ref|NP_418542.1| DNA-binding transcriptional dual regulator [Escherichia coli str. K-12 substr. MG1655]
PKA_1r.10979.10979.2.dta	2.5655	2	R.KLAS*GLYTWLPTGVR.V	gi|16128187|ref|NP_414736.1| prolyl-tRNA synthetase [Escherichia coli str. K-12 substr. MG1655]
PKA_1r.10991.10991.2.dta	2.9786	2	-.METTKPS*FQDVLEFVR.L	gi|145698283|ref|NP_416511.4| conserved protein [Escherichia coli str. K-12 substr. MG1655]
PKA_1r.11009.11009.3.dta	4.5354	3	K.GRAS*YTMEFLKYDEAPSNVAQAVIEAR.G	gi|16131219|ref|NP_417799.1| protein chain elongation factor EF-G, GTP-binding [Escherichia coli str. K-12 substr. MG1655]
PKA_1r.11019.11019.3.dta	4.2003	3	K.HGGFYLGS*IGGPAAVLAQGSIK.S	gi|16129570|ref|NP_416129.1| fumarate hydratase (fumarase A), aerobic Class I [Escherichia coli str. K-12 substr. MG1655]
PKA_1r.11070.11070.3.dta	3.9668	3	R.RS*T*IFPNMIGLTIAVHNGR.Q	gi|16131195|ref|NP_417775.1| 30S ribosomal subunit protein S19 [Escherichia coli str. K-12 substr. MG1655]
PKA_1r.11074.11074.3.dta	3.4713	3	K.KYT*LPVLILTAR.D	gi|16131939|ref|NP_418537.1| DNA-binding response regulator in two-component regulatory system with BasS [Escherichia coli str. K-12 substr. MG1655]
PKA_1r.11100.11100.2.dta	3.7998	2	K.RFS*LEGGDALIPMLK.E	gi|16128701|ref|NP_415254.1| 2-oxoglutarate decarboxylase, thiamin-requiring [Escherichia coli str. K-12 substr. MG1655]
PKA_1r.11279.11279.2.dta	2.465	2	R.S*IWMIGLHAFAK.R	gi|16130216|ref|NP_416784.1| NADH:ubiquinone oxidoreductase, chain I [Escherichia coli str. K-12 substr. MG1655]
PKA_1r.11342.11342.3.dta	3.2746	3	R.DVS*FDLHKGEILGIAGLVGAK.R	gi|16130087|ref|NP_416654.1| fused methyl-galactoside transporter subunits of ABC superfamily: ATP-binding components [Escherichia coli str. K-12 substr. MG1655]
PKA_1r.11412.11412.3.dta	3.2727	3	K.ERLS*LGDLDTLMPQDMINAKPISAAVK.E	gi|16131817|ref|NP_418414.1| RNA polymerase, beta subunit [Escherichia coli str. K-12 substr. MG1655]
PKA_1r.11475.11475.3.dta	3.1851	3	R.LHS*LLDEGSLVELGSELEPKDVLK.F	gi|16130251|ref|NP_416819.1| acetyl-CoA carboxylase, beta (carboxyltranferase) subunit [Escherichia coli str. K-12 substr. MG1655]
PKA_1r.11500.11500.3.dta	5.0946	3	R.FRQS*LGGLIEAYEAVAR.R	gi|16130401|ref|NP_416971.1| phosphoribosylaminoimidazole-succinocarboxamide synthetase [Escherichia coli str. K-12 substr. MG1655]
PKA_1r.11503.11503.2.dta	2.6714	2	R.GALKS*ILSELVR.Q	gi|16131198|ref|NP_417778.1| 50S ribosomal subunit protein L4 [Escherichia coli str. K-12 substr. MG1655]
PKA_1r.11526.11526.3.dta	4.6391	3	K.LGS*QFHIPHGLANALLICNVIR.Y	gi|16129202|ref|NP_415757.1| fused acetaldehyde-CoA dehydrogenase/iron-dependent alcohol dehydrogenase/pyruvate-formate lyase deactivase [Escherichia coli str. K-12 substr. MG1655]
PKA_1r.11552.11552.3.dta	3.8964	3	R.IIPYRGS*WLDFEFDPKDNLFVR.I	gi|16131817|ref|NP_418414.1| RNA polymerase, beta subunit [Escherichia coli str. K-12 substr. MG1655]
PKA_2.00339.00339.2.dta	2.5004	2	K.KPNS*ALR.K	gi|16131221|ref|NP_417801.1| 30S ribosomal subunit protein S12 [Escherichia coli str. K-12 substr. MG1655]
PKA_2.00413.00413.2.dta	2.9033	2	K.RGES*SGPDVSR.E	gi|16131769|ref|NP_418366.1| molecular chaperone and ATPase component of HslUV protease [Escherichia coli str. K-12 substr. MG1655]
PKA_2.00509.00509.2.dta	3.2802	2	R.KIS*NGEGVER.V	gi|16130527|ref|NP_417097.1| 50S ribosomal subunit protein L19 [Escherichia coli str. K-12 substr. MG1655]
PKA_2.00538.00538.2.dta	3.778	2	R.KIS*NGEGVER.V	gi|16130527|ref|NP_417097.1| 50S ribosomal subunit protein L19 [Escherichia coli str. K-12 substr. MG1655]
PKA_2.00647.00647.2.dta	2.6712	2	R.KIS*NGEGVER.V	gi|16130527|ref|NP_417097.1| 50S ribosomal subunit protein L19 [Escherichia coli str. K-12 substr. MG1655]
PKA_2.00679.00679.2.dta	2.6669	2	R.KIS*NGEGVER.V	gi|16130527|ref|NP_417097.1| 50S ribosomal subunit protein L19 [Escherichia coli str. K-12 substr. MG1655]
PKA_2.00761.00761.2.dta	2.5919	2	R.KIS*NGEGVER.V	gi|16130527|ref|NP_417097.1| 50S ribosomal subunit protein L19 [Escherichia coli str. K-12 substr. MG1655]
PKA_2.00801.00801.2.dta	2.7427	2	R.KWT*DQSGQDR.Y	gi|16131885|ref|NP_418483.1| single-stranded DNA-binding protein [Escherichia coli str. K-12 substr. MG1655]
PKA_2.00847.00847.2.dta	2.6347	2	K.AKVS*TATVSR.A	gi|16131772|ref|NP_418369.1| DNA-binding transcriptional dual regulator [Escherichia coli str. K-12 substr. MG1655]
PKA_2.01020.01020.2.dta	2.6774	2	K.KAS*AIVTNR.G	gi|16129658|ref|NP_416217.1| phosphoenolpyruvate synthase [Escherichia coli str. K-12 substr. MG1655]
PKA_2.01048.01048.2.dta	2.692	2	R.GKS*VDIDR.A	gi|16129261|ref|NP_415816.1| gamma-Glu-gamma-aminobutyraldehyde dehydrogenase, NAD(P)H-dependent [Escherichia coli str. K-12 substr. MG1655]
PKA_2.01108.01108.2.dta	3.012	2	R.AKAS*QLDEAR.R	gi|16130440|ref|NP_417010.1| 1-hydroxy-2-methyl-2-(E)-butenyl 4-diphosphate synthase [Escherichia coli str. K-12 substr. MG1655]
PKA_2.01141.01141.3.dta	3.2571	3	R.ERM#NPETNS*IANR.Q	gi|49176207|ref|NP_416791.3| NADH:ubiquinone oxidoreductase, membrane subunit A [Escherichia coli str. K-12 substr. MG1655]
PKA_2.01213.01213.2.dta	2.5532	2	R.FTRYS*GEQTQK.A	gi|16130738|ref|NP_417311.1| predicted oxidoreductase, NADP(H)-dependent aldo-keto reductase [Escherichia coli str. K-12 substr. MG1655]
PKA_2.01219.01219.2.dta	2.6516	2	K.KIT*LQNGK.L	gi|16129099|ref|NP_415654.1| e14 prophage; isocitrate dehydrogenase, specific for NADP+ [Escherichia coli str. K-12 substr. MG1655]
PKA_2.01221.01221.2.dta	2.6597	2	R.IKS*NITPTR.K	gi|16130251|ref|NP_416819.1| acetyl-CoA carboxylase, beta (carboxyltranferase) subunit [Escherichia coli str. K-12 substr. MG1655]
PKA_2.01224.01224.2.dta	3.2286	2	K.HAVT*EASPM#VK.A	gi|221800783|ref|NP_418621.2| 30S ribosomal subunit protein S6 [Escherichia coli str. K-12 substr. MG1655]
PKA_2.01241.01241.2.dta	2.6804	2	K.KAS*VEIDR.K	gi|16129672|ref|NP_416231.1| 50S ribosomal subunit protein L20 [Escherichia coli str. K-12 substr. MG1655]
PKA_2.01245.01245.2.dta	2.8328	2	R.RVS*AALDK.V	gi|16131335|ref|NP_417920.1| predicted transporter subunit: ATP-binding component of ABC superfamily [Escherichia coli str. K-12 substr. MG1655]
PKA_2.01252.01252.2.dta	2.63	2	R.LNS*LGHPR.I	gi|16131572|ref|NP_418159.1| protein C5 component of RNase P [Escherichia coli str. K-12 substr. MG1655]
PKA_2.01300.01300.2.dta	2.5173	2	R.IRGES*VTPK.M	gi|49176356|ref|YP_026222.1| DNA-binding transcriptional repressor [Escherichia coli str. K-12 substr. MG1655]
PKA_2.01304.01304.3.dta	3.6405	3	K.RKT*T*LAPNTQTASPR.A	gi|49176012|ref|NP_414879.3| DNA-binding transcriptional repressor [Escherichia coli str. K-12 substr. MG1655]
PKA_2.01343.01343.2.dta	2.7384	2	K.VKNVLSS*GK.V	gi|16131188|ref|NP_417768.1| 50S ribosomal subunit protein L24 [Escherichia coli str. K-12 substr. MG1655]
PKA_2.01369.01369.2.dta	3.5627	2	K.GRS*QGVAAYGAK.E	gi|145698291|ref|NP_416789.2| NADH:ubiquinone oxidoreductase, chain C,D [Escherichia coli str. K-12 substr. MG1655]
PKA_2.01396.01396.2.dta	2.5085	2	-.M#KT*LIAR.H	gi|16130033|ref|NP_416598.1| D-tagatose 1,6-bisphosphate aldolase 2, subunit [Escherichia coli str. K-12 substr. MG1655]
PKA_2.01601.01601.2.dta	2.6988	2	R.TKFT*NVGR.M	gi|16131000|ref|NP_417576.1| predicted DNA-binding transcriptional regulator [Escherichia coli str. K-12 substr. MG1655]
PKA_2.01646.01646.2.dta	2.6004	2	K.VKNVLS*SGK.V	gi|16131188|ref|NP_417768.1| 50S ribosomal subunit protein L24 [Escherichia coli str. K-12 substr. MG1655]
PKA_2.01670.01670.2.dta	2.4824	2	R.S*GDTYLHR.I	gi|16130501|ref|NP_417071.1| ATP-dependent RNA helicase [Escherichia coli str. K-12 substr. MG1655]
PKA_2.01757.01757.2.dta	2.5451	2	K.VRS*VLER.T	gi|16130604|ref|NP_417177.1| alanyl-tRNA synthetase [Escherichia coli str. K-12 substr. MG1655]
PKA_2.01828.01828.2.dta	2.5871	2	K.VRS*VLER.T	gi|16130604|ref|NP_417177.1| alanyl-tRNA synthetase [Escherichia coli str. K-12 substr. MG1655]
PKA_2.01905.01905.2.dta	2.7014	2	K.KLS*LTQK.E	gi|16130917|ref|NP_417493.1| predicted DNA-binding transcriptional regulator [Escherichia coli str. K-12 substr. MG1655]
PKA_2.01936.01936.2.dta	2.4885	2	R.RLS*DEVADR.V	gi|16131475|ref|NP_418061.1| DNA-binding transcriptional repressor [Escherichia coli str. K-12 substr. MG1655]
PKA_2.01986.01986.2.dta	2.9108	2	K.ARAT*VLATGGAGR.I	gi|16128698|ref|NP_415251.1| succinate dehydrogenase, flavoprotein subunit [Escherichia coli str. K-12 substr. MG1655]
PKA_2.02019.02019.2.dta	2.5137	2	R.RMS*IGEAK.A	gi|16130963|ref|NP_417539.1| RNA polymerase, sigma 70 (sigma D) factor [Escherichia coli str. K-12 substr. MG1655]
PKA_2.02020.02020.2.dta	2.484	2	K.TKYT*LER.V	gi|16130670|ref|NP_417243.1| sulfite reductase, beta subunit, NAD(P)-binding, heme-binding [Escherichia coli str. K-12 substr. MG1655]
PKA_2.02031.02031.2.dta	2.4826	2	R.KGS*LFNK.V	gi|16129725|ref|NP_416285.1| predicted oxidoreductase [Escherichia coli str. K-12 substr. MG1655]
PKA_2.02042.02042.2.dta	2.5351	2	R.KAS*EISIK.A	gi|16132198|ref|NP_418798.1| 2-deoxyribose-5-phosphate aldolase, NAD(P)-linked [Escherichia coli str. K-12 substr. MG1655]
PKA_2.02079.02079.2.dta	2.933	2	R.ERMNPETNS*IANR.Q	gi|49176207|ref|NP_416791.3| NADH:ubiquinone oxidoreductase, membrane subunit A [Escherichia coli str. K-12 substr. MG1655]
PKA_2.02112.02112.2.dta	2.7219	2	K.KCT*GASPSEFR.A	gi|16128058|ref|NP_414606.1| DNA-binding transcriptional dual regulator [Escherichia coli str. K-12 substr. MG1655]
PKA_2.02156.02156.2.dta	3.0356	2	R.HNGS*FDTVDCR.F	gi|16131040|ref|NP_417617.1| conserved protein [Escherichia coli str. K-12 substr. MG1655]
PKA_2.02189.02189.2.dta	2.5439	2	R.KAS*MVLR.L	gi|16129199|ref|NP_415754.1| thymidine kinase/deoxyuridine kinase [Escherichia coli str. K-12 substr. MG1655]
PKA_2.02219.02219.2.dta	2.9409	2	K.RGT*LDLSK.L	gi|90111550|ref|NP_417631.2| ATP-dependent RNA helicase [Escherichia coli str. K-12 substr. MG1655]
PKA_2.02228.02228.2.dta	2.824	2	K.HQGNT*IEIR.Y	gi|90111647|ref|NP_418204.2| predicted cytoplasmic sugar-binding protein [Escherichia coli str. K-12 substr. MG1655]
PKA_2.02251.02251.2.dta	3.8959	2	K.HAVT*EASPMVK.A	gi|221800783|ref|NP_418621.2| 30S ribosomal subunit protein S6 [Escherichia coli str. K-12 substr. MG1655]
PKA_2.02274.02274.2.dta	2.8711	2	-.MNKS*QLIDK.I	gi|16128425|ref|NP_414974.1| HU, DNA-binding transcriptional regulator, beta subunit [Escherichia coli str. K-12 substr. MG1655]
PKA_2.02310.02310.2.dta	2.4757	2	R.RPT*GGVESLR.A	gi|16131794|ref|NP_418391.1| phosphoenolpyruvate carboxylase [Escherichia coli str. K-12 substr. MG1655]
PKA_2.02321.02321.2.dta	2.9282	2	K.GKS*LDEAQAIK.N	gi|16130454|ref|NP_417024.1| scaffold protein [Escherichia coli str. K-12 substr. MG1655]
PKA_2.02345.02345.2.dta	2.5326	2	R.VKT*LLNEK.A	gi|16131191|ref|NP_417771.1| 50S ribosomal subunit protein L29 [Escherichia coli str. K-12 substr. MG1655]
PKA_2.02368.02368.2.dta	2.9204	2	R.RT*ELDIEK.A	gi|16130533|ref|NP_417104.1| heat shock protein [Escherichia coli str. K-12 substr. MG1655]
PKA_2.02456.02456.3.dta	3.1441	3	R.KKLT*S*GPALPGK.L	gi|16130926|ref|NP_417502.1| DNA topoisomerase IV, subunit B [Escherichia coli str. K-12 substr. MG1655]
PKA_2.02480.02480.2.dta	2.9808	2	R.RET*LEDAVK.H	gi|16130504|ref|NP_417074.1| pyruvate formate lyase subunit [Escherichia coli str. K-12 substr. MG1655]
PKA_2.02520.02520.2.dta	2.655	2	K.SRQT*FVVR.S	gi|16131955|ref|NP_418553.1| lysine tRNA synthetase, inducible [Escherichia coli str. K-12 substr. MG1655]
PKA_2.02530.02530.2.dta	2.4812	2	R.KLS*YTGEVK.A	gi|16128002|ref|NP_414549.1| transaldolase B [Escherichia coli str. K-12 substr. MG1655]
PKA_2.02531.02531.2.dta	3.131	2	R.AKDGLALS*SR.N	gi|16128126|ref|NP_414675.1| pantothenate synthetase [Escherichia coli str. K-12 substr. MG1655]
PKA_2.02546.02546.2.dta	2.5543	2	R.RAT*DAILSR.E	gi|16130780|ref|NP_417354.1| predicted oxidoreductase, Fe-S subunit [Escherichia coli str. K-12 substr. MG1655]
PKA_2.02635.02635.2.dta	2.5509	2	R.SRS*LKQLEE.-	gi|16129675|ref|NP_416234.1| threonyl-tRNA synthetase [Escherichia coli str. K-12 substr. MG1655]
PKA_2.02688.02688.2.dta	2.5819	2	R.HLES*VVTNK.I	gi|16128156|ref|NP_414705.1| conserved protein [Escherichia coli str. K-12 substr. MG1655]
PKA_2.02706.02706.2.dta	2.9368	2	K.GGGIS*GQAGAIR.H	gi|16131120|ref|NP_417697.1| 30S ribosomal subunit protein S9 [Escherichia coli str. K-12 substr. MG1655]
PKA_2.02788.02788.2.dta	2.979	2	R.RCQT*IDTLER.V	gi|16128444|ref|NP_414993.1| modulator of gene expression, with H-NS [Escherichia coli str. K-12 substr. MG1655]
PKA_2.02829.02829.2.dta	2.6166	2	R.VKS*VTFCAR.S	gi|16130232|ref|NP_416800.1| phosphate acetyltransferase [Escherichia coli str. K-12 substr. MG1655]
PKA_2.02874.02874.3.dta	4.1113	3	K.APAKESAPAAAAPAAQPALAARS*EK.R	gi|16128702|ref|NP_415255.1| dihydrolipoyltranssuccinase [Escherichia coli str. K-12 substr. MG1655]
PKA_2.02970.02970.2.dta	2.8996	2	R.ART*ADAILR.L	gi|16129770|ref|NP_416330.1| fused predicted membrane protein/conserved protein [Escherichia coli str. K-12 substr. MG1655]
PKA_2.02982.02982.2.dta	3.241	2	R.KGMS*VTEVER.W	gi|16131845|ref|NP_418443.1| homocysteine-N5-methyltetrahydrofolate transmethylase, B12-dependent [Escherichia coli str. K-12 substr. MG1655]
PKA_2.03005.03005.2.dta	2.6224	2	K.LRSS*GVYSYK.V	gi|16131292|ref|NP_417875.1| 4-alpha-glucanotransferase (amylomaltase) [Escherichia coli str. K-12 substr. MG1655]
PKA_2.03137.03137.3.dta	3.2907	3	R.RT*IQVLQR.R	gi|16130513|ref|NP_417083.1| protein disaggregation chaperone [Escherichia coli str. K-12 substr. MG1655]
PKA_2.03201.03201.2.dta	3.5856	2	R.AQYVVTRDT*IK.A	gi|16130963|ref|NP_417539.1| RNA polymerase, sigma 70 (sigma D) factor [Escherichia coli str. K-12 substr. MG1655]
PKA_2.03211.03211.2.dta	2.7332	2	K.RVS*QASDSYYYR.A	gi|16130201|ref|NP_416769.1| conserved protein [Escherichia coli str. K-12 substr. MG1655]
PKA_2.03226.03226.2.dta	2.7442	2	K.LQAKAS*DLVSR.K	gi|90111097|ref|NP_414731.2| modulator of Rho-dependent transcription termination [Escherichia coli str. K-12 substr. MG1655]
PKA_2.03246.03246.2.dta	3.2451	2	R.TKS*FYYCAR.T	gi|16130021|ref|NP_416585.1| predicted peptidase [Escherichia coli str. K-12 substr. MG1655]
PKA_2.03278.03278.3.dta	3.9827	3	R.HGAS*CPVGMGVSCSADR.N	gi|16129570|ref|NP_416129.1| fumarate hydratase (fumarase A), aerobic Class I [Escherichia coli str. K-12 substr. MG1655]
PKA_2.03278.03278.3.dta	3.9827	3	R.HGAS*CPVGMGVSCSADR.N	gi|16131948|ref|NP_418546.1| anaerobic class I fumarate hydratase (fumarase B) [Escherichia coli str. K-12 substr. MG1655]
PKA_2.03280.03280.2.dta	2.4595	2	R.KGS*FNGMVAR.T	gi|16131581|ref|NP_418169.1| chromate reductase, Class I, flavoprotein [Escherichia coli str. K-12 substr. MG1655]
PKA_2.03374.03374.2.dta	2.6692	2	R.THGS*ALFTR.G	gi|145698316|ref|NP_417633.4| polynucleotide phosphorylase/polyadenylase [Escherichia coli str. K-12 substr. MG1655]
PKA_2.03381.03381.2.dta	2.9396	2	K.RWT*ADVEAGK.W	gi|16131704|ref|NP_418300.1| DNA polymerase I [Escherichia coli str. K-12 substr. MG1655]
PKA_2.03412.03412.2.dta	2.4719	2	R.YNRET*LEIK.Y	gi|16131884|ref|NP_418482.1| ATPase and DNA damage recognition protein of nucleotide excision repair excinuclease UvrABC [Escherichia coli str. K-12 substr. MG1655]
PKA_2.03456.03456.3.dta	3.8306	3	-.M#KS*VVNDTDGIVR.V	gi|16130029|ref|NP_416594.1| galactitol-1-phosphate dehydrogenase, Zn-dependent and NAD(P)-binding [Escherichia coli str. K-12 substr. MG1655]
PKA_2.03471.03471.2.dta	2.9228	2	R.HS*IEYLR.E	gi|16128897|ref|NP_415450.1| asparaginyl tRNA synthetase [Escherichia coli str. K-12 substr. MG1655]
PKA_2.03513.03513.2.dta	3.6921	2	R.HNT*LGTEFK.A	gi|16129197|ref|NP_415752.1| glucose-1-phosphate uridylyltransferase [Escherichia coli str. K-12 substr. MG1655]
PKA_2.03551.03551.2.dta	3.1588	2	K.RNS*LDALCAR.Y	gi|16128202|ref|NP_414751.1| DNA polymerase III epsilon subunit [Escherichia coli str. K-12 substr. MG1655]
PKA_2.03647.03647.2.dta	2.5013	2	K.GIKDVS*FDR.S	gi|16131183|ref|NP_417763.1| 50S ribosomal subunit protein L18 [Escherichia coli str. K-12 substr. MG1655]
PKA_2.03651.03651.3.dta	3.4156	3	R.KGS*S*LQQGFQKPAQAVNR.D	gi|16131060|ref|NP_417637.1| fused protein chain initiation factor 2, IF2: membrane protein/conserved protein [Escherichia coli str. K-12 substr. MG1655]
PKA_2.03666.03666.3.dta	3.7228	3	R.GNRVT*VDGEIVR.N	gi|16130121|ref|NP_416688.1| 16S rRNA pseudouridylate 516 synthase [Escherichia coli str. K-12 substr. MG1655]
PKA_2.03775.03775.2.dta	3.5029	2	R.HAECS*VLVVR.-	gi|90111262|ref|NP_415894.4| stress-induced protein, ATP-binding protein [Escherichia coli str. K-12 substr. MG1655]
PKA_2.03829.03829.2.dta	2.7215	2	K.ISNGNWQS*HIGR.S	gi|16128980|ref|NP_415534.1| fused DNA-binding transcriptional regulator/proline dehydrogenase/pyrroline-5-carboxylate dehydrogenase [Escherichia coli str. K-12 substr. MG1655]
PKA_2.03838.03838.2.dta	2.5491	2	R.SKGES*SLFSR.D	gi|16131817|ref|NP_418414.1| RNA polymerase, beta subunit [Escherichia coli str. K-12 substr. MG1655]
PKA_2.03907.03907.3.dta	3.2922	3	R.GKS*RPIVEPDNVPMDM#SPK.A	gi|16128747|ref|NP_415300.1| excinulease of nucleotide excision repair, DNA damage recognition component [Escherichia coli str. K-12 substr. MG1655]
PKA_2.03911.03911.3.dta	4.958	3	R.YAGRPAS*ASPAVGYMSVHQK.Q	gi|16128701|ref|NP_415254.1| 2-oxoglutarate decarboxylase, thiamin-requiring [Escherichia coli str. K-12 substr. MG1655]
PKA_2.03929.03929.2.dta	2.6751	2	R.RDT*VYAFSR.I	gi|16128500|ref|NP_415049.1| allantoate amidohydrolase [Escherichia coli str. K-12 substr. MG1655]
PKA_2.04024.04024.3.dta	3.5857	3	R.KT*MGKPPVDDDIPAEEQVR.I	gi|16131263|ref|NP_417844.1| phosphoglycolate phosphatase [Escherichia coli str. K-12 substr. MG1655]
PKA_2.04045.04045.3.dta	3.4751	3	K.RFHT*LS*GGKPQVEGAEDYTDSDD.-	gi|16131624|ref|NP_418213.1| conserved protein [Escherichia coli str. K-12 substr. MG1655]
PKA_2.04049.04049.3.dta	3.3616	3	R.GKS*RPIVEPDNVPM#DMSPK.A	gi|16128747|ref|NP_415300.1| excinulease of nucleotide excision repair, DNA damage recognition component [Escherichia coli str. K-12 substr. MG1655]
PKA_2.04055.04055.2.dta	3.6109	2	-.MKS*VVNDTDGIVR.V	gi|16130029|ref|NP_416594.1| galactitol-1-phosphate dehydrogenase, Zn-dependent and NAD(P)-binding [Escherichia coli str. K-12 substr. MG1655]
PKA_2.04101.04101.3.dta	3.3696	3	K.MAQGERT*LIVPPDAPM#RPK.R	gi|90111550|ref|NP_417631.2| ATP-dependent RNA helicase [Escherichia coli str. K-12 substr. MG1655]
PKA_2.04134.04134.2.dta	4.8601	2	K.VKS*LIADEDNPNLK.L	gi|16128149|ref|NP_414698.1| conserved protein [Escherichia coli str. K-12 substr. MG1655]
PKA_2.04176.04176.3.dta	4.121	3	R.LLAEHNLDASAIKGT*GVGGR.L	gi|16128702|ref|NP_415255.1| dihydrolipoyltranssuccinase [Escherichia coli str. K-12 substr. MG1655]
PKA_2.04196.04196.2.dta	2.7775	2	R.GKS*VEEILGK.-	gi|16131182|ref|NP_417762.1| 30S ribosomal subunit protein S5 [Escherichia coli str. K-12 substr. MG1655]
PKA_2.04239.04239.2.dta	2.5434	2	R.FWVES*EKR.F	gi|16131508|ref|NP_418094.1| 50S ribosomal subunit protein L28 [Escherichia coli str. K-12 substr. MG1655]
PKA_2.04251.04251.2.dta	2.5072	2	R.VKS*QAIEGLVK.A	gi|16128421|ref|NP_414970.1| peptidyl-prolyl cis/trans isomerase (trigger factor) [Escherichia coli str. K-12 substr. MG1655]
PKA_2.04264.04264.2.dta	2.9029	2	R.GERS*FDIYSR.L	gi|16128422|ref|NP_414971.1| proteolytic subunit of ClpA-ClpP and ClpX-ClpP ATP-dependent serine proteases [Escherichia coli str. K-12 substr. MG1655]
PKA_2.04314.04314.2.dta	2.7192	2	R.RLQT*IIER.G	gi|90111415|ref|NP_416797.2| conserved protein [Escherichia coli str. K-12 substr. MG1655]
PKA_2.04363.04363.2.dta	2.6516	2	K.AGAWYS*YKGEK.I	gi|16130606|ref|NP_417179.1| DNA strand exchange and recombination protein with protease and nuclease activity [Escherichia coli str. K-12 substr. MG1655]
PKA_2.04532.04532.2.dta	2.9753	2	R.GLHS*AFTVR.K	gi|16130527|ref|NP_417097.1| 50S ribosomal subunit protein L19 [Escherichia coli str. K-12 substr. MG1655]
PKA_2.04645.04645.3.dta	3.1988	3	K.EHGYETVVM#GAS*FR.N	gi|16128002|ref|NP_414549.1| transaldolase B [Escherichia coli str. K-12 substr. MG1655]
PKA_2.04746.04746.2.dta	2.6134	2	K.TKS*WTLVR.V	gi|16131190|ref|NP_417770.1| 30S ribosomal subunit protein S17 [Escherichia coli str. K-12 substr. MG1655]
PKA_2.04881.04881.2.dta	2.8811	2	R.TRVS*EISIVGR.N	gi|16130166|ref|NP_416734.1| DNA gyrase (type II topoisomerase), subunit A [Escherichia coli str. K-12 substr. MG1655]
PKA_2.05263.05263.3.dta	3.1585	3	R.VGGS*T*YQVPVEVRPVRR.N	gi|16131220|ref|NP_417800.1| 30S ribosomal subunit protein S7 [Escherichia coli str. K-12 substr. MG1655]
PKA_2.05318.05318.3.dta	3.6094	3	R.KAS*IPEGVWTK.C	gi|16130251|ref|NP_416819.1| acetyl-CoA carboxylase, beta (carboxyltranferase) subunit [Escherichia coli str. K-12 substr. MG1655]
PKA_2.05408.05408.3.dta	3.7693	3	R.SGS*IKSPIWR.S	gi|16131198|ref|NP_417778.1| 50S ribosomal subunit protein L4 [Escherichia coli str. K-12 substr. MG1655]
PKA_2.05419.05419.2.dta	3.1953	2	R.REGT*DLFLK.S	gi|16131175|ref|NP_417755.1| 30S ribosomal subunit protein S4 [Escherichia coli str. K-12 substr. MG1655]
PKA_2.05421.05421.2.dta	2.9076	2	K.KVT*WAASLGDR.S	gi|90111587|ref|YP_026216.2| transcription elongation factor [Escherichia coli str. K-12 substr. MG1655]
PKA_2.05462.05462.2.dta	2.5003	2	R.IRS*VGEMAENQFR.V	gi|16131817|ref|NP_418414.1| RNA polymerase, beta subunit [Escherichia coli str. K-12 substr. MG1655]
PKA_2.05507.05507.3.dta	3.6783	3	R.YHS*IIIM#TDADVDGSHIR.T	gi|49176395|ref|YP_026241.1| DNA gyrase, subunit B [Escherichia coli str. K-12 substr. MG1655]
PKA_2.05540.05540.2.dta	3.1463	2	K.HFS*VNQMINK.E	gi|16129595|ref|NP_416154.1| tyrosyl-tRNA synthetase [Escherichia coli str. K-12 substr. MG1655]
PKA_2.05576.05576.2.dta	2.5347	2	K.IHIGLDNYS*GGR.A	gi|16131609|ref|NP_418197.1| glucose-inhibited cell-division protein [Escherichia coli str. K-12 substr. MG1655]
PKA_2.05600.05600.3.dta	3.2571	3	R.KIS*VMGHGM#GIPSCSIYTK.E	gi|16132201|ref|NP_418801.1| purine-nucleoside phosphorylase [Escherichia coli str. K-12 substr. MG1655]
PKA_2.05737.05737.3.dta	4.0752	3	K.MEKS*IVVAIER.F	gi|16131190|ref|NP_417770.1| 30S ribosomal subunit protein S17 [Escherichia coli str. K-12 substr. MG1655]
PKA_2.05783.05783.2.dta	3.3401	2	K.HQFAQS*LNYEIAK.T	gi|16130232|ref|NP_416800.1| phosphate acetyltransferase [Escherichia coli str. K-12 substr. MG1655]
PKA_2.05822.05822.2.dta	3.1007	2	R.KET*LVEYGFR.L	gi|16128747|ref|NP_415300.1| excinulease of nucleotide excision repair, DNA damage recognition component [Escherichia coli str. K-12 substr. MG1655]
PKA_2.05844.05844.2.dta	3.48	2	K.IHCS*ILAEDAIK.A	gi|16130454|ref|NP_417024.1| scaffold protein [Escherichia coli str. K-12 substr. MG1655]
PKA_2.05876.05876.2.dta	3.0705	2	K.IHCS*ILAEDAIK.A	gi|16130454|ref|NP_417024.1| scaffold protein [Escherichia coli str. K-12 substr. MG1655]
PKA_2.05885.05885.3.dta	3.0909	3	R.VDS*ASEFKGYDHLELNGK.V	gi|16130604|ref|NP_417177.1| alanyl-tRNA synthetase [Escherichia coli str. K-12 substr. MG1655]
PKA_2.06140.06140.3.dta	3.2598	3	R.VAALLCHDTFTHPQPTAPEVQKPT*LH.-	gi|90111511|ref|NP_417385.4| predicted protein [Escherichia coli str. K-12 substr. MG1655]
PKA_2.06156.06156.3.dta	3.3852	3	K.AGVDVLGISTDKPEKLS*R.F	gi|16130405|ref|NP_416975.1| thiol peroxidase, thioredoxin-dependent [Escherichia coli str. K-12 substr. MG1655]
PKA_2.06266.06266.3.dta	4.2012	3	K.DLEHPIEVPVGKAT*LGR.I	gi|16131600|ref|NP_418188.1| F1 sector of membrane-bound ATP synthase, beta subunit [Escherichia coli str. K-12 substr. MG1655]
PKA_2.06267.06267.2.dta	3.1986	2	K.EHGYETVVMGAS*FR.N	gi|16128002|ref|NP_414549.1| transaldolase B [Escherichia coli str. K-12 substr. MG1655]
PKA_2.06384.06384.2.dta	2.8564	2	R.LKS*LTLLAR.Q	gi|16128980|ref|NP_415534.1| fused DNA-binding transcriptional regulator/proline dehydrogenase/pyrroline-5-carboxylate dehydrogenase [Escherichia coli str. K-12 substr. MG1655]
PKA_2.06423.06423.2.dta	3.0376	2	K.EHGYETVVMGAS*FR.N	gi|16128002|ref|NP_414549.1| transaldolase B [Escherichia coli str. K-12 substr. MG1655]
PKA_2.06526.06526.3.dta	4.2963	3	R.HGS*GIVCLCITEDR.R	gi|16130937|ref|NP_417513.1| 3,4-dihydroxy-2-butanone-4-phosphate synthase [Escherichia coli str. K-12 substr. MG1655]
PKA_2.06538.06538.3.dta	3.0938	3	K.VEADCRAT*LGEVGNAEHMLR.V	gi|16131196|ref|NP_417776.1| 50S ribosomal subunit protein L2 [Escherichia coli str. K-12 substr. MG1655]
PKA_2.06561.06561.3.dta	3.6687	3	R.HQS*DDYPHNPNTEDLSQFSYTVR.N	gi|90111286|ref|NP_416015.2| conserved protein [Escherichia coli str. K-12 substr. MG1655]
PKA_2.06563.06563.3.dta	3.3936	3	K.AES*KGASPLSAGDVTNDLSHVR.K	gi|16131470|ref|NP_418056.1| fused mannitol-specific PTS enzymes: IIA components/IIB components/IIC components [Escherichia coli str. K-12 substr. MG1655]
PKA_2.06570.06570.3.dta	3.8883	3	R.TGFHNGEPVKTS*MVSLCEQLSK.L	gi|16128803|ref|NP_415356.1| predicted SAM-dependent methyltransferase [Escherichia coli str. K-12 substr. MG1655]
PKA_2.06603.06603.3.dta	4.0215	3	R.SEKDS*M#GAIDVPADKLWGAQTQR.S	gi|16129569|ref|NP_416128.1| fumarate hydratase (fumarase C),aerobic Class II [Escherichia coli str. K-12 substr. MG1655]
PKA_2.06671.06671.3.dta	3.7809	3	R.GPAIAQAFDAEGKPS*KAAEGWAR.G	gi|16131430|ref|NP_418016.1| glycine tRNA synthetase, beta subunit [Escherichia coli str. K-12 substr. MG1655]
PKA_2.06677.06677.3.dta	3.9131	3	R.YHS*IIIMTDADVDGSHIR.T	gi|49176395|ref|YP_026241.1| DNA gyrase, subunit B [Escherichia coli str. K-12 substr. MG1655]
PKA_2.06727.06727.2.dta	2.8567	2	-.MQGS*VTEFLKPR.L	gi|16131174|ref|NP_417754.1| RNA polymerase, alpha subunit [Escherichia coli str. K-12 substr. MG1655]
PKA_2.06805.06805.3.dta	4.3902	3	R.THAPVDFDTAVAST*ITSHDAGYINK.Q	gi|16128870|ref|NP_415423.1| pyruvate formate lyase I [Escherichia coli str. K-12 substr. MG1655]
PKA_2.06834.06834.3.dta	3.3648	3	R.AQDFTTFKDGQTAMS*IHVMQGER.E	gi|16130451|ref|NP_417021.1| DnaK-like molecular chaperone specific for IscU [Escherichia coli str. K-12 substr. MG1655]
PKA_2.06867.06867.2.dta	2.8229	2	K.KFT*ALGPYIR.E	gi|16128226|ref|NP_414775.1| DNA-binding transcriptional regulator [Escherichia coli str. K-12 substr. MG1655]
PKA_2.06875.06875.2.dta	2.711	2	K.GRAS*YTMEFLK.Y	gi|16131219|ref|NP_417799.1| protein chain elongation factor EF-G, GTP-binding [Escherichia coli str. K-12 substr. MG1655]
PKA_2.06928.06928.2.dta	3.4805	2	R.KIS*WM#EIYTGEK.S	gi|16129099|ref|NP_415654.1| e14 prophage; isocitrate dehydrogenase, specific for NADP+ [Escherichia coli str. K-12 substr. MG1655]
PKA_2.07168.07168.2.dta	2.9256	2	R.GFGS*FSLHYR.A	gi|16128879|ref|NP_415432.1| integration host factor (IHF), DNA-binding protein, beta subunit [Escherichia coli str. K-12 substr. MG1655]
PKA_2.07251.07251.3.dta	3.957	3	R.EGT*LHKGDIVLCGFEYGR.V	gi|16131060|ref|NP_417637.1| fused protein chain initiation factor 2, IF2: membrane protein/conserved protein [Escherichia coli str. K-12 substr. MG1655]
PKA_2.07297.07297.2.dta	2.85	2	R.GFGS*FSLHYR.A	gi|16128879|ref|NP_415432.1| integration host factor (IHF), DNA-binding protein, beta subunit [Escherichia coli str. K-12 substr. MG1655]
PKA_2.07474.07474.3.dta	3.5442	3	K.IDEVFIGS*CM#TNIGHFR.A	gi|16128111|ref|NP_414660.1| bifunctional aconitate hydratase 2/2-methylisocitrate dehydratase [Escherichia coli str. K-12 substr. MG1655]
PKA_2.07535.07535.3.dta	4.141	3	R.LEYDPNRS*ANIALVLYKDGER.R	gi|16131196|ref|NP_417776.1| 50S ribosomal subunit protein L2 [Escherichia coli str. K-12 substr. MG1655]
PKA_2.07632.07632.3.dta	3.1872	3	R.YCDS*VVCHINGYQGIQAALEKK.L	gi|16130220|ref|NP_416788.1| NADH:ubiquinone oxidoreductase, chain E [Escherichia coli str. K-12 substr. MG1655]
PKA_2.07806.07806.3.dta	3.2047	3	K.AHLAPFVPGHS*VVQIEGM#LTR.Q	gi|16130805|ref|NP_417379.1| glycine decarboxylase, PLP-dependent, subunit (protein P) of glycine cleavage complex [Escherichia coli str. K-12 substr. MG1655]
PKA_2.07838.07838.3.dta	3.3542	3	R.GGVS*LRPGDGVIHSWLNR.M	gi|16128111|ref|NP_414660.1| bifunctional aconitate hydratase 2/2-methylisocitrate dehydratase [Escherichia coli str. K-12 substr. MG1655]
PKA_2.07882.07882.3.dta	5.6503	3	K.FCRFT*AEGVQEIDYKDIATLK.N	gi|16132024|ref|NP_418623.1| 30S ribosomal subunit protein S18 [Escherichia coli str. K-12 substr. MG1655]
PKA_2.07885.07885.3.dta	3.3161	3	R.VGDLARMS*ELQYGKIPELEK.Q	gi|16130513|ref|NP_417083.1| protein disaggregation chaperone [Escherichia coli str. K-12 substr. MG1655]
PKA_2.07905.07905.3.dta	3.4509	3	R.RS*T*IFPNM#IGLTIAVHNGR.Q	gi|16131195|ref|NP_417775.1| 30S ribosomal subunit protein S19 [Escherichia coli str. K-12 substr. MG1655]
PKA_2.07972.07972.3.dta	3.3519	3	R.LEYDPNRS*ANIALVLYK.D	gi|16131196|ref|NP_417776.1| 50S ribosomal subunit protein L2 [Escherichia coli str. K-12 substr. MG1655]
PKA_2.08041.08041.2.dta	2.742	2	R.KIS*WMEIYTGEK.S	gi|16129099|ref|NP_415654.1| e14 prophage; isocitrate dehydrogenase, specific for NADP+ [Escherichia coli str. K-12 substr. MG1655]
PKA_2.08067.08067.3.dta	4.1035	3	R.RGS*LPIALDEVITDGHK.R	gi|16129202|ref|NP_415757.1| fused acetaldehyde-CoA dehydrogenase/iron-dependent alcohol dehydrogenase/pyruvate-formate lyase deactivase [Escherichia coli str. K-12 substr. MG1655]
PKA_2.08243.08243.3.dta	3.8355	3	K.TTHILEVAPEAQVVAVDIDEQRLS*R.V	gi|16131168|ref|NP_417747.1| 16S rRNA m5C967 methyltransferase, S-adenosyl-L-methionine-dependent [Escherichia coli str. K-12 substr. MG1655]
PKA_2.08392.08392.3.dta	4.0008	3	R.S*VESYKFNGWELDINSR.S	gi|16132218|ref|NP_418818.1| DNA-binding response regulator in two-component regulatory system with ArcB or CpxA [Escherichia coli str. K-12 substr. MG1655]
PKA_2.08687.08687.3.dta	3.0931	3	R.GRQDWS*AILEQVR.V	gi|16131722|ref|NP_418318.1| predicted oxidoreductase with NAD(P)-binding Rossmann-fold domain [Escherichia coli str. K-12 substr. MG1655]
PKA_2.08864.08864.3.dta	3.3392	3	K.HLLS*MKDNDQTANLGALIDAGVR.S	gi|90111273|ref|NP_415952.2| predicted peptidase [Escherichia coli str. K-12 substr. MG1655]
PKA_2.08885.08885.3.dta	3.7258	3	K.VHIINLEKT*VPM#FNEALAELNK.I	gi|16128162|ref|NP_414711.1| 30S ribosomal subunit protein S2 [Escherichia coli str. K-12 substr. MG1655]
PKA_2.09079.09079.3.dta	3.8986	3	K.GRAS*YTM#EFLKYDEAPSNVAQAVIEAR.G	gi|16131219|ref|NP_417799.1| protein chain elongation factor EF-G, GTP-binding [Escherichia coli str. K-12 substr. MG1655]
PKA_2.09119.09119.3.dta	4.1933	3	K.KHGGFYLGS*IGGPAAVLAQGS*IK.S	gi|16129570|ref|NP_416129.1| fumarate hydratase (fumarase A), aerobic Class I [Escherichia coli str. K-12 substr. MG1655]
PKA_2.09217.09217.3.dta	3.4144	3	-.MKT*IEVDDELYSYIASHTK.H	gi|16128663|ref|NP_415213.1| regulatory protein for replication initiation [Escherichia coli str. K-12 substr. MG1655]
PKA_2.09229.09229.4.dta	3.1225	4	R.IKLVGVIPEDQSVLRAS*NQGEPVILDINADAGK.A	gi|16129138|ref|NP_415693.1| membrane ATPase of the MinC-MinD-MinE system [Escherichia coli str. K-12 substr. MG1655]
PKA_2.09590.09590.3.dta	3.9527	3	R.YAKLS*EKELPLTESLALTIDR.V	gi|16128723|ref|NP_415276.1| phosphoglyceromutase 1 [Escherichia coli str. K-12 substr. MG1655]
PKA_2.09711.09711.3.dta	3.4874	3	K.RIET*LFTNDLDHGPYISETLR.V	gi|16131817|ref|NP_418414.1| RNA polymerase, beta subunit [Escherichia coli str. K-12 substr. MG1655]
PKA_2.09718.09718.3.dta	3.5926	3	K.SSLNVLAPGGRLS*IISFHSLEDR.I	gi|16128075|ref|NP_414624.1| S-adenosyl-dependent methyltransferase activity on membrane-located substrates [Escherichia coli str. K-12 substr. MG1655]
PKA_2.09880.09880.3.dta	3.2417	3	R.YPVTAVGS*VAEDNLRELGHVTLR.F	gi|16130611|ref|NP_417184.1| glucitol/sorbitol-specific enzyme IIA component of PTS [Escherichia coli str. K-12 substr. MG1655]
PKA_2.09906.09906.3.dta	4.1013	3	R.KCS*MIEHIMQSM#QFPAELIEK.V	gi|16128663|ref|NP_415213.1| regulatory protein for replication initiation [Escherichia coli str. K-12 substr. MG1655]
PKA_2.09907.09907.3.dta	3.4457	3	R.DRES*GGTGLGLAIVETAIQQHR.G	gi|16131751|ref|NP_418347.1| sensory histidine kinase in two-component regulatory system with CpxR [Escherichia coli str. K-12 substr. MG1655]
PKA_2.09927.09927.3.dta	4.388	3	R.RS*T*IFPNMIGLTIAVHNGR.Q	gi|16131195|ref|NP_417775.1| 30S ribosomal subunit protein S19 [Escherichia coli str. K-12 substr. MG1655]
PKA_2.10238.10238.4.dta	3.3255	4	K.VHIINLEKT*VPMFNEALAELNK.I	gi|16128162|ref|NP_414711.1| 30S ribosomal subunit protein S2 [Escherichia coli str. K-12 substr. MG1655]
PKA_2.10259.10259.4.dta	3.1128	4	K.VDRS*FGDIPLVHGM#PFISGIGIEALQNK.I	gi|16130031|ref|NP_416596.1| galactitol-specific enzyme IIB component of PTS [Escherichia coli str. K-12 substr. MG1655]
PKA_2.10339.10339.3.dta	4.4571	3	R.SGKS*ELEAFEVALENVRPT*VEVK.S	gi|16131220|ref|NP_417800.1| 30S ribosomal subunit protein S7 [Escherichia coli str. K-12 substr. MG1655]
PKA_2.10343.10343.3.dta	3.2392	3	R.SGKS*ELEAFEVALENVRPTVEVK.S	gi|16131220|ref|NP_417800.1| 30S ribosomal subunit protein S7 [Escherichia coli str. K-12 substr. MG1655]
PKA_2.10455.10455.3.dta	4.2018	3	K.LGS*QFHIPHGLANALLICNVIR.Y	gi|16129202|ref|NP_415757.1| fused acetaldehyde-CoA dehydrogenase/iron-dependent alcohol dehydrogenase/pyruvate-formate lyase deactivase [Escherichia coli str. K-12 substr. MG1655]
PKA_3.00469.00469.2.dta	2.3505	2	K.RGES*SGPDVSR.E	gi|16131769|ref|NP_418366.1| molecular chaperone and ATPase component of HslUV protease [Escherichia coli str. K-12 substr. MG1655]
PKA_3.00818.00818.2.dta	2.9152	2	R.KIS*NGEGVER.V	gi|16130527|ref|NP_417097.1| 50S ribosomal subunit protein L19 [Escherichia coli str. K-12 substr. MG1655]
PKA_3.00866.00866.2.dta	3.0371	2	R.KWT*DQSGQDR.Y	gi|16131885|ref|NP_418483.1| single-stranded DNA-binding protein [Escherichia coli str. K-12 substr. MG1655]
PKA_3.00962.00962.2.dta	2.395	2	K.RSS*S*KLSYK.L	gi|16128916|ref|NP_415469.1| fused predicted transporter subunits of ABC superfamily: ATP-binding components [Escherichia coli str. K-12 substr. MG1655]
PKA_3.01003.01003.2.dta	2.4004	2	R.GKS*VDIDR.A	gi|16129261|ref|NP_415816.1| gamma-Glu-gamma-aminobutyraldehyde dehydrogenase, NAD(P)H-dependent [Escherichia coli str. K-12 substr. MG1655]
PKA_3.01187.01187.2.dta	2.8985	2	R.IKS*NITPTR.K	gi|16130251|ref|NP_416819.1| acetyl-CoA carboxylase, beta (carboxyltranferase) subunit [Escherichia coli str. K-12 substr. MG1655]
PKA_3.01399.01399.2.dta	2.4351	2	K.M#AVKGS*QVIK.A	gi|16131060|ref|NP_417637.1| fused protein chain initiation factor 2, IF2: membrane protein/conserved protein [Escherichia coli str. K-12 substr. MG1655]
PKA_3.01455.01455.2.dta	2.5114	2	R.TKFT*NVGR.M	gi|16131000|ref|NP_417576.1| predicted DNA-binding transcriptional regulator [Escherichia coli str. K-12 substr. MG1655]
PKA_3.01613.01613.2.dta	2.6932	2	K.LVSTHNEASLS*R.S	gi|16128980|ref|NP_415534.1| fused DNA-binding transcriptional regulator/proline dehydrogenase/pyrroline-5-carboxylate dehydrogenase [Escherichia coli str. K-12 substr. MG1655]
PKA_3.01738.01738.2.dta	2.3571	2	R.KYS*SEQFR.M	gi|16128053|ref|NP_414601.1| RNA polymerase-associated helicase protein (ATPase and RNA polymerase recycling factor) [Escherichia coli str. K-12 substr. MG1655]
PKA_3.01844.01844.2.dta	2.3811	2	R.RGYT*AASIR.E	gi|16128656|ref|NP_415206.1| glutamyl-tRNA synthetase [Escherichia coli str. K-12 substr. MG1655]
PKA_3.01899.01899.2.dta	2.6915	2	K.RQT*VYLR.E	gi|16128857|ref|NP_415410.1| DNA-binding membrane protein required for chromosome resolution and partitioning [Escherichia coli str. K-12 substr. MG1655]
PKA_3.02004.02004.2.dta	3.1757	2	K.GKS*LDEAQAIK.N	gi|16130454|ref|NP_417024.1| scaffold protein [Escherichia coli str. K-12 substr. MG1655]
PKA_3.02053.02053.2.dta	2.777	2	R.VKT*LLNEK.A	gi|16131191|ref|NP_417771.1| 50S ribosomal subunit protein L29 [Escherichia coli str. K-12 substr. MG1655]
PKA_3.02058.02058.2.dta	3.8036	2	R.RSS*EVYGQTNIGGK.G	gi|16131764|ref|NP_418361.1| glycerol kinase [Escherichia coli str. K-12 substr. MG1655]
PKA_3.02099.02099.3.dta	4.8665	3	R.YAGRPASASPAVGYM#S*VHQK.Q	gi|16128701|ref|NP_415254.1| 2-oxoglutarate decarboxylase, thiamin-requiring [Escherichia coli str. K-12 substr. MG1655]
PKA_3.02130.02130.2.dta	2.8959	2	K.SKS*VQIEVR.K	gi|16131060|ref|NP_417637.1| fused protein chain initiation factor 2, IF2: membrane protein/conserved protein [Escherichia coli str. K-12 substr. MG1655]
PKA_3.02148.02148.2.dta	2.3479	2	K.LIAVNRVS*K.T	gi|16131182|ref|NP_417762.1| 30S ribosomal subunit protein S5 [Escherichia coli str. K-12 substr. MG1655]
PKA_3.02157.02157.2.dta	2.697	2	R.RGS*AFTQEVK.R	gi|90111244|ref|NP_415813.4| gamma-Glu-putrescine synthase [Escherichia coli str. K-12 substr. MG1655]
PKA_3.02304.02304.3.dta	3.5784	3	K.KQS*VDAM#LM#TGDSYDCGKK.M	gi|16129982|ref|NP_416546.1| predicted subunit with GalU [Escherichia coli str. K-12 substr. MG1655]
PKA_3.02339.02339.3.dta	3.1739	3	K.VAKS*NVPALEACPQKR.G	gi|16131221|ref|NP_417801.1| 30S ribosomal subunit protein S12 [Escherichia coli str. K-12 substr. MG1655]
PKA_3.02356.02356.3.dta	3.3128	3	R.KVAKS*NVPALEACPQK.R	gi|16131221|ref|NP_417801.1| 30S ribosomal subunit protein S12 [Escherichia coli str. K-12 substr. MG1655]
PKA_3.02421.02421.2.dta	2.4969	2	K.RNT*EIFR.G	gi|16128071|ref|NP_414620.1| acetolactate synthase III, thiamin-dependent, small subunit [Escherichia coli str. K-12 substr. MG1655]
PKA_3.02537.02537.3.dta	3.4731	3	R.RLS*QEQLQHAQQVAAR.D	gi|16131709|ref|NP_418305.1| sensory histidine kinase in two-component regulatory system with GlnG [Escherichia coli str. K-12 substr. MG1655]
PKA_3.02549.02549.2.dta	2.3745	2	K.NRPT*FAYGR.L	gi|16130897|ref|NP_417471.1| hydrogenase 2, small subunit [Escherichia coli str. K-12 substr. MG1655]
PKA_3.02605.02605.2.dta	2.5599	2	K.RVS*QASDSYYYR.A	gi|16130201|ref|NP_416769.1| conserved protein [Escherichia coli str. K-12 substr. MG1655]
PKA_3.02824.02824.3.dta	3.0683	3	K.RAT*IGDQVKPGDVVK.V	gi|16131848|ref|NP_418446.1| 23S rRNA pseudouridine synthase [Escherichia coli str. K-12 substr. MG1655]
PKA_3.02862.02862.2.dta	3.5414	2	K.YKFT*DVNGETK.T	gi|16130583|ref|NP_417155.1| DNA binding protein, nucleoid-associated [Escherichia coli str. K-12 substr. MG1655]
PKA_3.02864.02864.3.dta	3.6503	3	K.APAKES*APAAAAPAAQPALAAR.S	gi|16128702|ref|NP_415255.1| dihydrolipoyltranssuccinase [Escherichia coli str. K-12 substr. MG1655]
PKA_3.03015.03015.3.dta	3.7381	3	R.KEVETKS*AGGIVLTGSAAAK.S	gi|16131967|ref|NP_418566.1| Cpn10 chaperonin GroES, small subunit of GroESL [Escherichia coli str. K-12 substr. MG1655]
PKA_3.03111.03111.2.dta	2.4268	2	K.GIKDVS*FDR.S	gi|16131183|ref|NP_417763.1| 50S ribosomal subunit protein L18 [Escherichia coli str. K-12 substr. MG1655]
PKA_3.03124.03124.3.dta	3.9708	3	R.YAGRPASASPAVGYMS*VHQK.Q	gi|16128701|ref|NP_415254.1| 2-oxoglutarate decarboxylase, thiamin-requiring [Escherichia coli str. K-12 substr. MG1655]
PKA_3.03303.03303.2.dta	2.4064	2	R.KLS*EQGLITR.H	gi|90111660|ref|NP_418320.2| predicted DNA-binding transcriptional regulator [Escherichia coli str. K-12 substr. MG1655]
PKA_3.03390.03390.3.dta	3.3481	3	R.HGDAALDAASDS*VRPLTTNGCDESR.L	gi|16130273|ref|NP_416842.1| phosphohistidine phosphatase [Escherichia coli str. K-12 substr. MG1655]
PKA_3.03511.03511.2.dta	3.029	2	R.RLGNS*VDWER.E	gi|16132080|ref|NP_418679.1| valyl-tRNA synthetase [Escherichia coli str. K-12 substr. MG1655]
PKA_3.03704.03704.2.dta	3.2019	2	R.KGS*QVYIEGQLR.T	gi|16131885|ref|NP_418483.1| single-stranded DNA-binding protein [Escherichia coli str. K-12 substr. MG1655]
PKA_3.03845.03845.2.dta	3.5791	2	K.VKS*LIADEDNPNLK.L	gi|16128149|ref|NP_414698.1| conserved protein [Escherichia coli str. K-12 substr. MG1655]
PKA_3.03897.03897.2.dta	2.476	2	R.GKS*VEEILGK.-	gi|16131182|ref|NP_417762.1| 30S ribosomal subunit protein S5 [Escherichia coli str. K-12 substr. MG1655]
PKA_3.03973.03973.2.dta	3.5233	2	R.VKS*QAIEGLVK.A	gi|16128421|ref|NP_414970.1| peptidyl-prolyl cis/trans isomerase (trigger factor) [Escherichia coli str. K-12 substr. MG1655]
PKA_3.04013.04013.3.dta	4.2276	3	K.MRDS*AKDAVIPGLQK.D	gi|16131699|ref|NP_418295.1| conserved protein [Escherichia coli str. K-12 substr. MG1655]
PKA_3.04229.04229.3.dta	3.2234	3	R.VFQTHSPVVDS*ISVKR.R	gi|16130527|ref|NP_417097.1| 50S ribosomal subunit protein L19 [Escherichia coli str. K-12 substr. MG1655]
PKA_3.04355.04355.2.dta	2.4731	2	R.FVTLRVS*AK.G	gi|16131508|ref|NP_418094.1| 50S ribosomal subunit protein L28 [Escherichia coli str. K-12 substr. MG1655]
PKA_3.04432.04432.3.dta	3.7984	3	R.VFQTHSPVVDSIS*VKR.R	gi|16130527|ref|NP_417097.1| 50S ribosomal subunit protein L19 [Escherichia coli str. K-12 substr. MG1655]
PKA_3.04437.04437.2.dta	2.3571	2	R.RIS*ALGPGGLTR.E	gi|16131817|ref|NP_418414.1| RNA polymerase, beta subunit [Escherichia coli str. K-12 substr. MG1655]
PKA_3.04620.04620.3.dta	3.0568	3	R.RDDT*WVDEDEYEDDEEYEDENHGK.Q	gi|16128857|ref|NP_415410.1| DNA-binding membrane protein required for chromosome resolution and partitioning [Escherichia coli str. K-12 substr. MG1655]
PKA_3.04714.04714.3.dta	3.2603	3	K.KQS*VDAMLMTGDSYDCGKK.M	gi|16129982|ref|NP_416546.1| predicted subunit with GalU [Escherichia coli str. K-12 substr. MG1655]
PKA_3.04741.04741.3.dta	3.0293	3	R.GKS*RPIVEPDNVPMDMSPK.A	gi|16128747|ref|NP_415300.1| excinulease of nucleotide excision repair, DNA damage recognition component [Escherichia coli str. K-12 substr. MG1655]
PKA_3.04745.04745.3.dta	3.8306	3	K.VRS*VVSCDTDFGVCAHCYGR.D	gi|16131818|ref|NP_418415.1| RNA polymerase, beta prime subunit [Escherichia coli str. K-12 substr. MG1655]
PKA_3.04926.04926.3.dta	4.2788	3	R.YHS*IIIM#TDADVDGSHIR.T	gi|49176395|ref|YP_026241.1| DNA gyrase, subunit B [Escherichia coli str. K-12 substr. MG1655]
PKA_3.04960.04960.3.dta	3.5458	3	-.MIRIS*DAAQAHFAK.L	gi|16131290|ref|NP_417873.1| predicted gluconate transport associated protein [Escherichia coli str. K-12 substr. MG1655]
PKA_3.05049.05049.3.dta	4.5515	3	K.SRAPVAAPSQS*VATGAVNEIHTSPYSK.D	gi|16130671|ref|NP_417244.1| sulfite reductase, alpha subunit, flavoprotein [Escherichia coli str. K-12 substr. MG1655]
PKA_3.05307.05307.3.dta	3.6434	3	R.IHS*RLPIVIPAR.I	gi|16131971|ref|NP_418570.1| predicted lysine aminomutase [Escherichia coli str. K-12 substr. MG1655]
PKA_3.05312.05312.3.dta	4.5449	3	R.ALRS*GHQNLLSEAQPELER.T	gi|16131708|ref|NP_418304.1| fused DNA-binding response regulator in two-component regulatory system with GlnL: response regulator/sigma54 interaction protein [Escherichia coli str. K-12 substr. MG1655]
PKA_3.05319.05319.3.dta	3.1993	3	K.RET*RMYPEEPVYLPPR.Y	gi|16130216|ref|NP_416784.1| NADH:ubiquinone oxidoreductase, chain I [Escherichia coli str. K-12 substr. MG1655]
PKA_3.05348.05348.3.dta	3.5904	3	R.VKHPS*EIVNVGDEITVK.V	gi|16128878|ref|NP_415431.1| 30S ribosomal subunit protein S1 [Escherichia coli str. K-12 substr. MG1655]
PKA_3.05396.05396.3.dta	4.1919	3	R.AGGS*LKHADEQQAVSDFIR.L	gi|16131617|ref|NP_418205.1| fused D-ribose transporter subunits of ABC superfamily: ATP-binding components [Escherichia coli str. K-12 substr. MG1655]
PKA_3.05613.05613.3.dta	3.5268	3	R.VKHPS*EIVNVGDEITVK.V	gi|16128878|ref|NP_415431.1| 30S ribosomal subunit protein S1 [Escherichia coli str. K-12 substr. MG1655]
PKA_3.05708.05708.3.dta	3.18	3	K.ERFT*VLISPHVNK.D	gi|16131200|ref|NP_417780.1| 30S ribosomal subunit protein S10 [Escherichia coli str. K-12 substr. MG1655]
PKA_3.05734.05734.3.dta	3.1686	3	R.KLS*LEPLIAHR.G	gi|16130029|ref|NP_416594.1| galactitol-1-phosphate dehydrogenase, Zn-dependent and NAD(P)-binding [Escherichia coli str. K-12 substr. MG1655]
PKA_3.06002.06002.2.dta	2.3906	2	R.HGS*GIVCLCITEDR.R	gi|16130937|ref|NP_417513.1| 3,4-dihydroxy-2-butanone-4-phosphate synthase [Escherichia coli str. K-12 substr. MG1655]
PKA_3.06056.06056.3.dta	3.3361	3	K.HSQVFSTAEDNQS*AVTIHVLQGER.K	gi|16128008|ref|NP_414555.1| chaperone Hsp70, co-chaperone with DnaJ [Escherichia coli str. K-12 substr. MG1655]
PKA_3.06070.06070.3.dta	3.6916	3	R.KLS*LEPLIAHR.G	gi|16130029|ref|NP_416594.1| galactitol-1-phosphate dehydrogenase, Zn-dependent and NAD(P)-binding [Escherichia coli str. K-12 substr. MG1655]
PKA_3.06079.06079.2.dta	2.3489	2	R.HGLQS*ILR.E	gi|16131052|ref|NP_417629.1| predicted enzyme [Escherichia coli str. K-12 substr. MG1655]
PKA_3.06127.06127.3.dta	3.1818	3	R.TNKVS*LIVCSALKK.H	gi|90111591|ref|NP_417894.2| gluconate kinase 2 [Escherichia coli str. K-12 substr. MG1655]
PKA_3.06189.06189.3.dta	3.2454	3	R.VVSDKMEKS*IVVAIER.F	gi|16131190|ref|NP_417770.1| 30S ribosomal subunit protein S17 [Escherichia coli str. K-12 substr. MG1655]
PKA_3.06210.06210.3.dta	3.0082	3	R.LKNTLIDAKES*VPAIAAVR.G	gi|16129263|ref|NP_415818.1| GABA aminotransferase, PLP-dependent [Escherichia coli str. K-12 substr. MG1655]
PKA_3.06233.06233.3.dta	3.2643	3	R.YHS*IIIMTDADVDGSHIR.T	gi|49176395|ref|YP_026241.1| DNA gyrase, subunit B [Escherichia coli str. K-12 substr. MG1655]
PKA_3.06387.06387.3.dta	3.4143	3	R.RLS*NQNVTVAVLSTYQHR.S	gi|16130143|ref|NP_416710.1| nitrate reductase, periplasmic, large subunit [Escherichia coli str. K-12 substr. MG1655]
PKA_3.06388.06388.3.dta	3.1221	3	R.LCS*HDDTQKIYAYLSR.-	gi|49176138|ref|NP_416237.3| 6-phosphofructokinase II [Escherichia coli str. K-12 substr. MG1655]
PKA_3.06391.06391.3.dta	4.6295	3	R.IARET*LEIYSPLAHR.L	gi|16131521|ref|NP_418107.1| bifunctional (p)ppGpp synthetase II/ guanosine-3',5'-bis pyrophosphate 3'-pyrophosphohydrolase [Escherichia coli str. K-12 substr. MG1655]
PKA_3.06590.06590.3.dta	3.0013	3	K.VKDS*LKDSFDDSSANLFK.L	gi|16131470|ref|NP_418056.1| fused mannitol-specific PTS enzymes: IIA components/IIB components/IIC components [Escherichia coli str. K-12 substr. MG1655]
PKA_3.06772.06772.2.dta	2.3795	2	K.LS*RLSSM#NPVERR.V	gi|16128074|ref|NP_414623.1| conserved protein [Escherichia coli str. K-12 substr. MG1655]
PKA_3.06812.06812.3.dta	3.3006	3	R.RQT*VEAVKPLSFTLR.E	gi|16129251|ref|NP_415806.1| predicted antimicrobial peptide transporter subunit [Escherichia coli str. K-12 substr. MG1655]
PKA_3.06931.06931.3.dta	3.0107	3	R.LHFGS*YHDVDSSELAFK.L	gi|16131219|ref|NP_417799.1| protein chain elongation factor EF-G, GTP-binding [Escherichia coli str. K-12 substr. MG1655]
PKA_3.06965.06965.3.dta	3.7194	3	K.KVS*QALDILTYTNKK.A	gi|16131194|ref|NP_417774.1| 50S ribosomal subunit protein L22 [Escherichia coli str. K-12 substr. MG1655]
PKA_3.07061.07061.3.dta	3.6722	3	-.MNKS*QLIDKIAAGADISK.A	gi|16128425|ref|NP_414974.1| HU, DNA-binding transcriptional regulator, beta subunit [Escherichia coli str. K-12 substr. MG1655]
PKA_3.07127.07127.3.dta	3.8965	3	K.KVT*QLVNVEEHVEGFR.Q	gi|16128785|ref|NP_415338.1| DNA-binding transcriptional regulator of mntH [Escherichia coli str. K-12 substr. MG1655]
PKA_3.07367.07367.2.dta	2.6563	2	R.LKVS*VSIFGR.A	gi|16131812|ref|NP_418409.1| transcription termination factor [Escherichia coli str. K-12 substr. MG1655]
PKA_3.07465.07465.3.dta	3.2597	3	R.RST*IFPNM#IGLTIAVHNGR.Q	gi|16131195|ref|NP_417775.1| 30S ribosomal subunit protein S19 [Escherichia coli str. K-12 substr. MG1655]
PKA_3.07477.07477.2.dta	2.4537	2	K.RSS*MFPDPWR.T	gi|16129012|ref|NP_415567.1| glucan biosynthesis: glycosyl transferase [Escherichia coli str. K-12 substr. MG1655]
PKA_3.07586.07586.3.dta	4.0657	3	K.IRKT*LEDAIPLVVGK.T	gi|16130694|ref|NP_417267.1| (D)-glucarate dehydratase 1 [Escherichia coli str. K-12 substr. MG1655]
PKA_3.07736.07736.3.dta	3.3922	3	R.HQS*FALAAEELSLSPSAVSHR.I	gi|16130296|ref|NP_416865.1| DNA-binding transcriptional dual regulator [Escherichia coli str. K-12 substr. MG1655]
PKA_3.07767.07767.3.dta	3.2256	3	R.GGVS*LRPGDGVIHSWLNR.M	gi|16128111|ref|NP_414660.1| bifunctional aconitate hydratase 2/2-methylisocitrate dehydratase [Escherichia coli str. K-12 substr. MG1655]
PKA_3.07778.07778.3.dta	3.4304	3	K.RGS*AIDLPVYSYVEHTR.M	gi|90111379|ref|NP_416570.2| uridine/cytidine kinase [Escherichia coli str. K-12 substr. MG1655]
PKA_3.07820.07820.3.dta	4.2544	3	R.RGDYLGAT*VQVIPHITNAIK.E	gi|16130687|ref|NP_417260.1| CTP synthetase [Escherichia coli str. K-12 substr. MG1655]
PKA_3.07894.07894.3.dta	3.092	3	R.GGVS*LRPGDGVIHSWLNR.M	gi|16128111|ref|NP_414660.1| bifunctional aconitate hydratase 2/2-methylisocitrate dehydratase [Escherichia coli str. K-12 substr. MG1655]
PKA_3.07905.07905.3.dta	3.3173	3	K.RGS*AIDLPVYSYVEHTR.M	gi|90111379|ref|NP_416570.2| uridine/cytidine kinase [Escherichia coli str. K-12 substr. MG1655]
PKA_3.08067.08067.3.dta	3.1363	3	K.TYDGIHRIS*FLIDADGK.I	gi|16130405|ref|NP_416975.1| thiol peroxidase, thioredoxin-dependent [Escherichia coli str. K-12 substr. MG1655]
PKA_3.08115.08115.4.dta	3.1052	4	K.FCRFT*AEGVQEIDYKDIATLK.N	gi|16132024|ref|NP_418623.1| 30S ribosomal subunit protein S18 [Escherichia coli str. K-12 substr. MG1655]
PKA_3.08131.08131.3.dta	3.0552	3	R.RFS*HLNPDQYNGACLLGLR.G	gi|90111212|ref|NP_415608.2| fatty acid/phospholipid synthesis protein [Escherichia coli str. K-12 substr. MG1655]
PKA_3.08207.08207.3.dta	3.1347	3	R.HIYAQVIAPNGS*EVLVAASTVEK.A	gi|16131183|ref|NP_417763.1| 50S ribosomal subunit protein L18 [Escherichia coli str. K-12 substr. MG1655]
PKA_3.08219.08219.2.dta	3.2786	2	R.KIS*WMEIYTGEK.S	gi|16129099|ref|NP_415654.1| e14 prophage; isocitrate dehydrogenase, specific for NADP+ [Escherichia coli str. K-12 substr. MG1655]
PKA_3.08238.08238.3.dta	5.1144	3	K.FCRFT*AEGVQEIDYKDIATLK.N	gi|16132024|ref|NP_418623.1| 30S ribosomal subunit protein S18 [Escherichia coli str. K-12 substr. MG1655]
PKA_3.08279.08279.3.dta	3.6049	3	R.RGS*LPIALDEVITDGHK.R	gi|16129202|ref|NP_415757.1| fused acetaldehyde-CoA dehydrogenase/iron-dependent alcohol dehydrogenase/pyruvate-formate lyase deactivase [Escherichia coli str. K-12 substr. MG1655]
PKA_3.08394.08394.3.dta	3.9681	3	R.KT*HNQGVFDVYTPDILR.C	gi|16128870|ref|NP_415423.1| pyruvate formate lyase I [Escherichia coli str. K-12 substr. MG1655]
PKA_3.08426.08426.3.dta	3.1095	3	K.NVLSS*GKVIVEGINLVKK.H	gi|16131188|ref|NP_417768.1| 50S ribosomal subunit protein L24 [Escherichia coli str. K-12 substr. MG1655]
PKA_3.08650.08650.3.dta	3.4985	3	R.S*VESYKFNGWELDINSR.S	gi|16132218|ref|NP_418818.1| DNA-binding response regulator in two-component regulatory system with ArcB or CpxA [Escherichia coli str. K-12 substr. MG1655]
PKA_3.09243.09243.4.dta	3.6044	4	R.IDEVVVFHPLGEQHIAS*IAQIQLKR.L	gi|16130513|ref|NP_417083.1| protein disaggregation chaperone [Escherichia coli str. K-12 substr. MG1655]
PKA_3.09296.09296.3.dta	3.2411	3	R.VHFISALHGS*GVGNLFESVR.E	gi|90111450|ref|NP_417006.2| predicted GTP-binding protein [Escherichia coli str. K-12 substr. MG1655]
PKA_3.09590.09590.4.dta	3.0283	4	K.AMWPMTAVGVLLLGIIEVS*FCIMAVNLGGIR.N	##gi|90111596|ref|NP_417930.2| predicted transporter [Escherichia coli str. K-12 substr. MG1655]
PKA_3.09809.09809.3.dta	3.475	3	R.RST*IFPNMIGLTIAVHNGR.Q	gi|16131195|ref|NP_417775.1| 30S ribosomal subunit protein S19 [Escherichia coli str. K-12 substr. MG1655]
PKA_3.09901.09901.4.dta	3.1185	4	K.LENS*LGGIKDM#GGLPDALFVIDADHEHIAIK.E	gi|16128162|ref|NP_414711.1| 30S ribosomal subunit protein S2 [Escherichia coli str. K-12 substr. MG1655]
PKA_3.10067.10067.3.dta	3.4847	3	R.RS*T*IFPNMIGLTIAVHNGR.Q	gi|16131195|ref|NP_417775.1| 30S ribosomal subunit protein S19 [Escherichia coli str. K-12 substr. MG1655]
PKA_3.10212.10212.3.dta	5.0812	3	R.SGKSELEAFEVALENVRPT*VEVK.S	gi|16131220|ref|NP_417800.1| 30S ribosomal subunit protein S7 [Escherichia coli str. K-12 substr. MG1655]
PKA_3.10414.10414.3.dta	4.1447	3	R.RGDDFITLNAEQAMQGAADILRQS*K.K	gi|145698290|ref|NP_416786.4| NADH:ubiquinone oxidoreductase, chain G [Escherichia coli str. K-12 substr. MG1655]
PKA_3.10424.10424.3.dta	3.4524	3	R.IHRS*NLIGMGILPLEFPQGVTR.K	gi|16129237|ref|NP_415792.1| aconitate hydratase 1 [Escherichia coli str. K-12 substr. MG1655]
PKA_3.10492.10492.3.dta	4.5436	3	K.AKS*GHPGAPMGMADIAEVLWR.D	gi|49176286|ref|YP_026188.1| transketolase 1, thiamin-binding [Escherichia coli str. K-12 substr. MG1655]
PKA_4.01133.01133.2.dta	2.1428	2	R.IKS*NITPTR.K	gi|16130251|ref|NP_416819.1| acetyl-CoA carboxylase, beta (carboxyltranferase) subunit [Escherichia coli str. K-12 substr. MG1655]
PKA_4.01518.01518.3.dta	3.2279	3	R.KGS*GIHVVSNQPR.H	gi|90111537|ref|NP_417565.2| DNA-binding transcriptional repressor [Escherichia coli str. K-12 substr. MG1655]
PKA_4.01681.01681.3.dta	3.098	3	K.LKS*LVSDDKK.D	gi|16130343|ref|NP_416912.1| glucose-specific enzyme IIA component of PTS [Escherichia coli str. K-12 substr. MG1655]
PKA_4.02053.02053.3.dta	3.6924	3	K.IQS*RAELLKK.M	gi|16132218|ref|NP_418818.1| DNA-binding response regulator in two-component regulatory system with ArcB or CpxA [Escherichia coli str. K-12 substr. MG1655]
PKA_4.02154.02154.2.dta	2.4737	2	R.VKT*LLNEK.A	gi|16131191|ref|NP_417771.1| 50S ribosomal subunit protein L29 [Escherichia coli str. K-12 substr. MG1655]
PKA_4.02267.02267.2.dta	3.148	2	K.SKS*VQIEVR.K	gi|16131060|ref|NP_417637.1| fused protein chain initiation factor 2, IF2: membrane protein/conserved protein [Escherichia coli str. K-12 substr. MG1655]
PKA_4.02299.02299.3.dta	3.0238	3	-.MKT*FTAKPETVK.R	gi|16131121|ref|NP_417698.1| 50S ribosomal subunit protein L13 [Escherichia coli str. K-12 substr. MG1655]
PKA_4.02309.02309.2.dta	2.1044	2	R.RGS*AFTQEVK.R	gi|90111244|ref|NP_415813.4| gamma-Glu-putrescine synthase [Escherichia coli str. K-12 substr. MG1655]
PKA_4.02327.02327.3.dta	3.0366	3	K.KGAIVTGKVT*AVDAK.G	gi|16128878|ref|NP_415431.1| 30S ribosomal subunit protein S1 [Escherichia coli str. K-12 substr. MG1655]
PKA_4.02353.02353.3.dta	3.0518	3	R.IHT*IKINPDK.I	gi|145698316|ref|NP_417633.4| polynucleotide phosphorylase/polyadenylase [Escherichia coli str. K-12 substr. MG1655]
PKA_4.02359.02359.2.dta	2.17	2	R.KLS*YTGEVK.A	gi|16128002|ref|NP_414549.1| transaldolase B [Escherichia coli str. K-12 substr. MG1655]
PKA_4.02515.02515.3.dta	3.525	3	R.KVAKS*NVPALEACPQK.R	gi|16131221|ref|NP_417801.1| 30S ribosomal subunit protein S12 [Escherichia coli str. K-12 substr. MG1655]
PKA_4.02698.02698.2.dta	2.1556	2	K.AIVKTS*HLVK.I	gi|16131312|ref|NP_417897.1| predicted oxidoreductase with NAD(P)-binding Rossmann-fold domain [Escherichia coli str. K-12 substr. MG1655]
PKA_4.02882.02882.3.dta	3.3526	3	K.RKGS*S*LQQGFQKPAQAVNR.D	gi|16131060|ref|NP_417637.1| fused protein chain initiation factor 2, IF2: membrane protein/conserved protein [Escherichia coli str. K-12 substr. MG1655]
PKA_4.02997.02997.3.dta	4.0479	3	R.GQARKT*IASNAITINGEK.Q	gi|16129595|ref|NP_416154.1| tyrosyl-tRNA synthetase [Escherichia coli str. K-12 substr. MG1655]
PKA_4.03034.03034.3.dta	3.3079	3	K.RIS*LDEAM#ASGHVK.E	gi|16128664|ref|NP_415214.1| phosphoglucomutase [Escherichia coli str. K-12 substr. MG1655]
PKA_4.03086.03086.3.dta	3.8333	3	K.RAT*IGDQVKPGDVVK.V	gi|16131848|ref|NP_418446.1| 23S rRNA pseudouridine synthase [Escherichia coli str. K-12 substr. MG1655]
PKA_4.03348.03348.2.dta	2.1807	2	K.LRS*LIR.F	gi|16129674|ref|NP_416233.1| protein chain initiation factor IF-3 [Escherichia coli str. K-12 substr. MG1655]
PKA_4.03436.03436.2.dta	2.6059	2	R.TNIQDGS*MLHVTHK.S	gi|90111568|ref|NP_417738.4| conserved protein [Escherichia coli str. K-12 substr. MG1655]
PKA_4.03585.03585.2.dta	2.8745	2	R.SKFGGS*AWR.W	gi|16132061|ref|NP_418660.1| trehalose-6-P hydrolase [Escherichia coli str. K-12 substr. MG1655]
PKA_4.03612.03612.2.dta	2.801	2	R.NAQQIADRAS*KLYDK.M	gi|16131681|ref|NP_418276.1| predicted recombination limiting protein [Escherichia coli str. K-12 substr. MG1655]
PKA_4.03628.03628.3.dta	4.1849	3	K.KQS*VDAM#LMTGDSYDCGKK.M	gi|16129982|ref|NP_416546.1| predicted subunit with GalU [Escherichia coli str. K-12 substr. MG1655]
PKA_4.03833.03833.3.dta	3.159	3	R.HGDAALDAASDS*VRPLTTNGCDESR.L	gi|16130273|ref|NP_416842.1| phosphohistidine phosphatase [Escherichia coli str. K-12 substr. MG1655]
PKA_4.03882.03882.3.dta	3.7531	3	R.YAGRPAS*ASPAVGYMSVHQK.Q	gi|16128701|ref|NP_415254.1| 2-oxoglutarate decarboxylase, thiamin-requiring [Escherichia coli str. K-12 substr. MG1655]
PKA_4.03919.03919.3.dta	3.3173	3	K.YANRVS*YQVLNQHSPR.L	gi|16128461|ref|NP_415010.1| inosine/guanosine kinase [Escherichia coli str. K-12 substr. MG1655]
PKA_4.04088.04088.3.dta	3.2509	3	K.M#RDS*AKDAVIPGLQK.D	gi|16131699|ref|NP_418295.1| conserved protein [Escherichia coli str. K-12 substr. MG1655]
PKA_4.04186.04186.3.dta	3.3686	3	R.KAS*GGKIEVLVER.M	gi|16128390|ref|NP_414939.1| S-adenosylmethionine:tRNA ribosyltransferase-isomerase [Escherichia coli str. K-12 substr. MG1655]
PKA_4.04192.04192.3.dta	3.623	3	R.RLEARPT*ADLCIDCK.T	gi|16128138|ref|NP_414687.1| DNA-binding transcriptional regulator of rRNA transcription, DnaK suppressor protein [Escherichia coli str. K-12 substr. MG1655]
PKA_4.04269.04269.3.dta	3.1756	3	R.FDFS*HNEAM#KPEEIR.A	gi|16130604|ref|NP_417177.1| alanyl-tRNA synthetase [Escherichia coli str. K-12 substr. MG1655]
PKA_4.04288.04288.4.dta	3.3377	4	R.RENELEEAVM#S*DRDTGAAAEPR.A	gi|16131060|ref|NP_417637.1| fused protein chain initiation factor 2, IF2: membrane protein/conserved protein [Escherichia coli str. K-12 substr. MG1655]
PKA_4.04323.04323.3.dta	3.1305	3	R.S*GIRPLHQNCSFENYR.V	gi|16132182|ref|NP_418781.1| DNA biosynthesis protein [Escherichia coli str. K-12 substr. MG1655]
PKA_4.04366.04366.3.dta	3.535	3	K.M#RDS*AKDAVIPGLQK.D	gi|16131699|ref|NP_418295.1| conserved protein [Escherichia coli str. K-12 substr. MG1655]
PKA_4.04389.04389.3.dta	3.159	3	K.KQS*VDAMLM#TGDSYDCGKK.M	gi|16129982|ref|NP_416546.1| predicted subunit with GalU [Escherichia coli str. K-12 substr. MG1655]
PKA_4.04410.04410.2.dta	3.3142	2	R.VKS*QAIEGLVK.A	gi|16128421|ref|NP_414970.1| peptidyl-prolyl cis/trans isomerase (trigger factor) [Escherichia coli str. K-12 substr. MG1655]
PKA_4.04432.04432.2.dta	2.3581	2	K.LVKS*KATNLLYTR.N	gi|16128780|ref|NP_415333.1| Fe-binding and storage protein [Escherichia coli str. K-12 substr. MG1655]
PKA_4.04436.04436.3.dta	3.9518	3	R.IKS*IENLDNLHTR.V	gi|16129389|ref|NP_415947.1| predicted S-adenosyl-L-methionine-dependent methyltransferase [Escherichia coli str. K-12 substr. MG1655]
PKA_4.04518.04518.3.dta	4.0848	3	R.VGGS*TYQVPVEVRPVRR.N	gi|16131220|ref|NP_417800.1| 30S ribosomal subunit protein S7 [Escherichia coli str. K-12 substr. MG1655]
PKA_4.04531.04531.3.dta	3.9311	3	K.VISHRVETGS*GIGFGATVK.A	gi|16128423|ref|NP_414972.1| ATPase and specificity subunit of ClpX-ClpP ATP-dependent serine protease [Escherichia coli str. K-12 substr. MG1655]
PKA_4.04560.04560.3.dta	3.2242	3	K.GKAT*VILAHTIK.G	gi|16128107|ref|NP_414656.1| pyruvate dehydrogenase, decarboxylase component E1, thiamin-binding [Escherichia coli str. K-12 substr. MG1655]
PKA_4.04611.04611.3.dta	3.3656	3	K.RIS*LDEAMASGHVK.E	gi|16128664|ref|NP_415214.1| phosphoglucomutase [Escherichia coli str. K-12 substr. MG1655]
PKA_4.05013.05013.3.dta	4.5608	3	R.IKHT*AIDGGTFQNEITDR.N	gi|90111152|ref|NP_415139.2| alkyl hydroperoxide reductase, F52a subunit, FAD/NAD(P)-binding [Escherichia coli str. K-12 substr. MG1655]
PKA_4.05115.05115.3.dta	3.6342	3	K.VRS*VVSCDTDFGVCAHCYGR.D	gi|16131818|ref|NP_418415.1| RNA polymerase, beta prime subunit [Escherichia coli str. K-12 substr. MG1655]
PKA_4.05118.05118.2.dta	2.2632	2	R.S*LIT*GERMAKIEK.G	gi|16129188|ref|NP_415743.1| nitrate reductase 1, beta (Fe-S) subunit [Escherichia coli str. K-12 substr. MG1655]
PKA_4.05241.05241.3.dta	3.3815	3	K.IIREHEDT*LAGIEATGVTQR.N	gi|16129234|ref|NP_415789.1| predicted protein [Escherichia coli str. K-12 substr. MG1655]
PKA_4.05278.05278.3.dta	3.851	3	R.YHS*IIIM#TDADVDGSHIR.T	gi|49176395|ref|YP_026241.1| DNA gyrase, subunit B [Escherichia coli str. K-12 substr. MG1655]
PKA_4.05334.05334.2.dta	2.1304	2	R.RLSGHALKGS*EIIR.L	gi|90111128|ref|NP_414928.2| manno(fructo)kinase [Escherichia coli str. K-12 substr. MG1655]
PKA_4.05406.05406.3.dta	3.42	3	R.YHS*IIIM#TDADVDGSHIR.T	gi|49176395|ref|YP_026241.1| DNA gyrase, subunit B [Escherichia coli str. K-12 substr. MG1655]
PKA_4.05464.05464.3.dta	3.1307	3	R.KGDAAEGYHQS*LIDITPQR.V	gi|16131491|ref|NP_418077.1| ADP-heptose:LPS heptosyltransferase II [Escherichia coli str. K-12 substr. MG1655]
PKA_4.05475.05475.3.dta	3.3834	3	-.MIRIS*DAAQAHFAK.L	gi|16131290|ref|NP_417873.1| predicted gluconate transport associated protein [Escherichia coli str. K-12 substr. MG1655]
PKA_4.05716.05716.3.dta	3.6948	3	R.RNMINVALNNGT*LQHPVK.G	gi|16131182|ref|NP_417762.1| 30S ribosomal subunit protein S5 [Escherichia coli str. K-12 substr. MG1655]
PKA_4.05724.05724.3.dta	3.0598	3	R.IKDIEAKLS*NAQVIDVTK.M	gi|90111554|ref|NP_417648.4| transcription elongation factor [Escherichia coli str. K-12 substr. MG1655]
PKA_4.05752.05752.3.dta	4.0813	3	R.VKHPS*EIVNVGDEITVK.V	gi|16128878|ref|NP_415431.1| 30S ribosomal subunit protein S1 [Escherichia coli str. K-12 substr. MG1655]
PKA_4.05814.05814.3.dta	4.3862	3	R.RS*HDALTAVTSLSVDK.T	gi|16129052|ref|NP_415607.1| 50S ribosomal subunit protein L32 [Escherichia coli str. K-12 substr. MG1655]
PKA_4.05876.05876.3.dta	3.8564	3	R.VKHPS*EIVNVGDEITVK.V	gi|16128878|ref|NP_415431.1| 30S ribosomal subunit protein S1 [Escherichia coli str. K-12 substr. MG1655]
PKA_4.05950.05950.3.dta	4.8928	3	K.RQT*LGQHDFS*AGEGLYTHMK.A	gi|16131612|ref|NP_418200.1| asparagine synthetase A [Escherichia coli str. K-12 substr. MG1655]
PKA_4.05952.05952.3.dta	3.7582	3	K.ERFT*VLISPHVNK.D	gi|16131200|ref|NP_417780.1| 30S ribosomal subunit protein S10 [Escherichia coli str. K-12 substr. MG1655]
PKA_4.06008.06008.3.dta	3.9422	3	-.MKKGT*VLNSDISSVISR.L	gi|90111647|ref|NP_418204.2| predicted cytoplasmic sugar-binding protein [Escherichia coli str. K-12 substr. MG1655]
PKA_4.06009.06009.2.dta	2.4334	2	R.VKHPS*EIVNVGDEITVK.V	gi|16128878|ref|NP_415431.1| 30S ribosomal subunit protein S1 [Escherichia coli str. K-12 substr. MG1655]
PKA_4.06062.06062.2.dta	3.0927	2	R.GKITDAVEKFS*VIK.T	gi|90111450|ref|NP_417006.2| predicted GTP-binding protein [Escherichia coli str. K-12 substr. MG1655]
PKA_4.06081.06081.3.dta	3.2069	3	K.ERFT*VLISPHVNK.D	gi|16131200|ref|NP_417780.1| 30S ribosomal subunit protein S10 [Escherichia coli str. K-12 substr. MG1655]
PKA_4.06088.06088.4.dta	3.233	4	K.NTTIPTKHS*QVFSTAEDNQSAVTIHVLQGER.K	gi|16128008|ref|NP_414555.1| chaperone Hsp70, co-chaperone with DnaJ [Escherichia coli str. K-12 substr. MG1655]
PKA_4.06103.06103.3.dta	3.2746	3	R.HFM#AGKS*EADIAAEFTR.L	gi|90111414|ref|NP_416796.2| predicted hydrolase or phosphatase [Escherichia coli str. K-12 substr. MG1655]
PKA_4.06210.06210.3.dta	3.1207	3	K.ERFT*VLISPHVNK.D	gi|16131200|ref|NP_417780.1| 30S ribosomal subunit protein S10 [Escherichia coli str. K-12 substr. MG1655]
PKA_4.06252.06252.3.dta	3.1051	3	R.KLS*LEPLIAHR.G	gi|16130029|ref|NP_416594.1| galactitol-1-phosphate dehydrogenase, Zn-dependent and NAD(P)-binding [Escherichia coli str. K-12 substr. MG1655]
PKA_4.06302.06302.3.dta	3.0535	3	R.HAAELKS*VFCQPLGDR.Y	gi|16130950|ref|NP_417526.1| predicted adenylate cyclase [Escherichia coli str. K-12 substr. MG1655]
PKA_4.06341.06341.3.dta	3.1714	3	K.ERFT*VLISPHVNK.D	gi|16131200|ref|NP_417780.1| 30S ribosomal subunit protein S10 [Escherichia coli str. K-12 substr. MG1655]
PKA_4.06381.06381.3.dta	3.8546	3	R.KKT*VNVADIESVVAR.I	gi|16128850|ref|NP_415403.1| ATPase and specificity subunit of ClpA-ClpP ATP-dependent serine protease, chaperone activity [Escherichia coli str. K-12 substr. MG1655]
PKA_4.06406.06406.3.dta	3.8296	3	R.YHS*IIIMTDADVDGSHIR.T	gi|49176395|ref|YP_026241.1| DNA gyrase, subunit B [Escherichia coli str. K-12 substr. MG1655]
PKA_4.06421.06421.3.dta	3.6237	3	R.AIGHIKS*MLLQR.N	gi|16128699|ref|NP_415252.1| succinate dehydrogenase, FeS subunit [Escherichia coli str. K-12 substr. MG1655]
PKA_4.06428.06428.3.dta	4.015	3	-.MKHYS*IQPANLEFNAEGTPVSR.D	gi|90111418|ref|NP_416827.4| fused 5-methylaminomethyl-2-thiouridine-forming enzyme methyltransferase/FAD-dependent demodification enzyme [Escherichia coli str. K-12 substr. MG1655]
PKA_4.06495.06495.3.dta	4.1724	3	R.VKHPS*EIVNVGDEITVK.V	gi|16128878|ref|NP_415431.1| 30S ribosomal subunit protein S1 [Escherichia coli str. K-12 substr. MG1655]
PKA_4.06499.06499.3.dta	3.1704	3	K.RAADNKS*LGQFNLDGINPAPR.G	gi|16128008|ref|NP_414555.1| chaperone Hsp70, co-chaperone with DnaJ [Escherichia coli str. K-12 substr. MG1655]
PKA_4.06519.06519.3.dta	3.2299	3	K.RAS*QLLDISLTKR.G	gi|16130640|ref|NP_417213.1| methyl-directed mismatch repair protein [Escherichia coli str. K-12 substr. MG1655]
PKA_4.06521.06521.3.dta	3.0553	3	K.RVT*CSAREDAVEFFAK.L	gi|16131728|ref|NP_418324.1| predicted acetyltransferase [Escherichia coli str. K-12 substr. MG1655]
PKA_4.06664.06664.3.dta	3.0971	3	K.ADHGGISGKS*FIDPEVLR.R	gi|16130506|ref|NP_417076.1| predicted methyltransferase [Escherichia coli str. K-12 substr. MG1655]
PKA_4.06686.06686.3.dta	3.4775	3	R.HFMAGKS*EADIAAEFTR.L	gi|90111414|ref|NP_416796.2| predicted hydrolase or phosphatase [Escherichia coli str. K-12 substr. MG1655]
PKA_4.06702.06702.3.dta	3.4848	3	K.KAMDEQGKS*LDDFLIKQ.-	gi|16129198|ref|NP_415753.1| global DNA-binding transcriptional dual regulator H-NS [Escherichia coli str. K-12 substr. MG1655]
PKA_4.06808.06808.3.dta	3.42	3	R.HFMAGKS*EADIAAEFTR.L	gi|90111414|ref|NP_416796.2| predicted hydrolase or phosphatase [Escherichia coli str. K-12 substr. MG1655]
PKA_4.06836.06836.2.dta	3.4858	2	R.KIS*WM#EIYTGEK.S	gi|16129099|ref|NP_415654.1| e14 prophage; isocitrate dehydrogenase, specific for NADP+ [Escherichia coli str. K-12 substr. MG1655]
PKA_4.07084.07084.3.dta	3.0335	3	R.LT*IS*T*PNNLFALIPSAR.K	gi|16129757|ref|NP_416317.1| predicted oxidoreductase [Escherichia coli str. K-12 substr. MG1655]
PKA_4.07090.07090.3.dta	4.2386	3	K.KVS*QALDILTYTNKK.A	gi|16131194|ref|NP_417774.1| 50S ribosomal subunit protein L22 [Escherichia coli str. K-12 substr. MG1655]
PKA_4.07094.07094.3.dta	3.6881	3	K.LREELDFLKS*VR.R	gi|90111554|ref|NP_417648.4| transcription elongation factor [Escherichia coli str. K-12 substr. MG1655]
PKA_4.07100.07100.4.dta	3.5967	4	R.LLS*QRHELQGQIAAHNQQIIQYQQQIEQR.Q	gi|16128382|ref|NP_414931.1| exonuclease, dsDNA, ATP-dependent [Escherichia coli str. K-12 substr. MG1655]
PKA_4.07130.07130.2.dta	2.8213	2	R.GFGS*FSLHYR.A	gi|16128879|ref|NP_415432.1| integration host factor (IHF), DNA-binding protein, beta subunit [Escherichia coli str. K-12 substr. MG1655]
PKA_4.07145.07145.4.dta	3.2025	4	R.TNIQDGSMLHVTHKS*S*YNPDGNPLTIGEDVTVGHK.V	gi|90111568|ref|NP_417738.4| conserved protein [Escherichia coli str. K-12 substr. MG1655]
PKA_4.07278.07278.3.dta	4.6264	3	K.KVT*QLVNVEEHVEGFR.Q	gi|16128785|ref|NP_415338.1| DNA-binding transcriptional regulator of mntH [Escherichia coli str. K-12 substr. MG1655]
PKA_4.07291.07291.3.dta	3.1629	3	R.GHIINKGEAIGVIAAQS*IGEPGTQLTMR.T	gi|16131818|ref|NP_418415.1| RNA polymerase, beta prime subunit [Escherichia coli str. K-12 substr. MG1655]
PKA_4.07403.07403.4.dta	3.8146	4	R.VPLHT*LRADIDYNTSEAHTTYGVIGVK.V	gi|16131193|ref|NP_417773.1| 30S ribosomal subunit protein S3 [Escherichia coli str. K-12 substr. MG1655]
PKA_4.07551.07551.3.dta	4.9056	3	R.AHYVDIIFGPQT*LHR.L	gi|16128644|ref|NP_415194.1| isopentenyl-adenosine A37 tRNA methylthiolase [Escherichia coli str. K-12 substr. MG1655]
PKA_4.07572.07572.4.dta	3.2167	4	K.LENRT*HAPVDFDTAVASTITSHDAGYINK.Q	gi|16128870|ref|NP_415423.1| pyruvate formate lyase I [Escherichia coli str. K-12 substr. MG1655]
PKA_4.07650.07650.3.dta	3.6249	3	K.IRKT*LEDAIPLVVGK.T	gi|16130694|ref|NP_417267.1| (D)-glucarate dehydratase 1 [Escherichia coli str. K-12 substr. MG1655]
PKA_4.07661.07661.3.dta	4.0308	3	R.IHRLT*DILAAGLQQK.G	gi|16130805|ref|NP_417379.1| glycine decarboxylase, PLP-dependent, subunit (protein P) of glycine cleavage complex [Escherichia coli str. K-12 substr. MG1655]
PKA_4.07705.07705.3.dta	4.8179	3	K.GKKT*VVIDFDIGLR.N	gi|16129138|ref|NP_415693.1| membrane ATPase of the MinC-MinD-MinE system [Escherichia coli str. K-12 substr. MG1655]
PKA_4.07797.07797.3.dta	3.5398	3	K.RGS*AIDLPVYSYVEHTR.M	gi|90111379|ref|NP_416570.2| uridine/cytidine kinase [Escherichia coli str. K-12 substr. MG1655]
PKA_4.07801.07801.4.dta	3.1415	4	K.SRPS*LPERIDNVLVCPNSNCISHAEPVSSSFAVR.K	gi|16132066|ref|NP_418665.1| aspartate carbamoyltransferase, regulatory subunit [Escherichia coli str. K-12 substr. MG1655]
PKA_4.07909.07909.3.dta	3.1771	3	R.RALENGEQVKLS*GFGNFDLR.D	gi|16129668|ref|NP_416227.1| integration host factor (IHF), DNA-binding protein, alpha subunit [Escherichia coli str. K-12 substr. MG1655]
PKA_4.07918.07918.3.dta	4.3838	3	K.TYDGIHRIS*FLIDADGK.I	gi|16130405|ref|NP_416975.1| thiol peroxidase, thioredoxin-dependent [Escherichia coli str. K-12 substr. MG1655]
PKA_4.08051.08051.2.dta	3.3046	2	R.KIS*WMEIYTGEK.S	gi|16129099|ref|NP_415654.1| e14 prophage; isocitrate dehydrogenase, specific for NADP+ [Escherichia coli str. K-12 substr. MG1655]
PKA_4.08053.08053.3.dta	4.0798	3	R.KGMAS*GAVIESFLDKGR.G	gi|16131060|ref|NP_417637.1| fused protein chain initiation factor 2, IF2: membrane protein/conserved protein [Escherichia coli str. K-12 substr. MG1655]
PKA_4.08118.08118.3.dta	4.4507	3	R.KT*HNQGVFDVYTPDILR.C	gi|16128870|ref|NP_415423.1| pyruvate formate lyase I [Escherichia coli str. K-12 substr. MG1655]
PKA_4.08734.08734.3.dta	3.6057	3	R.EKVDAT*KQYDINEAIALLK.E	gi|16131814|ref|NP_418411.1| 50S ribosomal subunit protein L1 [Escherichia coli str. K-12 substr. MG1655]
PKA_4.08990.08990.4.dta	3.0175	4	R.IDEVVVFHPLGEQHIAS*IAQIQLKR.L	gi|16130513|ref|NP_417083.1| protein disaggregation chaperone [Escherichia coli str. K-12 substr. MG1655]
PKA_4.09014.09014.4.dta	3.6627	4	R.KLSLEPLIAHRGS*FES*FAQAVR.D	gi|16130029|ref|NP_416594.1| galactitol-1-phosphate dehydrogenase, Zn-dependent and NAD(P)-binding [Escherichia coli str. K-12 substr. MG1655]
PKA_4.09268.09268.4.dta	3.1064	4	R.RQS*DREATIGVTDS*LVHLFANR.W	gi|16130809|ref|NP_417383.1| 2-octaprenyl-6-methoxyphenol hydroxylase, FAD/NAD(P)-binding [Escherichia coli str. K-12 substr. MG1655]
PKA_4.09281.09281.3.dta	3.2026	3	R.RST*IFPNMIGLTIAVHNGR.Q	gi|16131195|ref|NP_417775.1| 30S ribosomal subunit protein S19 [Escherichia coli str. K-12 substr. MG1655]
PKA_4.09362.09362.4.dta	4.0306	4	R.KLS*LEPLIAHRGS*FESFAQAVR.D	gi|16130029|ref|NP_416594.1| galactitol-1-phosphate dehydrogenase, Zn-dependent and NAD(P)-binding [Escherichia coli str. K-12 substr. MG1655]
PKA_4.09422.09422.3.dta	3.1594	3	R.IEAVTGEGAIATVHADSDRLS*EVAHLLK.G	gi|16130604|ref|NP_417177.1| alanyl-tRNA synthetase [Escherichia coli str. K-12 substr. MG1655]
PKA_4.09467.09467.3.dta	4.3113	3	R.RST*IFPNMIGLTIAVHNGR.Q	gi|16131195|ref|NP_417775.1| 30S ribosomal subunit protein S19 [Escherichia coli str. K-12 substr. MG1655]
PKA_4.09531.09531.4.dta	3.3225	4	K.VCEYIAET*SAHDKTASFLYALGWTQHSVGAQNIR.T	gi|16131734|ref|NP_418330.1| formate dehydrogenase-O, large subunit [Escherichia coli str. K-12 substr. MG1655]
PKA_4.09680.09680.4.dta	3.0407	4	K.TNLAGLMDGYFHHEAS*IEGGQHLNVNVMNR.E	gi|16128870|ref|NP_415423.1| pyruvate formate lyase I [Escherichia coli str. K-12 substr. MG1655]
PKA_4.10034.10034.3.dta	4.3842	3	R.IRFT*TSHPIEFTDDIIEVYR.D	gi|16128644|ref|NP_415194.1| isopentenyl-adenosine A37 tRNA methylthiolase [Escherichia coli str. K-12 substr. MG1655]
PKA_4.10050.10050.3.dta	3.1604	3	R.RS*T*IFPNMIGLTIAVHNGR.Q	gi|16131195|ref|NP_417775.1| 30S ribosomal subunit protein S19 [Escherichia coli str. K-12 substr. MG1655]
PKA_4.10154.10154.3.dta	3.4082	3	K.RHNT*VPLSFADGYPYLLANEASLR.D	gi|16128914|ref|NP_415467.1| predicted 2Fe-2S cluster-containing protein [Escherichia coli str. K-12 substr. MG1655]
PKA_4.10355.10355.3.dta	3.4348	3	R.SGKSELEAFEVALENVRPT*VEVK.S	gi|16131220|ref|NP_417800.1| 30S ribosomal subunit protein S7 [Escherichia coli str. K-12 substr. MG1655]
PKA_5678.00877.00877.3.dta	3.1881	3	R.RGKT*VVVEGCEEK.L	gi|16129500|ref|NP_416059.1| conserved protein [Escherichia coli str. K-12 substr. MG1655]
PKA_5678.01422.01422.3.dta	3.2196	3	R.KGS*GIHVVSNQPR.H	gi|90111537|ref|NP_417565.2| DNA-binding transcriptional repressor [Escherichia coli str. K-12 substr. MG1655]
PKA_5678.01603.01603.2.dta	2.5171	2	R.RPT*RPADFDAR.M	gi|16131430|ref|NP_418016.1| glycine tRNA synthetase, beta subunit [Escherichia coli str. K-12 substr. MG1655]
PKA_5678.01860.01860.2.dta	2.5393	2	K.T*IIKDKGT*MSVLT*NAK.A	gi|90111474|ref|NP_417134.2| adhesin-like autotransporter [Escherichia coli str. K-12 substr. MG1655]
PKA_5678.01876.01876.3.dta	3.2172	3	R.LHHANDTDS*FSATNVH.-	gi|90111364|ref|NP_416484.2| conserved protein [Escherichia coli str. K-12 substr. MG1655]
PKA_5678.02016.02016.2.dta	2.7605	2	R.KLS*YTGEVK.A	gi|16128002|ref|NP_414549.1| transaldolase B [Escherichia coli str. K-12 substr. MG1655]
PKA_5678.02034.02034.2.dta	2.6247	2	K.IKLEEVKAS*SR.Q	gi|16128788|ref|NP_415341.1| fused predicted transporter subunits of ABC superfamily: ATP-binding components [Escherichia coli str. K-12 substr. MG1655]
PKA_5678.02385.02385.3.dta	3.6029	3	K.KHT*IEVVVDR.F	gi|16131884|ref|NP_418482.1| ATPase and DNA damage recognition protein of nucleotide excision repair excinuclease UvrABC [Escherichia coli str. K-12 substr. MG1655]
PKA_5678.03136.03136.3.dta	3.4513	3	K.RFHT*LSGGKPQVEGAEDYTDSDD.-	gi|16131624|ref|NP_418213.1| conserved protein [Escherichia coli str. K-12 substr. MG1655]
PKA_5678.03156.03156.2.dta	2.4011	2	K.KIS*EHLLPR.T	gi|16130670|ref|NP_417243.1| sulfite reductase, beta subunit, NAD(P)-binding, heme-binding [Escherichia coli str. K-12 substr. MG1655]
PKA_5678.03385.03385.3.dta	3.2347	3	R.RLEARPT*ADLCIDCK.T	gi|16128138|ref|NP_414687.1| DNA-binding transcriptional regulator of rRNA transcription, DnaK suppressor protein [Escherichia coli str. K-12 substr. MG1655]
PKA_5678.04133.04133.3.dta	3.273	3	K.EHGYETVVM#GAS*FR.N	gi|16128002|ref|NP_414549.1| transaldolase B [Escherichia coli str. K-12 substr. MG1655]
PKA_5678.04181.04181.3.dta	3.157	3	K.HVRLS*GELTMAADK.I	gi|16130084|ref|NP_416651.1| Dihydropyrimidine dehydrogenase, NADH-dependent, subunit A [Escherichia coli str. K-12 substr. MG1655]
PKA_5678.04218.04218.3.dta	3.2156	3	R.HLS*EAEIDNYVRK.E	gi|90111211|ref|NP_415605.2| predicted protein [Escherichia coli str. K-12 substr. MG1655]
PKA_5678.04246.04246.3.dta	3.4387	3	R.KPRLS*DYGVQLR.E	gi|16131175|ref|NP_417755.1| 30S ribosomal subunit protein S4 [Escherichia coli str. K-12 substr. MG1655]
PKA_5678.04529.04529.3.dta	3.6001	3	R.RS*HDALTAVTSLSVDKTSGEK.H	gi|16129052|ref|NP_415607.1| 50S ribosomal subunit protein L32 [Escherichia coli str. K-12 substr. MG1655]
PKA_5678.04594.04594.3.dta	3.7172	3	R.YHS*IIIM#TDADVDGSHIR.T	gi|49176395|ref|YP_026241.1| DNA gyrase, subunit B [Escherichia coli str. K-12 substr. MG1655]
PKA_5678.04895.04895.3.dta	3.5149	3	R.VKHPS*EIVNVGDEITVK.V	gi|16128878|ref|NP_415431.1| 30S ribosomal subunit protein S1 [Escherichia coli str. K-12 substr. MG1655]
PKA_5678.05082.05082.3.dta	3.244	3	K.ERFT*VLISPHVNK.D	gi|16131200|ref|NP_417780.1| 30S ribosomal subunit protein S10 [Escherichia coli str. K-12 substr. MG1655]
PKA_5678.05612.05612.4.dta	3.2477	4	K.LT*LVSTVSLLLWILMMTIFISTMS*INR.L	##gi|16130525|ref|NP_417095.1| predicted diguanylate cyclase [Escherichia coli str. K-12 substr. MG1655]
PKA_5678.05614.05614.3.dta	3.0498	3	R.AGLGHEHKPVGS*FLFAGPTGVGK.T	gi|16128850|ref|NP_415403.1| ATPase and specificity subunit of ClpA-ClpP ATP-dependent serine protease, chaperone activity [Escherichia coli str. K-12 substr. MG1655]
PKA_5678.06328.06328.3.dta	4.174	3	R.KGT*AISLVEAHDHLLLGK.V	gi|16130501|ref|NP_417071.1| ATP-dependent RNA helicase [Escherichia coli str. K-12 substr. MG1655]
PKA_5678.06546.06546.3.dta	3.029	3	R.RRPYS*VILLDEVEK.A	gi|16130513|ref|NP_417083.1| protein disaggregation chaperone [Escherichia coli str. K-12 substr. MG1655]
PKA_5678.06611.06611.3.dta	4.5393	3	K.GKKT*VVIDFDIGLR.N	gi|16129138|ref|NP_415693.1| membrane ATPase of the MinC-MinD-MinE system [Escherichia coli str. K-12 substr. MG1655]
PKA_5678.07143.07143.3.dta	3.0524	3	R.LISGKPS*PQNITVATHM#TLK.-	gi|16129281|ref|NP_415836.1| predicted DNA-binding transcriptional regulator [Escherichia coli str. K-12 substr. MG1655]
PKA_5678.07398.07398.4.dta	3.2943	4	R.DNHFKLT*GRPICVTAAADILR.S	gi|145698230|ref|NP_415193.2| predicted protein with nucleoside triphosphate hydrolase domain [Escherichia coli str. K-12 substr. MG1655]
PKA_5678.08402.08402.3.dta	3.1319	3	R.RHS*FISTLLGIK.H	gi|16130658|ref|NP_417231.1| sulfate adenylyltransferase, subunit 1 [Escherichia coli str. K-12 substr. MG1655]
PKA_5678.09399.09399.3.dta	3.9599	3	R.KKLS*EM#VEEELEQMIR.R	gi|49176329|ref|NP_417693.3| DNA-binding transcriptional dual regulator [Escherichia coli str. K-12 substr. MG1655]
PKA_5678.09674.09674.4.dta	3.2507	4	R.RDS*HPM#AVM#CGITGALAAFYHDSLDVNNPR.H	gi|16128695|ref|NP_415248.1| citrate synthase [Escherichia coli str. K-12 substr. MG1655]
PKA_5678.10210.10210.4.dta	3.9255	4	R.NRLHS*LLDEGSLVELGSELEPKDVLK.F	gi|16130251|ref|NP_416819.1| acetyl-CoA carboxylase, beta (carboxyltranferase) subunit [Escherichia coli str. K-12 substr. MG1655]

## Sheet: CK II
Spectral file	Sequest Xcorr	Z	Peptide	E. coli Protein
CKII_1.01014.01014.2.dta	3.2848	2	R.IQAEKS*QQS*SY.-	gi|16130603|ref|NP_417176.1| pleiotropic regulatory protein for carbon source metabolism [Escherichia coli str. K-12 substr. MG1655]
CKII_1.01318.01318.2.dta	2.6432	2	R.IQAEKS*QQS*SY.-	gi|16130603|ref|NP_417176.1| pleiotropic regulatory protein for carbon source metabolism [Escherichia coli str. K-12 substr. MG1655]
CKII_1.01432.01432.2.dta	2.5974	2	R.IQAEKS*QQS*SY.-	gi|16130603|ref|NP_417176.1| pleiotropic regulatory protein for carbon source metabolism [Escherichia coli str. K-12 substr. MG1655]
CKII_1.01609.01609.2.dta	2.7837	2	R.IQAEKS*QQS*S*Y.-	gi|16130603|ref|NP_417176.1| pleiotropic regulatory protein for carbon source metabolism [Escherichia coli str. K-12 substr. MG1655]
CKII_1.01735.01735.2.dta	2.376	2	R.IQAEKS*QQS*S*Y.-	gi|16130603|ref|NP_417176.1| pleiotropic regulatory protein for carbon source metabolism [Escherichia coli str. K-12 substr. MG1655]
CKII_1.02467.02467.2.dta	2.8604	2	R.IQAEKS*QQSS*Y.-	gi|16130603|ref|NP_417176.1| pleiotropic regulatory protein for carbon source metabolism [Escherichia coli str. K-12 substr. MG1655]
CKII_1.02583.02583.2.dta	3.1546	2	R.IQAEKS*QQS*SY.-	gi|16130603|ref|NP_417176.1| pleiotropic regulatory protein for carbon source metabolism [Escherichia coli str. K-12 substr. MG1655]
CKII_1.03079.03079.2.dta	2.5061	2	R.YAVT*DAES*AR.E	gi|16130176|ref|NP_416744.1| sn-glycerol-3-phosphate dehydrogenase (anaerobic), large subunit, FAD/NAD(P)-binding [Escherichia coli str. K-12 substr. MG1655]
CKII_1.03145.03145.2.dta	2.66	2	R.TVDLT*DKPS*.-	gi|16130190|ref|NP_416758.1| fused UDP-L-Ara4N formyltransferase/UDP-GlcA C-4'-decarboxylase [Escherichia coli str. K-12 substr. MG1655]
CKII_1.03167.03167.2.dta	2.4187	2	R.TVDLT*DKPS*.-	gi|16130190|ref|NP_416758.1| fused UDP-L-Ara4N formyltransferase/UDP-GlcA C-4'-decarboxylase [Escherichia coli str. K-12 substr. MG1655]
CKII_1.03189.03189.2.dta	2.372	2	R.IQAEKS*QQSS*Y.-	gi|16130603|ref|NP_417176.1| pleiotropic regulatory protein for carbon source metabolism [Escherichia coli str. K-12 substr. MG1655]
CKII_1.03468.03468.2.dta	2.6771	2	R.LAES*EAS*NDQAPVQM#PR.D	gi|90111560|ref|NP_417700.2| conserved protein [Escherichia coli str. K-12 substr. MG1655]
CKII_1.03777.03777.2.dta	3.2365	2	R.VNQS*DIS*DAQIK.K	gi|16130966|ref|NP_417542.1| predicted transcriptional regulator [Escherichia coli str. K-12 substr. MG1655]
CKII_1.03914.03914.3.dta	4.0204	3	K.ALNVEEQS*VQET*EQEER.V	gi|16129047|ref|NP_415602.1| fused ribonucleaseE: endoribonuclease/RNA-binding protein/RNA degradosome binding protein [Escherichia coli str. K-12 substr. MG1655]
CKII_1.04024.04024.2.dta	2.5819	2	R.FQPDT*AS*EGY.-	gi|16130928|ref|NP_417504.1| cyclic 3',5'-adenosine monophosphate phosphodiesterase [Escherichia coli str. K-12 substr. MG1655]
CKII_1.04043.04043.2.dta	3.0621	2	R.AVT*DS*DEPPVVR.Y	gi|16131262|ref|NP_417843.1| tryptophanyl-tRNA synthetase [Escherichia coli str. K-12 substr. MG1655]
CKII_1.04062.04062.2.dta	3.4036	2	R.ITSVDT*PLGGDS*EK.A	gi|16130648|ref|NP_417221.1| RNA polymerase, sigma S (sigma 38) factor [Escherichia coli str. K-12 substr. MG1655]
CKII_1.04166.04166.2.dta	2.6386	2	R.AVT*DS*DEPPVVR.Y	gi|16131262|ref|NP_417843.1| tryptophanyl-tRNA synthetase [Escherichia coli str. K-12 substr. MG1655]
CKII_1.04244.04244.2.dta	2.4745	2	K.S*VVNDT*DGIVR.V	gi|16130029|ref|NP_416594.1| galactitol-1-phosphate dehydrogenase, Zn-dependent and NAD(P)-binding [Escherichia coli str. K-12 substr. MG1655]
CKII_1.04298.04298.2.dta	3.5125	2	R.AVT*DS*DEPPVVR.Y	gi|16131262|ref|NP_417843.1| tryptophanyl-tRNA synthetase [Escherichia coli str. K-12 substr. MG1655]
CKII_1.04308.04308.2.dta	3.098	2	R.AVT*DS*DEPPVVR.Y	gi|16131262|ref|NP_417843.1| tryptophanyl-tRNA synthetase [Escherichia coli str. K-12 substr. MG1655]
CKII_1.04550.04550.2.dta	2.4577	2	R.VLEQS*AES*VPEYGK.A	gi|145698230|ref|NP_415193.2| predicted protein with nucleoside triphosphate hydrolase domain [Escherichia coli str. K-12 substr. MG1655]
CKII_1.04614.04614.2.dta	2.4314	2	-.METTQTST*IAS*K.D	gi|16130703|ref|NP_417276.1| predicted serine transporter [Escherichia coli str. K-12 substr. MG1655]
CKII_1.04715.04715.2.dta	2.7957	2	R.DAS*ES*DVEASLDR.L	gi|16128698|ref|NP_415251.1| succinate dehydrogenase, flavoprotein subunit [Escherichia coli str. K-12 substr. MG1655]
CKII_1.04844.04844.2.dta	2.6044	2	R.DAS*ES*DVEASLDR.L	gi|16128698|ref|NP_415251.1| succinate dehydrogenase, flavoprotein subunit [Escherichia coli str. K-12 substr. MG1655]
CKII_1.04862.04862.3.dta	4.1159	3	K.AANAGGVAT*S*GLEM#AQNAAR.L	gi|16129715|ref|NP_416275.1| glutamate dehydrogenase, NADP-specific [Escherichia coli str. K-12 substr. MG1655]
CKII_1.04986.04986.2.dta	3.9874	2	R.DAS*ES*DVEASLDR.L	gi|16128698|ref|NP_415251.1| succinate dehydrogenase, flavoprotein subunit [Escherichia coli str. K-12 substr. MG1655]
CKII_1.05012.05012.2.dta	2.3764	2	K.EIET*DT*EGYLK.E	gi|90111197|ref|NP_415489.4| predicted sulfite reductase subunit [Escherichia coli str. K-12 substr. MG1655]
CKII_1.05116.05116.2.dta	2.7233	2	R.DAS*ES*DVEASLDR.L	gi|16128698|ref|NP_415251.1| succinate dehydrogenase, flavoprotein subunit [Escherichia coli str. K-12 substr. MG1655]
CKII_1.05383.05383.2.dta	2.4413	2	K.LPSPQVVGAES*EEEDAS*HAA.-	gi|16129801|ref|NP_416362.1| conserved protein regulated by LexA [Escherichia coli str. K-12 substr. MG1655]
CKII_1.05486.05486.2.dta	4.0533	2	R.LVIT*S*DEGVR.A	gi|16131895|ref|NP_418493.1| acetyl-CoA synthetase [Escherichia coli str. K-12 substr. MG1655]
CKII_1.05613.05613.2.dta	4.4445	2	R.LVIT*S*DEGVR.A	gi|16131895|ref|NP_418493.1| acetyl-CoA synthetase [Escherichia coli str. K-12 substr. MG1655]
CKII_1.05639.05639.2.dta	2.8451	2	R.ALLENT*ELS*AR.E	gi|16131770|ref|NP_418367.1| peptidase component of the HslUV protease [Escherichia coli str. K-12 substr. MG1655]
CKII_1.05910.05910.2.dta	2.7944	2	K.VEQAFELT*DAS*AER.S	gi|16128111|ref|NP_414660.1| bifunctional aconitate hydratase 2/2-methylisocitrate dehydratase [Escherichia coli str. K-12 substr. MG1655]
CKII_1.05993.05993.2.dta	3.1234	2	R.VET*GS*GIGFGATVK.A	gi|16128423|ref|NP_414972.1| ATPase and specificity subunit of ClpX-ClpP ATP-dependent serine protease [Escherichia coli str. K-12 substr. MG1655]
CKII_1.06091.06091.2.dta	2.6284	2	K.EDIDAEQLAT*GDLS*ER.L	gi|16128074|ref|NP_414623.1| conserved protein [Escherichia coli str. K-12 substr. MG1655]
CKII_1.06334.06334.2.dta	2.4662	2	R.DAS*ES*DVEASLDR.L	gi|16128698|ref|NP_415251.1| succinate dehydrogenase, flavoprotein subunit [Escherichia coli str. K-12 substr. MG1655]
CKII_1.06749.06749.2.dta	2.8169	2	R.DAS*ES*DVEASLDR.L	gi|16128698|ref|NP_415251.1| succinate dehydrogenase, flavoprotein subunit [Escherichia coli str. K-12 substr. MG1655]
CKII_1.06803.06803.2.dta	5.2435	2	R.AGLINSGGAAGGET*DLS*DAVR.T	gi|90111385|ref|NP_416600.4| fructose-bisphosphate aldolase class I [Escherichia coli str. K-12 substr. MG1655]
CKII_1.06842.06842.2.dta	3.299	2	K.ALLETTS*QDT*EDDWSR.L	gi|16129125|ref|NP_415680.1| predicted DNA-binding transcriptional regulator [Escherichia coli str. K-12 substr. MG1655]
CKII_1.06942.06942.2.dta	2.7986	2	R.SQDLASQAEES*FVEAE.-	gi|16128162|ref|NP_414711.1| 30S ribosomal subunit protein S2 [Escherichia coli str. K-12 substr. MG1655]
CKII_1.07091.07091.2.dta	3.2168	2	R.LIS*AGT*TLPEDVADR.A	gi|16129813|ref|NP_416374.1| ATP-dependent DNA helicase, component of RuvABC resolvasome [Escherichia coli str. K-12 substr. MG1655]
CKII_1.07211.07211.2.dta	3.203	2	R.LIS*AGT*TLPEDVADR.A	gi|16129813|ref|NP_416374.1| ATP-dependent DNA helicase, component of RuvABC resolvasome [Escherichia coli str. K-12 substr. MG1655]
CKII_1.07297.07297.2.dta	3.6161	2	R.SQDLAS*QAEES*FVEAE.-	gi|16128162|ref|NP_414711.1| 30S ribosomal subunit protein S2 [Escherichia coli str. K-12 substr. MG1655]
CKII_1.07569.07569.2.dta	2.8833	2	R.SQDLAS*QAEES*FVEAE.-	gi|16128162|ref|NP_414711.1| 30S ribosomal subunit protein S2 [Escherichia coli str. K-12 substr. MG1655]
CKII_1.07603.07603.2.dta	3.4918	2	R.SQDLAS*QAEES*FVEAE.-	gi|16128162|ref|NP_414711.1| 30S ribosomal subunit protein S2 [Escherichia coli str. K-12 substr. MG1655]
CKII_1.08023.08023.2.dta	3.1923	2	R.FAPALNVS*EEEVT*TGLDR.F	gi|16129702|ref|NP_416262.1| succinylornithine transaminase, PLP-dependent [Escherichia coli str. K-12 substr. MG1655]
CKII_1.08251.08251.2.dta	3.2926	2	K.AVYADT*EGFVS*EMDTR.A	gi|16132199|ref|NP_418799.1| thymidine phosphorylase [Escherichia coli str. K-12 substr. MG1655]
CKII_1.09142.09142.2.dta	3.3978	2	R.SQDLAS*QAEESFVEAE.-	gi|16128162|ref|NP_414711.1| 30S ribosomal subunit protein S2 [Escherichia coli str. K-12 substr. MG1655]
CKII_1.10305.10305.2.dta	2.4237	2	K.YDS*GCGWPSFYEPVSEESIR.Y	gi|16129732|ref|NP_416292.1| methionine sulfoxide reductase B [Escherichia coli str. K-12 substr. MG1655]
CKII_1.10423.10423.2.dta	2.8014	2	K.YDS*GCGWPSFYEPVSEESIR.Y	gi|16129732|ref|NP_416292.1| methionine sulfoxide reductase B [Escherichia coli str. K-12 substr. MG1655]
CKII_1.11661.11661.2.dta	2.9348	2	R.VPFAEVAS*DGS*EAFPFLR.N	gi|16129022|ref|NP_415577.1| N-methyltryptophan oxidase, FAD-binding [Escherichia coli str. K-12 substr. MG1655]
CKII_2.02543.02543.2.dta	3.3851	2	R.LAES*EASNDQAPVQM#PR.D	gi|90111560|ref|NP_417700.2| conserved protein [Escherichia coli str. K-12 substr. MG1655]
CKII_2.02637.02637.2.dta	3.49	2	R.LAES*EASNDQAPVQM#PR.D	gi|90111560|ref|NP_417700.2| conserved protein [Escherichia coli str. K-12 substr. MG1655]
CKII_2.02780.02780.2.dta	2.9277	2	R.QDKLDAEAS*ADKK.R	gi|16130431|ref|NP_417001.1| conserved protein [Escherichia coli str. K-12 substr. MG1655]
CKII_2.02957.02957.2.dta	2.8731	2	K.ALNVEEQS*VQET*EQEER.V	gi|16129047|ref|NP_415602.1| fused ribonucleaseE: endoribonuclease/RNA-binding protein/RNA degradosome binding protein [Escherichia coli str. K-12 substr. MG1655]
CKII_2.03008.03008.2.dta	3.9495	2	R.DEGYIS*DSGDAEPAETM#K.V	gi|90111678|ref|NP_418465.4| glycerol-3-phosphate O-acyltransferase [Escherichia coli str. K-12 substr. MG1655]
CKII_2.03560.03560.2.dta	4.932	2	R.VAM#LSYSTGTSGAGS*DVEK.V	gi|16130232|ref|NP_416800.1| phosphate acetyltransferase [Escherichia coli str. K-12 substr. MG1655]
CKII_2.03573.03573.2.dta	3.6645	2	-.M#S*DNDTIVAQATPPGR.G	gi|16131574|ref|NP_418162.1| GTPase [Escherichia coli str. K-12 substr. MG1655]
CKII_2.03643.03643.2.dta	2.9418	2	R.IGS*DAYNQGLSER.R	gi|16128924|ref|NP_415477.1| outer membrane protein A (3a;II*;G;d) [Escherichia coli str. K-12 substr. MG1655]
CKII_2.03645.03645.2.dta	3.17	2	K.EAGACGVS*DNAATFAEK.L	gi|16130643|ref|NP_417216.1| predicted dehydrogenase, with NAD(P)-binding Rossmann-fold domain [Escherichia coli str. K-12 substr. MG1655]
CKII_2.03651.03651.2.dta	2.9261	2	R.VLEQS*AESVPEYGK.A	gi|145698230|ref|NP_415193.2| predicted protein with nucleoside triphosphate hydrolase domain [Escherichia coli str. K-12 substr. MG1655]
CKII_2.03726.03726.2.dta	3.56	2	R.DAS*ESDVEASLDR.L	gi|16128698|ref|NP_415251.1| succinate dehydrogenase, flavoprotein subunit [Escherichia coli str. K-12 substr. MG1655]
CKII_2.03727.03727.2.dta	3.3581	2	R.DDDS*YDEDVEDDEGVGEVR.V	gi|16130338|ref|NP_416907.1| cell division protein involved in Z ring assembly [Escherichia coli str. K-12 substr. MG1655]
CKII_2.03851.03851.2.dta	3.1013	2	R.ITSVDTPLGGDS*EK.A	gi|16130648|ref|NP_417221.1| RNA polymerase, sigma S (sigma 38) factor [Escherichia coli str. K-12 substr. MG1655]
CKII_2.03923.03923.2.dta	3.9004	2	K.NLM#S*DGNVQIVK.T	gi|16129622|ref|NP_416181.1| conserved protein [Escherichia coli str. K-12 substr. MG1655]
CKII_2.04010.04010.2.dta	3.5625	2	R.DASES*DVEASLDR.L	gi|16128698|ref|NP_415251.1| succinate dehydrogenase, flavoprotein subunit [Escherichia coli str. K-12 substr. MG1655]
CKII_2.04037.04037.2.dta	2.8807	2	K.LGDS*ELYDQSR.K	gi|16131231|ref|NP_417811.1| fused predicted transporter subunits of ABC superfamily: ATP-binding components [Escherichia coli str. K-12 substr. MG1655]
CKII_2.04047.04047.2.dta	3.2851	2	R.LAES*EASNDQAPVQMPR.D	gi|90111560|ref|NP_417700.2| conserved protein [Escherichia coli str. K-12 substr. MG1655]
CKII_2.04079.04079.2.dta	3.3178	2	R.LGNTLGS*DGENLPK.A	gi|16132170|ref|NP_418769.1| DNA methylase M [Escherichia coli str. K-12 substr. MG1655]
CKII_2.04134.04134.2.dta	2.728	2	-.M#T*DDFAPDGQLAK.A	gi|16129762|ref|NP_416322.1| conserved protein with nucleoside triphosphate hydrolase domain [Escherichia coli str. K-12 substr. MG1655]
CKII_2.04143.04143.2.dta	3.4837	2	R.LAES*EASNDQAPVQMPR.D	gi|90111560|ref|NP_417700.2| conserved protein [Escherichia coli str. K-12 substr. MG1655]
CKII_2.04188.04188.2.dta	3.5362	2	R.ETQDSET*LDTADALEQK.E	gi|16131092|ref|NP_417669.1| RNA polymerase, sigma 54 (sigma N) factor [Escherichia coli str. K-12 substr. MG1655]
CKII_2.04307.04307.2.dta	4.7017	2	R.DDDS*YDEDVEDDEGVGEVR.V	gi|16130338|ref|NP_416907.1| cell division protein involved in Z ring assembly [Escherichia coli str. K-12 substr. MG1655]
CKII_2.04320.04320.2.dta	2.705	2	R.DASES*DVEASLDR.L	gi|16128698|ref|NP_415251.1| succinate dehydrogenase, flavoprotein subunit [Escherichia coli str. K-12 substr. MG1655]
CKII_2.04355.04355.2.dta	2.9213	2	R.ELGGNYYS*DPDVPPR.A	gi|90111217|ref|NP_415646.4| conserved protein [Escherichia coli str. K-12 substr. MG1655]
CKII_2.04407.04407.2.dta	4.9769	2	K.LGLS*YDDDEEEEEDEK.Q	gi|16131706|ref|NP_418302.1| conserved protein [Escherichia coli str. K-12 substr. MG1655]
CKII_2.04500.04500.2.dta	3.416	2	K.IAS*SGLCGSDLPR.I	gi|16130029|ref|NP_416594.1| galactitol-1-phosphate dehydrogenase, Zn-dependent and NAD(P)-binding [Escherichia coli str. K-12 substr. MG1655]
CKII_2.04574.04574.2.dta	3.4833	2	R.LTGVS*EELGATR.A	gi|90111130|ref|NP_414953.2| 2-carboxybenzaldehyde reductase, function unknown [Escherichia coli str. K-12 substr. MG1655]
CKII_2.04697.04697.2.dta	2.9609	2	R.ANGYS*ELEISQK.R	gi|16129823|ref|NP_416384.1| predicted methyltransferase [Escherichia coli str. K-12 substr. MG1655]
CKII_2.04741.04741.2.dta	3.4747	2	K.AVYADTEGFVS*EM#DTR.A	gi|16132199|ref|NP_418799.1| thymidine phosphorylase [Escherichia coli str. K-12 substr. MG1655]
CKII_2.04872.04872.2.dta	2.9793	2	K.VETDFAAEVAAM#S*K.Q	gi|16128163|ref|NP_414712.1| protein chain elongation factor EF-Ts [Escherichia coli str. K-12 substr. MG1655]
CKII_2.04878.04878.2.dta	3.5127	2	R.VAMLSYSTGTSGAGS*DVEK.V	gi|16130232|ref|NP_416800.1| phosphate acetyltransferase [Escherichia coli str. K-12 substr. MG1655]
CKII_2.04943.04943.2.dta	2.7194	2	K.LPSPQVVGAES*EEEDASHAA.-	gi|16129801|ref|NP_416362.1| conserved protein regulated by LexA [Escherichia coli str. K-12 substr. MG1655]
CKII_2.05013.05013.2.dta	3.1034	2	K.DLVES*APAALK.E	gi|16131816|ref|NP_418413.1| 50S ribosomal subunit protein L7/L12 [Escherichia coli str. K-12 substr. MG1655]
CKII_2.05043.05043.2.dta	3.2679	2	R.IFYGDS*DNDITAAR.D	gi|16131881|ref|NP_418479.1| acid phosphatase/phosphotransferase, class B, non-specific [Escherichia coli str. K-12 substr. MG1655]
CKII_2.05091.05091.2.dta	3.2675	2	R.LPQVEGT*GGDVQPSQDLVR.V	gi|16130513|ref|NP_417083.1| protein disaggregation chaperone [Escherichia coli str. K-12 substr. MG1655]
CKII_2.05222.05222.2.dta	3.2341	2	R.DYS*EGASGLLR.T	gi|90111560|ref|NP_417700.2| conserved protein [Escherichia coli str. K-12 substr. MG1655]
CKII_2.05224.05224.2.dta	3.4582	2	K.VDLSTFS*DEEVM#R.L	gi|16131817|ref|NP_418414.1| RNA polymerase, beta subunit [Escherichia coli str. K-12 substr. MG1655]
CKII_2.05286.05286.2.dta	4.2177	2	K.TEIIEES*EGEVAGIK.S	gi|16130793|ref|NP_417367.1| peptide chain release factor RF-2 [Escherichia coli str. K-12 substr. MG1655]
CKII_2.05304.05304.2.dta	3.6707	2	R.DVS*GEGVQQALLK.L	gi|16128423|ref|NP_414972.1| ATPase and specificity subunit of ClpX-ClpP ATP-dependent serine protease [Escherichia coli str. K-12 substr. MG1655]
CKII_2.05332.05332.2.dta	3.3199	2	K.LINDAYDS*EYFATK.V	gi|16131764|ref|NP_418361.1| glycerol kinase [Escherichia coli str. K-12 substr. MG1655]
CKII_2.05343.05343.2.dta	3.1674	2	K.ALLETTSQDT*EDDWSR.L	gi|16129125|ref|NP_415680.1| predicted DNA-binding transcriptional regulator [Escherichia coli str. K-12 substr. MG1655]
CKII_2.05365.05365.2.dta	2.8153	2	R.LPQVEGT*GGDVQPSQDLVR.V	gi|16130513|ref|NP_417083.1| protein disaggregation chaperone [Escherichia coli str. K-12 substr. MG1655]
CKII_2.05369.05369.2.dta	3.6761	2	R.NEEPEIEEEIDES*EDETVDEER.V	gi|16131266|ref|NP_417847.1| predicted protein [Escherichia coli str. K-12 substr. MG1655]
CKII_2.05430.05430.2.dta	2.872	2	R.DVNTVS*EPDSQIPPGFRG.-	gi|16132183|ref|NP_418782.1| DNA biosynthesis protein (primosomal protein I) [Escherichia coli str. K-12 substr. MG1655]
CKII_2.05440.05440.2.dta	4.6268	2	R.TLQQAVQSGEYS*DYQEYAK.L	gi|16131102|ref|NP_417679.1| glutamate synthase, large subunit [Escherichia coli str. K-12 substr. MG1655]
CKII_2.05470.05470.2.dta	3.2404	2	R.GLS*EEEVQGEYELNTGK.V	gi|16132020|ref|NP_418619.1| L-ribulose 5-phosphate 4-epimerase [Escherichia coli str. K-12 substr. MG1655]
CKII_2.05483.05483.2.dta	4.1104	2	K.EDIDAEQLATGDLS*ER.L	gi|16128074|ref|NP_414623.1| conserved protein [Escherichia coli str. K-12 substr. MG1655]
CKII_2.05497.05497.2.dta	3.4891	2	R.S*GWDNVPAPAEPTYR.S	gi|16131570|ref|NP_418157.1| chromosomal replication initiator protein DnaA, DNA-binding transcriptional dual regulator [Escherichia coli str. K-12 substr. MG1655]
CKII_2.05515.05515.2.dta	4.2744	2	K.VET*DFAAEVAAM#SK.Q	gi|16128163|ref|NP_414712.1| protein chain elongation factor EF-Ts [Escherichia coli str. K-12 substr. MG1655]
CKII_2.05521.05521.2.dta	3.879	2	R.DVDLTLVGS*CDENGQPR.V	gi|16130635|ref|NP_417208.1| protein required for maturation of hydrogenases 1 and 3 [Escherichia coli str. K-12 substr. MG1655]
CKII_2.05534.05534.2.dta	3.2785	2	R.GLVAQVT*DEEALAER.L	gi|16129595|ref|NP_416154.1| tyrosyl-tRNA synthetase [Escherichia coli str. K-12 substr. MG1655]
CKII_2.05578.05578.2.dta	2.7093	2	K.LFT*DM#CEGLPEK.R	gi|16128327|ref|NP_414876.1| thiogalactoside acetyltransferase [Escherichia coli str. K-12 substr. MG1655]
CKII_2.05579.05579.2.dta	3.2358	2	R.DFS*EEEIIAR.M	gi|16131692|ref|NP_418288.1| fused 3-hydroxybutyryl-CoA epimerase/delta(3)-cis-delta(2)-trans-enoyl-CoA isomerase/enoyl-CoA hydratase/3-hydroxyacyl-CoA dehydrogenase [Escherichia coli str. K-12 substr. MG1655]
CKII_2.05604.05604.2.dta	3.7953	2	R.FS*DGEVSVQINENVR.G	gi|16129170|ref|NP_415725.1| phosphoribosylpyrophosphate synthase [Escherichia coli str. K-12 substr. MG1655]
CKII_2.05610.05610.2.dta	3.6767	2	K.VET*DFAAEVAAM#SK.Q	gi|16128163|ref|NP_414712.1| protein chain elongation factor EF-Ts [Escherichia coli str. K-12 substr. MG1655]
CKII_2.05621.05621.2.dta	4.4144	2	R.SQDLAS*QAEES*FVEAE.-	gi|16128162|ref|NP_414711.1| 30S ribosomal subunit protein S2 [Escherichia coli str. K-12 substr. MG1655]
CKII_2.05661.05661.2.dta	4.1477	2	R.AGLINSGGAAGGET*DLSDAVR.T	gi|90111385|ref|NP_416600.4| fructose-bisphosphate aldolase class I [Escherichia coli str. K-12 substr. MG1655]
CKII_2.05700.05700.2.dta	3.8091	2	K.ISELS*EGQIDTLR.D	gi|16131177|ref|NP_417757.1| 30S ribosomal subunit protein S13 [Escherichia coli str. K-12 substr. MG1655]
CKII_2.05729.05729.2.dta	4.8024	2	R.FM#GLEM#S*DDGALEVAR.R	gi|16129813|ref|NP_416374.1| ATP-dependent DNA helicase, component of RuvABC resolvasome [Escherichia coli str. K-12 substr. MG1655]
CKII_2.05737.05737.2.dta	4.1164	2	K.NLMS*DGNVQIVK.T	gi|16129622|ref|NP_416181.1| conserved protein [Escherichia coli str. K-12 substr. MG1655]
CKII_2.05741.05741.2.dta	2.9274	2	R.EGSSLLGS*DAGELAGAGK.T	gi|16128025|ref|NP_414572.1| dihydrodipicolinate reductase [Escherichia coli str. K-12 substr. MG1655]
CKII_2.05749.05749.2.dta	3.317	2	K.EAPDGVAT*EM#LDEGLVR.E	gi|16129247|ref|NP_415802.1| ribonuclease II [Escherichia coli str. K-12 substr. MG1655]
CKII_2.05756.05756.2.dta	3.7852	2	R.EINPDLAEQAVS*QDEEYR.L	gi|16131681|ref|NP_418276.1| predicted recombination limiting protein [Escherichia coli str. K-12 substr. MG1655]
CKII_2.05759.05759.2.dta	3.9079	2	K.LINDAYDS*EYFATK.V	gi|16131764|ref|NP_418361.1| glycerol kinase [Escherichia coli str. K-12 substr. MG1655]
CKII_2.05839.05839.2.dta	3.156	2	K.LNSAAIS*DYAPNGLQVEGK.E	gi|16128685|ref|NP_415238.1| conserved metal-binding protein [Escherichia coli str. K-12 substr. MG1655]
CKII_2.05840.05840.2.dta	3.1539	2	K.GLIDPGES*VYEAANR.E	gi|16131274|ref|NP_417856.1| ADP-ribose diphosphatase [Escherichia coli str. K-12 substr. MG1655]
CKII_2.05845.05845.2.dta	3.4114	2	R.AVYDS*EDYQEGM#NAFLEK.R	gi|90111512|ref|NP_417394.4| methylmalonyl-CoA decarboxylase, biotin-independent [Escherichia coli str. K-12 substr. MG1655]
CKII_2.05850.05850.2.dta	3.1085	2	R.LEEDDVAT*PGEGQVLLR.T	gi|145698259|ref|NP_415966.5| predicted oxidoreductase, Zn-dependent and NAD(P)-binding [Escherichia coli str. K-12 substr. MG1655]
CKII_2.05908.05908.2.dta	3.6312	2	R.VFFCNS*GAEANEAALK.L	gi|16129702|ref|NP_416262.1| succinylornithine transaminase, PLP-dependent [Escherichia coli str. K-12 substr. MG1655]
CKII_2.05917.05917.2.dta	3.6864	2	K.IWEEGS*DEVLVK.A	gi|16128969|ref|NP_415523.1| predicted protein [Escherichia coli str. K-12 substr. MG1655]
CKII_2.05965.05965.2.dta	3.185	2	R.IGDGDQFS*SGFVEVNPNSK.I	gi|90111524|ref|NP_417463.4| predicted S-transferase [Escherichia coli str. K-12 substr. MG1655]
CKII_2.05995.05995.2.dta	3.3601	2	K.DGGDFDQFTGAT*ITPR.A	gi|16129589|ref|NP_416148.1| predicted oxidoreductase [Escherichia coli str. K-12 substr. MG1655]
CKII_2.06075.06075.3.dta	3.4806	3	R.QLAQQLNM#EFYDS*DQEIEK.R	gi|90111581|ref|YP_026215.2| shikimate kinase I [Escherichia coli str. K-12 substr. MG1655]
CKII_2.06078.06078.2.dta	3.6271	2	R.GIQLQVS*DAELAAR.R	gi|49176404|ref|YP_026248.1| dihydroxyacid dehydratase [Escherichia coli str. K-12 substr. MG1655]
CKII_2.06128.06128.2.dta	2.7625	2	K.GNES*DVYSSEIPAEFQK.L	gi|16132080|ref|NP_418679.1| valyl-tRNA synthetase [Escherichia coli str. K-12 substr. MG1655]
CKII_2.06137.06137.2.dta	3.3267	2	K.S*DVDALVNAVDR.A	gi|16130717|ref|NP_417290.1| cysteine sulfinate desulfinase [Escherichia coli str. K-12 substr. MG1655]
CKII_2.06146.06146.2.dta	3.0678	2	K.GNES*DVYSSEIPAEFQK.L	gi|16132080|ref|NP_418679.1| valyl-tRNA synthetase [Escherichia coli str. K-12 substr. MG1655]
CKII_2.06192.06192.2.dta	3.1717	2	R.EIGNGFS*ELNDAEDQAER.F	gi|16131955|ref|NP_418553.1| lysine tRNA synthetase, inducible [Escherichia coli str. K-12 substr. MG1655]
CKII_2.06262.06262.2.dta	3.0532	2	R.ELGIPAVVGCGDAT*ER.M	gi|16129658|ref|NP_416217.1| phosphoenolpyruvate synthase [Escherichia coli str. K-12 substr. MG1655]
CKII_2.06351.06351.3.dta	3.9855	3	R.AAVLCFAAESVAT*DCQR.E	gi|16130033|ref|NP_416598.1| D-tagatose 1,6-bisphosphate aldolase 2, subunit [Escherichia coli str. K-12 substr. MG1655]
CKII_2.06362.06362.2.dta	2.8034	2	R.GENWSVPLTYS*ENDEER.F	gi|90111737|ref|NP_418766.4| 5-methylcytosine-specific restriction enzyme McrBC, subunit McrB [Escherichia coli str. K-12 substr. MG1655]
CKII_2.06384.06384.2.dta	2.7586	2	R.QYS*ELEEEWK.A	gi|16130513|ref|NP_417083.1| protein disaggregation chaperone [Escherichia coli str. K-12 substr. MG1655]
CKII_2.06386.06386.2.dta	3.173	2	K.ALEM#IDM#HGGDLFS*EE.-	gi|90111564|ref|NP_417717.2| cell wall structural complex MreBCD, actin-like component MreB [Escherichia coli str. K-12 substr. MG1655]
CKII_2.06394.06394.2.dta	3.0377	2	R.LLS*DTECLVK.K	gi|16130401|ref|NP_416971.1| phosphoribosylaminoimidazole-succinocarboxamide synthetase [Escherichia coli str. K-12 substr. MG1655]
CKII_2.06395.06395.2.dta	3.3867	2	R.EIGNGFS*ELNDAEDQAER.F	gi|16131955|ref|NP_418553.1| lysine tRNA synthetase, inducible [Escherichia coli str. K-12 substr. MG1655]
CKII_2.06403.06403.2.dta	3.6656	2	R.NNLS*VSASPQDIGVLTR.K	gi|16131658|ref|NP_418250.1| adenylate cyclase [Escherichia coli str. K-12 substr. MG1655]
CKII_2.06446.06446.2.dta	3.1229	2	K.LGSIGS*DLGASIK.G	gi|90111653|ref|NP_418280.4| TatABCE protein translocation system subunit [Escherichia coli str. K-12 substr. MG1655]
CKII_2.06470.06470.2.dta	3.4915	2	K.ALANFM#FDS*DEAM#VR.I	gi|16130513|ref|NP_417083.1| protein disaggregation chaperone [Escherichia coli str. K-12 substr. MG1655]
CKII_2.06498.06498.2.dta	2.8745	2	K.FGAIS*DWM#EAR.D	gi|16128292|ref|NP_414841.1| predicted amino acid dehydrogenase with NAD(P)-binding domain and ferridoxin-like domain [Escherichia coli str. K-12 substr. MG1655]
CKII_2.06517.06517.2.dta	3.3131	2	K.S*GEGLYFIDK.E	gi|16129855|ref|NP_416418.1| ferritin iron storage protein (cytoplasmic) [Escherichia coli str. K-12 substr. MG1655]
CKII_2.06530.06530.2.dta	4.9212	2	K.LM#DEDT*DEIYFTNVACR.Q	gi|145698245|ref|NP_415699.5| conserved protein [Escherichia coli str. K-12 substr. MG1655]
CKII_2.06598.06598.2.dta	3.0004	2	K.AVYADTEGFVS*EMDTR.A	gi|16132199|ref|NP_418799.1| thymidine phosphorylase [Escherichia coli str. K-12 substr. MG1655]
CKII_2.06618.06618.2.dta	4.3025	2	R.TLTDEDIAGYVAS*DEPLDK.A	gi|16131136|ref|NP_417714.1| conserved protein [Escherichia coli str. K-12 substr. MG1655]
CKII_2.06626.06626.2.dta	2.8437	2	K.LGILDDS*QLER.L	gi|16130962|ref|NP_417538.1| DNA primase [Escherichia coli str. K-12 substr. MG1655]
CKII_2.06632.06632.2.dta	2.8383	2	R.VT*DEDLVVEIPR.Y	gi|16130450|ref|NP_417020.1| [2Fe-2S] ferredoxin [Escherichia coli str. K-12 substr. MG1655]
CKII_2.06706.06706.2.dta	3.4562	2	K.YDEAPS*NVAQAVIEAR.G	gi|16131219|ref|NP_417799.1| protein chain elongation factor EF-G, GTP-binding [Escherichia coli str. K-12 substr. MG1655]
CKII_2.06718.06718.2.dta	3.107	2	R.VT*DEDLVVEIPR.Y	gi|16130450|ref|NP_417020.1| [2Fe-2S] ferredoxin [Escherichia coli str. K-12 substr. MG1655]
CKII_2.06757.06757.2.dta	4.1886	2	R.FAPALNVS*EEEVTTGLDR.F	gi|16129702|ref|NP_416262.1| succinylornithine transaminase, PLP-dependent [Escherichia coli str. K-12 substr. MG1655]
CKII_2.06760.06760.2.dta	4.1187	2	R.GENVLS*DAEGEDSPLLK.K	gi|90111244|ref|NP_415813.4| gamma-Glu-putrescine synthase [Escherichia coli str. K-12 substr. MG1655]
CKII_2.06767.06767.2.dta	3.8126	2	K.IM#TDVFFGGS*DVER.V	gi|49176343|ref|YP_026214.1| conserved protein [Escherichia coli str. K-12 substr. MG1655]
CKII_2.06796.06796.2.dta	2.894	2	K.TTLS*EEDQALFR.Q	gi|16130266|ref|NP_416834.1| conserved protein [Escherichia coli str. K-12 substr. MG1655]
CKII_2.06857.06857.2.dta	2.7431	2	K.GGYFPVPPVDS*AQDIR.S	gi|16131710|ref|NP_418306.1| glutamine synthetase [Escherichia coli str. K-12 substr. MG1655]
CKII_2.06883.06883.2.dta	3.7123	2	R.LPGLYYIET*DSTGER.T	gi|90111606|ref|NP_417983.2| ketodeoxygluconokinase [Escherichia coli str. K-12 substr. MG1655]
CKII_2.06955.06955.2.dta	3.33	2	K.DLS*DVTLGQFAGK.R	gi|16129285|ref|NP_415840.1| lipid hydroperoxide peroxidase [Escherichia coli str. K-12 substr. MG1655]
CKII_2.06998.06998.2.dta	3.6817	2	R.LDGEM#S*EGELVDAFR.H	gi|16128889|ref|NP_415442.1| Involved in chromosome partioning, Ca2+ binding protein [Escherichia coli str. K-12 substr. MG1655]
CKII_2.07005.07005.2.dta	3.4361	2	R.FLSELT*AAEGLER.Y	gi|16128701|ref|NP_415254.1| 2-oxoglutarate decarboxylase, thiamin-requiring [Escherichia coli str. K-12 substr. MG1655]
CKII_2.07058.07058.2.dta	3.0855	2	K.LQLT*DSYQLLEK.I	gi|16128968|ref|NP_415522.1| glucose-1-phosphatase/inositol phosphatase [Escherichia coli str. K-12 substr. MG1655]
CKII_2.07078.07078.2.dta	3.1846	2	R.AAPSYEELS*NSQELLETGIK.V	gi|16131600|ref|NP_418188.1| F1 sector of membrane-bound ATP synthase, beta subunit [Escherichia coli str. K-12 substr. MG1655]
CKII_2.07097.07097.2.dta	3.558	2	R.M#DAAQLTEEGYYS*VFGK.S	gi|16128111|ref|NP_414660.1| bifunctional aconitate hydratase 2/2-methylisocitrate dehydratase [Escherichia coli str. K-12 substr. MG1655]
CKII_2.07127.07127.2.dta	2.91	2	K.DDSFFDVYT*ECR.T	gi|90111643|ref|NP_418164.4| tryptophanase/L-cysteine desulfhydrase, PLP-dependent [Escherichia coli str. K-12 substr. MG1655]
CKII_2.07173.07173.2.dta	2.891	2	R.ELLS*QYDFPGDDTPIVR.G	gi|16131218|ref|NP_417798.1| protein chain elongation factor EF-Tu (duplicate of tufB) [Escherichia coli str. K-12 substr. MG1655]
CKII_2.07173.07173.2.dta	2.891	2	R.ELLS*QYDFPGDDTPIVR.G	gi|16131810|ref|NP_418407.1| protein chain elongation factor EF-Tu (duplicate of tufA) [Escherichia coli str. K-12 substr. MG1655]
CKII_2.07188.07188.2.dta	3.033	2	K.S*DFDLTPFR.L	gi|16129022|ref|NP_415577.1| N-methyltryptophan oxidase, FAD-binding [Escherichia coli str. K-12 substr. MG1655]
CKII_2.07210.07210.2.dta	3.7931	2	K.LDYQS*ESLVNEIYR.G	gi|16128388|ref|NP_414937.1| maltodextrin glucosidase [Escherichia coli str. K-12 substr. MG1655]
CKII_2.07233.07233.2.dta	3.4105	2	K.FAEQFAALS*DNYLK.E	gi|16130733|ref|NP_417306.1| fused PTS enzyme: PEP-protein phosphotransferase (enzyme I)/GAF domain containing protein [Escherichia coli str. K-12 substr. MG1655]
CKII_2.07238.07238.2.dta	3.4867	2	R.GEES*EQIELLNIR.K	gi|16131275|ref|NP_417857.1| predicted inner membrane protein [Escherichia coli str. K-12 substr. MG1655]
CKII_2.07243.07243.2.dta	3.3821	2	R.DSFLASLT*EAER.E	gi|16131119|ref|NP_417696.1| stringent starvation protein A [Escherichia coli str. K-12 substr. MG1655]
CKII_2.07266.07266.3.dta	4.165	3	K.AGLVDILGAS*GAENVQGEVQQK.L	gi|16132054|ref|NP_418653.1| fructose-1,6-bisphosphatase I [Escherichia coli str. K-12 substr. MG1655]
CKII_2.07354.07354.3.dta	3.312	3	R.IVM#S*DAERT*DDDLYDTVIGYR.G	gi|16128225|ref|NP_414774.1| hydrolase, binds to enzyme IIA(Glc) [Escherichia coli str. K-12 substr. MG1655]
CKII_2.07373.07373.2.dta	3.4539	2	R.FTGWYDVDLS*EK.G	gi|16128723|ref|NP_415276.1| phosphoglyceromutase 1 [Escherichia coli str. K-12 substr. MG1655]
CKII_2.07403.07403.2.dta	4.3417	2	K.VET*DFAAEVAAMSK.Q	gi|16128163|ref|NP_414712.1| protein chain elongation factor EF-Ts [Escherichia coli str. K-12 substr. MG1655]
CKII_2.07409.07409.2.dta	4.7376	2	K.M#QS*DEGEINPVDILR.W	gi|16131515|ref|NP_418101.1| conserved protein [Escherichia coli str. K-12 substr. MG1655]
CKII_2.07432.07432.2.dta	3.3393	2	K.LFT*DMCEGLPEK.R	gi|16128327|ref|NP_414876.1| thiogalactoside acetyltransferase [Escherichia coli str. K-12 substr. MG1655]
CKII_2.07459.07459.2.dta	3.212	2	K.GVFTFDPGFTS*TASCESK.I	gi|16128695|ref|NP_415248.1| citrate synthase [Escherichia coli str. K-12 substr. MG1655]
CKII_2.07491.07491.2.dta	4.6775	2	K.VET*DFAAEVAAMSK.Q	gi|16128163|ref|NP_414712.1| protein chain elongation factor EF-Ts [Escherichia coli str. K-12 substr. MG1655]
CKII_2.07520.07520.2.dta	3.253	2	R.GLAQGT*DVSFGSFGLK.A	gi|16131192|ref|NP_417772.1| 50S ribosomal subunit protein L16 [Escherichia coli str. K-12 substr. MG1655]
CKII_2.07522.07522.2.dta	3.63	2	R.LFDYLT*DTGNLPR.I	gi|16129855|ref|NP_416418.1| ferritin iron storage protein (cytoplasmic) [Escherichia coli str. K-12 substr. MG1655]
CKII_2.07552.07552.2.dta	3.3529	2	K.GVFTFDPGFTSTAS*CESK.I	gi|16128695|ref|NP_415248.1| citrate synthase [Escherichia coli str. K-12 substr. MG1655]
CKII_2.07579.07579.2.dta	3.1047	2	K.LAAS*DLGFALGPR.L	gi|16130794|ref|NP_417368.1| ssDNA exonuclease, 5' --> 3'-specific [Escherichia coli str. K-12 substr. MG1655]
CKII_2.07638.07638.2.dta	4.4529	2	K.LTLNGDT*AVELDVLK.G	gi|16128695|ref|NP_415248.1| citrate synthase [Escherichia coli str. K-12 substr. MG1655]
CKII_2.07667.07667.2.dta	3.959	2	R.M#LGADS*ALEIIAAGK.D	gi|16131692|ref|NP_418288.1| fused 3-hydroxybutyryl-CoA epimerase/delta(3)-cis-delta(2)-trans-enoyl-CoA isomerase/enoyl-CoA hydratase/3-hydroxyacyl-CoA dehydrogenase [Escherichia coli str. K-12 substr. MG1655]
CKII_2.07672.07672.2.dta	3.6454	2	K.VYES*QDDAVEAILGGK.V	gi|49176404|ref|YP_026248.1| dihydroxyacid dehydratase [Escherichia coli str. K-12 substr. MG1655]
CKII_2.07681.07681.2.dta	3.2096	2	R.ADYVSIT*DDEALEAFK.T	gi|16129222|ref|NP_415777.1| tryptophan synthase, beta subunit [Escherichia coli str. K-12 substr. MG1655]
CKII_2.07719.07719.2.dta	3.3716	2	K.LTLNGDT*AVELDVLK.G	gi|16128695|ref|NP_415248.1| citrate synthase [Escherichia coli str. K-12 substr. MG1655]
CKII_2.07866.07866.2.dta	5.5417	2	R.ANDT*DYGLAAGIVTADLNR.A	gi|16128297|ref|NP_414846.1| betaine aldehyde dehydrogenase, NAD-dependent [Escherichia coli str. K-12 substr. MG1655]
CKII_2.07872.07872.2.dta	3.8879	2	R.LDGEMS*EGELVDAFR.H	gi|16128889|ref|NP_415442.1| Involved in chromosome partioning, Ca2+ binding protein [Escherichia coli str. K-12 substr. MG1655]
CKII_2.07958.07958.2.dta	2.9484	2	K.SLSDTLEEVLS*SSGEK.S	gi|16130993|ref|NP_417569.1| conserved protein [Escherichia coli str. K-12 substr. MG1655]
CKII_2.07961.07961.2.dta	2.9002	2	R.LDGEMS*EGELVDAFR.H	gi|16128889|ref|NP_415442.1| Involved in chromosome partioning, Ca2+ binding protein [Escherichia coli str. K-12 substr. MG1655]
CKII_2.07964.07964.2.dta	3.5863	2	K.GDVAVFFGLS*GTGK.T	gi|16131280|ref|NP_417862.1| phosphoenolpyruvate carboxykinase [Escherichia coli str. K-12 substr. MG1655]
CKII_2.07994.07994.2.dta	3.5595	2	R.DSGVVS*ELFDER.N	gi|16129658|ref|NP_416217.1| phosphoenolpyruvate synthase [Escherichia coli str. K-12 substr. MG1655]
CKII_2.08049.08049.2.dta	2.8355	2	K.FGAIS*DWMEAR.D	gi|16128292|ref|NP_414841.1| predicted amino acid dehydrogenase with NAD(P)-binding domain and ferridoxin-like domain [Escherichia coli str. K-12 substr. MG1655]
CKII_2.08153.08153.2.dta	2.7842	2	R.TILVPIDIS*DSELTQR.V	gi|90111262|ref|NP_415894.4| stress-induced protein, ATP-binding protein [Escherichia coli str. K-12 substr. MG1655]
CKII_2.08298.08298.2.dta	3.5647	2	K.ALS*ELEQIVTR.L	gi|16128407|ref|NP_414956.1| exonuclease VII small subunit [Escherichia coli str. K-12 substr. MG1655]
CKII_2.08483.08483.2.dta	2.7881	2	R.LGLS*DAFLIK.E	gi|16128102|ref|NP_414651.1| quinolinate phosphoribosyltransferase [Escherichia coli str. K-12 substr. MG1655]
CKII_2.08597.08597.2.dta	3.0056	2	R.ELAAFSQFAS*DLDDATR.K	gi|16131602|ref|NP_418190.1| F1 sector of membrane-bound ATP synthase, alpha subunit [Escherichia coli str. K-12 substr. MG1655]
CKII_2.08640.08640.2.dta	2.8188	2	K.TEIIEES*EGEVAGIK.S	gi|16130793|ref|NP_417367.1| peptide chain release factor RF-2 [Escherichia coli str. K-12 substr. MG1655]
CKII_3.00607.00607.2.dta	2.8798	2	R.IVM#S*DAER.T	gi|16128225|ref|NP_414774.1| hydrolase, binds to enzyme IIA(Glc) [Escherichia coli str. K-12 substr. MG1655]
CKII_3.00678.00678.2.dta	2.7619	2	R.IVM#S*DAER.T	gi|16128225|ref|NP_414774.1| hydrolase, binds to enzyme IIA(Glc) [Escherichia coli str. K-12 substr. MG1655]
CKII_3.01188.01188.2.dta	3.1571	2	R.GGES*VNDQGAEDQR.Q	gi|16130513|ref|NP_417083.1| protein disaggregation chaperone [Escherichia coli str. K-12 substr. MG1655]
CKII_3.01230.01230.2.dta	3.0331	2	R.NNAS*PADPQVH.-	gi|90111586|ref|NP_417860.2| heat shock protein Hsp33 [Escherichia coli str. K-12 substr. MG1655]
CKII_3.01274.01274.2.dta	3.204	2	R.GGES*VNDQGAEDQR.Q	gi|16130513|ref|NP_417083.1| protein disaggregation chaperone [Escherichia coli str. K-12 substr. MG1655]
CKII_3.01331.01331.2.dta	3.0969	2	K.M#TSVGSQDTT*GPM#TR.D	gi|16128111|ref|NP_414660.1| bifunctional aconitate hydratase 2/2-methylisocitrate dehydratase [Escherichia coli str. K-12 substr. MG1655]
CKII_3.01422.01422.2.dta	4.2444	2	-.M#ET*TQTSTIASK.D	gi|16130703|ref|NP_417276.1| predicted serine transporter [Escherichia coli str. K-12 substr. MG1655]
CKII_3.01536.01536.2.dta	3.1611	2	R.GSEDTAYS*EDDQQQNR.Q	gi|90111418|ref|NP_416827.4| fused 5-methylaminomethyl-2-thiouridine-forming enzyme methyltransferase/FAD-dependent demodification enzyme [Escherichia coli str. K-12 substr. MG1655]
CKII_3.01568.01568.2.dta	2.8158	2	R.NES*AGEQLR.F	gi|16130254|ref|NP_416822.1| predicted semialdehyde dehydrogenase [Escherichia coli str. K-12 substr. MG1655]
CKII_3.01617.01617.2.dta	2.9176	2	R.IQAEKS*QQSSY.-	gi|16130603|ref|NP_417176.1| pleiotropic regulatory protein for carbon source metabolism [Escherichia coli str. K-12 substr. MG1655]
CKII_3.01676.01676.2.dta	3.2876	2	K.GQESEVT*GVK.I	gi|16131219|ref|NP_417799.1| protein chain elongation factor EF-G, GTP-binding [Escherichia coli str. K-12 substr. MG1655]
CKII_3.01764.01764.2.dta	3.7544	2	R.SMQEVAM#S*SQEASK.M	gi|16130839|ref|NP_417413.1| biosynthetic arginine decarboxylase, PLP-binding [Escherichia coli str. K-12 substr. MG1655]
CKII_3.01775.01775.2.dta	3.081	2	R.LAQQQAM#YES*QQER.V	gi|16131231|ref|NP_417811.1| fused predicted transporter subunits of ABC superfamily: ATP-binding components [Escherichia coli str. K-12 substr. MG1655]
CKII_3.01825.01825.2.dta	3.3863	2	R.S*ENADYQYNK.K	gi|90111587|ref|YP_026216.2| transcription elongation factor [Escherichia coli str. K-12 substr. MG1655]
CKII_3.01855.01855.2.dta	3.6739	2	R.VGDGTQDNLS*GCEK.A	gi|16131612|ref|NP_418200.1| asparagine synthetase A [Escherichia coli str. K-12 substr. MG1655]
CKII_3.02049.02049.2.dta	3.1282	2	K.GQES*EVTGVK.I	gi|16131219|ref|NP_417799.1| protein chain elongation factor EF-G, GTP-binding [Escherichia coli str. K-12 substr. MG1655]
CKII_3.02056.02056.2.dta	2.9864	2	K.AGGGS*ATLSM#GQAAAR.F	gi|16131126|ref|NP_417703.1| malate dehydrogenase, NAD(P)-binding [Escherichia coli str. K-12 substr. MG1655]
CKII_3.02192.02192.2.dta	3.0005	2	R.YFQS*DNAADK.L	gi|16130433|ref|NP_417003.1| IMP dehydrogenase [Escherichia coli str. K-12 substr. MG1655]
CKII_3.02365.02365.2.dta	3.6562	2	R.VINS*GQVCNCAER.V	gi|16129376|ref|NP_415933.1| aldehyde dehydrogenase A, NAD-linked [Escherichia coli str. K-12 substr. MG1655]
CKII_3.02416.02416.2.dta	2.9191	2	K.YES*DGGPGIAR.I	gi|16129466|ref|NP_416024.1| regulator with hipB [Escherichia coli str. K-12 substr. MG1655]
CKII_3.02655.02655.2.dta	2.8733	2	K.ETTTPSEQKAS*L.-	gi|16131765|ref|NP_418362.1| glycerol facilitator [Escherichia coli str. K-12 substr. MG1655]
CKII_3.02663.02663.2.dta	3.7308	2	K.VTGQALT*VNEK.G	gi|16128698|ref|NP_415251.1| succinate dehydrogenase, flavoprotein subunit [Escherichia coli str. K-12 substr. MG1655]
CKII_3.02673.02673.2.dta	2.8624	2	R.TM#NLGTVS*EER.R	gi|16132218|ref|NP_418818.1| DNA-binding response regulator in two-component regulatory system with ArcB or CpxA [Escherichia coli str. K-12 substr. MG1655]
CKII_3.02723.02723.2.dta	3.0365	2	K.AEEIVAS*NPEK.Y	gi|16130340|ref|NP_416909.1| cysteine synthase A, O-acetylserine sulfhydrolase A subunit [Escherichia coli str. K-12 substr. MG1655]
CKII_3.02736.02736.2.dta	2.6949	2	R.VMDS*NDLEK.E	gi|49176434|ref|YP_026274.1| GTP-binding protein [Escherichia coli str. K-12 substr. MG1655]
CKII_3.02849.02849.2.dta	3.3294	2	R.LSGYAGS*AGVAK.V	gi|16132206|ref|NP_418806.1| predicted repair protein [Escherichia coli str. K-12 substr. MG1655]
CKII_3.02899.02899.2.dta	4.1305	2	R.LAQQQAMYES*QQER.V	gi|16131231|ref|NP_417811.1| fused predicted transporter subunits of ABC superfamily: ATP-binding components [Escherichia coli str. K-12 substr. MG1655]
CKII_3.02983.02983.2.dta	2.9008	2	R.LFES*SGCAGK.L	gi|16130071|ref|NP_416637.1| D-lactate dehydrogenase, FAD-binding, NADH independent [Escherichia coli str. K-12 substr. MG1655]
CKII_3.03010.03010.2.dta	3.1527	2	K.LIDSQDVET*R.G	gi|16130687|ref|NP_417260.1| CTP synthetase [Escherichia coli str. K-12 substr. MG1655]
CKII_3.03028.03028.2.dta	3.8784	2	R.IQNAGT*EVVEAK.A	gi|16131126|ref|NP_417703.1| malate dehydrogenase, NAD(P)-binding [Escherichia coli str. K-12 substr. MG1655]
CKII_3.03146.03146.2.dta	3.0462	2	K.DLS*EAQVER.L	gi|16130796|ref|NP_417370.1| site-specific tyrosine recombinase [Escherichia coli str. K-12 substr. MG1655]
CKII_3.03168.03168.2.dta	3.1192	2	R.SADS*EYPYR.Q	gi|16130810|ref|NP_417384.1| proline aminopeptidase P II [Escherichia coli str. K-12 substr. MG1655]
CKII_3.03185.03185.2.dta	3.0094	2	R.QAFTVS*ESNKG.-	gi|16128712|ref|NP_415265.1| membrane spanning protein in TolA-TolQ-TolR complex [Escherichia coli str. K-12 substr. MG1655]
CKII_3.03279.03279.2.dta	3.8184	2	K.NNWGQT*EQQQEPSAAR.Q	gi|16131769|ref|NP_418366.1| molecular chaperone and ATPase component of HslUV protease [Escherichia coli str. K-12 substr. MG1655]
CKII_3.03291.03291.2.dta	2.7632	2	K.GATPAAS*DIQEAK.E	gi|16131937|ref|NP_418535.1| proline/glycine betaine transporter [Escherichia coli str. K-12 substr. MG1655]
CKII_3.03336.03336.2.dta	3.3662	2	R.NGYLT*AEQR.K	gi|16128126|ref|NP_414675.1| pantothenate synthetase [Escherichia coli str. K-12 substr. MG1655]
CKII_3.03446.03446.2.dta	3.952	2	R.YAVT*DAESAR.E	gi|16130176|ref|NP_416744.1| sn-glycerol-3-phosphate dehydrogenase (anaerobic), large subunit, FAD/NAD(P)-binding [Escherichia coli str. K-12 substr. MG1655]
CKII_3.03479.03479.2.dta	2.9452	2	R.FSTVQGGAGS*ADTVR.D	gi|49176140|ref|YP_025308.1| hydroperoxidase HPII(III) (catalase) [Escherichia coli str. K-12 substr. MG1655]
CKII_3.03491.03491.2.dta	3.3498	2	R.ASGIQT*GGPDSLSQR.D	gi|90111127|ref|NP_414921.2| conserved protein [Escherichia coli str. K-12 substr. MG1655]
CKII_3.03562.03562.2.dta	4.0435	2	R.LANELS*DAAENK.G	gi|16131220|ref|NP_417800.1| 30S ribosomal subunit protein S7 [Escherichia coli str. K-12 substr. MG1655]
CKII_3.03588.03588.2.dta	3.4545	2	R.NVNEDDS*VESYTGK.I	gi|16129806|ref|NP_416367.1| predicted DNA-binding transcriptional regulator [Escherichia coli str. K-12 substr. MG1655]
CKII_3.03604.03604.2.dta	3.7728	2	R.LDDT*SSEFNTQR.V	gi|16128698|ref|NP_415251.1| succinate dehydrogenase, flavoprotein subunit [Escherichia coli str. K-12 substr. MG1655]
CKII_3.03625.03625.2.dta	2.8162	2	K.ELAES*EGAIER.K	gi|16128002|ref|NP_414549.1| transaldolase B [Escherichia coli str. K-12 substr. MG1655]
CKII_3.03667.03667.2.dta	3.4011	2	R.FAQT*ADEIR.I	gi|90111427|ref|NP_416895.2| IS186/IS421 transposase [Escherichia coli str. K-12 substr. MG1655]
CKII_3.03699.03699.2.dta	2.942	2	R.IQGQS*DSPLTAK.G	gi|16132212|ref|NP_418812.1| phosphoglyceromutase 2, co-factor independent [Escherichia coli str. K-12 substr. MG1655]
CKII_3.03721.03721.2.dta	3.2466	2	R.LDDT*SSEFNTQR.V	gi|16128698|ref|NP_415251.1| succinate dehydrogenase, flavoprotein subunit [Escherichia coli str. K-12 substr. MG1655]
CKII_3.03729.03729.2.dta	2.7115	2	K.ALNVEEQS*VQET*EQEER.V	gi|16129047|ref|NP_415602.1| fused ribonucleaseE: endoribonuclease/RNA-binding protein/RNA degradosome binding protein [Escherichia coli str. K-12 substr. MG1655]
CKII_3.03755.03755.2.dta	2.7923	2	K.GAYAS*SGTCFSGNAAR.L	gi|16130783|ref|NP_417357.1| fused predicted xanthine/hypoxanthine oxidase: molybdopterin-binding subunit/Fe-S binding subunit [Escherichia coli str. K-12 substr. MG1655]
CKII_3.03851.03851.2.dta	2.8974	2	R.AGTLT*DSSLR.A	gi|16128195|ref|NP_414744.1| predicted DNA-binding transcriptional regulator [Escherichia coli str. K-12 substr. MG1655]
CKII_3.03861.03861.2.dta	3.6027	2	R.AVT*DSDEPPVVR.Y	gi|16131262|ref|NP_417843.1| tryptophanyl-tRNA synthetase [Escherichia coli str. K-12 substr. MG1655]
CKII_3.03937.03937.2.dta	3.1297	2	K.IDSLTAVS*R.Q	gi|16128178|ref|NP_414727.1| acetyl-CoA carboxylase, carboxytransferase, alpha subunit [Escherichia coli str. K-12 substr. MG1655]
CKII_3.03940.03940.2.dta	2.8865	2	R.EEES*AAAAEVEER.T	gi|16129198|ref|NP_415753.1| global DNA-binding transcriptional dual regulator H-NS [Escherichia coli str. K-12 substr. MG1655]
CKII_3.03951.03951.2.dta	4.1985	2	K.TTASTSTSVTLS*DAQAK.L	gi|16129034|ref|NP_415589.1| anti-sigma factor for FliA (sigma 28) [Escherichia coli str. K-12 substr. MG1655]
CKII_3.03960.03960.2.dta	4.2843	2	R.VNQS*DISDAQIK.K	gi|16130966|ref|NP_417542.1| predicted transcriptional regulator [Escherichia coli str. K-12 substr. MG1655]
CKII_3.03964.03964.2.dta	3.7565	2	K.VDSSGFQT*EPVAADGK.L	gi|16130437|ref|NP_417007.1| protein assembly complex, lipoprotein component [Escherichia coli str. K-12 substr. MG1655]
CKII_3.03992.03992.2.dta	3.4641	2	R.AVT*DSDEPPVVR.Y	gi|16131262|ref|NP_417843.1| tryptophanyl-tRNA synthetase [Escherichia coli str. K-12 substr. MG1655]
CKII_3.03996.03996.2.dta	3.4169	2	K.AIGAGELS*PR.D	gi|16130260|ref|NP_416828.1| predicted protein [Escherichia coli str. K-12 substr. MG1655]
CKII_3.04060.04060.2.dta	2.9313	2	K.EVAAQQVS*DQQLETAR.F	gi|16128650|ref|NP_415200.1| asparagine synthetase B [Escherichia coli str. K-12 substr. MG1655]
CKII_3.04100.04100.2.dta	5.3807	2	K.ALNVEEQSVQET*EQEER.V	gi|16129047|ref|NP_415602.1| fused ribonucleaseE: endoribonuclease/RNA-binding protein/RNA degradosome binding protein [Escherichia coli str. K-12 substr. MG1655]
CKII_3.04103.04103.2.dta	2.7984	2	K.TLT*NGCICCSR.S	gi|90111738|ref|NP_418772.4| predicted GTPase [Escherichia coli str. K-12 substr. MG1655]
CKII_3.04117.04117.2.dta	3.773	2	R.GGSAFTAGSEGTYS*ER.H	gi|16132130|ref|NP_418729.1| conserved protein [Escherichia coli str. K-12 substr. MG1655]
CKII_3.04121.04121.2.dta	2.9938	2	R.VSQAS*DSYYYR.A	gi|16130201|ref|NP_416769.1| conserved protein [Escherichia coli str. K-12 substr. MG1655]
CKII_3.04132.04132.2.dta	3.289	2	R.AVTDS*DEPPVVR.Y	gi|16131262|ref|NP_417843.1| tryptophanyl-tRNA synthetase [Escherichia coli str. K-12 substr. MG1655]
CKII_3.04150.04150.2.dta	2.8947	2	R.TLNLS*EEESR.F	gi|16132171|ref|NP_418770.1| endonuclease R [Escherichia coli str. K-12 substr. MG1655]
CKII_3.04151.04151.2.dta	2.839	2	R.EGVCGS*DGLNMNGK.N	gi|16128699|ref|NP_415252.1| succinate dehydrogenase, FeS subunit [Escherichia coli str. K-12 substr. MG1655]
CKII_3.04158.04158.2.dta	3.376	2	R.GET*VGQELAGNPK.V	gi|16129376|ref|NP_415933.1| aldehyde dehydrogenase A, NAD-linked [Escherichia coli str. K-12 substr. MG1655]
CKII_3.04193.04193.2.dta	2.9397	2	K.SVVNDT*DGIVR.V	gi|16130029|ref|NP_416594.1| galactitol-1-phosphate dehydrogenase, Zn-dependent and NAD(P)-binding [Escherichia coli str. K-12 substr. MG1655]
CKII_3.04202.04202.2.dta	3.1449	2	R.SVNVGFS*GGEK.K	gi|16129638|ref|NP_416197.1| component of SufBCD complex, ATP-binding component of ABC superfamily [Escherichia coli str. K-12 substr. MG1655]
CKII_3.04261.04261.2.dta	3.9622	2	K.IVYASNGTLS*DDDR.A	gi|16129046|ref|NP_415601.1| flagellar hook-filament junction protein [Escherichia coli str. K-12 substr. MG1655]
CKII_3.04271.04271.2.dta	3.7429	2	R.VEET*EDADAFR.V	gi|49176434|ref|YP_026274.1| GTP-binding protein [Escherichia coli str. K-12 substr. MG1655]
CKII_3.04282.04282.2.dta	3.0763	2	R.EGVCGS*DGLNMNGK.N	gi|16128699|ref|NP_415252.1| succinate dehydrogenase, FeS subunit [Escherichia coli str. K-12 substr. MG1655]
CKII_3.04292.04292.2.dta	3.3276	2	K.VGDIVVS*DEAR.Y	gi|16128152|ref|NP_414701.1| 5'-methylthioadenosine/S-adenosylhomocysteine nucleosidase [Escherichia coli str. K-12 substr. MG1655]
CKII_3.04307.04307.2.dta	2.6903	2	R.VGLIAGS*GGGSPR.F	gi|16130258|ref|NP_416826.1| 3-oxoacyl-[acyl-carrier-protein] synthase I [Escherichia coli str. K-12 substr. MG1655]
CKII_3.04311.04311.2.dta	3.269	2	R.TPNPGNT*MSEQLGDK.-	gi|16131068|ref|NP_417645.1| protease, ATP-dependent zinc-metallo [Escherichia coli str. K-12 substr. MG1655]
CKII_3.04325.04325.2.dta	3.5784	2	K.SVVNDT*DGIVR.V	gi|16130029|ref|NP_416594.1| galactitol-1-phosphate dehydrogenase, Zn-dependent and NAD(P)-binding [Escherichia coli str. K-12 substr. MG1655]
CKII_3.04328.04328.2.dta	2.9345	2	R.GQS*EDLGLR.Q	gi|16128437|ref|NP_414986.1| acyl-CoA thioesterase II [Escherichia coli str. K-12 substr. MG1655]
CKII_3.04359.04359.2.dta	3.0372	2	K.LGEVS*DTDIR.R	gi|16130987|ref|NP_417563.1| uronate isomerase [Escherichia coli str. K-12 substr. MG1655]
CKII_3.04393.04393.2.dta	4.5318	2	K.ALNVEEQS*VQETEQEER.V	gi|16129047|ref|NP_415602.1| fused ribonucleaseE: endoribonuclease/RNA-binding protein/RNA degradosome binding protein [Escherichia coli str. K-12 substr. MG1655]
CKII_3.04417.04417.2.dta	2.8553	2	R.VAVDS*EVTVR.G	gi|16128897|ref|NP_415450.1| asparaginyl tRNA synthetase [Escherichia coli str. K-12 substr. MG1655]
CKII_3.04422.04422.2.dta	3.6156	2	K.SAGGIVLT*GSAAAK.S	gi|16131967|ref|NP_418566.1| Cpn10 chaperonin GroES, small subunit of GroESL [Escherichia coli str. K-12 substr. MG1655]
CKII_3.04424.04424.2.dta	2.9051	2	R.VAVVDIQS*DK.A	gi|16130612|ref|NP_417185.1| sorbitol-6-phosphate dehydrogenase [Escherichia coli str. K-12 substr. MG1655]
CKII_3.04433.04433.2.dta	3.1276	2	K.AQFT*DAAIK.N	gi|16129614|ref|NP_416173.1| superoxide dismutase, Fe [Escherichia coli str. K-12 substr. MG1655]
CKII_3.04466.04466.2.dta	3.3331	2	R.TGFES*ADYPQGR.W	gi|16130952|ref|NP_417528.1| fused tRNA nucleotidyl transferase/2'3'-cyclic phosphodiesterase/2'nucleotidase and phosphatase [Escherichia coli str. K-12 substr. MG1655]
CKII_3.04493.04493.2.dta	3.5683	2	K.SVVNDT*DGIVR.V	gi|16130029|ref|NP_416594.1| galactitol-1-phosphate dehydrogenase, Zn-dependent and NAD(P)-binding [Escherichia coli str. K-12 substr. MG1655]
CKII_3.04501.04501.2.dta	3.5922	2	K.VQTEVAQLS*DDDPQAR.K	gi|16130922|ref|NP_417498.1| sensory histidine kinase in two-component regulatory system with QseB [Escherichia coli str. K-12 substr. MG1655]
CKII_3.04513.04513.2.dta	3.4877	2	K.VNDVAVKLS*.-	gi|16128058|ref|NP_414606.1| DNA-binding transcriptional dual regulator [Escherichia coli str. K-12 substr. MG1655]
CKII_3.04540.04540.2.dta	3.3381	2	R.SGALT*ESPVVR.E	gi|16129719|ref|NP_416279.1| predicted oxidoreductase [Escherichia coli str. K-12 substr. MG1655]
CKII_3.04570.04570.2.dta	3.5124	2	R.VLEQSAES*VPEYGK.A	gi|145698230|ref|NP_415193.2| predicted protein with nucleoside triphosphate hydrolase domain [Escherichia coli str. K-12 substr. MG1655]
CKII_3.04593.04593.2.dta	3.4185	2	R.ETQDSETLDT*ADALEQK.E	gi|16131092|ref|NP_417669.1| RNA polymerase, sigma 54 (sigma N) factor [Escherichia coli str. K-12 substr. MG1655]
CKII_3.04623.04623.2.dta	4.1945	2	K.SAGGIVLTGS*AAAK.S	gi|16131967|ref|NP_418566.1| Cpn10 chaperonin GroES, small subunit of GroESL [Escherichia coli str. K-12 substr. MG1655]
CKII_3.04624.04624.2.dta	2.7998	2	K.SVVNDT*DGIVR.V	gi|16130029|ref|NP_416594.1| galactitol-1-phosphate dehydrogenase, Zn-dependent and NAD(P)-binding [Escherichia coli str. K-12 substr. MG1655]
CKII_3.04627.04627.2.dta	3.007	2	K.NLM#S*DGNVQIVK.T	gi|16129622|ref|NP_416181.1| conserved protein [Escherichia coli str. K-12 substr. MG1655]
CKII_3.04635.04635.2.dta	2.7405	2	R.IASLS*DSVSNAR.E	gi|16128891|ref|NP_415444.1| fused chromosome partitioning protein: predicted nucleotide hydrolase/conserved protein/conserved protein [Escherichia coli str. K-12 substr. MG1655]
CKII_3.04656.04656.2.dta	3.1972	2	R.NGYNS*AALNGDM#NQALR.E	gi|90111550|ref|NP_417631.2| ATP-dependent RNA helicase [Escherichia coli str. K-12 substr. MG1655]
CKII_3.04667.04667.2.dta	2.9194	2	R.TMNLGTVS*EER.R	gi|16132218|ref|NP_418818.1| DNA-binding response regulator in two-component regulatory system with ArcB or CpxA [Escherichia coli str. K-12 substr. MG1655]
CKII_3.04690.04690.2.dta	3.6686	2	K.IDMQET*AGSLR.I	gi|90111719|ref|NP_418700.2| KpLE2 phage-like element; predicted oxidoreductase [Escherichia coli str. K-12 substr. MG1655]
CKII_3.04708.04708.2.dta	3.3503	2	K.EAGACGVS*DNAATFAEK.L	gi|16130643|ref|NP_417216.1| predicted dehydrogenase, with NAD(P)-binding Rossmann-fold domain [Escherichia coli str. K-12 substr. MG1655]
CKII_3.04728.04728.2.dta	2.7843	2	K.VM#S*DAFIK.A	gi|16129561|ref|NP_416120.1| pyridine nucleotide transhydrogenase, alpha subunit [Escherichia coli str. K-12 substr. MG1655]
CKII_3.04732.04732.2.dta	3.1761	2	K.IT*CVYDPENGENIAR.E	gi|90111719|ref|NP_418700.2| KpLE2 phage-like element; predicted oxidoreductase [Escherichia coli str. K-12 substr. MG1655]
CKII_3.04770.04770.2.dta	3.1007	2	K.SVVNDT*DGIVR.V	gi|16130029|ref|NP_416594.1| galactitol-1-phosphate dehydrogenase, Zn-dependent and NAD(P)-binding [Escherichia coli str. K-12 substr. MG1655]
CKII_3.04816.04816.2.dta	2.9244	2	K.GMSVT*EVER.W	gi|16131845|ref|NP_418443.1| homocysteine-N5-methyltetrahydrofolate transmethylase, B12-dependent [Escherichia coli str. K-12 substr. MG1655]
CKII_3.04819.04819.2.dta	2.8221	2	R.IFS*DAEGK.M	gi|16131727|ref|NP_418323.1| D-tyr-tRNA(Tyr) deacylase [Escherichia coli str. K-12 substr. MG1655]
CKII_3.04902.04902.2.dta	3.0115	2	K.SVVNDT*DGIVR.V	gi|16130029|ref|NP_416594.1| galactitol-1-phosphate dehydrogenase, Zn-dependent and NAD(P)-binding [Escherichia coli str. K-12 substr. MG1655]
CKII_3.04914.04914.2.dta	3.3673	2	R.LDM#LNEELS*DK.E	gi|16130513|ref|NP_417083.1| protein disaggregation chaperone [Escherichia coli str. K-12 substr. MG1655]
CKII_3.04941.04941.2.dta	4.0509	2	R.LSYDT*EASIAK.A	gi|16128002|ref|NP_414549.1| transaldolase B [Escherichia coli str. K-12 substr. MG1655]
CKII_3.05066.05066.2.dta	4.0886	2	K.NLM#S*DGNVQIVK.T	gi|16129622|ref|NP_416181.1| conserved protein [Escherichia coli str. K-12 substr. MG1655]
CKII_3.05071.05071.2.dta	3.0797	2	R.DPNQT*EFAQAVR.E	gi|16129715|ref|NP_416275.1| glutamate dehydrogenase, NADP-specific [Escherichia coli str. K-12 substr. MG1655]
CKII_3.05162.05162.2.dta	4.0054	2	K.NLM#S*DGNVQIVK.T	gi|16129622|ref|NP_416181.1| conserved protein [Escherichia coli str. K-12 substr. MG1655]
CKII_3.05168.05168.2.dta	3.168	2	K.ELGDQS*VVISGDTR.L	gi|90111113|ref|NP_414842.4| predicted transporter [Escherichia coli str. K-12 substr. MG1655]
CKII_3.05254.05254.2.dta	4.1351	2	K.NLM#S*DGNVQIVK.T	gi|16129622|ref|NP_416181.1| conserved protein [Escherichia coli str. K-12 substr. MG1655]
CKII_3.05283.05283.2.dta	3.0755	2	-.MNILHICVT*SK.W	gi|16131575|ref|NP_418163.1| tryptophanase leader peptide [Escherichia coli str. K-12 substr. MG1655]
CKII_3.05299.05299.2.dta	3.2074	2	R.LVIT*SDEGVR.A	gi|16131895|ref|NP_418493.1| acetyl-CoA synthetase [Escherichia coli str. K-12 substr. MG1655]
CKII_3.05306.05306.2.dta	2.715	2	R.EELDEFPAS*EK.E	gi|16130084|ref|NP_416651.1| Dihydropyrimidine dehydrogenase, NADH-dependent, subunit A [Escherichia coli str. K-12 substr. MG1655]
CKII_3.05321.05321.2.dta	2.7311	2	K.AGGIT*TLEDK.S	gi|16130986|ref|NP_417562.1| altronate hydrolase [Escherichia coli str. K-12 substr. MG1655]
CKII_3.05361.05361.2.dta	3.7666	2	K.NLM#S*DGNVQIVK.T	gi|16129622|ref|NP_416181.1| conserved protein [Escherichia coli str. K-12 substr. MG1655]
CKII_3.05558.05558.2.dta	2.9515	2	R.DVTAGAIQS*DINR.L	gi|16131778|ref|NP_418375.1| fused aspartokinase II/homoserine dehydrogenase II [Escherichia coli str. K-12 substr. MG1655]
CKII_3.05679.05679.2.dta	3.4305	2	-.M#LNQLDNLT*ER.V	gi|16131825|ref|NP_418423.1| stationary phase protein, binds sigma 70 RNA polymerase subunit [Escherichia coli str. K-12 substr. MG1655]
CKII_3.05695.05695.2.dta	3.2221	2	R.GST*DYFVNAR.K	gi|90111273|ref|NP_415952.2| predicted peptidase [Escherichia coli str. K-12 substr. MG1655]
CKII_3.05711.05711.2.dta	2.9522	2	R.IIAPEGS*DNAFQTSNPK.I	gi|16131103|ref|NP_417680.1| glutamate synthase, 4Fe-4S protein, small subunit [Escherichia coli str. K-12 substr. MG1655]
CKII_3.05723.05723.2.dta	3.9918	2	R.YFVTGT*DTEVGK.T	gi|16128746|ref|NP_415299.1| dethiobiotin synthetase [Escherichia coli str. K-12 substr. MG1655]
CKII_3.05731.05731.2.dta	3.0964	2	R.AIGEVT*DVVEK.E	gi|16130439|ref|NP_417009.1| histidyl tRNA synthetase [Escherichia coli str. K-12 substr. MG1655]
CKII_3.05780.05780.2.dta	3.1943	2	K.IASSGLCGS*DLPR.I	gi|16130029|ref|NP_416594.1| galactitol-1-phosphate dehydrogenase, Zn-dependent and NAD(P)-binding [Escherichia coli str. K-12 substr. MG1655]
CKII_3.05786.05786.2.dta	3.5629	2	K.GAVASLT*SVAK.L	gi|16128870|ref|NP_415423.1| pyruvate formate lyase I [Escherichia coli str. K-12 substr. MG1655]
CKII_3.05786.05786.2.dta	3.5629	2	K.GAVASLT*SVAK.L	gi|49176316|ref|YP_026205.1| pyruvate formate-lyase 4/2-ketobutyrate formate-lyase [Escherichia coli str. K-12 substr. MG1655]
CKII_3.05802.05802.2.dta	2.9905	2	R.FVS*QGELVR.D	gi|16128490|ref|NP_415039.1| DNA-binding transcriptional repressor [Escherichia coli str. K-12 substr. MG1655]
CKII_3.05803.05803.2.dta	2.9243	2	K.EGEVT*EGVFEK.Y	gi|49176276|ref|YP_026185.1| conserved protein [Escherichia coli str. K-12 substr. MG1655]
CKII_3.05832.05832.2.dta	2.6971	2	R.LEELGIS*ER.L	gi|90111113|ref|NP_414842.4| predicted transporter [Escherichia coli str. K-12 substr. MG1655]
CKII_3.05833.05833.2.dta	3.3158	2	R.ELGGNYYS*DPDVPPR.A	gi|90111217|ref|NP_415646.4| conserved protein [Escherichia coli str. K-12 substr. MG1655]
CKII_3.05861.05861.3.dta	3.9188	3	R.ENELEEAVM#S*DRDT*GAAAEPR.A	gi|16131060|ref|NP_417637.1| fused protein chain initiation factor 2, IF2: membrane protein/conserved protein [Escherichia coli str. K-12 substr. MG1655]
CKII_3.05875.05875.2.dta	3.5317	2	R.APLDNDIGVS*EATR.I	gi|16128329|ref|NP_414878.1| beta-D-galactosidase [Escherichia coli str. K-12 substr. MG1655]
CKII_3.05896.05896.2.dta	3.2622	2	R.LPNPTLAVT*DGK.T	gi|90111352|ref|NP_416389.4| predicted metal-binding enzyme [Escherichia coli str. K-12 substr. MG1655]
CKII_3.05933.05933.2.dta	2.7871	2	R.GLT*EALTR.V	gi|16130033|ref|NP_416598.1| D-tagatose 1,6-bisphosphate aldolase 2, subunit [Escherichia coli str. K-12 substr. MG1655]
CKII_3.05991.05991.2.dta	3.6361	2	R.ENELEEAVM#S*DR.D	gi|16131060|ref|NP_417637.1| fused protein chain initiation factor 2, IF2: membrane protein/conserved protein [Escherichia coli str. K-12 substr. MG1655]
CKII_3.06003.06003.2.dta	3.4226	2	K.ALLEVSGNVT*DK.T	gi|16128102|ref|NP_414651.1| quinolinate phosphoribosyltransferase [Escherichia coli str. K-12 substr. MG1655]
CKII_3.06086.06086.2.dta	2.9339	2	-.MIISAAS*DYR.A	gi|16131476|ref|NP_418062.1| L-lactate dehydrogenase, FMN-linked [Escherichia coli str. K-12 substr. MG1655]
CKII_3.06095.06095.2.dta	3.0572	2	R.YQVDINNLT*QR.E	gi|16130658|ref|NP_417231.1| sulfate adenylyltransferase, subunit 1 [Escherichia coli str. K-12 substr. MG1655]
CKII_3.06122.06122.2.dta	3.2887	2	R.ENELEEAVM#S*DR.D	gi|16131060|ref|NP_417637.1| fused protein chain initiation factor 2, IF2: membrane protein/conserved protein [Escherichia coli str. K-12 substr. MG1655]
CKII_3.06123.06123.2.dta	3.6581	2	R.ALLENTELS*AR.E	gi|16131770|ref|NP_418367.1| peptidase component of the HslUV protease [Escherichia coli str. K-12 substr. MG1655]
CKII_3.06129.06129.2.dta	3	2	R.ANGYS*ELEISQK.R	gi|16129823|ref|NP_416384.1| predicted methyltransferase [Escherichia coli str. K-12 substr. MG1655]
CKII_3.06167.06167.2.dta	3.7593	2	R.VWNITEGS*DDER.I	gi|16130909|ref|NP_417484.1| alcohol dehydrogenase, NAD(P)-dependent [Escherichia coli str. K-12 substr. MG1655]
CKII_3.06169.06169.2.dta	4.0681	2	K.VAGITQDFT*DGTTTNTGR.G	gi|16129039|ref|NP_415594.1| flagellar hook protein [Escherichia coli str. K-12 substr. MG1655]
CKII_3.06189.06189.2.dta	2.9522	2	K.DDDTADILT*AASR.D	gi|16128780|ref|NP_415333.1| Fe-binding and storage protein [Escherichia coli str. K-12 substr. MG1655]
CKII_3.06197.06197.2.dta	3.6261	2	K.VETDFAAEVAAM#S*K.Q	gi|16128163|ref|NP_414712.1| protein chain elongation factor EF-Ts [Escherichia coli str. K-12 substr. MG1655]
CKII_3.06234.06234.2.dta	3.6005	2	R.EAAIVTDIAGT*TR.D	gi|16131574|ref|NP_418162.1| GTPase [Escherichia coli str. K-12 substr. MG1655]
CKII_3.06235.06235.2.dta	3.8489	2	R.AGIAINGS*APADIR.V	gi|16129619|ref|NP_416178.1| cyclopropane fatty acyl phospholipid synthase (unsaturated-phospholipid methyltransferase) [Escherichia coli str. K-12 substr. MG1655]
CKII_3.06252.06252.2.dta	2.869	2	R.ENELEEAVM#S*DR.D	gi|16131060|ref|NP_417637.1| fused protein chain initiation factor 2, IF2: membrane protein/conserved protein [Escherichia coli str. K-12 substr. MG1655]
CKII_3.06263.06263.2.dta	3.9159	2	R.VETGS*GIGFGATVK.A	gi|16128423|ref|NP_414972.1| ATPase and specificity subunit of ClpX-ClpP ATP-dependent serine protease [Escherichia coli str. K-12 substr. MG1655]
CKII_3.06279.06279.2.dta	2.7966	2	K.ACIS*GQGDMPFK.A	gi|16131713|ref|NP_418309.1| predicted sugar phosphate isomerase [Escherichia coli str. K-12 substr. MG1655]
CKII_3.06292.06292.2.dta	2.9122	2	R.TPAWLS*EGR.L	gi|16130176|ref|NP_416744.1| sn-glycerol-3-phosphate dehydrogenase (anaerobic), large subunit, FAD/NAD(P)-binding [Escherichia coli str. K-12 substr. MG1655]
CKII_3.06350.06350.2.dta	3.4212	2	R.TLWVS*DDAEEQR.I	gi|16128579|ref|NP_415128.1| 2,3-dihydro-2,3-dihydroxybenzoate dehydrogenase [Escherichia coli str. K-12 substr. MG1655]
CKII_3.06369.06369.2.dta	3.376	2	R.TLWVS*DDAEEQR.I	gi|16128579|ref|NP_415128.1| 2,3-dihydro-2,3-dihydroxybenzoate dehydrogenase [Escherichia coli str. K-12 substr. MG1655]
CKII_3.06395.06395.2.dta	3.0571	2	K.AYGS*TNPINVVR.A	gi|16131182|ref|NP_417762.1| 30S ribosomal subunit protein S5 [Escherichia coli str. K-12 substr. MG1655]
CKII_3.06421.06421.2.dta	3.6801	2	K.VEQAFELT*DASAER.S	gi|16128111|ref|NP_414660.1| bifunctional aconitate hydratase 2/2-methylisocitrate dehydratase [Escherichia coli str. K-12 substr. MG1655]
CKII_3.06443.06443.2.dta	3.3835	2	R.ELGGNYYS*DPDVPPR.A	gi|90111217|ref|NP_415646.4| conserved protein [Escherichia coli str. K-12 substr. MG1655]
CKII_3.06468.06468.2.dta	3.7975	2	K.YADVGS*FDYGR.N	gi|16128896|ref|NP_415449.1| outer membrane porin 1a (Ia;b;F) [Escherichia coli str. K-12 substr. MG1655]
CKII_3.06469.06469.2.dta	3.3329	2	R.ENELEEAVM#S*DR.D	gi|16131060|ref|NP_417637.1| fused protein chain initiation factor 2, IF2: membrane protein/conserved protein [Escherichia coli str. K-12 substr. MG1655]
CKII_3.06473.06473.2.dta	3.6605	2	R.LPQVEGT*GGDVQPSQDLVR.V	gi|16130513|ref|NP_417083.1| protein disaggregation chaperone [Escherichia coli str. K-12 substr. MG1655]
CKII_3.06476.06476.2.dta	3.2081	2	R.LPQVEGT*GGDVQPSQDLVR.V	gi|16130513|ref|NP_417083.1| protein disaggregation chaperone [Escherichia coli str. K-12 substr. MG1655]
CKII_3.06488.06488.2.dta	2.8138	2	R.QIINAIDNM#T*DIEQEK.V	gi|145698294|ref|NP_416898.2| predicted DNA-binding transcriptional regulator [Escherichia coli str. K-12 substr. MG1655]
CKII_3.06494.06494.2.dta	2.7929	2	K.IDQLSS*DVQTLNAK.V	gi|16129633|ref|NP_416192.1| murein lipoprotein [Escherichia coli str. K-12 substr. MG1655]
CKII_3.06514.06514.2.dta	2.9446	2	K.YTIDLT*ER.A	gi|16130513|ref|NP_417083.1| protein disaggregation chaperone [Escherichia coli str. K-12 substr. MG1655]
CKII_3.06524.06524.2.dta	3.2646	2	R.ALADGAT*DYLER.L	gi|16130640|ref|NP_417213.1| methyl-directed mismatch repair protein [Escherichia coli str. K-12 substr. MG1655]
CKII_3.06556.06556.2.dta	2.9388	2	R.AYELYLS*EKQ.-	gi|16129476|ref|NP_416034.1| putative autoinducer-2 (AI-2) aldolase [Escherichia coli str. K-12 substr. MG1655]
CKII_3.06558.06558.2.dta	3.3516	2	R.YCLGVTNPDS*GIAEK.Q	gi|90111585|ref|NP_417858.4| predicted hydrolase [Escherichia coli str. K-12 substr. MG1655]
CKII_3.06585.06585.2.dta	2.8307	2	R.IIQICGGLS*DR.E	gi|16130494|ref|NP_417064.1| GTP-binding membrane protein [Escherichia coli str. K-12 substr. MG1655]
CKII_3.06588.06588.2.dta	4.1518	2	R.ENELEEAVM#S*DR.D	gi|16131060|ref|NP_417637.1| fused protein chain initiation factor 2, IF2: membrane protein/conserved protein [Escherichia coli str. K-12 substr. MG1655]
CKII_3.06597.06597.2.dta	3.6583	2	R.LPQVEGT*GGDVQPSQDLVR.V	gi|16130513|ref|NP_417083.1| protein disaggregation chaperone [Escherichia coli str. K-12 substr. MG1655]
CKII_3.06605.06605.2.dta	2.9872	2	K.NLM#S*DGNVQIVK.T	gi|16129622|ref|NP_416181.1| conserved protein [Escherichia coli str. K-12 substr. MG1655]
CKII_3.06651.06651.2.dta	3.04	2	R.TAIS*DLEVENR.E	gi|16132080|ref|NP_418679.1| valyl-tRNA synthetase [Escherichia coli str. K-12 substr. MG1655]
CKII_3.06684.06684.2.dta	3.0526	2	R.GVCSGLS*DALER.F	gi|16128984|ref|NP_415539.1| conserved protein with nucleoside triphosphate hydrolase domain [Escherichia coli str. K-12 substr. MG1655]
CKII_3.06706.06706.2.dta	3.5626	2	R.IIQICGGLS*DR.E	gi|16130494|ref|NP_417064.1| GTP-binding membrane protein [Escherichia coli str. K-12 substr. MG1655]
CKII_3.06721.06721.2.dta	3.1683	2	K.TAVGQTIQIGS*GITK.G	gi|16128088|ref|NP_414637.1| GTP-binding tubulin-like cell division protein [Escherichia coli str. K-12 substr. MG1655]
CKII_3.06757.06757.2.dta	2.8496	2	K.ACQVACS*EWNDIR.D	gi|16129434|ref|NP_415992.1| formate dehydrogenase-N, Fe-S (beta) subunit, nitrate-inducible [Escherichia coli str. K-12 substr. MG1655]
CKII_3.06757.06757.2.dta	2.8496	2	K.ACQVACS*EWNDIR.D	gi|16131733|ref|NP_418329.1| formate dehydrogenase-O, Fe-S subunit [Escherichia coli str. K-12 substr. MG1655]
CKII_3.06772.06772.2.dta	3.2396	2	R.EAAIVT*DIAGTTR.D	gi|16131574|ref|NP_418162.1| GTPase [Escherichia coli str. K-12 substr. MG1655]
CKII_3.06778.06778.2.dta	3.1367	2	R.LPAAQSFAALS*GM#EEGGK.L	gi|16129070|ref|NP_415625.1| beta N-acetyl-glucosaminidase [Escherichia coli str. K-12 substr. MG1655]
CKII_3.06779.06779.2.dta	3.4513	2	R.ENELEEAVMS*DR.D	gi|16131060|ref|NP_417637.1| fused protein chain initiation factor 2, IF2: membrane protein/conserved protein [Escherichia coli str. K-12 substr. MG1655]
CKII_3.06797.06797.2.dta	4.1441	2	K.TEIIEES*EGEVAGIK.S	gi|16130793|ref|NP_417367.1| peptide chain release factor RF-2 [Escherichia coli str. K-12 substr. MG1655]
CKII_3.06837.06837.2.dta	3.7179	2	K.ALLETTSQDT*EDDWSR.L	gi|16129125|ref|NP_415680.1| predicted DNA-binding transcriptional regulator [Escherichia coli str. K-12 substr. MG1655]
CKII_3.06859.06859.2.dta	3.0787	2	R.TNLS*DLDQYR.Y	gi|16130986|ref|NP_417562.1| altronate hydrolase [Escherichia coli str. K-12 substr. MG1655]
CKII_3.06915.06915.2.dta	3.0215	2	K.NLMS*DGNVQIVK.T	gi|16129622|ref|NP_416181.1| conserved protein [Escherichia coli str. K-12 substr. MG1655]
CKII_3.06919.06919.2.dta	3.8828	2	R.NGYNS*AALNGDMNQALR.E	gi|90111550|ref|NP_417631.2| ATP-dependent RNA helicase [Escherichia coli str. K-12 substr. MG1655]
CKII_3.06920.06920.2.dta	3.1138	2	R.DALLENVT*VR.E	gi|16131280|ref|NP_417862.1| phosphoenolpyruvate carboxykinase [Escherichia coli str. K-12 substr. MG1655]
CKII_3.06936.06936.2.dta	3.6993	2	R.ENELEEAVM#S*DR.D	gi|16131060|ref|NP_417637.1| fused protein chain initiation factor 2, IF2: membrane protein/conserved protein [Escherichia coli str. K-12 substr. MG1655]
CKII_3.06939.06939.3.dta	3.4748	3	R.ENELEEAVMS*DRDT*GAAAEPR.A	gi|16131060|ref|NP_417637.1| fused protein chain initiation factor 2, IF2: membrane protein/conserved protein [Escherichia coli str. K-12 substr. MG1655]
CKII_3.06982.06982.2.dta	2.7838	2	K.VANLGS*LGDQVNVK.A	gi|16132025|ref|NP_418624.1| 50S ribosomal subunit protein L9 [Escherichia coli str. K-12 substr. MG1655]
CKII_3.07016.07016.2.dta	3.8567	2	K.YLGGEELT*EAEIK.G	gi|16131219|ref|NP_417799.1| protein chain elongation factor EF-G, GTP-binding [Escherichia coli str. K-12 substr. MG1655]
CKII_3.07024.07024.2.dta	2.8764	2	R.ELGGNYYS*DPDVPPR.A	gi|90111217|ref|NP_415646.4| conserved protein [Escherichia coli str. K-12 substr. MG1655]
CKII_3.07041.07041.2.dta	4.0422	2	R.TLQQAVQSGEYS*DYQEYAK.L	gi|16131102|ref|NP_417679.1| glutamate synthase, large subunit [Escherichia coli str. K-12 substr. MG1655]
CKII_3.07046.07046.2.dta	2.737	2	R.VAES*VIPEIK.H	gi|16130029|ref|NP_416594.1| galactitol-1-phosphate dehydrogenase, Zn-dependent and NAD(P)-binding [Escherichia coli str. K-12 substr. MG1655]
CKII_3.07058.07058.2.dta	3.071	2	R.EGWLGCQQIAGS*R.-	gi|16130191|ref|NP_416759.1| conserved protein [Escherichia coli str. K-12 substr. MG1655]
CKII_3.07060.07060.2.dta	3.8081	2	R.ENELEEAVM#S*DR.D	gi|16131060|ref|NP_417637.1| fused protein chain initiation factor 2, IF2: membrane protein/conserved protein [Escherichia coli str. K-12 substr. MG1655]
CKII_3.07061.07061.2.dta	3.018	2	R.ENELEEAVMS*DR.D	gi|16131060|ref|NP_417637.1| fused protein chain initiation factor 2, IF2: membrane protein/conserved protein [Escherichia coli str. K-12 substr. MG1655]
CKII_3.07064.07064.2.dta	2.9311	2	R.DSAASIVAQGNFYGT*DR.S	gi|16131388|ref|NP_417973.1| DNA-binding transcriptional dual regulator [Escherichia coli str. K-12 substr. MG1655]
CKII_3.07100.07100.2.dta	3.671	2	K.VIEFS*DDSIEAR.Q	gi|16128659|ref|NP_415209.1| DNA-binding transcriptional dual regulator of siderophore biosynthesis and transport [Escherichia coli str. K-12 substr. MG1655]
CKII_3.07121.07121.2.dta	3.0681	2	R.IAVTNLRT*PDEI.-	gi|16130222|ref|NP_416790.1| NADH:ubiquinone oxidoreductase, chain B [Escherichia coli str. K-12 substr. MG1655]
CKII_3.07123.07123.2.dta	3.358	2	K.NLMS*DGNVQIVK.T	gi|16129622|ref|NP_416181.1| conserved protein [Escherichia coli str. K-12 substr. MG1655]
CKII_3.07126.07126.2.dta	4.002	2	R.YIAGVGAEYT*DAPALQR.I	gi|16131535|ref|NP_418121.1| cryptic adenine deaminase [Escherichia coli str. K-12 substr. MG1655]
CKII_3.07137.07137.2.dta	2.7983	2	R.LDEFET*VGNTIR.A	gi|16128088|ref|NP_414637.1| GTP-binding tubulin-like cell division protein [Escherichia coli str. K-12 substr. MG1655]
CKII_3.07140.07140.2.dta	3.3122	2	R.LFSYT*DTQISR.L	gi|49176140|ref|YP_025308.1| hydroperoxidase HPII(III) (catalase) [Escherichia coli str. K-12 substr. MG1655]
CKII_3.07143.07143.2.dta	2.6798	2	R.ELGGNYYS*DPDVPPR.A	gi|90111217|ref|NP_415646.4| conserved protein [Escherichia coli str. K-12 substr. MG1655]
CKII_3.07169.07169.2.dta	3.22	2	R.ENELEEAVMS*DR.D	gi|16131060|ref|NP_417637.1| fused protein chain initiation factor 2, IF2: membrane protein/conserved protein [Escherichia coli str. K-12 substr. MG1655]
CKII_3.07187.07187.2.dta	2.9998	2	R.YLT*EQGFQVR.S	gi|16131282|ref|NP_417864.1| DNA-binding response regulator in two-component regulatory system with EnvZ [Escherichia coli str. K-12 substr. MG1655]
CKII_3.07188.07188.2.dta	3.1226	2	K.GLENLS*GDLYEK.I	gi|16128899|ref|NP_415452.1| aminopeptidase N [Escherichia coli str. K-12 substr. MG1655]
CKII_3.07190.07190.2.dta	4.0552	2	R.AVAGVNIEEFS*R.S	gi|16130726|ref|NP_417299.1| exonuclease V (RecBCD complex), gamma chain [Escherichia coli str. K-12 substr. MG1655]
CKII_3.07204.07204.2.dta	3.298	2	K.TLQEQYPNDT*DLLGR.A	gi|16131302|ref|NP_417886.1| glycogen phosphorylase [Escherichia coli str. K-12 substr. MG1655]
CKII_3.07242.07242.2.dta	3.5584	2	R.LDMLNEELS*DK.E	gi|16130513|ref|NP_417083.1| protein disaggregation chaperone [Escherichia coli str. K-12 substr. MG1655]
CKII_3.07263.07263.2.dta	2.7958	2	R.ENELEEAVMS*DR.D	gi|16131060|ref|NP_417637.1| fused protein chain initiation factor 2, IF2: membrane protein/conserved protein [Escherichia coli str. K-12 substr. MG1655]
CKII_3.07274.07274.2.dta	3.7301	2	K.NLMS*DGNVQIVK.T	gi|16129622|ref|NP_416181.1| conserved protein [Escherichia coli str. K-12 substr. MG1655]
CKII_3.07287.07287.2.dta	3.2814	2	K.VNEDLGLLS*EEK.A	gi|16129569|ref|NP_416128.1| fumarate hydratase (fumarase C),aerobic Class II [Escherichia coli str. K-12 substr. MG1655]
CKII_3.07295.07295.2.dta	3.2899	2	K.GALS*AVVADSR.G	gi|16131815|ref|NP_418412.1| 50S ribosomal subunit protein L10 [Escherichia coli str. K-12 substr. MG1655]
CKII_3.07307.07307.2.dta	3.1856	2	R.ENELEEAVM#S*DR.D	gi|16131060|ref|NP_417637.1| fused protein chain initiation factor 2, IF2: membrane protein/conserved protein [Escherichia coli str. K-12 substr. MG1655]
CKII_3.07329.07329.2.dta	3.6648	2	K.NLM#S*DGNVQIVK.T	gi|16129622|ref|NP_416181.1| conserved protein [Escherichia coli str. K-12 substr. MG1655]
CKII_3.07349.07349.2.dta	3.7015	2	R.ENELEEAVMS*DR.D	gi|16131060|ref|NP_417637.1| fused protein chain initiation factor 2, IF2: membrane protein/conserved protein [Escherichia coli str. K-12 substr. MG1655]
CKII_3.07381.07381.2.dta	3.6103	2	K.NLMS*DGNVQIVK.T	gi|16129622|ref|NP_416181.1| conserved protein [Escherichia coli str. K-12 substr. MG1655]
CKII_3.07397.07397.2.dta	3.7962	2	K.LINDAYDS*EYFATK.V	gi|16131764|ref|NP_418361.1| glycerol kinase [Escherichia coli str. K-12 substr. MG1655]
CKII_3.07414.07414.2.dta	3.8668	2	R.ENELEEAVM#S*DR.D	gi|16131060|ref|NP_417637.1| fused protein chain initiation factor 2, IF2: membrane protein/conserved protein [Escherichia coli str. K-12 substr. MG1655]
CKII_3.07417.07417.2.dta	3.1559	2	R.ALSIVTS*DSPVYR.E	gi|16129662|ref|NP_416221.1| conserved protein [Escherichia coli str. K-12 substr. MG1655]
CKII_3.07422.07422.2.dta	3.5684	2	R.NVEDLS*EVALR.Q	gi|16131476|ref|NP_418062.1| L-lactate dehydrogenase, FMN-linked [Escherichia coli str. K-12 substr. MG1655]
CKII_3.07434.07434.2.dta	3.3351	2	R.FDGNACVLLNNNS*EQPIGTR.I	gi|16131189|ref|NP_417769.1| 50S ribosomal subunit protein L14 [Escherichia coli str. K-12 substr. MG1655]
CKII_3.07443.07443.2.dta	3.9568	2	R.YPVTAVGS*VAEDNLR.E	gi|16130611|ref|NP_417184.1| glucitol/sorbitol-specific enzyme IIA component of PTS [Escherichia coli str. K-12 substr. MG1655]
CKII_3.07451.07451.2.dta	4.3296	2	R.YPVTAVGS*VAEDNLR.E	gi|16130611|ref|NP_417184.1| glucitol/sorbitol-specific enzyme IIA component of PTS [Escherichia coli str. K-12 substr. MG1655]
CKII_3.07457.07457.2.dta	3.6088	2	R.ENELEEAVMS*DR.D	gi|16131060|ref|NP_417637.1| fused protein chain initiation factor 2, IF2: membrane protein/conserved protein [Escherichia coli str. K-12 substr. MG1655]
CKII_3.07462.07462.2.dta	2.7675	2	R.FGLLT*DK.M	gi|90111281|ref|NP_415996.2| malate dehydrogenase, (decarboxylating, NAD-requiring) (malic enzyme) [Escherichia coli str. K-12 substr. MG1655]
CKII_3.07488.07488.2.dta	2.9608	2	R.ADQIQWS*AGIEPGDPR.Y	gi|16131841|ref|NP_418439.1| isocitrate lyase [Escherichia coli str. K-12 substr. MG1655]
CKII_3.07489.07489.2.dta	4.4307	2	K.LNSAAIS*DYAPNGLQVEGK.E	gi|16128685|ref|NP_415238.1| conserved metal-binding protein [Escherichia coli str. K-12 substr. MG1655]
CKII_3.07498.07498.2.dta	2.9411	2	K.NLMS*DGNVQIVK.T	gi|16129622|ref|NP_416181.1| conserved protein [Escherichia coli str. K-12 substr. MG1655]
CKII_3.07503.07503.2.dta	4.3153	2	K.IWEEGS*DEVLVK.A	gi|16128969|ref|NP_415523.1| predicted protein [Escherichia coli str. K-12 substr. MG1655]
CKII_3.07521.07521.2.dta	2.8009	2	K.TIASFQQQLS*DM#GYK.F	gi|16131841|ref|NP_418439.1| isocitrate lyase [Escherichia coli str. K-12 substr. MG1655]
CKII_3.07531.07531.2.dta	3.4976	2	K.NLMS*DGNVQIVK.T	gi|16129622|ref|NP_416181.1| conserved protein [Escherichia coli str. K-12 substr. MG1655]
CKII_3.07536.07536.2.dta	2.9612	2	R.ENELEEAVM#S*DR.D	gi|16131060|ref|NP_417637.1| fused protein chain initiation factor 2, IF2: membrane protein/conserved protein [Escherichia coli str. K-12 substr. MG1655]
CKII_3.07542.07542.2.dta	3.6907	2	K.SFLESLGS*DQAK.D	gi|16128457|ref|NP_415006.1| molecular chaperone HSP90 family [Escherichia coli str. K-12 substr. MG1655]
CKII_3.07546.07546.2.dta	3.8362	2	K.AANAGGVAT*SGLEMAQNAAR.L	gi|16129715|ref|NP_416275.1| glutamate dehydrogenase, NADP-specific [Escherichia coli str. K-12 substr. MG1655]
CKII_3.07553.07553.2.dta	3.1979	2	R.VFFCNS*GAEANEAALK.L	gi|16129702|ref|NP_416262.1| succinylornithine transaminase, PLP-dependent [Escherichia coli str. K-12 substr. MG1655]
CKII_3.07572.07572.2.dta	3.9085	2	R.ENELEEAVMS*DR.D	gi|16131060|ref|NP_417637.1| fused protein chain initiation factor 2, IF2: membrane protein/conserved protein [Escherichia coli str. K-12 substr. MG1655]
CKII_3.07603.07603.2.dta	2.9325	2	K.IWEEGS*DEVLVK.A	gi|16128969|ref|NP_415523.1| predicted protein [Escherichia coli str. K-12 substr. MG1655]
CKII_3.07640.07640.2.dta	3.5651	2	K.SFLESLGS*DQAK.D	gi|16128457|ref|NP_415006.1| molecular chaperone HSP90 family [Escherichia coli str. K-12 substr. MG1655]
CKII_3.07671.07671.2.dta	3.1212	2	R.ENELEEAVMS*DR.D	gi|16131060|ref|NP_417637.1| fused protein chain initiation factor 2, IF2: membrane protein/conserved protein [Escherichia coli str. K-12 substr. MG1655]
CKII_3.07744.07744.2.dta	3.1537	2	K.GITEFIEQDT*EEAR.Q	gi|16131845|ref|NP_418443.1| homocysteine-N5-methyltetrahydrofolate transmethylase, B12-dependent [Escherichia coli str. K-12 substr. MG1655]
CKII_3.07765.07765.2.dta	3.6356	2	R.ENELEEAVMS*DR.D	gi|16131060|ref|NP_417637.1| fused protein chain initiation factor 2, IF2: membrane protein/conserved protein [Escherichia coli str. K-12 substr. MG1655]
CKII_3.07787.07787.2.dta	3.7736	2	K.NLSNFASLGS*ECTVDR.E	gi|90111557|ref|NP_417676.2| isoprenoid biosynthesis protein with amidotransferase-like domain [Escherichia coli str. K-12 substr. MG1655]
CKII_3.07794.07794.2.dta	4.277	2	R.GIQLQVS*DAELAAR.R	gi|49176404|ref|YP_026248.1| dihydroxyacid dehydratase [Escherichia coli str. K-12 substr. MG1655]
CKII_3.07863.07863.2.dta	3.1084	2	R.ENELEEAVMS*DR.D	gi|16131060|ref|NP_417637.1| fused protein chain initiation factor 2, IF2: membrane protein/conserved protein [Escherichia coli str. K-12 substr. MG1655]
CKII_3.07864.07864.2.dta	2.7946	2	K.EFADNLDS*DFK.V	gi|16131193|ref|NP_417773.1| 30S ribosomal subunit protein S3 [Escherichia coli str. K-12 substr. MG1655]
CKII_3.07978.07978.2.dta	3.1422	2	K.NVPFES*GIDSVGSAR.L	gi|49176207|ref|NP_416791.3| NADH:ubiquinone oxidoreductase, membrane subunit A [Escherichia coli str. K-12 substr. MG1655]
CKII_3.07984.07984.2.dta	3.5312	2	R.ENELEEAVMS*DR.D	gi|16131060|ref|NP_417637.1| fused protein chain initiation factor 2, IF2: membrane protein/conserved protein [Escherichia coli str. K-12 substr. MG1655]
CKII_3.07996.07996.2.dta	4.0696	2	K.NDIGWYS*LDEGDNQQER.F	gi|16131294|ref|NP_417877.1| fused conserved protein: DNA-binding transcriptional activator/maltotriose-ATP-binding protein [Escherichia coli str. K-12 substr. MG1655]
CKII_3.08033.08033.2.dta	3.7192	2	K.VETDFAAEVAAMS*K.Q	gi|16128163|ref|NP_414712.1| protein chain elongation factor EF-Ts [Escherichia coli str. K-12 substr. MG1655]
CKII_3.08039.08039.2.dta	2.8993	2	R.QGNALGWAT*AGGSGFR.G	gi|16131176|ref|NP_417756.1| 30S ribosomal subunit protein S11 [Escherichia coli str. K-12 substr. MG1655]
CKII_3.08070.08070.3.dta	3.6942	3	R.AAVLCFAAESVAT*DCQR.E	gi|16130033|ref|NP_416598.1| D-tagatose 1,6-bisphosphate aldolase 2, subunit [Escherichia coli str. K-12 substr. MG1655]
CKII_3.08076.08076.2.dta	3.3874	2	R.GVDISQVFS*AK.D	gi|16130591|ref|NP_417163.1| glycine betaine transporter subunit [Escherichia coli str. K-12 substr. MG1655]
CKII_3.08103.08103.2.dta	3.9934	2	R.ENELEEAVMS*DR.D	gi|16131060|ref|NP_417637.1| fused protein chain initiation factor 2, IF2: membrane protein/conserved protein [Escherichia coli str. K-12 substr. MG1655]
CKII_3.08104.08104.2.dta	3.0556	2	R.AIDENCFFS*DEVPDR.W	gi|90111334|ref|NP_416308.4| predicted diguanylate cyclase [Escherichia coli str. K-12 substr. MG1655]
CKII_3.08112.08112.2.dta	3.2325	2	K.VLGFIT*DAGGR.T	gi|16130342|ref|NP_416911.1| PEP-protein phosphotransferase of PTS system (enzyme I) [Escherichia coli str. K-12 substr. MG1655]
CKII_3.08123.08123.2.dta	4.1331	2	R.YNWAYET*EPEPFM#NNR.R	gi|16128296|ref|NP_414845.1| choline dehydrogenase, a flavoprotein [Escherichia coli str. K-12 substr. MG1655]
CKII_3.08126.08126.2.dta	4.8921	2	R.TGNTDSLALQNIGLET*DSR.G	gi|90111670|ref|NP_418397.2| pyridine nucleotide transhydrogenase, soluble [Escherichia coli str. K-12 substr. MG1655]
CKII_3.08127.08127.2.dta	3.2499	2	K.QEDANFS*NNAMAEAFK.A	gi|16128878|ref|NP_415431.1| 30S ribosomal subunit protein S1 [Escherichia coli str. K-12 substr. MG1655]
CKII_3.08149.08149.2.dta	3.0298	2	K.EVAEAWEVLS*DEQR.R	gi|16128966|ref|NP_415520.1| curved DNA-binding protein, DnaJ homologue that functions as a co-chaperone of DnaK [Escherichia coli str. K-12 substr. MG1655]
CKII_3.08160.08160.2.dta	3.0478	2	K.ALANFM#FDS*DEAM#VR.I	gi|16130513|ref|NP_417083.1| protein disaggregation chaperone [Escherichia coli str. K-12 substr. MG1655]
CKII_3.08168.08168.2.dta	2.9658	2	K.FGAIS*DWM#EAR.D	gi|16128292|ref|NP_414841.1| predicted amino acid dehydrogenase with NAD(P)-binding domain and ferridoxin-like domain [Escherichia coli str. K-12 substr. MG1655]
CKII_3.08179.08179.3.dta	3.0189	3	R.AAVLCFAAESVAT*DCQR.E	gi|16130033|ref|NP_416598.1| D-tagatose 1,6-bisphosphate aldolase 2, subunit [Escherichia coli str. K-12 substr. MG1655]
CKII_3.08194.08194.2.dta	4.1093	2	R.ENELEEAVMS*DR.D	gi|16131060|ref|NP_417637.1| fused protein chain initiation factor 2, IF2: membrane protein/conserved protein [Escherichia coli str. K-12 substr. MG1655]
CKII_3.08196.08196.2.dta	3.6128	2	R.GFEYS*DCWVDDAR.L	gi|16131300|ref|NP_417884.1| sn-glycerol-3-phosphate dehydrogenase, aerobic, FAD/NAD(P)-binding [Escherichia coli str. K-12 substr. MG1655]
CKII_3.08259.08259.2.dta	3.2869	2	R.QIINAIDNMT*DIEQEK.V	gi|145698294|ref|NP_416898.2| predicted DNA-binding transcriptional regulator [Escherichia coli str. K-12 substr. MG1655]
CKII_3.08299.08299.2.dta	3.5203	2	R.AQLLDS*DGLLR.Q	gi|16130279|ref|NP_416848.1| predicted lipoprotein [Escherichia coli str. K-12 substr. MG1655]
CKII_3.08301.08301.2.dta	3.3197	2	R.ENELEEAVMS*DR.D	gi|16131060|ref|NP_417637.1| fused protein chain initiation factor 2, IF2: membrane protein/conserved protein [Escherichia coli str. K-12 substr. MG1655]
CKII_3.08343.08343.2.dta	3.6625	2	K.NLLDTAVLEGT*DEESAR.S	gi|16132064|ref|NP_418663.1| magnesium transporter [Escherichia coli str. K-12 substr. MG1655]
CKII_3.08377.08377.2.dta	2.7201	2	R.LQLTPILM#ERGS*A.-	gi|16131621|ref|NP_418209.1| DNA-binding transcriptional repressor of ribose metabolism [Escherichia coli str. K-12 substr. MG1655]
CKII_3.08378.08378.2.dta	2.886	2	R.VT*DEDLVVEIPR.Y	gi|16130450|ref|NP_417020.1| [2Fe-2S] ferredoxin [Escherichia coli str. K-12 substr. MG1655]
CKII_3.08384.08384.2.dta	3.0281	2	R.LPAAQSFAALS*GMEEGGK.L	gi|16129070|ref|NP_415625.1| beta N-acetyl-glucosaminidase [Escherichia coli str. K-12 substr. MG1655]
CKII_3.08444.08444.2.dta	2.9908	2	K.FFS*DIGGR.A	gi|16128768|ref|NP_415321.1| predicted transferase/phosphorylase [Escherichia coli str. K-12 substr. MG1655]
CKII_3.08462.08462.2.dta	4.4726	2	R.GFKT*EIIEES*EGEVAGIK.S	gi|16130793|ref|NP_417367.1| peptide chain release factor RF-2 [Escherichia coli str. K-12 substr. MG1655]
CKII_3.08472.08472.2.dta	2.9606	2	R.ENELEEAVMS*DR.D	gi|16131060|ref|NP_417637.1| fused protein chain initiation factor 2, IF2: membrane protein/conserved protein [Escherichia coli str. K-12 substr. MG1655]
CKII_3.08508.08508.2.dta	3.5252	2	R.ENELEEAVMS*DR.D	gi|16131060|ref|NP_417637.1| fused protein chain initiation factor 2, IF2: membrane protein/conserved protein [Escherichia coli str. K-12 substr. MG1655]
CKII_3.08529.08529.2.dta	4.0182	2	K.TNVAFS*DFTPTEYSTK.G	gi|90111286|ref|NP_416015.2| conserved protein [Escherichia coli str. K-12 substr. MG1655]
CKII_3.08584.08584.2.dta	2.9065	2	R.SEVLRS*FLDD.-	gi|16130963|ref|NP_417539.1| RNA polymerase, sigma 70 (sigma D) factor [Escherichia coli str. K-12 substr. MG1655]
CKII_3.08598.08598.2.dta	2.7487	2	R.GALAT*GMENSLQSAVR.D	gi|145698325|ref|NP_418007.3| biotin sulfoxide reductase [Escherichia coli str. K-12 substr. MG1655]
CKII_3.08603.08603.2.dta	3.3159	2	R.ENELEEAVMS*DR.D	gi|16131060|ref|NP_417637.1| fused protein chain initiation factor 2, IF2: membrane protein/conserved protein [Escherichia coli str. K-12 substr. MG1655]
CKII_3.08613.08613.2.dta	2.7114	2	R.GEFYQQLT*NDLETAR.A	gi|16131488|ref|NP_418074.1| glycine C-acetyltransferase [Escherichia coli str. K-12 substr. MG1655]
CKII_3.08624.08624.2.dta	2.9221	2	R.GSFES*FAQAVR.D	gi|16130029|ref|NP_416594.1| galactitol-1-phosphate dehydrogenase, Zn-dependent and NAD(P)-binding [Escherichia coli str. K-12 substr. MG1655]
CKII_3.08636.08636.2.dta	3.3519	2	K.ADGINPEELLGNSS*AAAPR.A	gi|16130583|ref|NP_417155.1| DNA binding protein, nucleoid-associated [Escherichia coli str. K-12 substr. MG1655]
CKII_3.08639.08639.2.dta	2.8001	2	K.LAT*AWEGFTK.G	gi|16128870|ref|NP_415423.1| pyruvate formate lyase I [Escherichia coli str. K-12 substr. MG1655]
CKII_3.08678.08678.2.dta	4.4595	2	K.GTVLNS*DISSVISR.L	gi|90111647|ref|NP_418204.2| predicted cytoplasmic sugar-binding protein [Escherichia coli str. K-12 substr. MG1655]
CKII_3.08699.08699.2.dta	3.7461	2	R.ENELEEAVMS*DR.D	gi|16131060|ref|NP_417637.1| fused protein chain initiation factor 2, IF2: membrane protein/conserved protein [Escherichia coli str. K-12 substr. MG1655]
CKII_3.08721.08721.2.dta	4.0744	2	R.FLSELT*AAEGLER.Y	gi|16128701|ref|NP_415254.1| 2-oxoglutarate decarboxylase, thiamin-requiring [Escherichia coli str. K-12 substr. MG1655]
CKII_3.08745.08745.2.dta	3.5512	2	R.LDILIAT*DVAAR.G	gi|90111550|ref|NP_417631.2| ATP-dependent RNA helicase [Escherichia coli str. K-12 substr. MG1655]
CKII_3.08747.08747.2.dta	3.6669	2	K.VETDFAAEVAAMSKQS*.-	gi|16128163|ref|NP_414712.1| protein chain elongation factor EF-Ts [Escherichia coli str. K-12 substr. MG1655]
CKII_3.08753.08753.2.dta	3.4672	2	K.VETDFAAEVAAMSKQS*.-	gi|16128163|ref|NP_414712.1| protein chain elongation factor EF-Ts [Escherichia coli str. K-12 substr. MG1655]
CKII_3.08796.08796.2.dta	2.8281	2	K.IDQQYDVFS*DIR.G	gi|16131238|ref|NP_417818.1| bifunctional acetylornithine aminotransferase/ succinyldiaminopimelate aminotransferase [Escherichia coli str. K-12 substr. MG1655]
CKII_3.08807.08807.2.dta	3.0852	2	R.ENELEEAVMS*DR.D	gi|16131060|ref|NP_417637.1| fused protein chain initiation factor 2, IF2: membrane protein/conserved protein [Escherichia coli str. K-12 substr. MG1655]
CKII_3.08839.08839.2.dta	3.4442	2	R.ASLAT*DIQGLR.D	gi|16129046|ref|NP_415601.1| flagellar hook-filament junction protein [Escherichia coli str. K-12 substr. MG1655]
CKII_3.08841.08841.2.dta	2.9077	2	R.VGFFNPIAS*EK.E	gi|16130530|ref|NP_417100.1| 30S ribosomal subunit protein S16 [Escherichia coli str. K-12 substr. MG1655]
CKII_3.08847.08847.2.dta	2.6832	2	R.LPQLGIEFS*GPGAK.E	gi|16131119|ref|NP_417696.1| stringent starvation protein A [Escherichia coli str. K-12 substr. MG1655]
CKII_3.08850.08850.2.dta	4.0549	2	R.YNWAYET*EPEPFMNNR.R	gi|16128296|ref|NP_414845.1| choline dehydrogenase, a flavoprotein [Escherichia coli str. K-12 substr. MG1655]
CKII_3.08915.08915.2.dta	3.7493	2	R.DSFLASLT*EAER.E	gi|16131119|ref|NP_417696.1| stringent starvation protein A [Escherichia coli str. K-12 substr. MG1655]
CKII_3.08918.08918.2.dta	2.9997	2	R.ENELEEAVMS*DR.D	gi|16131060|ref|NP_417637.1| fused protein chain initiation factor 2, IF2: membrane protein/conserved protein [Escherichia coli str. K-12 substr. MG1655]
CKII_3.08939.08939.2.dta	3.2604	2	R.SGLAALFS*SRE.-	gi|16130723|ref|NP_417296.1| exonuclease V (RecBCD complex), alpha chain [Escherichia coli str. K-12 substr. MG1655]
CKII_3.08979.08979.2.dta	3.7168	2	K.LYDGAWS*EWGAR.A	gi|90111451|ref|NP_417016.4| 3-mercaptopyruvate sulfurtransferase [Escherichia coli str. K-12 substr. MG1655]
CKII_3.08991.08991.2.dta	3.4078	2	R.YSGWNS*ELGQQILK.G	gi|16131436|ref|NP_418022.1| D-xylose isomerase [Escherichia coli str. K-12 substr. MG1655]
CKII_3.08994.08994.2.dta	4.7397	2	K.IIHLT*DDSFDT*DVLK.A	gi|67005950|ref|NP_418228.2| thioredoxin 1 [Escherichia coli str. K-12 substr. MG1655]
CKII_3.09005.09005.2.dta	3.3358	2	K.GTVLNS*DISSVISR.L	gi|90111647|ref|NP_418204.2| predicted cytoplasmic sugar-binding protein [Escherichia coli str. K-12 substr. MG1655]
CKII_3.09022.09022.2.dta	3.4995	2	R.TGFNDS*LLDIR.Y	gi|16130033|ref|NP_416598.1| D-tagatose 1,6-bisphosphate aldolase 2, subunit [Escherichia coli str. K-12 substr. MG1655]
CKII_3.09024.09024.2.dta	3.4674	2	R.ENELEEAVMS*DR.D	gi|16131060|ref|NP_417637.1| fused protein chain initiation factor 2, IF2: membrane protein/conserved protein [Escherichia coli str. K-12 substr. MG1655]
CKII_3.09032.09032.3.dta	4.0019	3	R.IVM#S*DAERT*DDDLYDTVIGYR.G	gi|16128225|ref|NP_414774.1| hydrolase, binds to enzyme IIA(Glc) [Escherichia coli str. K-12 substr. MG1655]
CKII_3.09099.09099.2.dta	3.8623	2	K.IGNPEYFT*DIEFR.K	gi|16128464|ref|NP_415013.1| bifunctional UDP-sugar hydrolase/5'-nucleotidase [Escherichia coli str. K-12 substr. MG1655]
CKII_3.09103.09103.2.dta	4.3244	2	K.VET*DFAAEVAAMSK.Q	gi|16128163|ref|NP_414712.1| protein chain elongation factor EF-Ts [Escherichia coli str. K-12 substr. MG1655]
CKII_3.09111.09111.2.dta	3.2094	2	R.WLELGLT*DEEK.Q	gi|16131817|ref|NP_418414.1| RNA polymerase, beta subunit [Escherichia coli str. K-12 substr. MG1655]
CKII_3.09119.09119.2.dta	3.4825	2	R.LFDYLT*DTGNLPR.I	gi|16129855|ref|NP_416418.1| ferritin iron storage protein (cytoplasmic) [Escherichia coli str. K-12 substr. MG1655]
CKII_3.09123.09123.2.dta	2.9353	2	K.LFT*DMCEGLPEK.R	gi|16128327|ref|NP_414876.1| thiogalactoside acetyltransferase [Escherichia coli str. K-12 substr. MG1655]
CKII_3.09129.09129.2.dta	3.6816	2	R.ENELEEAVMS*DR.D	gi|16131060|ref|NP_417637.1| fused protein chain initiation factor 2, IF2: membrane protein/conserved protein [Escherichia coli str. K-12 substr. MG1655]
CKII_3.09133.09133.2.dta	3.3321	2	K.AYDT*GWGGVVFK.T	gi|90111398|ref|NP_416652.4| Dihydropyrimidine dehydrogenase, NADH-dependent, subunit B [Escherichia coli str. K-12 substr. MG1655]
CKII_3.09178.09178.2.dta	3.6706	2	R.GLAQGT*DVSFGSFGLK.A	gi|16131192|ref|NP_417772.1| 50S ribosomal subunit protein L16 [Escherichia coli str. K-12 substr. MG1655]
CKII_3.09196.09196.2.dta	4.1827	2	K.AGVNGLFT*DFPDK.A	gi|16130174|ref|NP_416742.1| periplasmic glycerophosphodiester phosphodiesterase [Escherichia coli str. K-12 substr. MG1655]
CKII_3.09199.09199.2.dta	2.9816	2	R.LQLTPILMERGS*A.-	gi|16131621|ref|NP_418209.1| DNA-binding transcriptional repressor of ribose metabolism [Escherichia coli str. K-12 substr. MG1655]
CKII_3.09203.09203.2.dta	3.9406	2	R.LADAEFFFNT*DR.K	gi|16131430|ref|NP_418016.1| glycine tRNA synthetase, beta subunit [Escherichia coli str. K-12 substr. MG1655]
CKII_3.09221.09221.2.dta	2.7568	2	R.NFDLS*PLYR.S	gi|16131555|ref|NP_418142.1| heat shock chaperone [Escherichia coli str. K-12 substr. MG1655]
CKII_3.09229.09229.2.dta	3.3479	2	R.ENELEEAVMS*DR.D	gi|16131060|ref|NP_417637.1| fused protein chain initiation factor 2, IF2: membrane protein/conserved protein [Escherichia coli str. K-12 substr. MG1655]
CKII_3.09274.09274.2.dta	3.8503	2	K.AGVNGLFT*DFPDK.A	gi|16130174|ref|NP_416742.1| periplasmic glycerophosphodiester phosphodiesterase [Escherichia coli str. K-12 substr. MG1655]
CKII_3.09314.09314.2.dta	2.9515	2	R.ENELEEAVMS*DR.D	gi|16131060|ref|NP_417637.1| fused protein chain initiation factor 2, IF2: membrane protein/conserved protein [Escherichia coli str. K-12 substr. MG1655]
CKII_3.09397.09397.2.dta	3.8431	2	R.ENELEEAVMS*DR.D	gi|16131060|ref|NP_417637.1| fused protein chain initiation factor 2, IF2: membrane protein/conserved protein [Escherichia coli str. K-12 substr. MG1655]
CKII_3.09442.09442.2.dta	3.5046	2	K.AGGNYLSSLLVGS*EAR.R	gi|49176403|ref|YP_026247.1| branched-chain amino-acid aminotransferase [Escherichia coli str. K-12 substr. MG1655]
CKII_3.09475.09475.2.dta	3.9011	2	R.TVGVVAALLS*DTQR.D	gi|16131845|ref|NP_418443.1| homocysteine-N5-methyltetrahydrofolate transmethylase, B12-dependent [Escherichia coli str. K-12 substr. MG1655]
CKII_3.09480.09480.2.dta	2.8865	2	R.ENELEEAVMS*DR.D	gi|16131060|ref|NP_417637.1| fused protein chain initiation factor 2, IF2: membrane protein/conserved protein [Escherichia coli str. K-12 substr. MG1655]
CKII_3.09486.09486.2.dta	3.5848	2	R.LDGEMS*EGELVDAFR.H	gi|16128889|ref|NP_415442.1| Involved in chromosome partioning, Ca2+ binding protein [Escherichia coli str. K-12 substr. MG1655]
CKII_3.09532.09532.2.dta	3.5078	2	K.NLALLLDS*VANDK.A	gi|16128223|ref|NP_414772.1| aminoacyl-histidine dipeptidase (peptidase D) [Escherichia coli str. K-12 substr. MG1655]
CKII_3.09558.09558.2.dta	3.2451	2	R.ENELEEAVMS*DR.D	gi|16131060|ref|NP_417637.1| fused protein chain initiation factor 2, IF2: membrane protein/conserved protein [Escherichia coli str. K-12 substr. MG1655]
CKII_3.09634.09634.2.dta	3.2912	2	R.ENELEEAVMS*DR.D	gi|16131060|ref|NP_417637.1| fused protein chain initiation factor 2, IF2: membrane protein/conserved protein [Escherichia coli str. K-12 substr. MG1655]
CKII_3.09648.09648.2.dta	2.9855	2	K.FGAIS*DWMEAR.D	gi|16128292|ref|NP_414841.1| predicted amino acid dehydrogenase with NAD(P)-binding domain and ferridoxin-like domain [Escherichia coli str. K-12 substr. MG1655]
CKII_3.09651.09651.2.dta	3.5297	2	R.LYELEKLWS*.-	gi|90111157|ref|NP_415170.4| predicted protein [Escherichia coli str. K-12 substr. MG1655]
CKII_3.09684.09684.2.dta	2.6869	2	R.YTLAGT*EVSALLGR.M	gi|16131600|ref|NP_418188.1| F1 sector of membrane-bound ATP synthase, beta subunit [Escherichia coli str. K-12 substr. MG1655]
CKII_3.09705.09705.2.dta	4.0924	2	R.ENELEEAVMS*DR.D	gi|16131060|ref|NP_417637.1| fused protein chain initiation factor 2, IF2: membrane protein/conserved protein [Escherichia coli str. K-12 substr. MG1655]
CKII_3.09769.09769.2.dta	3.0283	2	R.ENELEEAVMS*DR.D	gi|16131060|ref|NP_417637.1| fused protein chain initiation factor 2, IF2: membrane protein/conserved protein [Escherichia coli str. K-12 substr. MG1655]
CKII_3.09837.09837.2.dta	3.3868	2	R.ENELEEAVMS*DR.D	gi|16131060|ref|NP_417637.1| fused protein chain initiation factor 2, IF2: membrane protein/conserved protein [Escherichia coli str. K-12 substr. MG1655]
CKII_3.09899.09899.2.dta	3.3554	2	R.ENELEEAVMS*DR.D	gi|16131060|ref|NP_417637.1| fused protein chain initiation factor 2, IF2: membrane protein/conserved protein [Escherichia coli str. K-12 substr. MG1655]
CKII_3.09921.09921.2.dta	2.9229	2	R.ENELEEAVMS*DR.D	gi|16131060|ref|NP_417637.1| fused protein chain initiation factor 2, IF2: membrane protein/conserved protein [Escherichia coli str. K-12 substr. MG1655]
CKII_3.09951.09951.2.dta	3.6827	2	R.ENELEEAVMS*DR.D	gi|16131060|ref|NP_417637.1| fused protein chain initiation factor 2, IF2: membrane protein/conserved protein [Escherichia coli str. K-12 substr. MG1655]
CKII_3.10004.10004.2.dta	3.072	2	R.ENELEEAVMS*DR.D	gi|16131060|ref|NP_417637.1| fused protein chain initiation factor 2, IF2: membrane protein/conserved protein [Escherichia coli str. K-12 substr. MG1655]
CKII_3.10055.10055.2.dta	3.3945	2	R.ENELEEAVMS*DR.D	gi|16131060|ref|NP_417637.1| fused protein chain initiation factor 2, IF2: membrane protein/conserved protein [Escherichia coli str. K-12 substr. MG1655]
CKII_3.10121.10121.2.dta	3.6145	2	R.ENELEEAVMS*DR.D	gi|16131060|ref|NP_417637.1| fused protein chain initiation factor 2, IF2: membrane protein/conserved protein [Escherichia coli str. K-12 substr. MG1655]
CKII_3.10126.10126.2.dta	4.1572	2	R.VNYDIFQLT*SFDEK.L	gi|16128705|ref|NP_415258.1| DNA-binding transcriptional dual regulator, fatty-acyl-binding [Escherichia coli str. K-12 substr. MG1655]
CKII_3.10188.10188.2.dta	2.7447	2	R.ENELEEAVM#S*DR.D	gi|16131060|ref|NP_417637.1| fused protein chain initiation factor 2, IF2: membrane protein/conserved protein [Escherichia coli str. K-12 substr. MG1655]
CKII_3.10201.10201.2.dta	3.6842	2	R.ENELEEAVMS*DR.D	gi|16131060|ref|NP_417637.1| fused protein chain initiation factor 2, IF2: membrane protein/conserved protein [Escherichia coli str. K-12 substr. MG1655]
CKII_3.10316.10316.2.dta	3.1307	2	R.ENELEEAVMS*DR.D	gi|16131060|ref|NP_417637.1| fused protein chain initiation factor 2, IF2: membrane protein/conserved protein [Escherichia coli str. K-12 substr. MG1655]
CKII_4.00358.00358.2.dta	3.0522	2	K.VVNDNAPQT*AK.E	gi|16128088|ref|NP_414637.1| GTP-binding tubulin-like cell division protein [Escherichia coli str. K-12 substr. MG1655]
CKII_4.00438.00438.2.dta	3.0323	2	K.VVNDNAPQT*AK.E	gi|16128088|ref|NP_414637.1| GTP-binding tubulin-like cell division protein [Escherichia coli str. K-12 substr. MG1655]
CKII_4.00504.00504.2.dta	2.7029	2	K.VVNDNAPQT*AK.E	gi|16128088|ref|NP_414637.1| GTP-binding tubulin-like cell division protein [Escherichia coli str. K-12 substr. MG1655]
CKII_4.00969.00969.2.dta	2.8509	2	K.CAVVGGNES*R.-	gi|157783149|ref|NP_414872.3| DNA-binding transcriptional dual regulator [Escherichia coli str. K-12 substr. MG1655]
CKII_4.01745.01745.2.dta	2.804	2	K.GQESEVT*GVK.I	gi|16131219|ref|NP_417799.1| protein chain elongation factor EF-G, GTP-binding [Escherichia coli str. K-12 substr. MG1655]
CKII_4.01764.01764.2.dta	3.0733	2	R.AAQAWS*DGK.L	gi|16130275|ref|NP_416844.1| beta-ketoacyl-CoA thiolase, anaerobic, subunit [Escherichia coli str. K-12 substr. MG1655]
CKII_4.02069.02069.2.dta	2.6613	2	R.VNAALES*CR.D	gi|16132212|ref|NP_418812.1| phosphoglyceromutase 2, co-factor independent [Escherichia coli str. K-12 substr. MG1655]
CKII_4.02148.02148.2.dta	3.4553	2	R.VNAALES*CR.D	gi|16132212|ref|NP_418812.1| phosphoglyceromutase 2, co-factor independent [Escherichia coli str. K-12 substr. MG1655]
CKII_4.02589.02589.2.dta	2.9636	2	K.M#TSVGSQDT*TGPMTR.D	gi|16128111|ref|NP_414660.1| bifunctional aconitate hydratase 2/2-methylisocitrate dehydratase [Escherichia coli str. K-12 substr. MG1655]
CKII_4.02952.02952.2.dta	3.1923	2	K.FTNT*SGFANK.T	gi|16128896|ref|NP_415449.1| outer membrane porin 1a (Ia;b;F) [Escherichia coli str. K-12 substr. MG1655]
CKII_4.03197.03197.2.dta	3.3485	2	R.NGYLT*AEQR.K	gi|16128126|ref|NP_414675.1| pantothenate synthetase [Escherichia coli str. K-12 substr. MG1655]
CKII_4.03201.03201.2.dta	3.7477	2	K.NNWGQT*EQQQEPSAAR.Q	gi|16131769|ref|NP_418366.1| molecular chaperone and ATPase component of HslUV protease [Escherichia coli str. K-12 substr. MG1655]
CKII_4.03315.03315.2.dta	2.9696	2	K.GNGENSYGGNGDMT*YAR.L	gi|16128896|ref|NP_415449.1| outer membrane porin 1a (Ia;b;F) [Escherichia coli str. K-12 substr. MG1655]
CKII_4.03483.03483.2.dta	3.4979	2	K.ALNVEEQS*VQET*EQEER.V	gi|16129047|ref|NP_415602.1| fused ribonucleaseE: endoribonuclease/RNA-binding protein/RNA degradosome binding protein [Escherichia coli str. K-12 substr. MG1655]
CKII_4.03487.03487.2.dta	3.0015	2	R.LDDT*SSEFNTQR.V	gi|16128698|ref|NP_415251.1| succinate dehydrogenase, flavoprotein subunit [Escherichia coli str. K-12 substr. MG1655]
CKII_4.03803.03803.2.dta	4.3455	2	K.ALNVEEQSVQET*EQEER.V	gi|16129047|ref|NP_415602.1| fused ribonucleaseE: endoribonuclease/RNA-binding protein/RNA degradosome binding protein [Escherichia coli str. K-12 substr. MG1655]
CKII_4.03869.03869.2.dta	2.9066	2	R.YCVNS*ASLR.F	gi|16129732|ref|NP_416292.1| methionine sulfoxide reductase B [Escherichia coli str. K-12 substr. MG1655]
CKII_4.04015.04015.2.dta	2.6867	2	R.EGVCGS*DGLNMNGK.N	gi|16128699|ref|NP_415252.1| succinate dehydrogenase, FeS subunit [Escherichia coli str. K-12 substr. MG1655]
CKII_4.04040.04040.2.dta	2.8156	2	K.SVVNDT*DGIVR.V	gi|16130029|ref|NP_416594.1| galactitol-1-phosphate dehydrogenase, Zn-dependent and NAD(P)-binding [Escherichia coli str. K-12 substr. MG1655]
CKII_4.04133.04133.2.dta	3.0855	2	K.ALNVEEQS*VQETEQEER.V	gi|16129047|ref|NP_415602.1| fused ribonucleaseE: endoribonuclease/RNA-binding protein/RNA degradosome binding protein [Escherichia coli str. K-12 substr. MG1655]
CKII_4.04159.04159.2.dta	3.2706	2	K.INVCGSANRIS*A.-	gi|16131029|ref|NP_417606.1| tagatose 6-phosphate aldolase 1, kbaY subunit [Escherichia coli str. K-12 substr. MG1655]
CKII_4.04225.04225.2.dta	3.7253	2	K.SVVNDT*DGIVR.V	gi|16130029|ref|NP_416594.1| galactitol-1-phosphate dehydrogenase, Zn-dependent and NAD(P)-binding [Escherichia coli str. K-12 substr. MG1655]
CKII_4.04345.04345.2.dta	2.7001	2	R.IAVT*NLR.T	gi|16130222|ref|NP_416790.1| NADH:ubiquinone oxidoreductase, chain B [Escherichia coli str. K-12 substr. MG1655]
CKII_4.04646.04646.2.dta	3.3829	2	R.IAISERPALNS*.-	gi|90111637|ref|NP_418141.2| heat shock chaperone [Escherichia coli str. K-12 substr. MG1655]
CKII_4.04767.04767.2.dta	2.7073	2	R.IAISERPALNS*.-	gi|90111637|ref|NP_418141.2| heat shock chaperone [Escherichia coli str. K-12 substr. MG1655]
CKII_4.04831.04831.2.dta	2.9182	2	R.FIALSAKQS*G.-	gi|16130236|ref|NP_416804.1| predicted enzyme [Escherichia coli str. K-12 substr. MG1655]
CKII_4.04961.04961.3.dta	3.558	3	K.TGKLPSPQVVGAES*EEEDAS*HAA.-	gi|16129801|ref|NP_416362.1| conserved protein regulated by LexA [Escherichia coli str. K-12 substr. MG1655]
CKII_4.05189.05189.2.dta	2.9255	2	R.IETRDEELALAQS*A.-	gi|16130348|ref|NP_416917.1| sulfate/thiosulfate transporter subunit [Escherichia coli str. K-12 substr. MG1655]
CKII_4.05193.05193.2.dta	2.6467	2	R.LVYS*T*ETGRIDEPK.A	gi|90111241|ref|NP_415798.2| conserved protein [Escherichia coli str. K-12 substr. MG1655]
CKII_4.05336.05336.2.dta	3.5293	2	R.ENELEEAVM#S*DR.D	gi|16131060|ref|NP_417637.1| fused protein chain initiation factor 2, IF2: membrane protein/conserved protein [Escherichia coli str. K-12 substr. MG1655]
CKII_4.05435.05435.2.dta	3.2359	2	R.ENELEEAVM#S*DR.D	gi|16131060|ref|NP_417637.1| fused protein chain initiation factor 2, IF2: membrane protein/conserved protein [Escherichia coli str. K-12 substr. MG1655]
CKII_4.05458.05458.2.dta	3.13	2	K.EWLREPEETPAT*GD.-	gi|16129617|ref|NP_416176.1| predicted DNA-binding transcriptional regulator [Escherichia coli str. K-12 substr. MG1655]
CKII_4.05543.05543.2.dta	3.0937	2	R.ENELEEAVM#S*DR.D	gi|16131060|ref|NP_417637.1| fused protein chain initiation factor 2, IF2: membrane protein/conserved protein [Escherichia coli str. K-12 substr. MG1655]
CKII_4.05576.05576.2.dta	3.1413	2	R.TPAWLS*EGR.L	gi|16130176|ref|NP_416744.1| sn-glycerol-3-phosphate dehydrogenase (anaerobic), large subunit, FAD/NAD(P)-binding [Escherichia coli str. K-12 substr. MG1655]
CKII_4.05680.05680.2.dta	2.7126	2	R.TPAWLS*EGR.L	gi|16130176|ref|NP_416744.1| sn-glycerol-3-phosphate dehydrogenase (anaerobic), large subunit, FAD/NAD(P)-binding [Escherichia coli str. K-12 substr. MG1655]
CKII_4.05731.05731.2.dta	3.3286	2	R.LPQVEGT*GGDVQPSQDLVR.V	gi|16130513|ref|NP_417083.1| protein disaggregation chaperone [Escherichia coli str. K-12 substr. MG1655]
CKII_4.06060.06060.2.dta	2.9962	2	R.ENELEEAVM#S*DR.D	gi|16131060|ref|NP_417637.1| fused protein chain initiation factor 2, IF2: membrane protein/conserved protein [Escherichia coli str. K-12 substr. MG1655]
CKII_4.06189.06189.2.dta	3.0671	2	K.AGVDVLGIS*T*DKPEK.L	gi|16130405|ref|NP_416975.1| thiol peroxidase, thioredoxin-dependent [Escherichia coli str. K-12 substr. MG1655]
CKII_4.06337.06337.2.dta	2.9388	2	K.NLMS*DGNVQIVK.T	gi|16129622|ref|NP_416181.1| conserved protein [Escherichia coli str. K-12 substr. MG1655]
CKII_4.06348.06348.2.dta	3.607	2	R.ENELEEAVMS*DR.D	gi|16131060|ref|NP_417637.1| fused protein chain initiation factor 2, IF2: membrane protein/conserved protein [Escherichia coli str. K-12 substr. MG1655]
CKII_4.06357.06357.2.dta	3.0924	2	R.ENELEEAVM#S*DR.D	gi|16131060|ref|NP_417637.1| fused protein chain initiation factor 2, IF2: membrane protein/conserved protein [Escherichia coli str. K-12 substr. MG1655]
CKII_4.06430.06430.2.dta	3.9356	2	R.ENELEEAVMS*DR.D	gi|16131060|ref|NP_417637.1| fused protein chain initiation factor 2, IF2: membrane protein/conserved protein [Escherichia coli str. K-12 substr. MG1655]
CKII_4.06519.06519.2.dta	3.5904	2	R.ENELEEAVMS*DR.D	gi|16131060|ref|NP_417637.1| fused protein chain initiation factor 2, IF2: membrane protein/conserved protein [Escherichia coli str. K-12 substr. MG1655]
CKII_4.06612.06612.2.dta	3.39	2	R.ENELEEAVMS*DR.D	gi|16131060|ref|NP_417637.1| fused protein chain initiation factor 2, IF2: membrane protein/conserved protein [Escherichia coli str. K-12 substr. MG1655]
CKII_4.06899.06899.2.dta	2.9051	2	R.ENELEEAVMS*DR.D	gi|16131060|ref|NP_417637.1| fused protein chain initiation factor 2, IF2: membrane protein/conserved protein [Escherichia coli str. K-12 substr. MG1655]
CKII_4.06983.06983.2.dta	3.2152	2	R.ENELEEAVMS*DR.D	gi|16131060|ref|NP_417637.1| fused protein chain initiation factor 2, IF2: membrane protein/conserved protein [Escherichia coli str. K-12 substr. MG1655]
CKII_4.07079.07079.2.dta	3.1802	2	R.ENELEEAVMS*DR.D	gi|16131060|ref|NP_417637.1| fused protein chain initiation factor 2, IF2: membrane protein/conserved protein [Escherichia coli str. K-12 substr. MG1655]
CKII_4.07132.07132.2.dta	4.5104	2	R.SGVSHELVLNAIADCQS*A.-	gi|16131267|ref|NP_417848.1| 3-dehydroquinate synthase [Escherichia coli str. K-12 substr. MG1655]
CKII_4.07139.07139.3.dta	3.7153	3	R.QKLDTWFSEM#QPVEET*QDGE.-	gi|145698334|ref|NP_418301.3| GTP-binding protein [Escherichia coli str. K-12 substr. MG1655]
CKII_4.07166.07166.2.dta	2.9181	2	R.ENELEEAVMS*DR.D	gi|16131060|ref|NP_417637.1| fused protein chain initiation factor 2, IF2: membrane protein/conserved protein [Escherichia coli str. K-12 substr. MG1655]
CKII_4.07194.07194.2.dta	2.6303	2	K.VVANQIIHM#LES*N.-	gi|90111581|ref|YP_026215.2| shikimate kinase I [Escherichia coli str. K-12 substr. MG1655]
CKII_4.07245.07245.2.dta	3.5528	2	R.ENELEEAVMS*DR.D	gi|16131060|ref|NP_417637.1| fused protein chain initiation factor 2, IF2: membrane protein/conserved protein [Escherichia coli str. K-12 substr. MG1655]
CKII_4.07261.07261.2.dta	2.7988	2	R.GFKT*EIIEES*EGEVAGIK.S	gi|16130793|ref|NP_417367.1| peptide chain release factor RF-2 [Escherichia coli str. K-12 substr. MG1655]
CKII_4.07319.07319.2.dta	2.6281	2	R.ENELEEAVMS*DR.D	gi|16131060|ref|NP_417637.1| fused protein chain initiation factor 2, IF2: membrane protein/conserved protein [Escherichia coli str. K-12 substr. MG1655]
CKII_4.07396.07396.2.dta	2.8502	2	R.ENELEEAVMS*DR.D	gi|16131060|ref|NP_417637.1| fused protein chain initiation factor 2, IF2: membrane protein/conserved protein [Escherichia coli str. K-12 substr. MG1655]
CKII_4.07442.07442.2.dta	2.6786	2	K.GTVLNS*DISSVISR.L	gi|90111647|ref|NP_418204.2| predicted cytoplasmic sugar-binding protein [Escherichia coli str. K-12 substr. MG1655]
CKII_4.07466.07466.2.dta	2.7906	2	R.ENELEEAVMS*DR.D	gi|16131060|ref|NP_417637.1| fused protein chain initiation factor 2, IF2: membrane protein/conserved protein [Escherichia coli str. K-12 substr. MG1655]
CKII_4.07546.07546.2.dta	3.3427	2	R.ENELEEAVMS*DR.D	gi|16131060|ref|NP_417637.1| fused protein chain initiation factor 2, IF2: membrane protein/conserved protein [Escherichia coli str. K-12 substr. MG1655]
CKII_4.07861.07861.2.dta	3.3436	2	R.ENELEEAVMS*DR.D	gi|16131060|ref|NP_417637.1| fused protein chain initiation factor 2, IF2: membrane protein/conserved protein [Escherichia coli str. K-12 substr. MG1655]
CKII_4.07879.07879.2.dta	3.5131	2	K.VET*DFAAEVAAMSK.Q	gi|16128163|ref|NP_414712.1| protein chain elongation factor EF-Ts [Escherichia coli str. K-12 substr. MG1655]
CKII_4.07987.07987.2.dta	3.1799	2	R.ENELEEAVMS*DR.D	gi|16131060|ref|NP_417637.1| fused protein chain initiation factor 2, IF2: membrane protein/conserved protein [Escherichia coli str. K-12 substr. MG1655]
CKII_4.08188.08188.2.dta	3.3028	2	R.ENELEEAVMS*DR.D	gi|16131060|ref|NP_417637.1| fused protein chain initiation factor 2, IF2: membrane protein/conserved protein [Escherichia coli str. K-12 substr. MG1655]
CKII_4.08231.08231.2.dta	3.3142	2	K.SLSDTLEEVLS*SSGEK.S	gi|16130993|ref|NP_417569.1| conserved protein [Escherichia coli str. K-12 substr. MG1655]
CKII_4.08239.08239.2.dta	2.6745	2	R.ENELEEAVMS*DR.D	gi|16131060|ref|NP_417637.1| fused protein chain initiation factor 2, IF2: membrane protein/conserved protein [Escherichia coli str. K-12 substr. MG1655]
CKII_4.08421.08421.2.dta	2.7569	2	R.ENELEEAVMS*DR.D	gi|16131060|ref|NP_417637.1| fused protein chain initiation factor 2, IF2: membrane protein/conserved protein [Escherichia coli str. K-12 substr. MG1655]
CKII_5678.01932.01932.3.dta	3.3469	3	K.LADEVDES*AKEAEK.A	gi|16128457|ref|NP_415006.1| molecular chaperone HSP90 family [Escherichia coli str. K-12 substr. MG1655]
CKII_5678.02653.02653.2.dta	2.8208	2	R.LRNGDT*S*NGVELGK.S	gi|16128423|ref|NP_414972.1| ATPase and specificity subunit of ClpX-ClpP ATP-dependent serine protease [Escherichia coli str. K-12 substr. MG1655]
CKII_5678.03589.03589.3.dta	3.9648	3	K.IVT*EGDKSSVVNNPTGR.K	gi|16129439|ref|NP_415997.1| 30S ribosomal subunit protein S22 [Escherichia coli str. K-12 substr. MG1655]
CKII_5678.03750.03750.2.dta	3.2711	2	R.TFEVT*EDESKEK.Y	gi|16128625|ref|NP_415175.1| leucyl-tRNA synthetase [Escherichia coli str. K-12 substr. MG1655]
CKII_5678.03856.03856.2.dta	2.9222	2	K.RAVT*DS*DEPPVVR.Y	gi|16131262|ref|NP_417843.1| tryptophanyl-tRNA synthetase [Escherichia coli str. K-12 substr. MG1655]
CKII_5678.03950.03950.3.dta	3.6734	3	-.M#KS*VVNDT*DGIVR.V	gi|16130029|ref|NP_416594.1| galactitol-1-phosphate dehydrogenase, Zn-dependent and NAD(P)-binding [Escherichia coli str. K-12 substr. MG1655]
CKII_5678.04047.04047.3.dta	3.9589	3	K.LMEIAQQQHAQQQT*AGADASANNAK.D	gi|16128008|ref|NP_414555.1| chaperone Hsp70, co-chaperone with DnaJ [Escherichia coli str. K-12 substr. MG1655]
CKII_5678.04408.04408.3.dta	3.2635	3	K.NLYKES*DENDAQIAER.L	gi|90111130|ref|NP_414953.2| 2-carboxybenzaldehyde reductase, function unknown [Escherichia coli str. K-12 substr. MG1655]
CKII_5678.04887.04887.2.dta	3.7381	2	-.MKS*VVNDT*DGIVR.V	gi|16130029|ref|NP_416594.1| galactitol-1-phosphate dehydrogenase, Zn-dependent and NAD(P)-binding [Escherichia coli str. K-12 substr. MG1655]
CKII_5678.04974.04974.2.dta	2.9444	2	R.DAS*ES*DVEASLDR.L	gi|16128698|ref|NP_415251.1| succinate dehydrogenase, flavoprotein subunit [Escherichia coli str. K-12 substr. MG1655]
CKII_5678.04982.04982.3.dta	3.1196	3	K.TPVADS*EADKETAAAALDK.T	gi|16129046|ref|NP_415601.1| flagellar hook-filament junction protein [Escherichia coli str. K-12 substr. MG1655]
CKII_5678.05157.05157.3.dta	4.1212	3	R.VYDT*DDEENHQEFTCQPDMTCDDK.G	gi|16129185|ref|NP_415740.1| sensory histidine kinase in two-component regulatory system with NarL [Escherichia coli str. K-12 substr. MG1655]
CKII_5678.05216.05216.3.dta	4.3427	3	K.RDDDS*YDEDVEDDEGVGEVR.V	gi|16130338|ref|NP_416907.1| cell division protein involved in Z ring assembly [Escherichia coli str. K-12 substr. MG1655]
CKII_5678.05705.05705.3.dta	3.5105	3	K.TGKLPSPQVVGAES*EEEDASHAA.-	gi|16129801|ref|NP_416362.1| conserved protein regulated by LexA [Escherichia coli str. K-12 substr. MG1655]
CKII_5678.05765.05765.2.dta	3.6459	2	K.TGKLPSPQVVGAES*EEEDASHAA.-	gi|16129801|ref|NP_416362.1| conserved protein regulated by LexA [Escherichia coli str. K-12 substr. MG1655]
CKII_5678.05806.05806.3.dta	4.3046	3	K.IGEVHDGAAT*MDWM#EQEQER.G	gi|16131219|ref|NP_417799.1| protein chain elongation factor EF-G, GTP-binding [Escherichia coli str. K-12 substr. MG1655]
CKII_5678.05815.05815.2.dta	2.8707	2	K.WKDEYLDQGNQT*QP.-	gi|90111568|ref|NP_417738.4| conserved protein [Escherichia coli str. K-12 substr. MG1655]
CKII_5678.05834.05834.3.dta	3.4201	3	R.ENELEEAVM#S*DRDTGAAAEPR.A	gi|16131060|ref|NP_417637.1| fused protein chain initiation factor 2, IF2: membrane protein/conserved protein [Escherichia coli str. K-12 substr. MG1655]
CKII_5678.05987.05987.3.dta	3.0693	3	R.ENELEEAVM#S*DRDTGAAAEPR.A	gi|16131060|ref|NP_417637.1| fused protein chain initiation factor 2, IF2: membrane protein/conserved protein [Escherichia coli str. K-12 substr. MG1655]
CKII_5678.06049.06049.3.dta	3.2773	3	K.LDKVTGET*GEAIDDLR.N	gi|90111511|ref|NP_417385.4| predicted protein [Escherichia coli str. K-12 substr. MG1655]
CKII_5678.06066.06066.3.dta	3.7946	3	-.MHENQQPQT*EAFELS*AAER.E	gi|16130220|ref|NP_416788.1| NADH:ubiquinone oxidoreductase, chain E [Escherichia coli str. K-12 substr. MG1655]
CKII_5678.06132.06132.3.dta	3.3708	3	K.YRPET*DM#ADLDNFDAAK.A	gi|16131955|ref|NP_418553.1| lysine tRNA synthetase, inducible [Escherichia coli str. K-12 substr. MG1655]
CKII_5678.06206.06206.3.dta	3.0576	3	H.YYDELPT*EGNEHGQAFR.D	gi|16129570|ref|NP_416129.1| fumarate hydratase (fumarase A), aerobic Class I [Escherichia coli str. K-12 substr. MG1655]
CKII_5678.06206.06206.3.dta	3.0576	3	H.YYDELPT*EGNEHGQAFR.D	gi|16131948|ref|NP_418546.1| anaerobic class I fumarate hydratase (fumarase B) [Escherichia coli str. K-12 substr. MG1655]
CKII_5678.06253.06253.3.dta	3.2926	3	K.LFT*DM#CEGLPEKR.L	gi|16128327|ref|NP_414876.1| thiogalactoside acetyltransferase [Escherichia coli str. K-12 substr. MG1655]
CKII_5678.06297.06297.3.dta	4.2241	3	K.ERNEEPEIEEEIDES*EDET*VDEER.V	gi|16131266|ref|NP_417847.1| predicted protein [Escherichia coli str. K-12 substr. MG1655]
CKII_5678.06324.06324.3.dta	3.727	3	R.EES*EAEQAVARPQVTVIPR.E	gi|162135892|ref|NP_414685.4| poly(A) polymerase I [Escherichia coli str. K-12 substr. MG1655]
CKII_5678.06366.06366.3.dta	3.1492	3	K.IGEVHDGAAT*M#DWMEQEQER.G	gi|16131219|ref|NP_417799.1| protein chain elongation factor EF-G, GTP-binding [Escherichia coli str. K-12 substr. MG1655]
CKII_5678.06445.06445.3.dta	3.4347	3	K.ERNEEPEIEEEIDES*EDET*VDEER.V	gi|16131266|ref|NP_417847.1| predicted protein [Escherichia coli str. K-12 substr. MG1655]
CKII_5678.06546.06546.3.dta	4.1248	3	K.ERNEEPEIEEEIDES*EDET*VDEER.V	gi|16131266|ref|NP_417847.1| predicted protein [Escherichia coli str. K-12 substr. MG1655]
CKII_5678.06701.06701.3.dta	3.2517	3	K.ELYS*EEAVNGETQQAHLQAIK.E	gi|16129575|ref|NP_416134.1| beta-D-glucuronidase [Escherichia coli str. K-12 substr. MG1655]
CKII_5678.06827.06827.3.dta	3.2	3	R.ENELEEAVMS*DRDTGAAAEPR.A	gi|16131060|ref|NP_417637.1| fused protein chain initiation factor 2, IF2: membrane protein/conserved protein [Escherichia coli str. K-12 substr. MG1655]
CKII_5678.06890.06890.2.dta	3.5031	2	K.SEIT*DEEYKEFYK.H	gi|16128457|ref|NP_415006.1| molecular chaperone HSP90 family [Escherichia coli str. K-12 substr. MG1655]
CKII_5678.07270.07270.3.dta	3.8202	3	K.IGEVHDGAAT*MDWMEQEQER.G	gi|16131219|ref|NP_417799.1| protein chain elongation factor EF-G, GTP-binding [Escherichia coli str. K-12 substr. MG1655]
CKII_5678.07304.07304.3.dta	3.6533	3	R.YAAVTTAASAEQGAQALQDAGYAT*DPHYAR.K	gi|16129044|ref|NP_415599.1| muramidase [Escherichia coli str. K-12 substr. MG1655]
CKII_5678.07367.07367.3.dta	3.2678	3	K.VPPEPVHADIPVGAVS*DVKA.-	gi|16131946|ref|NP_418544.1| melibiose:sodium symporter [Escherichia coli str. K-12 substr. MG1655]
CKII_5678.07466.07466.3.dta	3.3251	3	R.ILKS*DDDLEPVVIGR.V	gi|16130202|ref|NP_416770.1| predicted acyltransferase with acyl-CoA N-acyltransferase domain [Escherichia coli str. K-12 substr. MG1655]
CKII_5678.07469.07469.2.dta	3.0025	2	K.TQHLGSITAEQLES*V.-	gi|90111463|ref|NP_417078.4| conserved protein [Escherichia coli str. K-12 substr. MG1655]
CKII_5678.07497.07497.3.dta	3.0711	3	K.VPPEPVHADIPVGAVS*DVKA.-	gi|16131946|ref|NP_418544.1| melibiose:sodium symporter [Escherichia coli str. K-12 substr. MG1655]
CKII_5678.07509.07509.3.dta	3.401	3	R.GFKTEIIEES*EGEVAGIK.S	gi|16130793|ref|NP_417367.1| peptide chain release factor RF-2 [Escherichia coli str. K-12 substr. MG1655]
CKII_5678.07663.07663.3.dta	3.9177	3	R.AYALQDQGYDT*VEANHQLGFAADER.D	gi|16129238|ref|NP_415793.1| GTP cyclohydrolase II [Escherichia coli str. K-12 substr. MG1655]
CKII_5678.07796.07796.4.dta	3.2907	4	K.LMEIAQQQHAQQQTAGADAS*ANNAKDDDVVDAEFEEVK.D	gi|16128008|ref|NP_414555.1| chaperone Hsp70, co-chaperone with DnaJ [Escherichia coli str. K-12 substr. MG1655]
CKII_5678.07809.07809.3.dta	3.0479	3	R.AYALQDQGYDT*VEANHQLGFAADER.D	gi|16129238|ref|NP_415793.1| GTP cyclohydrolase II [Escherichia coli str. K-12 substr. MG1655]
CKII_5678.07858.07858.3.dta	3.9838	3	R.GREISPGVECQT*DEQLDEFVR.N	gi|16128296|ref|NP_414845.1| choline dehydrogenase, a flavoprotein [Escherichia coli str. K-12 substr. MG1655]
CKII_5678.07975.07975.3.dta	4.1055	3	R.FAGTET*ERLEDLNSLAR.L	gi|16129155|ref|NP_415710.1| L,D-carboxypeptidase A [Escherichia coli str. K-12 substr. MG1655]
CKII_5678.08009.08009.3.dta	3.7524	3	K.YRPET*DMADLDNFDAAK.A	gi|16131955|ref|NP_418553.1| lysine tRNA synthetase, inducible [Escherichia coli str. K-12 substr. MG1655]
CKII_5678.08014.08014.2.dta	4.4628	2	K.YRPET*DMADLDNFDAAK.A	gi|16131955|ref|NP_418553.1| lysine tRNA synthetase, inducible [Escherichia coli str. K-12 substr. MG1655]
CKII_5678.08034.08034.2.dta	3.1149	2	K.GAGLVDFIHS*ESR.L	gi|16131734|ref|NP_418330.1| formate dehydrogenase-O, large subunit [Escherichia coli str. K-12 substr. MG1655]
CKII_5678.08216.08216.3.dta	3.2447	3	R.TGNTDSLALQNIGLET*DSRGQLK.V	gi|90111670|ref|NP_418397.2| pyridine nucleotide transhydrogenase, soluble [Escherichia coli str. K-12 substr. MG1655]
CKII_5678.08491.08491.3.dta	4.3942	3	R.ISCVVHIGDGEFT*DIER.K	gi|16128922|ref|NP_415475.1| predicted peptidase [Escherichia coli str. K-12 substr. MG1655]
CKII_5678.08522.08522.3.dta	3.4269	3	R.FKDEIVPVMTQSNGQTLVVDT*DEQPR.T	gi|90111494|ref|NP_417321.2| predicted acyltransferase [Escherichia coli str. K-12 substr. MG1655]
CKII_5678.08542.08542.3.dta	3.1083	3	R.TDINQALNRLPQVEGT*GGDVQPSQDLVR.V	gi|16130513|ref|NP_417083.1| protein disaggregation chaperone [Escherichia coli str. K-12 substr. MG1655]
CKII_5678.08596.08596.3.dta	3.6151	3	K.VQKLS*DISLEELPR.F	gi|16132206|ref|NP_418806.1| predicted repair protein [Escherichia coli str. K-12 substr. MG1655]
CKII_5678.08672.08672.3.dta	3.2413	3	K.FAEQFAALS*DNYLKER.A	gi|16130733|ref|NP_417306.1| fused PTS enzyme: PEP-protein phosphotransferase (enzyme I)/GAF domain containing protein [Escherichia coli str. K-12 substr. MG1655]
CKII_5678.08697.08697.3.dta	3.3667	3	K.LARPGS*DVALDDQLYQEPQAAPVAVPMGK.F	gi|16132183|ref|NP_418782.1| DNA biosynthesis protein (primosomal protein I) [Escherichia coli str. K-12 substr. MG1655]
CKII_5678.08716.08716.3.dta	3.0083	3	R.GES*EEELDQVQLMTLHASK.G	gi|49176407|ref|YP_026251.1| DNA helicase and single-stranded DNA-dependent ATPase [Escherichia coli str. K-12 substr. MG1655]
CKII_5678.08745.08745.3.dta	3.0621	3	K.DAIAT*VNKQEDANFSNNAMAEAFK.A	gi|16128878|ref|NP_415431.1| 30S ribosomal subunit protein S1 [Escherichia coli str. K-12 substr. MG1655]
CKII_5678.08908.08908.2.dta	2.9875	2	R.GLET*GADDYITKPFSPK.E	gi|16128384|ref|NP_414933.1| DNA-binding response regulator in two-component regulatory system with PhoR (or CreC) [Escherichia coli str. K-12 substr. MG1655]
CKII_5678.09001.09001.3.dta	3.0737	3	K.S*DDNRNNVIGLLEDPK.S	gi|16131262|ref|NP_417843.1| tryptophanyl-tRNA synthetase [Escherichia coli str. K-12 substr. MG1655]
CKII_5678.09199.09199.3.dta	3.6283	3	K.VVIDESVIDGQSKPLLIYGKPEAQQAS*GE.-	gi|16128423|ref|NP_414972.1| ATPase and specificity subunit of ClpX-ClpP ATP-dependent serine protease [Escherichia coli str. K-12 substr. MG1655]
CKII_5678.09335.09335.3.dta	3.082	3	K.VVIDESVIDGQSKPLLIYGKPEAQQAS*GE.-	gi|16128423|ref|NP_414972.1| ATPase and specificity subunit of ClpX-ClpP ATP-dependent serine protease [Escherichia coli str. K-12 substr. MG1655]
CKII_5678.09414.09414.2.dta	4.6141	2	R.HAS*DDEPFSALAFK.I	gi|16131219|ref|NP_417799.1| protein chain elongation factor EF-G, GTP-binding [Escherichia coli str. K-12 substr. MG1655]
CKII_5678.09499.09499.3.dta	3.2393	3	K.AETYFVALDDTGHVINSGYQT*CAEYDTDPQAAK.-	gi|16129693|ref|NP_416253.1| DNA-binding transcriptional activator [Escherichia coli str. K-12 substr. MG1655]
CKII_5678.09541.09541.2.dta	4.6032	2	R.HAS*DDEPFSALAFK.I	gi|16131219|ref|NP_417799.1| protein chain elongation factor EF-G, GTP-binding [Escherichia coli str. K-12 substr. MG1655]
CKII_5678.09616.09616.3.dta	3.5875	3	K.VVIDESVIDGQSKPLLIYGKPEAQQAS*GE.-	gi|16128423|ref|NP_414972.1| ATPase and specificity subunit of ClpX-ClpP ATP-dependent serine protease [Escherichia coli str. K-12 substr. MG1655]
CKII_5678.09628.09628.3.dta	3.1589	3	R.DDIVWTYSGVRPLCDDES*DSPQAITR.D	gi|16131300|ref|NP_417884.1| sn-glycerol-3-phosphate dehydrogenase, aerobic, FAD/NAD(P)-binding [Escherichia coli str. K-12 substr. MG1655]
CKII_5678.09639.09639.3.dta	4.3934	3	K.GDYLAYS*EEEHPVALQLGGSDPAALAQCAK.L	gi|145698340|ref|NP_418473.2| tRNA-dihydrouridine synthase A [Escherichia coli str. K-12 substr. MG1655]
CKII_5678.10000.10000.2.dta	3.599	2	K.LHEEAMALPS*EEEFAER.K	gi|16129047|ref|NP_415602.1| fused ribonucleaseE: endoribonuclease/RNA-binding protein/RNA degradosome binding protein [Escherichia coli str. K-12 substr. MG1655]
CKII_5678.10158.10158.3.dta	3.4801	3	K.AKS*DKAS*EGELLAQVEPEDLIK.F	gi|16128423|ref|NP_414972.1| ATPase and specificity subunit of ClpX-ClpP ATP-dependent serine protease [Escherichia coli str. K-12 substr. MG1655]
CKII_5678.10379.10379.3.dta	3.6559	3	H.DPEAS*ENDKYVALQFLR.N	gi|16129570|ref|NP_416129.1| fumarate hydratase (fumarase A), aerobic Class I [Escherichia coli str. K-12 substr. MG1655]
CKII_5678.10379.10379.3.dta	3.6559	3	H.DPEAS*ENDKYVALQFLR.N	gi|16131948|ref|NP_418546.1| anaerobic class I fumarate hydratase (fumarase B) [Escherichia coli str. K-12 substr. MG1655]
CKII_5678.10426.10426.3.dta	3.3165	3	R.KIEFVEIYEPFS*EGQAK.A	gi|16131103|ref|NP_417680.1| glutamate synthase, 4Fe-4S protein, small subunit [Escherichia coli str. K-12 substr. MG1655]
CKII_5678.10525.10525.3.dta	4.2777	3	R.APGS*DKWQQISWEEAFDR.I	gi|16131734|ref|NP_418330.1| formate dehydrogenase-O, large subunit [Escherichia coli str. K-12 substr. MG1655]
CKII_5678.10597.10597.3.dta	3.1839	3	-.M#YQVVAS*DLDGTLLSPDHTLSPYAK.E	gi|49176424|ref|YP_026267.1| predicted hydrolase [Escherichia coli str. K-12 substr. MG1655]
CKII_5678.10663.10663.3.dta	3.9255	3	K.YGLNIKPVILAADGS*EPDLSQQALTEK.G	gi|16128625|ref|NP_415175.1| leucyl-tRNA synthetase [Escherichia coli str. K-12 substr. MG1655]
CKII_5678.10782.10782.3.dta	4.595	3	R.YMHLFSGEVEDQPAVT*DMSNAVDGDLQAR.V	gi|16129030|ref|NP_415585.1| conserved protein [Escherichia coli str. K-12 substr. MG1655]
CKII_5678.10828.10828.2.dta	2.8062	2	K.DITLAMDCAAS*EFYKDGK.Y	gi|16130686|ref|NP_417259.1| enolase [Escherichia coli str. K-12 substr. MG1655]
CKII_5678.10940.10940.3.dta	3.0973	3	K.IAAALDELGYIPNRAPDILS*NATSR.A	gi|49176356|ref|YP_026222.1| DNA-binding transcriptional repressor [Escherichia coli str. K-12 substr. MG1655]
CKII_5678.10974.10974.2.dta	3.2514	2	K.IVS*DLDDAIAHIR.E	gi|16128229|ref|NP_414778.1| gamma-glutamylphosphate reductase [Escherichia coli str. K-12 substr. MG1655]
CKII_5678.11046.11046.3.dta	3.3318	3	K.DFLQS*DGKPGYFAQELQVYGR.K	gi|16131506|ref|NP_418092.1| formamidopyrimidine/5-formyluracil/ 5-hydroxymethyluracil DNA glycosylase [Escherichia coli str. K-12 substr. MG1655]
CKII_5678.11059.11059.3.dta	3.0816	3	K.AGYSLVVADRNPEAIADVIAAGAET*ASTAK.A	gi|145698315|ref|NP_417594.3| tartronate semialdehyde reductase [Escherichia coli str. K-12 substr. MG1655]
CKII_5678.11109.11109.3.dta	3.0407	3	R.IVMS*DAERTDDDLYDTVIGYR.G	gi|16128225|ref|NP_414774.1| hydrolase, binds to enzyme IIA(Glc) [Escherichia coli str. K-12 substr. MG1655]
CKII_5678.11165.11165.4.dta	3.1117	4	K.NALATIAQAQEES*LGDNKPADDLLNLEGVDR.D	gi|16131061|ref|NP_417638.1| transcription termination/antitermination L factor [Escherichia coli str. K-12 substr. MG1655]
CKII_5678.11167.11167.3.dta	3.0288	3	-.MYQVVAS*DLDGTLLSPDHTLSPYAK.E	gi|49176424|ref|YP_026267.1| predicted hydrolase [Escherichia coli str. K-12 substr. MG1655]
CKII_5678.11279.11279.3.dta	3.2869	3	K.AM#TDVTGFGLLGHLS*EMCQGAGVQAR.V	gi|16129718|ref|NP_416278.1| selenophosphate synthase [Escherichia coli str. K-12 substr. MG1655]
CKII_5678.11292.11292.3.dta	3.4654	3	R.AVVNKPAVLLADEPTGNLDDALS*EGILR.L	gi|16131335|ref|NP_417920.1| predicted transporter subunit: ATP-binding component of ABC superfamily [Escherichia coli str. K-12 substr. MG1655]
CKII_5678.11336.11336.3.dta	3.1874	3	R.YSVLTAAHWGPM#LVET*DGETVFSSR.G	gi|145698325|ref|NP_418007.3| biotin sulfoxide reductase [Escherichia coli str. K-12 substr. MG1655]
CKII_5678.11371.11371.3.dta	3.3639	3	R.SGVSLEGINYLDGGIS*DAIPVKEAAR.Q	gi|16132195|ref|NP_418794.1| predicted esterase [Escherichia coli str. K-12 substr. MG1655]
CKII_5678.11399.11399.3.dta	4.1095	3	R.LIQEQADASHYFS*DEFQPLLNTEGPVK.Y	gi|16130266|ref|NP_416834.1| conserved protein [Escherichia coli str. K-12 substr. MG1655]
CKII_5678.11425.11425.3.dta	3.7164	3	R.GFKT*EIIEESEGEVAGIK.S	gi|16130793|ref|NP_417367.1| peptide chain release factor RF-2 [Escherichia coli str. K-12 substr. MG1655]
CKII_5678.11668.11668.2.dta	3.3269	2	K.FHPWSIEEIVASEQS*A.-	gi|90111352|ref|NP_416389.4| predicted metal-binding enzyme [Escherichia coli str. K-12 substr. MG1655]
CKII_5678.11670.11670.3.dta	4.324	3	R.IYELLDKT*DIDDVTQLAK.A	gi|16129658|ref|NP_416217.1| phosphoenolpyruvate synthase [Escherichia coli str. K-12 substr. MG1655]
CKII_5678.11959.11959.3.dta	4.2329	3	R.TVGVVAALLS*DTQRDDFVAR.T	gi|16131845|ref|NP_418443.1| homocysteine-N5-methyltetrahydrofolate transmethylase, B12-dependent [Escherichia coli str. K-12 substr. MG1655]
CKII_5678.11982.11982.3.dta	3.0037	3	R.YSVLTAAHWGPMLVET*DGETVFSSR.G	gi|145698325|ref|NP_418007.3| biotin sulfoxide reductase [Escherichia coli str. K-12 substr. MG1655]
CKII_5678.12037.12037.3.dta	3.1475	3	R.AIGEVT*DVVEKEMYTFEDR.N	gi|16130439|ref|NP_417009.1| histidyl tRNA synthetase [Escherichia coli str. K-12 substr. MG1655]
CKII_5678.12068.12068.3.dta	5.2097	3	K.AAALALGYLS*EAEFDSWVRPEQM#VGSM#K.A	gi|16129569|ref|NP_416128.1| fumarate hydratase (fumarase C),aerobic Class II [Escherichia coli str. K-12 substr. MG1655]
CKII_5678.12166.12166.3.dta	3.9917	3	K.ISPHQLGLADVLS*ALR.F	gi|16130893|ref|NP_417467.1| predicted maturation element for hydrogenase 2 [Escherichia coli str. K-12 substr. MG1655]
CKII_5678r.02910.02910.2.dta	3.8203	2	K.LANTAIDS*DKVAEK.I	gi|16129189|ref|NP_415744.1| molybdenum-cofactor-assembly chaperone subunit (delta subunit) of nitrate reductase 1 [Escherichia coli str. K-12 substr. MG1655]
CKII_5678r.04222.04222.3.dta	3.8536	3	K.LMEIAQQQHAQQQT*AGADASANNAK.D	gi|16128008|ref|NP_414555.1| chaperone Hsp70, co-chaperone with DnaJ [Escherichia coli str. K-12 substr. MG1655]
CKII_5678r.04429.04429.3.dta	3.2781	3	R.LANELS*DAAENKGTAVK.K	gi|16131220|ref|NP_417800.1| 30S ribosomal subunit protein S7 [Escherichia coli str. K-12 substr. MG1655]
CKII_5678r.05182.05182.2.dta	4.1645	2	-.MKS*VVNDT*DGIVR.V	gi|16130029|ref|NP_416594.1| galactitol-1-phosphate dehydrogenase, Zn-dependent and NAD(P)-binding [Escherichia coli str. K-12 substr. MG1655]
CKII_5678r.05255.05255.3.dta	4.2874	3	K.IGEVHDGAAT*M#DWM#EQEQER.G	gi|16131219|ref|NP_417799.1| protein chain elongation factor EF-G, GTP-binding [Escherichia coli str. K-12 substr. MG1655]
CKII_5678r.05286.05286.3.dta	3.0832	3	K.TPVADS*EADKETAAAALDK.T	gi|16129046|ref|NP_415601.1| flagellar hook-filament junction protein [Escherichia coli str. K-12 substr. MG1655]
CKII_5678r.05430.05430.2.dta	4.239	2	K.RDDDS*YDEDVEDDEGVGEVR.V	gi|16130338|ref|NP_416907.1| cell division protein involved in Z ring assembly [Escherichia coli str. K-12 substr. MG1655]
CKII_5678r.05534.05534.3.dta	3.6142	3	R.FHTLSGGKPQVEGAEDYT*DS*DD.-	gi|16131624|ref|NP_418213.1| conserved protein [Escherichia coli str. K-12 substr. MG1655]
CKII_5678r.05936.05936.3.dta	3.7681	3	K.TGKLPSPQVVGAES*EEEDASHAA.-	gi|16129801|ref|NP_416362.1| conserved protein regulated by LexA [Escherichia coli str. K-12 substr. MG1655]
CKII_5678r.06009.06009.3.dta	5.1576	3	K.IGEVHDGAAT*MDWM#EQEQER.G	gi|16131219|ref|NP_417799.1| protein chain elongation factor EF-G, GTP-binding [Escherichia coli str. K-12 substr. MG1655]
CKII_5678r.06143.06143.3.dta	3.3522	3	K.LHEEAM#ALPS*EEEFAER.K	gi|16129047|ref|NP_415602.1| fused ribonucleaseE: endoribonuclease/RNA-binding protein/RNA degradosome binding protein [Escherichia coli str. K-12 substr. MG1655]
CKII_5678r.06173.06173.3.dta	3.3864	3	K.IGEVHDGAAT*M#DWMEQEQER.G	gi|16131219|ref|NP_417799.1| protein chain elongation factor EF-G, GTP-binding [Escherichia coli str. K-12 substr. MG1655]
CKII_5678r.06206.06206.3.dta	3.0393	3	-.MHENQQPQT*EAFELS*AAER.E	gi|16130220|ref|NP_416788.1| NADH:ubiquinone oxidoreductase, chain E [Escherichia coli str. K-12 substr. MG1655]
CKII_5678r.06946.06946.3.dta	3.4875	3	R.LAQMQQLSHQDDDS*AAAAALAAQTGER.K	gi|16128091|ref|NP_414640.1| preprotein translocase subunit, ATPase [Escherichia coli str. K-12 substr. MG1655]
CKII_5678r.07092.07092.3.dta	3.6071	3	K.IGEVHDGAAT*MDWMEQEQER.G	gi|16131219|ref|NP_417799.1| protein chain elongation factor EF-G, GTP-binding [Escherichia coli str. K-12 substr. MG1655]
CKII_5678r.07332.07332.2.dta	3.4913	2	R.ILKS*DDDLEPVVIGR.V	gi|16130202|ref|NP_416770.1| predicted acyltransferase with acyl-CoA N-acyltransferase domain [Escherichia coli str. K-12 substr. MG1655]
CKII_5678r.07420.07420.3.dta	3.2922	3	K.GGPLADGIVITPS*HNPPEDGGIK.Y	gi|16128664|ref|NP_415214.1| phosphoglucomutase [Escherichia coli str. K-12 substr. MG1655]
CKII_5678r.07431.07431.3.dta	3.1588	3	R.AYALQDQGYDT*VEANHQLGFAADER.D	gi|16129238|ref|NP_415793.1| GTP cyclohydrolase II [Escherichia coli str. K-12 substr. MG1655]
CKII_5678r.07557.07557.3.dta	3.4938	3	K.GGPLADGIVITPS*HNPPEDGGIK.Y	gi|16128664|ref|NP_415214.1| phosphoglucomutase [Escherichia coli str. K-12 substr. MG1655]
CKII_5678r.07592.07592.2.dta	3.5406	2	R.GYDS*AGLAVVDAEGHMTR.L	gi|16131597|ref|NP_418185.1| L-glutamine:D-fructose-6-phosphate aminotransferase [Escherichia coli str. K-12 substr. MG1655]
CKII_5678r.07628.07628.3.dta	3.475	3	R.GREISPGVECQT*DEQLDEFVR.N	gi|16128296|ref|NP_414845.1| choline dehydrogenase, a flavoprotein [Escherichia coli str. K-12 substr. MG1655]
CKII_5678r.07983.07983.3.dta	3.149	3	R.FGDVGADT*LGHIAEACAK.G	gi|16132200|ref|NP_418800.1| phosphopentomutase [Escherichia coli str. K-12 substr. MG1655]
CKII_5678r.08129.08129.3.dta	3.1255	3	K.YIDDVFTEGHGTLYAS*DGR.T	gi|16130924|ref|NP_417500.1| NADPH quinone reductase [Escherichia coli str. K-12 substr. MG1655]
CKII_5678r.08158.08158.2.dta	3.8877	2	R.NKVT*DAEIAEVLAR.W	gi|16130513|ref|NP_417083.1| protein disaggregation chaperone [Escherichia coli str. K-12 substr. MG1655]
CKII_5678r.08387.08387.3.dta	3.6793	3	R.ISCVVHIGDGEFT*DIER.K	gi|16128922|ref|NP_415475.1| predicted peptidase [Escherichia coli str. K-12 substr. MG1655]
CKII_5678r.08519.08519.3.dta	4.9246	3	K.VQKLS*DISLEELPR.F	gi|16132206|ref|NP_418806.1| predicted repair protein [Escherichia coli str. K-12 substr. MG1655]
CKII_5678r.08520.08520.3.dta	4.6122	3	R.TDINQALNRLPQVEGT*GGDVQPSQDLVR.V	gi|16130513|ref|NP_417083.1| protein disaggregation chaperone [Escherichia coli str. K-12 substr. MG1655]
CKII_5678r.08650.08650.2.dta	3.4072	2	K.LFT*DMCEGLPEKR.L	gi|16128327|ref|NP_414876.1| thiogalactoside acetyltransferase [Escherichia coli str. K-12 substr. MG1655]
CKII_5678r.08734.08734.2.dta	4.0373	2	R.GLET*GADDYITKPFSPK.E	gi|16128384|ref|NP_414933.1| DNA-binding response regulator in two-component regulatory system with PhoR (or CreC) [Escherichia coli str. K-12 substr. MG1655]
CKII_5678r.08962.08962.3.dta	3.7129	3	R.LDRDS*EGLLVLTNNGALQAR.L	gi|162135898|ref|NP_415653.4| 23S rRNA pseudouridine synthase [Escherichia coli str. K-12 substr. MG1655]
CKII_5678r.09052.09052.3.dta	3.695	3	K.VVIDESVIDGQSKPLLIYGKPEAQQAS*GE.-	gi|16128423|ref|NP_414972.1| ATPase and specificity subunit of ClpX-ClpP ATP-dependent serine protease [Escherichia coli str. K-12 substr. MG1655]
CKII_5678r.09149.09149.2.dta	3.7927	2	R.HAS*DDEPFSALAFK.I	gi|16131219|ref|NP_417799.1| protein chain elongation factor EF-G, GTP-binding [Escherichia coli str. K-12 substr. MG1655]
CKII_5678r.09266.09266.2.dta	4.0641	2	R.HAS*DDEPFSALAFK.I	gi|16131219|ref|NP_417799.1| protein chain elongation factor EF-G, GTP-binding [Escherichia coli str. K-12 substr. MG1655]
CKII_5678r.09386.09386.2.dta	3.7608	2	R.HAS*DDEPFSALAFK.I	gi|16131219|ref|NP_417799.1| protein chain elongation factor EF-G, GTP-binding [Escherichia coli str. K-12 substr. MG1655]
CKII_5678r.09510.09510.2.dta	3.4138	2	R.HAS*DDEPFSALAFK.I	gi|16131219|ref|NP_417799.1| protein chain elongation factor EF-G, GTP-binding [Escherichia coli str. K-12 substr. MG1655]
CKII_5678r.09511.09511.3.dta	3.494	3	K.GDYLAYS*EEEHPVALQLGGSDPAALAQCAK.L	gi|145698340|ref|NP_418473.2| tRNA-dihydrouridine synthase A [Escherichia coli str. K-12 substr. MG1655]
CKII_5678r.09542.09542.3.dta	3.1465	3	R.AAGEKPENGVFWES*AGEGEYTVADITK.E	gi|16128457|ref|NP_415006.1| molecular chaperone HSP90 family [Escherichia coli str. K-12 substr. MG1655]
CKII_5678r.09981.09981.3.dta	3.2008	3	R.YEGEIIQS*DRPGENILLFK.R	gi|16129376|ref|NP_415933.1| aldehyde dehydrogenase A, NAD-linked [Escherichia coli str. K-12 substr. MG1655]
CKII_5678r.10015.10015.3.dta	3.536	3	H.DPEAS*ENDKYVALQFLR.N	gi|16129570|ref|NP_416129.1| fumarate hydratase (fumarase A), aerobic Class I [Escherichia coli str. K-12 substr. MG1655]
CKII_5678r.10015.10015.3.dta	3.536	3	H.DPEAS*ENDKYVALQFLR.N	gi|16131948|ref|NP_418546.1| anaerobic class I fumarate hydratase (fumarase B) [Escherichia coli str. K-12 substr. MG1655]
CKII_5678r.10293.10293.3.dta	3.3855	3	R.EAGVQEADFLANVDKLS*EDAFDDQCTGANPR.Y	gi|16129202|ref|NP_415757.1| fused acetaldehyde-CoA dehydrogenase/iron-dependent alcohol dehydrogenase/pyruvate-formate lyase deactivase [Escherichia coli str. K-12 substr. MG1655]
CKII_5678r.10409.10409.3.dta	3.9238	3	R.EIGYVHS*DMGFDANSCAVLSAIGK.Q	gi|16130843|ref|NP_417417.1| methionine adenosyltransferase 1 [Escherichia coli str. K-12 substr. MG1655]
CKII_5678r.10467.10467.3.dta	3.0269	3	R.ASINT*DDPGVQGVDIIHEYTVAAPAAGLSR.E	gi|16129581|ref|NP_416140.1| adenosine deaminase [Escherichia coli str. K-12 substr. MG1655]
CKII_5678r.10817.10817.3.dta	3.336	3	K.NALATIAQAQEES*LGDNKPADDLLNLEGVDR.D	gi|16131061|ref|NP_417638.1| transcription termination/antitermination L factor [Escherichia coli str. K-12 substr. MG1655]
CKII_5678r.10967.10967.3.dta	3.1894	3	R.YSVLTAAHWGPM#LVET*DGETVFSSR.G	gi|145698325|ref|NP_418007.3| biotin sulfoxide reductase [Escherichia coli str. K-12 substr. MG1655]
CKII_5678r.11216.11216.3.dta	4.5548	3	R.FEVGEGIEKVET*DFAAEVAAM#SK.Q	gi|16128163|ref|NP_414712.1| protein chain elongation factor EF-Ts [Escherichia coli str. K-12 substr. MG1655]
CKII_5678r.11221.11221.2.dta	3.5982	2	R.IYELLDKT*DIDDVTQLAK.A	gi|16129658|ref|NP_416217.1| phosphoenolpyruvate synthase [Escherichia coli str. K-12 substr. MG1655]
CKII_5678r.11232.11232.2.dta	3.9064	2	K.FHPWSIEEIVASEQS*A.-	gi|90111352|ref|NP_416389.4| predicted metal-binding enzyme [Escherichia coli str. K-12 substr. MG1655]
CKII_5678r.11354.11354.3.dta	4.2512	3	K.VVNDNAPQT*AKEPDYLDIPAFLR.K	gi|16128088|ref|NP_414637.1| GTP-binding tubulin-like cell division protein [Escherichia coli str. K-12 substr. MG1655]
CKII_5678r.11406.11406.3.dta	3.2665	3	K.AAALALGYLS*EAEFDSWVRPEQM#VGSM#K.A	gi|16129569|ref|NP_416128.1| fumarate hydratase (fumarase C),aerobic Class II [Escherichia coli str. K-12 substr. MG1655]
CKII_5678r.11436.11436.3.dta	4.5976	3	K.ERNEEPEIEEEIDES*EDET*VDEER.V	gi|16131266|ref|NP_417847.1| predicted protein [Escherichia coli str. K-12 substr. MG1655]
CKII_9101112.01031.01031.3.dta	3.077	3	R.NSEEART*DRPSQQLR.S	gi|16128329|ref|NP_414878.1| beta-D-galactosidase [Escherichia coli str. K-12 substr. MG1655]
CKII_9101112.01236.01236.2.dta	3.2621	2	K.ATHADS*AVNVTK.F	gi|16130898|ref|NP_417472.1| predicted protein [Escherichia coli str. K-12 substr. MG1655]
CKII_9101112.01687.01687.2.dta	3.2587	2	R.GYNT*DGTGHIR.A	gi|16129648|ref|NP_416207.1| quinate/shikimate 5-dehydrogenase, NAD(P)-binding [Escherichia coli str. K-12 substr. MG1655]
CKII_9101112.01726.01726.2.dta	3.0917	2	R.VM#DS*NDLEKER.G	gi|49176434|ref|YP_026274.1| GTP-binding protein [Escherichia coli str. K-12 substr. MG1655]
CKII_9101112.01790.01790.3.dta	3.3085	3	K.VMYVRS*DDDSDKR.T	gi|16130506|ref|NP_417076.1| predicted methyltransferase [Escherichia coli str. K-12 substr. MG1655]
CKII_9101112.01916.01916.3.dta	3.4979	3	R.HDAS*DFETNTEDKR.Q	gi|90111524|ref|NP_417463.4| predicted S-transferase [Escherichia coli str. K-12 substr. MG1655]
CKII_9101112.01946.01946.2.dta	4.6554	2	R.HDAS*DFETNTEDK.R	gi|90111524|ref|NP_417463.4| predicted S-transferase [Escherichia coli str. K-12 substr. MG1655]
CKII_9101112.01973.01973.2.dta	2.9071	2	R.SEKS*DLGGTMR.L	gi|16130687|ref|NP_417260.1| CTP synthetase [Escherichia coli str. K-12 substr. MG1655]
CKII_9101112.02258.02258.2.dta	3.2362	2	K.HM#LESIDS*ASQK.Q	gi|16128603|ref|NP_415153.1| DNA-binding response regulator in two-component regulatory system with citA [Escherichia coli str. K-12 substr. MG1655]
CKII_9101112.02429.02429.2.dta	2.9073	2	-.MTDLHT*DVER.Y	gi|16131663|ref|NP_418256.1| site-specific tyrosine recombinase [Escherichia coli str. K-12 substr. MG1655]
CKII_9101112.02606.02606.3.dta	3.3791	3	R.LHHANDT*DSFSATNVH.-	gi|90111364|ref|NP_416484.2| conserved protein [Escherichia coli str. K-12 substr. MG1655]
CKII_9101112.02678.02678.3.dta	3.8393	3	R.LHHANDT*DSFS*ATNVH.-	gi|90111364|ref|NP_416484.2| conserved protein [Escherichia coli str. K-12 substr. MG1655]
CKII_9101112.02693.02693.2.dta	2.8849	2	R.RLEGEES*DLAR.K	gi|16131046|ref|NP_417623.1| conserved protein [Escherichia coli str. K-12 substr. MG1655]
CKII_9101112.02696.02696.2.dta	4.142	2	R.ILHSAET*DDDLK.S	gi|16131102|ref|NP_417679.1| glutamate synthase, large subunit [Escherichia coli str. K-12 substr. MG1655]
CKII_9101112.02904.02904.3.dta	3.4915	3	R.TEDT*DLQDDSHIDKHYK.V	gi|16129149|ref|NP_415704.1| sodium:proton antiporter [Escherichia coli str. K-12 substr. MG1655]
CKII_9101112.02957.02957.2.dta	3.5292	2	R.DGHALS*DEEIR.F	gi|16132199|ref|NP_418799.1| thymidine phosphorylase [Escherichia coli str. K-12 substr. MG1655]
CKII_9101112.02974.02974.2.dta	4.0308	2	R.SHAT*AQEEILK.L	gi|16130963|ref|NP_417539.1| RNA polymerase, sigma 70 (sigma D) factor [Escherichia coli str. K-12 substr. MG1655]
CKII_9101112.03021.03021.3.dta	4.7137	3	R.REEES*AAAAEVEER.T	gi|16129198|ref|NP_415753.1| global DNA-binding transcriptional dual regulator H-NS [Escherichia coli str. K-12 substr. MG1655]
CKII_9101112.03378.03378.2.dta	3.55	2	K.FRPGT*DEGDYQVK.L	gi|16129674|ref|NP_416233.1| protein chain initiation factor IF-3 [Escherichia coli str. K-12 substr. MG1655]
CKII_9101112.03399.03399.3.dta	3.0033	3	R.NPKT*GEDIPITAR.R	gi|16129668|ref|NP_416227.1| integration host factor (IHF), DNA-binding protein, alpha subunit [Escherichia coli str. K-12 substr. MG1655]
CKII_9101112.03446.03446.2.dta	3.8805	2	-.M#KSVVNDT*DGIVR.V	gi|16130029|ref|NP_416594.1| galactitol-1-phosphate dehydrogenase, Zn-dependent and NAD(P)-binding [Escherichia coli str. K-12 substr. MG1655]
CKII_9101112.03475.03475.2.dta	3.6055	2	K.HMLESIDS*ASQK.Q	gi|16128603|ref|NP_415153.1| DNA-binding response regulator in two-component regulatory system with citA [Escherichia coli str. K-12 substr. MG1655]
CKII_9101112.03559.03559.3.dta	5.0222	3	K.S*KRDDDS*YDEDVEDDEGVGEVR.V	gi|16130338|ref|NP_416907.1| cell division protein involved in Z ring assembly [Escherichia coli str. K-12 substr. MG1655]
CKII_9101112.03738.03738.2.dta	2.9911	2	R.HGLGMS*DQIENR.I	gi|16131063|ref|NP_417640.1| argininosuccinate synthetase [Escherichia coli str. K-12 substr. MG1655]
CKII_9101112.03751.03751.2.dta	3.2052	2	R.M#KGEMPS*DFDAK.A	gi|49176286|ref|YP_026188.1| transketolase 1, thiamin-binding [Escherichia coli str. K-12 substr. MG1655]
CKII_9101112.03983.03983.2.dta	4.54	2	K.HEIGS*AYPGDEVR.E	gi|90111564|ref|NP_417717.2| cell wall structural complex MreBCD, actin-like component MreB [Escherichia coli str. K-12 substr. MG1655]
CKII_9101112.04056.04056.2.dta	3.273	2	R.YLHS*DIDTVER.M	gi|16128747|ref|NP_415300.1| excinulease of nucleotide excision repair, DNA damage recognition component [Escherichia coli str. K-12 substr. MG1655]
CKII_9101112.04092.04092.2.dta	3.7016	2	K.AQHS*ALDDIPR.S	gi|16130688|ref|NP_417261.1| nucleoside triphosphate pyrophosphohydrolase [Escherichia coli str. K-12 substr. MG1655]
CKII_9101112.04116.04116.2.dta	3.1311	2	K.TPFVAHPALHS*.-	gi|90111334|ref|NP_416308.4| predicted diguanylate cyclase [Escherichia coli str. K-12 substr. MG1655]
CKII_9101112.04291.04291.3.dta	4.061	3	R.RENELEEAVM#S*DR.D	gi|16131060|ref|NP_417637.1| fused protein chain initiation factor 2, IF2: membrane protein/conserved protein [Escherichia coli str. K-12 substr. MG1655]
CKII_9101112.04311.04311.2.dta	4.8247	2	-.MKSVVNDT*DGIVR.V	gi|16130029|ref|NP_416594.1| galactitol-1-phosphate dehydrogenase, Zn-dependent and NAD(P)-binding [Escherichia coli str. K-12 substr. MG1655]
CKII_9101112.04450.04450.3.dta	4.9686	3	K.RDDDS*YDEDVEDDEGVGEVR.V	gi|16130338|ref|NP_416907.1| cell division protein involved in Z ring assembly [Escherichia coli str. K-12 substr. MG1655]
CKII_9101112.04486.04486.3.dta	3.3444	3	R.IYDS*DSILSM#HHEPR.H	gi|90111670|ref|NP_418397.2| pyridine nucleotide transhydrogenase, soluble [Escherichia coli str. K-12 substr. MG1655]
CKII_9101112.04504.04504.3.dta	3.9668	3	R.FHTLSGGKPQVEGAEDYTDS*DD.-	gi|16131624|ref|NP_418213.1| conserved protein [Escherichia coli str. K-12 substr. MG1655]
CKII_9101112.04523.04523.3.dta	3.1374	3	K.RFHTLSGGKPQVEGAEDYT*DS*DD.-	gi|16131624|ref|NP_418213.1| conserved protein [Escherichia coli str. K-12 substr. MG1655]
CKII_9101112.04538.04538.3.dta	3.2552	3	R.FHTLSGGKPQVEGAEDYT*DS*DD.-	gi|16131624|ref|NP_418213.1| conserved protein [Escherichia coli str. K-12 substr. MG1655]
CKII_9101112.05005.05005.3.dta	3.157	3	R.AHFSYSDSAEM#LSGNS*DLNEK.L	gi|16128891|ref|NP_415444.1| fused chromosome partitioning protein: predicted nucleotide hydrolase/conserved protein/conserved protein [Escherichia coli str. K-12 substr. MG1655]
CKII_9101112.05034.05034.2.dta	4.0822	2	K.KYDIPVVM#DS*AR.F	gi|90111643|ref|NP_418164.4| tryptophanase/L-cysteine desulfhydrase, PLP-dependent [Escherichia coli str. K-12 substr. MG1655]
CKII_9101112.05107.05107.2.dta	3.0687	2	R.DKLEPYFT*EGR.Y	gi|16131430|ref|NP_418016.1| glycine tRNA synthetase, beta subunit [Escherichia coli str. K-12 substr. MG1655]
CKII_9101112.05170.05170.3.dta	4.4373	3	-.M#HENQQPQTEAFELS*AAER.E	gi|16130220|ref|NP_416788.1| NADH:ubiquinone oxidoreductase, chain E [Escherichia coli str. K-12 substr. MG1655]
CKII_9101112.05237.05237.3.dta	3.0248	3	K.LHEEAM#ALPS*EEEFAER.K	gi|16129047|ref|NP_415602.1| fused ribonucleaseE: endoribonuclease/RNA-binding protein/RNA degradosome binding protein [Escherichia coli str. K-12 substr. MG1655]
CKII_9101112.05287.05287.3.dta	4.6769	3	-.MHENQQPQTEAFELS*AAER.E	gi|16130220|ref|NP_416788.1| NADH:ubiquinone oxidoreductase, chain E [Escherichia coli str. K-12 substr. MG1655]
CKII_9101112.05301.05301.2.dta	4.4374	2	R.AATHDVLAGLT*AR.E	gi|16130963|ref|NP_417539.1| RNA polymerase, sigma 70 (sigma D) factor [Escherichia coli str. K-12 substr. MG1655]
CKII_9101112.05340.05340.3.dta	3.0483	3	K.RDVNTVS*EPDSQIPPGFRG.-	gi|16132183|ref|NP_418782.1| DNA biosynthesis protein (primosomal protein I) [Escherichia coli str. K-12 substr. MG1655]
CKII_9101112.05442.05442.3.dta	4.6348	3	K.ERNEEPEIEEEIDES*EDETVDEER.V	gi|16131266|ref|NP_417847.1| predicted protein [Escherichia coli str. K-12 substr. MG1655]
CKII_9101112.05680.05680.2.dta	3.2379	2	R.HLS*EAEIDNYVR.K	gi|90111211|ref|NP_415605.2| predicted protein [Escherichia coli str. K-12 substr. MG1655]
CKII_9101112.05690.05690.3.dta	3.056	3	R.HLS*EAEIDNYVR.K	gi|90111211|ref|NP_415605.2| predicted protein [Escherichia coli str. K-12 substr. MG1655]
CKII_9101112.05703.05703.3.dta	3.1721	3	R.AHGFAVSLDS*DDVETR.M	gi|16129245|ref|NP_415800.1| predicted DNA-binding transcriptional regulator [Escherichia coli str. K-12 substr. MG1655]
CKII_9101112.05710.05710.2.dta	2.9524	2	K.RLDMLNEELS*DK.E	gi|16130513|ref|NP_417083.1| protein disaggregation chaperone [Escherichia coli str. K-12 substr. MG1655]
CKII_9101112.06013.06013.3.dta	3.0894	3	K.EHGYETVVMGAS*FR.N	gi|16128002|ref|NP_414549.1| transaldolase B [Escherichia coli str. K-12 substr. MG1655]
CKII_9101112.06056.06056.3.dta	3.0026	3	K.VM#GDYT*DIEIIEAHHR.H	gi|16128025|ref|NP_414572.1| dihydrodipicolinate reductase [Escherichia coli str. K-12 substr. MG1655]
CKII_9101112.06072.06072.2.dta	3.7282	2	K.KYDIPVVMDS*AR.F	gi|90111643|ref|NP_418164.4| tryptophanase/L-cysteine desulfhydrase, PLP-dependent [Escherichia coli str. K-12 substr. MG1655]
CKII_9101112.06102.06102.3.dta	3.5681	3	R.VMIHQPLGGYQGQAT*DIEIHAR.E	gi|16128422|ref|NP_414971.1| proteolytic subunit of ClpA-ClpP and ClpX-ClpP ATP-dependent serine proteases [Escherichia coli str. K-12 substr. MG1655]
CKII_9101112.06248.06248.3.dta	3.0902	3	K.AEGKS*EFAENDAYVHATPLIR.R	gi|16128108|ref|NP_414657.1| pyruvate dehydrogenase, dihydrolipoyltransacetylase component E2 [Escherichia coli str. K-12 substr. MG1655]
CKII_9101112.06282.06282.3.dta	3.7349	3	R.HQS*DDYPHNPNTEDLSQFSYTVR.N	gi|90111286|ref|NP_416015.2| conserved protein [Escherichia coli str. K-12 substr. MG1655]
CKII_9101112.06323.06323.3.dta	3.3407	3	K.RYNWAYET*EPEPFM#NNR.R	gi|16128296|ref|NP_414845.1| choline dehydrogenase, a flavoprotein [Escherichia coli str. K-12 substr. MG1655]
CKII_9101112.06507.06507.4.dta	3.7854	4	K.LMEIAQQQHAQQQTAGADAS*ANNAKDDDVVDAEFEEVK.D	gi|16128008|ref|NP_414555.1| chaperone Hsp70, co-chaperone with DnaJ [Escherichia coli str. K-12 substr. MG1655]
CKII_9101112.06534.06534.3.dta	3.1636	3	K.RFDIVVS*DCCPEDEYVK.Y	gi|16128808|ref|NP_415361.1| DNA-binding transcriptional repressor [Escherichia coli str. K-12 substr. MG1655]
CKII_9101112.06589.06589.3.dta	3.3983	3	-.M#KQPGEELQETLT*ELDDR.A	gi|16131662|ref|NP_418255.1| conserved protein [Escherichia coli str. K-12 substr. MG1655]
CKII_9101112.06641.06641.2.dta	3.7202	2	-.MKNT*ELEQLINEK.L	gi|16128685|ref|NP_415238.1| conserved metal-binding protein [Escherichia coli str. K-12 substr. MG1655]
CKII_9101112.06844.06844.3.dta	3.1447	3	K.RYNWAYET*EPEPFMNNR.R	gi|16128296|ref|NP_414845.1| choline dehydrogenase, a flavoprotein [Escherichia coli str. K-12 substr. MG1655]
CKII_9101112.06897.06897.3.dta	3.5546	3	K.DVFVHFSAIQNDGYKS*LDEGQK.V	gi|16131427|ref|NP_418012.1| major cold shock protein [Escherichia coli str. K-12 substr. MG1655]
CKII_9101112.07386.07386.2.dta	3.2167	2	R.HAS*DDEPFSALAFK.I	gi|16131219|ref|NP_417799.1| protein chain elongation factor EF-G, GTP-binding [Escherichia coli str. K-12 substr. MG1655]
CKII_9101112.07466.07466.3.dta	3.5118	3	R.RYEGEIIQS*DRPGENILLFK.R	gi|16129376|ref|NP_415933.1| aldehyde dehydrogenase A, NAD-linked [Escherichia coli str. K-12 substr. MG1655]
CKII_9101112.07656.07656.3.dta	3.5416	3	K.NKYELS*DNELAVFYSAADHR.L	gi|16128444|ref|NP_414993.1| modulator of gene expression, with H-NS [Escherichia coli str. K-12 substr. MG1655]

## Sheet: UTFctrl
Spectral file	Sequest Xcorr	Z	Peptide	E. coli Protein
UTFctrl_1.00840.00840.2.dta	2.0456	2	K.T*IIKDKGTMS*VLT*NAK.A	gi|90111474|ref|NP_417134.2| adhesin-like autotransporter [Escherichia coli str. K-12 substr. MG1655]
UTFctrl_2.01346.01346.2.dta	2.2109	2	K.T*IIKDKGT*MSVLT*NAK.A	gi|90111474|ref|NP_417134.2| adhesin-like autotransporter [Escherichia coli str. K-12 substr. MG1655]
UTFctrl_2.02367.02367.3.dta	3.6096	3	K.EHGYETVVM#GAS*FR.N	gi|16128002|ref|NP_414549.1| transaldolase B [Escherichia coli str. K-12 substr. MG1655]
UTFctrl_2.03220.03220.2.dta	3.0123	2	K.EHGYETVVMGAS*FR.N	gi|16128002|ref|NP_414549.1| transaldolase B [Escherichia coli str. K-12 substr. MG1655]
UTFctrl_3.02598.02598.3.dta	3.8066	3	K.EHGYETVVM#GAS*FR.N	gi|16128002|ref|NP_414549.1| transaldolase B [Escherichia coli str. K-12 substr. MG1655]
UTFctrl_3.07803.07803.4.dta	3.1462	4	K.LGET*IIAQALVTAT*TTGDGAADNAKS*AVEK.V	##gi|16131968|ref|NP_418567.1| Cpn60 chaperonin GroEL, large subunit of GroESL [Escherichia coli str. K-12 substr. MG1655]
UTFctrl_4.01958.01958.3.dta	3.0359	3	R.EIIGES*IVLVR.G	gi|16129756|ref|NP_416316.1| predicted 2Fe-2S cluster-containing protein [Escherichia coli str. K-12 substr. MG1655]
UTFctrl_4.03077.03077.3.dta	3.1875	3	K.EHGYETVVM#GAS*FR.N	gi|16128002|ref|NP_414549.1| transaldolase B [Escherichia coli str. K-12 substr. MG1655]
UTFctrl_4.04090.04090.3.dta	3.9318	3	R.VKHPS*EIVNVGDEITVK.V	gi|16128878|ref|NP_415431.1| 30S ribosomal subunit protein S1 [Escherichia coli str. K-12 substr. MG1655]
UTFctrl_4.04920.04920.3.dta	3.0807	3	K.MLPPFRLGLGGPIGS*GR.Q	gi|16130239|ref|NP_416807.1| conserved protein with NAD(P)-binding Rossmann-fold domain [Escherichia coli str. K-12 substr. MG1655]
UTFctrl_4.05930.05930.3.dta	3.0453	3	R.VAIKGPLTTPVGGGIRS*LNVALR.Q	gi|16129099|ref|NP_415654.1| e14 prophage; isocitrate dehydrogenase, specific for NADP+ [Escherichia coli str. K-12 substr. MG1655]
UTFctrl_4.08341.08341.4.dta	3.2601	4	K.KTYLIAVGSVIGILMT*SYAAGTATGVGFSIR.D	##gi|16131493|ref|NP_418079.1| O-antigen ligase [Escherichia coli str. K-12 substr. MG1655]
UTFctrl_5678.04976.04976.2.dta	2.3471	2	R.NVDAIILSAVS*ENGSSR.T	gi|16130473|ref|NP_417043.1| predicted sugar transporter subunit: periplasmic-binding component of ABC superfamily [Escherichia coli str. K-12 substr. MG1655]

## Sheet: pUC19ctrl
Spectral file	Sequest Xcorr	Z	Peptide	E. coli Protein
PUC19ctrl_1.03064.03064.2.dta	2.3018	2	K.VDVIDS*S*GAKR.F	##gi|16130692|ref|NP_417265.1| 23S rRNA (uracil-5)-methyltransferase [Escherichia coli str. K-12 substr. MG1655]
PUC19ctrl_1.04891.04891.2.dta	2.5757	2	R.SRDNQIT*T*LR.D	##gi|49176361|ref|YP_026224.1| rhsB element core protein RshB [Escherichia coli str. K-12 substr. MG1655]
PUC19ctrl_1.05424.05424.2.dta	2.4911	2	R.ETTPFPSS*PTS*DGRT*K.A	##gi|49176330|ref|YP_026208.1| conserved membrane protein, predicted transporter [Escherichia coli str. K-12 substr. MG1655]
PUC19ctrl_1.05995.05995.2.dta	2.3651	2	K.AEART*M#S*ISQALEADGR.V	##gi|16131144|ref|NP_417722.1| acetyl-CoA carboxylase, biotin carboxylase subunit [Escherichia coli str. K-12 substr. MG1655]
PUC19ctrl_1.06794.06794.2.dta	2.3825	2	K.S*YRGMGSLGAM#S*K.G	gi|16130433|ref|NP_417003.1| IMP dehydrogenase [Escherichia coli str. K-12 substr. MG1655]
PUC19ctrl_1.07450.07450.2.dta	2.3654	2	R.LS*ASLATGGLS*PR.Q	gi|16128683|ref|NP_415236.1| deoxyribodipyrimidine photolyase, FAD-binding [Escherichia coli str. K-12 substr. MG1655]
PUC19ctrl_1.07491.07491.2.dta	2.4349	2	R.KAS*GGKIEVLVER.M	gi|16128390|ref|NP_414939.1| S-adenosylmethionine:tRNA ribosyltransferase-isomerase [Escherichia coli str. K-12 substr. MG1655]
PUC19ctrl_2.04519.04519.2.dta	2.7415	2	K.CLTLM#ELFGT*S*EK.I	##gi|16131494|ref|NP_418080.1| lipopolysaccharide core biosynthesis [Escherichia coli str. K-12 substr. MG1655]
PUC19ctrl_3.02526.02526.2.dta	2.4926	2	-.M#T*T*FHSLTVAK.V	gi|16129353|ref|NP_415910.1| predicted multicomponent oxygenase/reductase subunit for phenylacetic acid degradation [Escherichia coli str. K-12 substr. MG1655]
PUC19ctrl_3.03643.03643.2.dta	2.5468	2	K.TLVGDLQPDSGT*VK.W	gi|16128788|ref|NP_415341.1| fused predicted transporter subunits of ABC superfamily: ATP-binding components [Escherichia coli str. K-12 substr. MG1655]
PUC19ctrl_3.04171.04171.2.dta	2.4948	2	R.S*LNVALR.Q	gi|16129099|ref|NP_415654.1| e14 prophage; isocitrate dehydrogenase, specific for NADP+ [Escherichia coli str. K-12 substr. MG1655]
PUC19ctrl_3.04898.04898.2.dta	3.4713	2	R.LPQVEGT*GGDVQPSQDLVR.V	gi|16130513|ref|NP_417083.1| protein disaggregation chaperone [Escherichia coli str. K-12 substr. MG1655]
PUC19ctrl_3.05305.05305.2.dta	2.7187	2	R.IAVTNLRT*PDEI.-	gi|16130222|ref|NP_416790.1| NADH:ubiquinone oxidoreductase, chain B [Escherichia coli str. K-12 substr. MG1655]
PUC19ctrl_3.05652.05652.2.dta	4.1497	2	K.DGGDFDQFTGAT*ITPR.A	gi|16129589|ref|NP_416148.1| predicted oxidoreductase [Escherichia coli str. K-12 substr. MG1655]
PUC19ctrl_3.05859.05859.2.dta	2.5176	2	R.GS*FESFAQAVR.D	gi|16130029|ref|NP_416594.1| galactitol-1-phosphate dehydrogenase, Zn-dependent and NAD(P)-binding [Escherichia coli str. K-12 substr. MG1655]
PUC19ctrl_3.06443.06443.3.dta	3.3043	3	K.GYT*LNGRTIRAAMVT*VAK.A	gi|16130533|ref|NP_417104.1| heat shock protein [Escherichia coli str. K-12 substr. MG1655]
PUC19ctrl_4.03483.03483.2.dta	2.7428	2	-.MIS*RVT*EALS*K.V	gi|16128076|ref|NP_414625.1| membrane bound cell division protein at septum containing leucine zipper motif [Escherichia coli str. K-12 substr. MG1655]
PUC19ctrl_4.03644.03644.2.dta	2.5496	2	K.M#FT*VEKGKIT*D.-	gi|16131568|ref|NP_418155.1| gap repair protein [Escherichia coli str. K-12 substr. MG1655]
PUC19ctrl_4.04471.04471.2.dta	2.4447	2	R.DIEEPNT*IGLS*K.L	##gi|16128156|ref|NP_414705.1| conserved protein [Escherichia coli str. K-12 substr. MG1655]
PUC19ctrl_4.04953.04953.2.dta	2.4479	2	K.DKVSS*GAFAFDK.G	##gi|16130245|ref|NP_416813.1| lysine/arginine/ornithine transporter subunit [Escherichia coli str. K-12 substr. MG1655]
PUC19ctrl_5678.04165.04165.3.dta	4.21	3	K.GGPLADGIVITPS*HNPPEDGGIK.Y	gi|16128664|ref|NP_415214.1| phosphoglucomutase [Escherichia coli str. K-12 substr. MG1655]
PUC19ctrl_9101112.04773.04773.4.dta	3.0022	4	K.GSMLAEVAFRLIT*RHDDT*LFAQEPK.H	##gi|16128268|ref|NP_414817.1| conserved protein [Escherichia coli str. K-12 substr. MG1655]
